# Supplementary material for: Comparative Genome Analysis Reveals Accumulation of Single-Nucleotide Repeats in Pathogenic Escherichia Lineages
Source: MDPI journal article supplement (doi:10.3390/cimb44020034), 2022-01-20
Supplement: s1 [file s1]

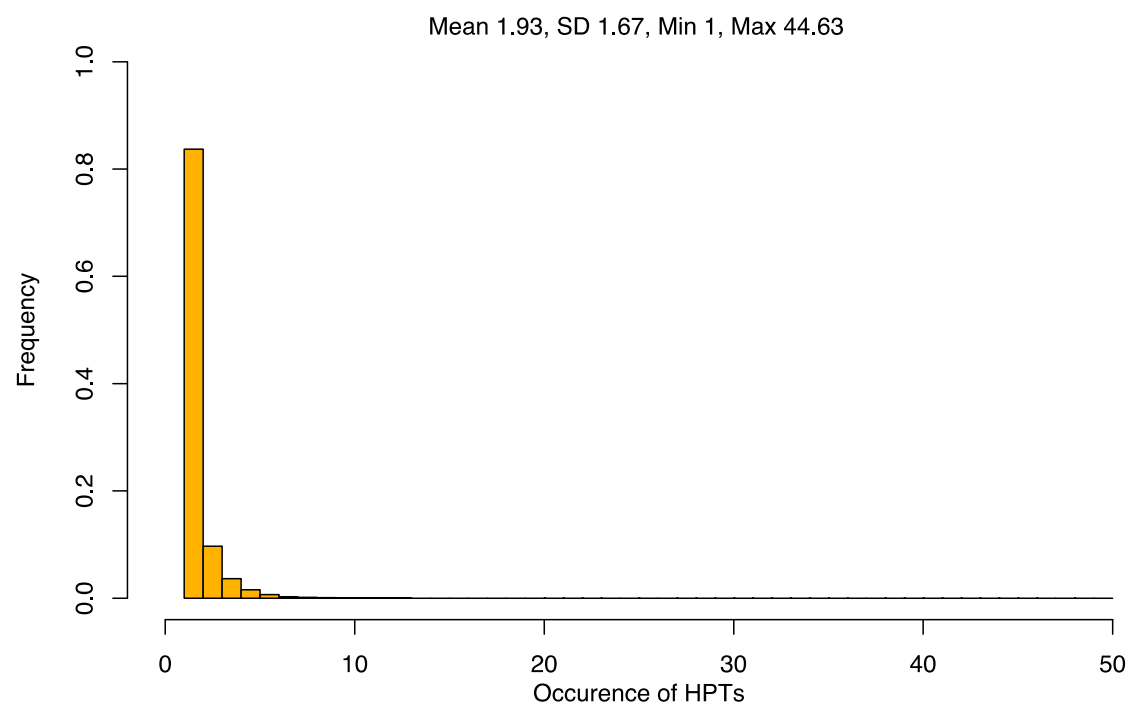

**Figure S3.** Frequency of homopolymeric tracts (HPTs) in genes with intragenic HPTs. SD, standard deviation.
