# Supplementary material for: Comparative Genome Analysis Reveals Accumulation of Single-Nucleotide Repeats in Pathogenic Escherichia Lineages
Source: MDPI journal article supplement (doi:10.3390/cimb44020034), 2022-01-20
Supplement: s1 [file s1]

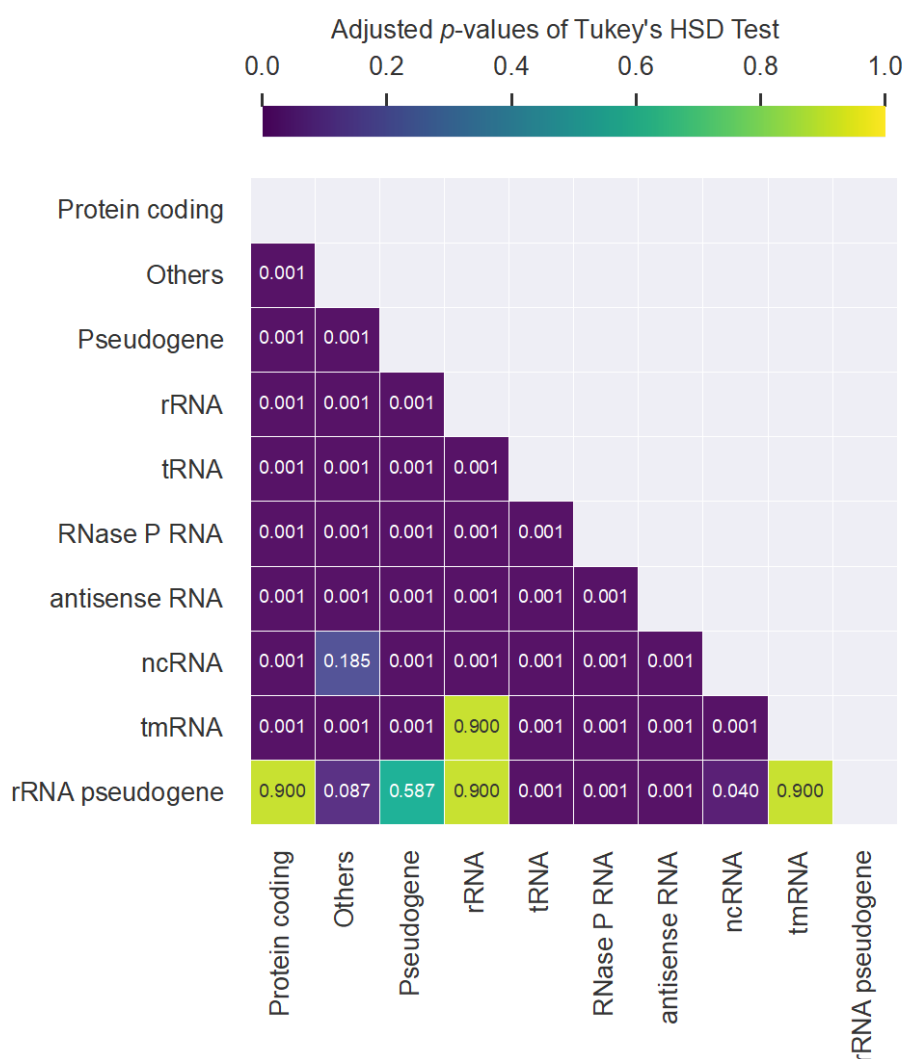

**Figure S2.** Multiple comparisons of homopolymeric tract repeat lengths between different genomic features. Multiple comparison tests were performed using Tukey's honestly significant difference test ( $\alpha = 0.05$ ). The colors correspond to the adjusted  $p$ -values. Dark blue represent closer to 0, whereas yellow represent closer to 1.
