# Supplementary material for: Comparative Genome Analysis Reveals Accumulation of Single-Nucleotide Repeats in Pathogenic Escherichia Lineages
Source: MDPI journal article supplement (doi:10.3390/cimb44020034), 2022-01-20
Supplement: s1 [file s1]

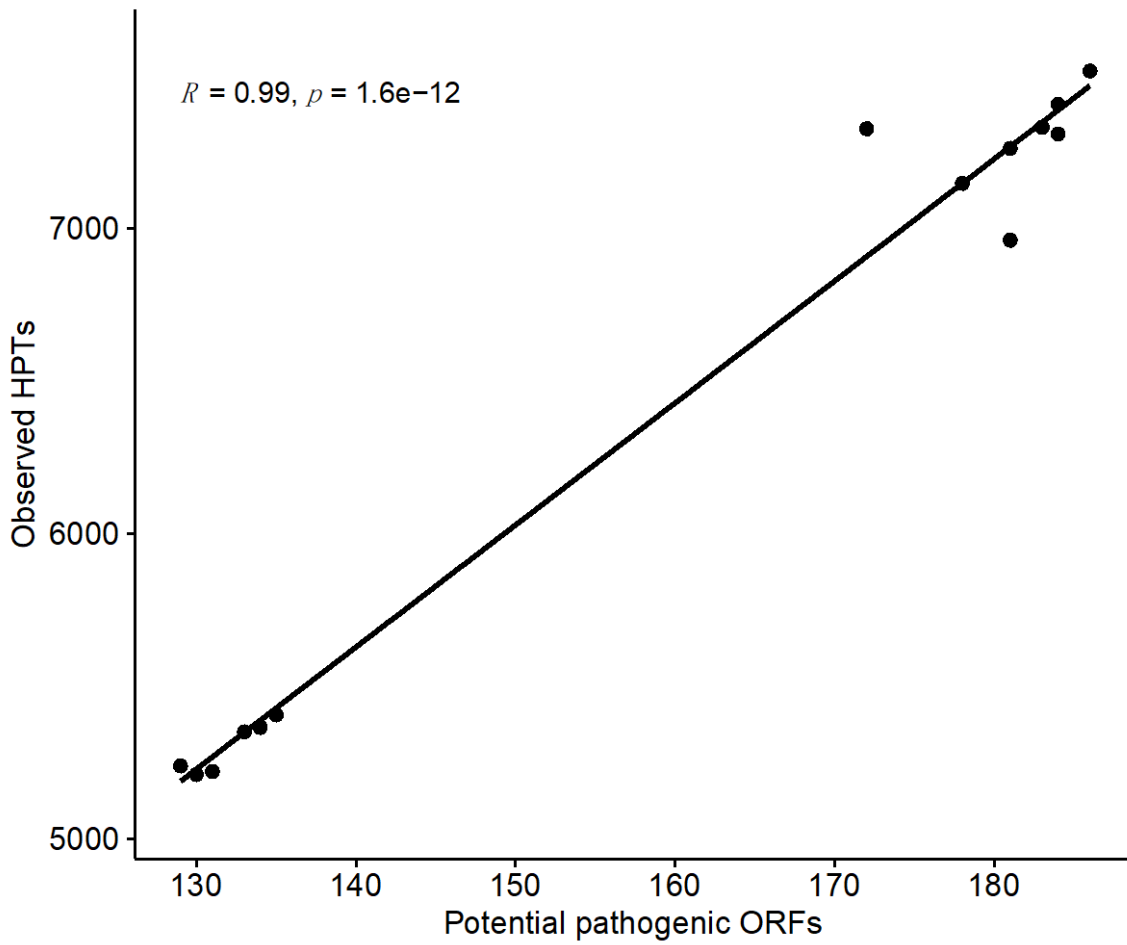

**Figure S9.** Scatter plots in the number of potential pathogenic ORFs and the number of HPTs. These pathogenic ORFs were estimated by the PathoFact pipeline. These ORFs contain the coding regions of bacterial toxin genes.  $R$  and  $p$  indicate the Pearson's correlation coefficient and the  $p$ -value in the uncorrelated test, respectively.
