# Supplementary material for: Comparative Genome Analysis Reveals Accumulation of Single-Nucleotide Repeats in Pathogenic Escherichia Lineages
Source: MDPI journal article supplement (doi:10.3390/cimb44020034), 2022-01-20
Supplement: s1 [file s1]

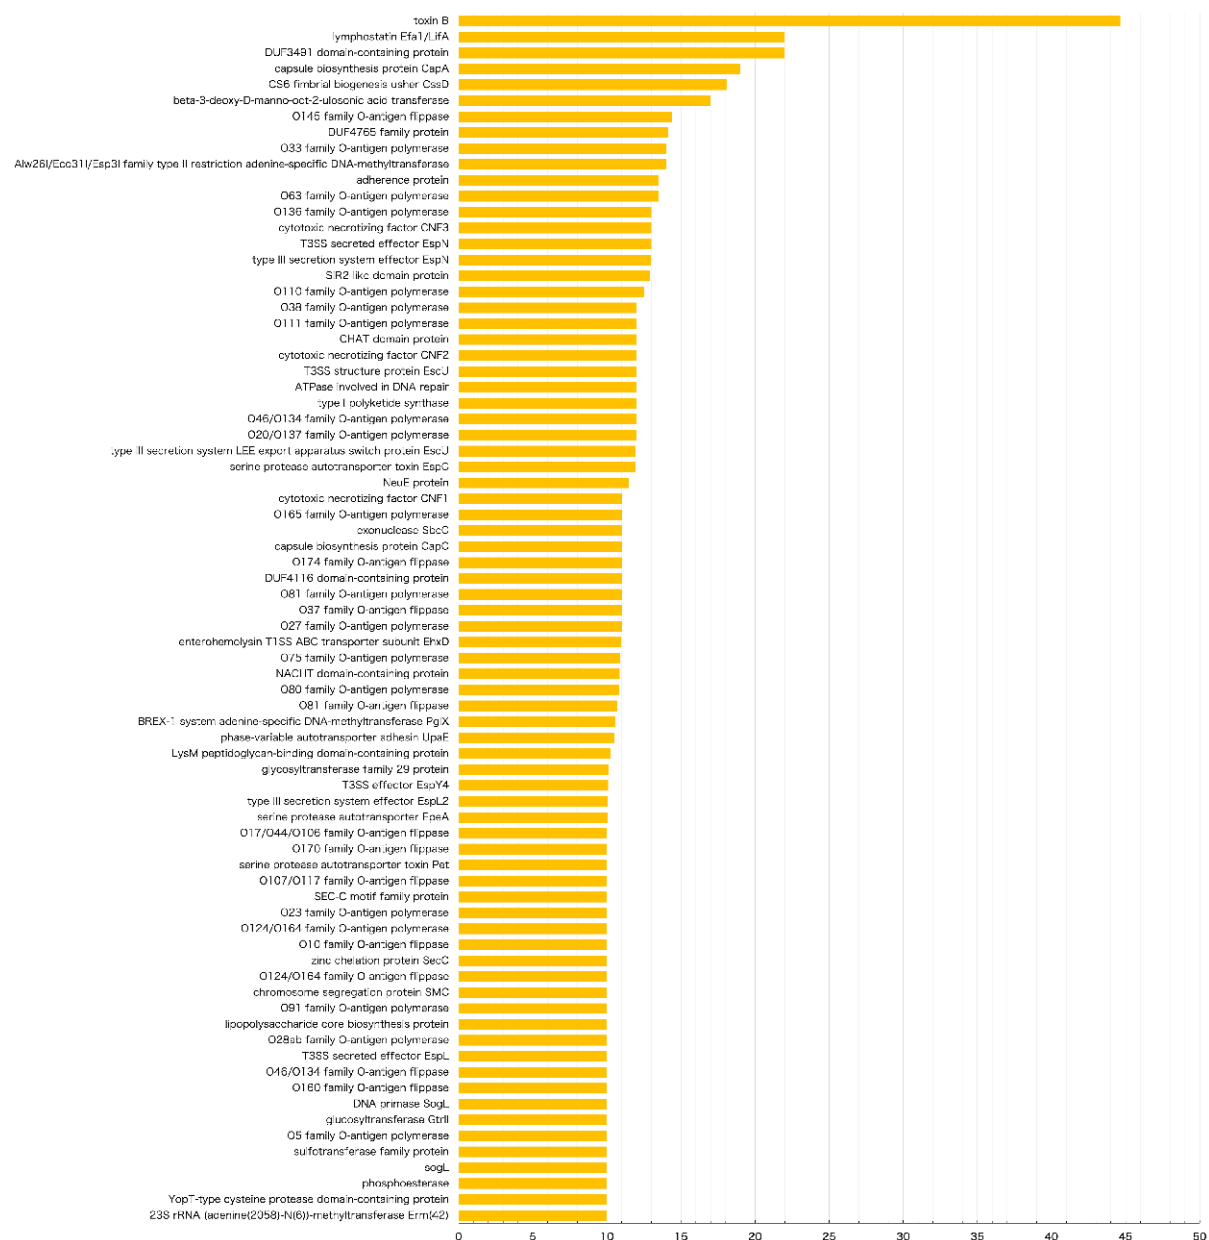

**Figure S8.** Genes in which homopolymeric tracts (HPTs) appear at a frequency of >10 relative to the frequency of HPTs in all annotated genes. The X and Y axes show the number of occurrences of HPTs (mean value) and gene name, respectively.
