# Supplementary material for: Comparative Genome Analysis Reveals Accumulation of Single-Nucleotide Repeats in Pathogenic Escherichia Lineages
Source: Curr Issues Mol Biol. 2022 Jan 20;44(2):498–504. doi: 10.3390/cimb44020034 (PMC8928963; doi:10.3390/cimb44020034)
Supplement: Supplementary file 1 [file cimb-44-00034-s001.zip › Table S1.xlsx]

## Sheet: sheet1
Table S1. Stastics of the homopolymeric tracts in Helicobacter and Propionibacterium genomes
Helicobacter (n=266, public complete assemblies from Refseq)							Propionibacterium (n=20, public complete assemblies from Refseq)
	Counta	Meanb	SDc	Mind	Maxe			Counta	Meanb	SDc	Mind	Maxe
A	1003104	6.34	0.72	6	53		A	314	6.12	0.33	6	8
C	97894	6.4	1.16	6	155		C	6793	6.08	0.39	6	15
G	103574	6.43	1.2	6	77		G	6781	6.1	0.53	6	31
T	1010747	6.34	0.75	6	78		T	431	6.06	0.25	6	7
All	2215319	6.35	0.79	6	155		All	14319	6.09	0.46	6	31
A+T / G+C	10	-	-	-	-		A+T / G+C	0.05	-	-	-	-
aSummarized by the type of nucleotide (A/T/G/C), regardless of the length of the homopolymeric tract repeats observed.
bThe average homopolymeric tract repeat length.
cThe standard deviation in the length of the repeat.
dThe minimum length of repeat.
eThe maximum length of repeat.
