# Supplementary material for: Comparative Genome Analysis Reveals Accumulation of Single-Nucleotide Repeats in Pathogenic Escherichia Lineages
Source: Curr Issues Mol Biol. 2022 Jan 20;44(2):498–504. doi: 10.3390/cimb44020034 (PMC8928963; doi:10.3390/cimb44020034)
Supplement: Supplementary file 1 [file cimb-44-00034-s001.zip › Table S2.xlsx]

## Sheet: Sheet1
Table S2. Multiple comparisons between genomic features based on length of homopolymeric tract repeats (Tukey's HSD, FWER = 0.05).
Group 1	Group 2	Mean difference	p-adj	Lower	Upper	Significance
RNase_P_RNA	antisense_RNA	1.0037	0.001	0.9542	1.0532	TRUE
RNase_P_RNA	ncRNA	-0.5324	0.001	-0.585	-0.4798	TRUE
RNase_P_RNA	other	-0.5656	0.001	-0.6006	-0.5306	TRUE
RNase_P_RNA	protein_coding	-0.7725	0.001	-0.8074	-0.7375	TRUE
RNase_P_RNA	pseudogene	-0.6801	0.001	-0.7153	-0.645	TRUE
RNase_P_RNA	rRNA	-0.9842	0.001	-1.0204	-0.948	TRUE
RNase_P_RNA	rRNA_pseudogene	-0.9144	0.001	-1.2872	-0.5417	TRUE
RNase_P_RNA	tRNA	0.5703	0.001	0.5298	0.6107	TRUE
RNase_P_RNA	tmRNA	-0.9978	0.001	-1.0584	-0.9372	TRUE
antisense_RNA	ncRNA	-1.5361	0.001	-1.5888	-1.4834	TRUE
antisense_RNA	other	-1.5693	0.001	-1.6044	-1.5343	TRUE
antisense_RNA	protein_coding	-1.7762	0.001	-1.8112	-1.7411	TRUE
antisense_RNA	pseudogene	-1.6839	0.001	-1.719	-1.6487	TRUE
antisense_RNA	rRNA	-1.9879	0.001	-2.0242	-1.9516	TRUE
antisense_RNA	rRNA_pseudogene	-1.9182	0.001	-2.2909	-1.5454	TRUE
antisense_RNA	tRNA	-0.4334	0.001	-0.4739	-0.3929	TRUE
antisense_RNA	tmRNA	-2.0015	0.001	-2.0622	-1.9408	TRUE
ncRNA	other	-0.0332	0.1851	-0.0726	0.0061	FALSE
ncRNA	protein_coding	-0.2401	0.001	-0.2794	-0.2008	TRUE
ncRNA	pseudogene	-0.1478	0.001	-0.1872	-0.1083	TRUE
ncRNA	rRNA	-0.4518	0.001	-0.4923	-0.4114	TRUE
ncRNA	rRNA_pseudogene	-0.3821	0.0398	-0.7552	-0.0089	TRUE
ncRNA	tRNA	1.1027	0.001	1.0584	1.147	TRUE
ncRNA	tmRNA	-0.4654	0.001	-0.5286	-0.4021	TRUE
other	protein_coding	-0.2069	0.001	-0.2082	-0.2055	TRUE
other	pseudogene	-0.1145	0.001	-0.1181	-0.111	TRUE
other	rRNA	-0.4186	0.001	-0.4281	-0.4091	TRUE
other	rRNA_pseudogene	-0.3488	0.0868	-0.72	0.0223	FALSE
other	tRNA	1.1359	0.001	1.1155	1.1563	TRUE
other	tmRNA	-0.4322	0.001	-0.4817	-0.3826	TRUE
protein_coding	pseudogene	0.0923	0.001	0.0889	0.0958	TRUE
protein_coding	rRNA	-0.2117	0.001	-0.2212	-0.2023	TRUE
protein_coding	rRNA_pseudogene	-0.142	0.9	-0.5131	0.2291	FALSE
protein_coding	tRNA	1.3428	0.001	1.3224	1.3631	TRUE
protein_coding	tmRNA	-0.2253	0.001	-0.2748	-0.1758	TRUE
pseudogene	rRNA	-0.3041	0.001	-0.3141	-0.294	TRUE
pseudogene	rRNA_pseudogene	-0.2343	0.5866	-0.6054	0.1368	FALSE
pseudogene	tRNA	1.2504	0.001	1.2298	1.2711	TRUE
pseudogene	tmRNA	-0.3176	0.001	-0.3673	-0.268	TRUE
rRNA	rRNA_pseudogene	0.0698	0.9	-0.3015	0.441	FALSE
rRNA	tRNA	1.5545	0.001	1.5321	1.577	TRUE
rRNA	tmRNA	-0.0136	0.9	-0.064	0.0369	FALSE
rRNA_pseudogene	tRNA	1.4847	0.001	1.1131	1.8564	TRUE
rRNA_pseudogene	tmRNA	-0.0833	0.9	-0.4577	0.2911	FALSE
tRNA	tmRNA	-1.5681	0.001	-1.6216	-1.5145	TRUE
p-adj, adjusted p-value; HSD, honestly significant difference; FWER, familywise error rate
