# Supplementary material for: Comparative Genome Analysis Reveals Accumulation of Single-Nucleotide Repeats in Pathogenic Escherichia Lineages
Source: Curr Issues Mol Biol. 2022 Jan 20;44(2):498–504. doi: 10.3390/cimb44020034 (PMC8928963; doi:10.3390/cimb44020034)
Supplement: Supplementary file 1 [file cimb-44-00034-s001.zip › Table S3.xlsx]

## Sheet: Sheet1
Table S3. Nearest neighbor genes of intergenic homopolymeric tracts.
Gene	%
hypothetical protein	8.91968
MFS transporter	0.841022
LysR family transcriptional regulator	0.310835
symporter	0.307604
helix-turn-helix domain-containing protein	0.270378
membrane protein	0.267061
tyrosine-type recombinase/integrase	0.264449
GGDEF domain-containing protein	0.259705
IS3 family transposase	0.254567
phage tail tape measure protein	0.249651
phage portal protein	0.247297
fimbrial protein	0.234235
transposase	0.229732
molybdopterin-dependent oxidoreductase	0.227326
transcriptional regulator	0.214075
exonuclease	0.213147
glycosyltransferase	0.207252
RHS repeat protein	0.197284
antiporter	0.19682
autotransporter outer membrane beta-barrel domain-containing protein	0.193572
phage tail protein	0.192747
fimbria/pilus periplasmic chaperone	0.190701
ShET2/EspL2 family type III secretion system effector toxin	0.185546
fimbrial biogenesis outer membrane usher protein	0.182555
site-specific integrase	0.178705
helix-turn-helix transcriptional regulator	0.178069
DMT family transporter	0.174237
AraC family transcriptional regulator	0.172742
putative inner membrane protein	0.16994
phage terminase large subunit family protein	0.168359
DUF4132 domain-containing protein	0.166829
AAA family ATPase	0.15461
glycosyltransferase family 2 protein	0.150262
IS1 family transposase	0.144642
phosphoethanolamine transferase	0.143593
ATP-binding protein	0.14215
EAL domain-containing protein	0.139967
alpha-2-macroglobulin family protein	0.13744
fimbria/pilus outer membrane usher protein	0.130996
ABC transporter permease	0.128916
toxin B (plasmid)	0.125049
oxidoreductase	0.122213
DUF2138 domain-containing protein	0.122127
acid-sensing system histidine kinase EvgS	0.118759
type 1 fimbrial protein	0.118106
GntR family transcriptional regulator	0.11771
ISAs1 family transposase	0.115425
mechanosensitive channel protein	0.114393
DNA translocase FtsK	0.113929
cyclopropane fatty acyl phospholipid synthase	0.113895
alpha/beta hydrolase	0.113431
SoxR	0.112984
ribonuclease R	0.109684
alpha-amylase	0.104717
type III secretion system effector EspX1	0.104271
diguanylate cyclase	0.104185
host specificity protein J	0.100541
DNA-binding protein	0.0996646
ATP-dependent DNA helicase DinG	0.0995614
integrase	0.0980318
ABC transporter ATP-binding protein	0.0962273
tripartite efflux pump membrane subunit EmrY	0.0954539
fatty acid oxidation complex subunit alpha FadJ	0.095282
recombinase family protein	0.0950242
DUF4049 domain-containing protein	0.0946977
mechanosensitive channel MscK	0.0946633
replication endonuclease	0.0935118
D-lactate dehydrogenase	0.0934774
inner membrane protein	0.0920166
Cys-tRNA(Pro) and Cys-tRNA(Cys) deacylase	0.0920166
oxygen-sensing cyclic-di-GMP phosphodiesterase	0.0917072
fimbrial biogenesis usher protein	0.0913635
acyl-CoA thioesterase II	0.0906588
amino acid permease	0.0905385
ATP-dependent RNA helicase HrpA	0.0894901
Kdo(2)-lipid A phosphotransferase	0.0889917
fimbrial chaperone	0.0889917
Fe-S cluster assembly protein SufD	0.0884761
anaerobic sulfatase maturase	0.088459
TVP38/TMEM64 family protein	0.0880293
DUF3987 domain-containing protein	0.0879262
alpha2-macroglobulin	0.0873934
two-component system sensor histidine kinase KdbD	0.0871012
inorganic phosphate transporter PitB	0.0871012
Lon protease	0.0869637
transporter	0.086156
ATP-binding cassette domain-containing protein	0.0856404
efflux RND transporter permease subunit	0.0856232
molecular chaperone	0.0855372
7-alpha-hydroxysteroid dehydrogenase	0.0854341
IS2 element protein InsA	0.0854341
UDP-N-acetylglucosamine--undecaprenyl-phosphate N-acetylglucosaminephosphotransferase	0.084592
WGR and DUF4132 domain-containing protein	0.0844029
ATP-dependent helicase	0.0838186
glycosyltransferase family 4 protein	0.0833546
6-phospho-beta-glucosidase	0.0821343
DUF968 domain-containing protein	0.082014
D-serine ammonia-lyase	0.081825
restriction endonuclease subunit S	0.0814469
lipoprotein	0.0804329
peptidoglycan DD-metalloendopeptidase family protein	0.0798141
GNAT family N-acetyltransferase	0.0780267
sensory histidine kinase DcuS	0.0779924
HNH endonuclease	0.0773221
enhanced serine sensitivity protein SseB	0.0754144
DUF2773 domain-containing bactofilin	0.0751738
aldehyde dehydrogenase	0.0741426
zinc-binding dehydrogenase	0.0732661
chaperone protein DnaK	0.0727505
DNA topoisomerase 1	0.071874
LPS O-antigen length regulator	0.0713412
ribonuclease HI	0.0712553
cyclic di-GMP phosphodiesterase	0.0710146
multidrug efflux RND transporter permease subunit MdtC	0.0708084
shikimate transporter	0.070774
ABC transporter substrate-binding protein	0.0706537
N-acetyltransferase	0.0705506
adenine-specific DNA-methyltransferase	0.0701381
DUF1266 domain-containing protein	0.0700866
sugar ABC transporter ATP-binding protein	0.0700006
NCS2 family permease	0.069846
PstS family phosphate ABC transporter substrate-binding protein	0.0698116
envelope biogenesis factor ElyC	0.0695022
ATP-dependent RNA helicase RhlB	0.0693476
1,4-alpha-glucan branching enzyme	0.0692272
2,3-bisphosphoglycerate-independent phosphoglycerate mutase	0.0691757
membrane-bound lytic murein transglycosylase MltF	0.0690898
IS1 protein InsB	0.068746
murein hydrolase activator NlpD	0.0687117
subunit of E1(0) component of 2-oxoglutarate dehydrogenase	0.0685913
50S ribosomal subunit protein L3	0.068557
transcriptional repressor	0.0685398
cell division protein DamX	0.0684023
acetyl-CoA carboxyltransferase subunit alpha	0.0684023
pseudouridine-5'-phosphate glycosidase	0.0683679
CDP-diacylglycerol diphosphatase	0.0681961
YgcG family protein	0.0681789
two-component regulatory system sensor histidine kinase BtsS	0.0681101
4-alpha-glucanotransferase	0.0678351
DNA helicase IV	0.0675945
lytic transglycosylase domain-containing protein	0.067457
ATP-dependent RNA helicase SrmB	0.0674055
oligopeptide ABC transporter substrate-binding protein OppA	0.0673024
L-glutamine ABC transporter periplasmic binding protein	0.0672164
6-phosphofructokinase I	0.0669414
autotransporter assembly complex protein TamB	0.0668211
intermembrane transport protein PqiB	0.0668211
glutathione-dependent formaldehyde dehydrogenase	0.0666665
DNA-binding transcriptional regulator HexR	0.0666149
YjiK family protein	0.066254
dihydroxy-acid dehydratase	0.0657384
tail fiber assembly protein	0.0656868
UDP-N-acetyl-D-mannosamine dehydrogenase	0.0653775
enterobactin non-ribosomal peptide synthetase EntF	0.0652572
DNA-binding transcriptional activator EvgA	0.06524
type VI secretion system tip protein VgrG	0.0652056
IS4-like element IS421 family transposase	0.0651712
EamA family transporter	0.0650166
3-octaprenyl-4-hydroxybenzoate decarboxylase	0.0649994
acyltransferase	0.0648619
3-mercaptopyruvate sulfurtransferase	0.0646385
pentapeptide repeat-containing protein	0.0644494
transcriptional regulator RcsA	0.0643635
uroporphyrinogen-III C-methyltransferase	0.0641572
terminase small subunit	0.0640197
L-rhamnose/proton symporter RhaT	0.0637448
N-methyl-L-tryptophan oxidase	0.0636932
methylglyoxal reductase YeaE	0.0635041
DUF262 domain-containing protein	0.063487
microcin C ABC transporter permease YejB	0.0634182
cytochrome c peroxidase	0.0633838
acid phosphatase AphA	0.0632807
putative phosphatidylethanolamine synthesis regulator GnsA	0.0629885
DUF1202 family protein	0.0626276
alkaline phosphatase	0.0625073
glycoside hydrolase family 25 protein	0.0623011
lysophospholipid transporter LplT	0.0619574
fatty acyl-AMP ligase	0.0617683
FAD-dependent oxidoreductase	0.0614933
lipid IV(A) 4-amino-4-deoxy-L-arabinosyltransferase	0.061373
DUF1190 domain-containing protein	0.0608918
anaerobic C4-dicarboxylate transporter DcuC	0.0608918
malate dehydrogenase	0.0608918
flagellar type III secretion system pore protein FliP	0.0608402
acid shock protein	0.0607543
peptidoglycan DD-endopeptidase MepH	0.0607027
carbamoyltransferase HypF	0.0606684
ADP-sugar pyrophosphatase	0.0605996
LysE family transporter	0.0605653
poly-beta-1,6 N-acetyl-D-glucosamine synthase	0.0604621
deferrochelatase/peroxidase EfeB	0.0604449
putative protein YneK	0.0602215
5-amino-6-(5-phospho-D-ribitylamino)uracil phosphatase	0.0599122
galactoside O-acetyltransferase	0.0598778
NADP(+)-dependent glucose-6-phosphate dehydrogenase	0.0598778
3-deoxy-7-phosphoheptulonate synthase AroH	0.059809
autotransporter YejO	0.0597403
porin	0.0597231
permease	0.0594653
DNA primase	0.059156
DUF1983 domain-containing protein	0.05907
prepilin peptidase	0.0588982
terminase	0.0587779
sensory histidine kinase PhoR	0.0585544
peptidase	0.0585372
Ail/Lom family outer membrane beta-barrel protein	0.0585372
phage minor tail protein L	0.0581248
preprotein translocase subunit SecA	0.0581076
carbohydrate porin	0.0580045
DNA polymerase III subunit tau	0.0577295
class 1b ribonucleoside-diphosphate reductase subunit alpha	0.0577295
YccE family protein	0.0576607
L-galactonate oxidoreductase	0.0576607
multidrug efflux pump RND permease AcrD	0.0574373
DEAD/DEAH box helicase	0.0572483
D-gluconate kinase, thermostable	0.0570076
bifunctional alpha/beta hydrolase/class I SAM-dependent methyltransferase	0.056492
oligosaccharide MFS transporter	0.0564233
deubiquitinase	0.0562686
sugar kinase	0.0560968
DUF805 domain-containing protein	0.0560452
DUF2542 domain-containing protein YeiS	0.0558905
DeoR/GlpR transcriptional regulator	0.0556327
intracellular growth attenuator protein IgaA	0.0555468
glutamate synthase subunit GltB	0.0555296
undecaprenyl-phosphate glucose phosphotransferase	0.0551515
DEAD/DEAH box helicase family protein	0.0551343
HTH-type transcriptional regulator MurR	0.0551171
PTS ascorbate transporter subunit IIC	0.0545672
DUF3440 domain-containing protein	0.0545328
dGTPase	0.0542062
fumarase A	0.054
adhesin	0.0539141
DNA-binding transcriptional dual regulator CysB	0.0537422
(flavodoxin) oxidoreductase	0.053725
medium-chain fatty-acid--CoA ligase	0.0536047
putative transporter YeaV	0.0536047
sel1 repeat family protein	0.0534157
colanic acid biosynthesis glycosyltransferase WcaE	0.0533469
putative DNA-binding transcriptional regulator of maltose metabolism	0.0533297
glutamate/aspartate ABC transporter membrane subunit GltJ	0.0528657
substrate-binding domain-containing protein	0.0527798
DNA topoisomerase III	0.0527626
integrase arm-type DNA-binding domain-containing protein	0.0526423
IS4 family transposase	0.0526251
L-threonine exporter	0.0524017
antitermination protein	0.0523845
potassium-transporting ATPase subunit KdpB	0.0523329
colanic acid biosynthesis fucosyltransferase WcaI	0.0522298
SASA family carbohydrate esterase	0.0520751
transcription elongation factor GreB	0.0520064
lipopolysaccharide 3-alpha-galactosyltransferase	0.0518345
3-hydroxyacyl-CoA dehydrogenase PaaC	0.0518173
aldehyde-alcohol dehydrogenase	0.0518001
aminopeptidase	0.0516283
AIDA-I family autotransporter adhesin YfaL/EhaC	0.0516111
chorismate synthase	0.0514736
transporter MelB	0.0514564
enterobacterial common antigen polysaccharide co-polymerase	0.0514048
cell envelope integrity protein CreD	0.0513361
aspartate-semialdehyde dehydrogenase	0.0512158
PAS domain-containing protein	0.0511299
sensor histidine kinase	0.0508721
transcriptional regulator ExuR	0.0508377
C40 family peptidase	0.0507518
nucleoside-specific channel-forming protein Tsx	0.0504768
DUF2645 family protein	0.0502877
sucrose phosphorylase	0.0501502
signal recognition particle-docking protein FtsY	0.0500643
sugar ABC transporter substrate-binding protein	0.0500127
TonB-dependent receptor	0.0499784
c-di-GMP phosphodiesterase PdeC	0.0498581
SopA family protein	0.0495831
DUF488 domain-containing protein	0.0495659
class I SAM-dependent methyltransferase	0.0494971
ATPase RavA	0.0494284
lipopolysaccharide core heptose(II) kinase RfaY	0.0494284
YiiG family protein	0.049394
ornithine decarboxylase	0.0493768
O-antigen ligase	0.0493596
anaerobic C4-dicarboxylate transporter DcuB	0.0491362
DNA polymerase I	0.0490503
bifunctional acetaldehyde-CoA/alcohol dehydrogenase	0.0490331
S- and N-oxide reductase subunit A	0.0489128
phosphatidylglycerol--membrane-oligosaccharide glycerophosphotransferase	0.0488612
replicative DNA helicase	0.0488097
IS66 family transposase	0.0487581
IS110-like element IS621 family transposase	0.0487066
two-component system sensor histidine kinase RcsC	0.0485863
DUF1471 domain-containing protein	0.0484659
transcriptional regulator ChbR	0.0484316
1-deoxy-D-xylulose-5-phosphate synthase	0.0484316
nitrate reductase subunit beta	0.0482941
molybdopterin-dependent oxidoreductase Mo/Fe-S-binding subunit	0.0482597
periplasmic serine endoprotease	0.0482082
4-hydroxy-tetrahydrodipicolinate synthase	0.048191
uracil/xanthine transporter	0.0481222
protein required for succinyl modification of osmoregulated periplasmic glucans	0.0479504
long-chain-fatty-acid--CoA ligase FadD	0.0479332
putative colanic acid polymerase	0.0478988
leucine-rich repeat domain-containing protein	0.0478816
aspartate ammonia-lyase	0.0478472
lipopolysaccharide core heptosyltransferase RfaQ	0.0477097
peptidoglycan DD-transpeptidase MrdA	0.0476926
DNA-binding transcriptional dual regulator GadW	0.0476582
galactarate/glucarate/glycerate transporter GarP	0.0474519
transposase, partial	0.0474348
lysine decarboxylase 2	0.0474176
putative transporter YbiR	0.0473832
lactose permease	0.0472973
VWA domain-containing protein	0.0471254
transglycosylase SLT domain-containing protein	0.0470567
cyclic-guanylate-specific phosphodiesterase PdeF	0.0469707
nicotinate-nucleotide--dimethylbenzimidazole phosphoribosyltransferase	0.0469707
fused DNA-binding transcriptional repressor/proline dehydrogenase/1-pyrroline-5-carboxylate dehydrogenase PutA	0.0468332
tetratricopeptide repeat protein	0.0468332
glycine betaine/L-proline ABC transporter ATP-binding protein ProV	0.0467129
cell envelope integrity protein TolA	0.0466957
amino acid ABC transporter ATP-binding protein	0.0466098
D-alanyl-D-alanine-carboxypeptidase/endopeptidase AmpH	0.0465926
spermidine/putrescine ABC transporter ATP-binding protein PotA	0.0465926
formate dehydrogenase-N subunit alpha	0.0465239
transcription termination/antitermination protein NusA	0.0464379
glutamate--tRNA ligase	0.0464379
1-acylglycerol-3-phosphate O-acyltransferase	0.0464208
threonine--tRNA ligase	0.0464208
ATP-dependent chaperone ClpB	0.0464036
methyl-accepting chemotaxis protein	0.046352
class I tRNA ligase family protein	0.046352
bifunctional riboflavin kinase/FAD synthetase	0.0463176
anaerobic glycerol-3-phosphate dehydrogenase subunit C	0.0462833
PTS IIA-like nitrogen regulatory protein PtsN	0.0462833
cytoskeleton protein RodZ	0.0462317
flagellar hook protein FlgE	0.0462317
50S ribosomal subunit protein L5	0.0461801
DUF72 domain-containing protein	0.0461114
trigger factor	0.0461114
50S ribosomal subunit protein L35	0.046077
succinylglutamate desuccinylase	0.0460598
3-hydroxy-acyl-	0.0460598
hydroxyacylglutathione hydrolase GloC	0.0460598
potassium-transporting ATPase subunit KdpA	0.0460083
chemotaxis protein CheA	0.0460083
K(+) transporter TrkH	0.0459911
glutamate-5-semialdehyde dehydrogenase	0.0459223
protein chain elongation factor EF-Ts	0.045888
phosphate starvation-inducible protein PsiF	0.0458708
NAD kinase	0.0458192
ubiquinone biosynthesis accessory factor UbiK	0.0457677
DNA-binding protein StpA	0.0457677
cell division protein FtsN	0.0457505
chromosome partitioning protein MukB	0.0456989
flavodoxin 2	0.0456989
SDR family oxidoreductase	0.0456817
putative nucleoid-associated protein YbaB	0.0456474
hemolysin D (plasmid)	0.045613
enterobactin exporter EntS	0.0455958
transcriptional regulator CsgD	0.0455442
DNA-binding transcriptional dual regulator Fis	0.0455442
multidrug efflux pump RND permease AcrB	0.0454927
50S ribosomal subunit protein L12	0.0454927
histidine--tRNA ligase	0.0454411
ROK family protein	0.0453552
ATP-dependent DNA helicase	0.0453552
D-alanyl-D-alanine carboxypeptidase DacA	0.0452693
membrane-bound lytic murein transglycosylase C	0.0451661
4Fe-4S binding protein	0.0451146
oxidoreductase MdaB	0.0449771
L-fucose mutarotase	0.0449255
lipopolysaccharide core biosynthesis protein WaaQ	0.0449083
fatty acid biosynthesis protein FabY	0.0449083
YdcF family protein	0.044874
kdo(2)-lipid A phosphoethanolamine 7''-transferase	0.044874
cellulose biosynthesis protein BcsG	0.0448568
PTS sugar transporter subunit IIC	0.0447537
DNA recombination protein RmuC	0.0447365
PF13993 family protein YccJ	0.0447193
2-keto-3-deoxygluconate permease	0.0446677
sulfate adenylyltransferase subunit 2	0.0446505
hydrogenase 2 iron-sulfur protein	0.0446505
AMP nucleosidase	0.0446162
putative colanic acid biosynthesis glycosyl transferase	0.0445818
methionine aminopeptidase	0.0445818
DUF350 domain-containing protein	0.0445131
toxic metabolite efflux MATE transporter YeeO	0.0444959
isovaleryl-CoA dehydrogenase	0.0444615
maltodextrin glucosidase	0.0441865
symporter ProP	0.0441521
oxalyl-CoA decarboxylase	0.0441349
DNA-binding transcriptional regulator RstA	0.0441178
putative transporter YccS	0.0440662
esterase YqiA	0.0440662
NAD(P)/FAD-dependent oxidoreductase	0.044049
PTS enzyme I	0.044049
DNA-binding transcriptional dual regulator PhoP	0.0439803
pyrBI operon leader peptide	0.0439459
murein tripeptide ABC transporter substrate-binding protein MppA	0.0439115
PF04712 family membrane protein YohK	0.0438943
autotransporter barrel domain-containing lipoprotein	0.0438943
ribose-5-phosphate isomerase A	0.0438772
putative DNA-binding transcriptional regulator YfhH	0.0438428
O-antigen ligase family protein	0.0438256
leucine--tRNA ligase	0.0437568
mannose-1-phosphate guanyltransferase	0.0437568
MBL fold metallo-hydrolase	0.0436709
putative membrane protein YoaK	0.0436194
T3SS secreted effector EspN	0.0435506
periplasmic trehalase	0.0434819
Mg(2(+)) importing P-type ATPase	0.0434647
DUF1076 domain-containing protein	0.0434475
periplasmic protein CpxP	0.0434475
glucuronide transporter	0.0432928
putative ABC transporter membrane subunit YadH	0.0432584
propionate--CoA ligase	0.0432584
spermidine preferential ABC transporter periplasmic binding protein	0.0432413
D-erythrose-4-phosphate dehydrogenase	0.0432069
p-aminobenzoyl-glutamate transporter	0.0431381
mannose-specific PTS enzyme IID component	0.0431209
dimethyl sulfoxide reductase subunit B	0.0430694
5'-deoxynucleotidase	0.0430522
YjfK family protein	0.0429663
putative colanic biosynthesis glycosyl transferase	0.0429147
NAD(P)H-dependent oxidoreductase	0.0428631
HdeA monomer, chaperone active form	0.0428116
regulator of biofilm formation	0.0428116
dipeptide/tripeptide permease DtpC	0.0428116
conserved protein YdgA	0.0427772
phage terminase small subunit	0.04276
beta-ketoacyl-	0.0427428
regulator of CsrB and CsrC decay	0.0426741
aconitase	0.0426225
DNA recombination protein	0.0425882
OmpA family protein	0.0425538
DNA replication terminus site-binding protein	0.0425538
ribosome-associated ATPase/putative transporter RbbA	0.0425194
ATP-dependent RNA helicase DbpA	0.0424507
RNA 2'-phosphotransferase	0.0424507
YeaH/YhbH family protein	0.0424163
dibenzothiophene desulfurase	0.0424163
N-acetylneuraminate epimerase	0.0423476
peptide ABC transporter substrate-binding protein SapA	0.042296
DUF2877 domain-containing protein	0.0422444
lysine--tRNA ligase/Ap4A synthetase/Ap3A synthetase	0.0422272
toxin of the GhoTS toxin-antitoxin system	0.0420726
RNase II	0.0420382
asparagine synthetase B	0.0420038
4-acetamido-4,6-dideoxy-D-galactose transferase	0.0419694
2,3-dihydroxybenzoate-AMP ligase	0.0418663
cardiolipin synthase C	0.0418663
D-allose ABC transporter periplasmic binding protein	0.0418491
poly-beta-1,6-N-acetyl-D-glucosamine biosynthesis protein PgaD	0.0417288
peptidoglycan DD-transpeptidase FtsI	0.0416601
type II toxin-antitoxin system HipA family toxin	0.0416085
acetyltransferase	0.0415913
T3SS structure protein EscU	0.041557
putative selenate reductase subunit YgfK	0.0414882
DUF977 family protein	0.0414539
colanic acid biosynthesis phosphomannomutase CpsG	0.0414367
sensor domain-containing phosphodiesterase	0.0413679
IclR family transcriptional regulator	0.0413335
high-affinity Fe2+/Pb2+ permease	0.0412304
tRNA(Met) cytidine acetyltransferase	0.0412304
methylated-DNA--	0.0412132
putative xanthine dehydrogenase FAD-binding subunit XdhB	0.0411617
Mal regulon transcriptional regulator MalI	0.0411445
flagellar filament capping protein FliD	0.0410586
putative semialdehyde dehydrogenase Usg	0.0409898
pitrilysin	0.0409554
3'-5' exoribonuclease	0.0409039
acetolactate synthase/acetohydroxybutanoate synthase, regulatory subunit	0.0408867
2-ketobutyrate formate-lyase/pyruvate formate-lyase	0.0408695
phage minor tail protein	0.0408523
PTS mannose/fructose/sorbose transporter family subunit IID	0.0406805
acetylornithine deacetylase	0.0406117
histidine ABC transporter periplasmic binding protein	0.0405602
DNA gyrase subunit A	0.0404399
protein kinase YegI	0.0403883
lysozyme inhibitor LprI family protein	0.0402852
oxidoreductase DsbA	0.040268
DNA-binding transcriptional activator TdcR	0.0402508
transcriptional regulator SdiA	0.0401992
phage tail assembly protein	0.0401821
DUF945 family protein	0.0401649
tRNA cytosine(34) acetyltransferase TmcA	0.0400961
DUF3596 domain-containing protein	0.0400446
IS200/IS605 family transposase	0.0400102
motility protein B	0.0399758
fused putative DNA-binding transcriptional regulator/putative aminotransferase YdcR	0.0399414
autoinducer 2 exporter	0.0398383
phosphoenolpyruvate--protein phosphotransferase	0.0397008
type I restriction-modification system subunit M	0.0396493
tetraacyldisaccharide 4'-kinase	0.0396321
tail protein	0.0396321
anion permease	0.0395977
biotin carboxylase	0.0395805
amino acid ABC transporter permease	0.039443
two-component system sensor histidine kinase CreC	0.0393915
capsule biosynthesis GfcC family protein	0.0393227
MASE1 family protein	0.0393055
low affinity tryptophan permease TnaB	0.0392884
putative allantoin permease	0.0392712
16S rRNA m(3)U1498 methyltransferase	0.0392196
putative transporter YdhP	0.039168
beta-barrel assembly-enhancing protease	0.0390477
dihydroorotate dehydrogenase, type 2	0.0390306
response regulator transcription factor	0.0389962
Cu(+)/Ag(+) efflux RND transporter permease subunit CusA	0.0388931
type III secretion protein	0.0388759
lysine/arginine/ornithine ABC transporter periplasmic binding protein	0.0388759
type 1 fimbria regulatory protein FimB	0.0388587
PF04293 family protein YcgB	0.0388415
ABC transporter family protein MdlA	0.0388243
alanine racemase 1	0.0388071
MarR family transcriptional regulator	0.0387899
inovirus Gp2 family protein	0.0387384
YifB family Mg chelatase-like AAA ATPase	0.0387212
cystine ABC transporter substrate-binding protein	0.0387212
RNase G	0.0386696
poly-beta-1,6-N-acetyl-D-glucosamine N-deacetylase PgaB	0.0386353
ribosome-dependent mRNA interferase toxin HigB	0.0385837
methyl-accepting chemotaxis protein III	0.0385493
acetate--CoA ligase	0.0385321
iron-sulfur cluster-binding protein	0.0384118
phage repressor protein CI	0.0384118
phage major capsid protein	0.0383947
putrescine-ornithine antiporter	0.0383775
autoinducer-2 kinase	0.0383775
D-allose ABC transporter ATP-binding protein AlsA	0.0383431
hydrolase	0.0382572
2-succinyl-5-enolpyruvyl-6-hydroxy-3-cyclohexene-1-carboxylic-acid synthase	0.0382228
2-methylcitrate dehydratase	0.0381884
sensory histidine kinase ArcB	0.038154
6-phospho-beta-glucosidase AscB	0.0381197
selenide, water dikinase	0.0380853
DUF4153 domain-containing protein	0.0380681
type I-E CRISPR-associated protein Cas7/Cse4/CasC	0.0380509
alpha,alpha-trehalose-phosphate synthase	0.0380337
cardiolipin synthase A	0.0380166
PTS sugar transporter subunit IIB	0.0379994
aconitate hydratase 1	0.0379822
anthranilate synthase component I	0.037965
TRAP transporter substrate-binding protein	0.0378619
PRD domain-containing protein	0.0377244
UDP-N-acetylglucosamine 2-epimerase	0.0377244
ubiquinone biosynthesis protein UbiB	0.0376556
evolved beta-D-galactosidase subunit alpha	0.0376041
YbjP/YqhG family protein	0.0375697
YebC/PmpR family DNA-binding transcriptional regulator	0.0374838
DotU family type IV/VI secretion system protein	0.0374838
ethanolamine utilization cob(I)yrinic acid a,c-diamide adenosyltransferase EutT	0.0374322
serine-type D-Ala-D-Ala carboxypeptidase	0.0373807
methyl-accepting chemotaxis protein IV	0.0373807
bifunctional metallophosphatase/5'-nucleotidase	0.0373119
O-acetyltransferase WecH	0.0372432
DNA-binding transcriptional repressor AlsR	0.0372088
bacterioferritin-associated ferredoxin	0.0371057
alpha-glucosidase	0.0370885
putative ABC exporter ATP binding subunit	0.0370369
ATPase	0.0369854
esterase	0.0369854
hydroxyacylglutathione hydrolase GloB	0.0369682
molecular chaperone DnaJ	0.036951
glucans biosynthesis protein MdoC	0.036951
copper/silver export system membrane fusion protein	0.0367619
T3SS effector-like protein EspX	0.0367104
conserved inner membrane protein YbhN	0.0365213
signal peptidase II	0.0364182
IS66 family insertion sequence hypothetical protein	0.0363666
fimbrial usher protein YfcU	0.0363323
common pilus major fimbrillin subunit EcpA	0.0362979
putative lipid-binding lipoprotein YceB	0.0362807
winged helix-turn-helix domain-containing protein	0.0362807
FAD-binding phosphodiesterase	0.0362292
epoxyqueuosine reductase	0.036212
nucleoid-associated protein RdgC	0.0361948
3-methyl-adenine DNA glycosylase I, constitutive	0.0361948
CRISPR-associated helicase/endonuclease Cas3	0.0361604
branched chain amino acid/phenylalanine ABC transporter periplasmic binding protein	0.0360573
transcriptional regulator YdeO	0.0360573
type II secretion system ATPase GspE	0.0359198
glycerol-3-phosphate dehydrogenase	0.0359198
fimbrial usher EcpC	0.0356964
type II secretion system protein GspL	0.0356792
DUF3560 domain-containing protein	0.0356448
DUF3289 family protein	0.0356104
hemolysin E	0.0355417
D-glycero-beta-D-manno-heptose 1,7-bisphosphate 7-phosphatase	0.0354214
prophage tail fiber N-terminal domain-containing protein	0.035198
DUF386 domain-containing evolved beta-D-galactosidase subunit beta	0.0351808
potassium transporter TrkG	0.0351636
PTS transporter subunit EIIC	0.0351464
molybdate ABC transporter substrate-binding protein	0.0351292
T3SS structure protein EscR	0.0350605
putative ABC transporter periplasmic binding protein ArtI	0.0350605
C4-dicarboxylic acid transporter	0.0349745
malonic semialdehyde reductase	0.0348886
type I restriction endonuclease subunit R	0.0348886
ribokinase	0.0348199
TetR/AcrR family transcriptional regulator	0.0347339
phage replication protein	0.0346824
quinolinate synthase NadA	0.0346824
protein AmpE	0.0346652
acid resistance putative oxidoreductase YdeP	0.034648
DUF2726 domain-containing protein	0.034648
poly-beta-1,6 N-acetyl-D-glucosamine export porin PgaA	0.0346308
NAD-dependent DNA ligase LigB	0.0345964
aspartate aminotransferase	0.0345793
PTS beta-glucoside transporter subunit IIABC	0.0345449
bifunctional isocitrate dehydrogenase kinase/phosphatase, partial	0.0344246
DUF2207 domain-containing protein	0.0344246
DUF1016 family protein	0.0344246
outer membrane protein	0.0343215
hydrogenase 4 subunit B	0.0343043
ATP-binding protein with possible role in replication	0.0342699
putative pyruvate formate-lyase activating enzyme YbiY	0.0342699
valine--pyruvate aminotransferase	0.0342699
multiple antibiotic resistance transcriptional regulator MarR	0.034184
tetrahydrodipicolinate succinylase	0.034184
DNA-binding transcriptional regulator RcdA	0.0341668
PTS transporter subunit EIIA	0.0341668
peroxyureidoacrylate/ureidoacrylate amidohydrolase RutB	0.034098
septum site-determining protein	0.0339605
YhaC family protein	0.0339434
DUF2058 domain-containing protein YaiL	0.033909
AGE family epimerase/isomerase	0.0338059
anaerobic C4-dicarboxylate transporter	0.0337887
type VI secretion system tube protein Hcp	0.0337715
YdfR family protein	0.0336856
fimbria biosynthesis transcriptional regulator FimZ	0.033634
replication protein	0.0335824
dipeptide ABC transporter ATP binding subunit DppF	0.0335481
YopN/LcrE/InvE/MxiC type III secretion system gatekeeper	0.0334793
peptidase T	0.0334278
multidrug efflux system protein	0.0333418
RNA-directed DNA polymerase	0.0332731
insulinase family protein	0.0332215
cobalamin/cobinamide outer membrane transporter	0.0332043
sigma 54-interacting transcriptional regulator	0.03317
type I-E CRISPR-associated protein Cse1/CasA	0.0331528
peptidoglycan-binding protein	0.0331184
cardiolipin synthase ClsC	0.0330325
iron ABC transporter permease	0.0329637
DNA-binding transcriptional activator TtdR	0.0329465
glucose-1-phosphatase	0.0329465
peptidoglycan DD-endopeptidase MepM	0.0327403
type VI secretion system baseplate subunit TssF	0.0327403
16S rRNA 2'-O-ribose C1402 methyltransferase	0.0326887
AsmA family protein	0.0326544
molybdopterin molybdotransferase	0.0325684
glycosyl transferase	0.0324997
portal protein	0.0324309
HlyD family secretion protein	0.0324309
heat shock protein Hsp15	0.0323966
DUF898 family protein	0.0323794
NADH-dependent methylglyoxal reductase	0.0323622
molybdate ABC transporter periplasmic binding protein	0.0322763
L-rhamnose isomerase	0.0322419
DUF3251 domain-containing protein	0.0322419
methionine synthase	0.0321903
DUF5107 domain-containing protein	0.0321731
putrescine ABC transporter permease PotH	0.0321731
T3SS component	0.0321731
aminotransferase class I/II-fold pyridoxal phosphate-dependent enzyme	0.032156
inner membrane protein sensing glucose-6-phosphate	0.032156
beta-galactosidase	0.0321388
flagellar type III secretion system protein FlhB	0.0320528
aconitate hydratase AcnA	0.0320356
DUF1116 domain-containing protein	0.0320356
transcriptional regulator LsrR	0.031881
putative anaerobic sulfatase maturation enzyme YdeM	0.0318638
thiamine ABC transporter periplasmic binding protein	0.0318122
quinolinate synthase	0.0316919
PTS sugar transporter subunit IIA	0.0316232
hypothetical protein pO157p15 (plasmid)	0.031606
enterotoxin	0.031606
polysaccharide deacetylase family protein	0.0314857
selenocysteine synthase	0.0314857
CHASE9 sensor domain-containing protein	0.0314685
type IV secretion protein Rhs	0.0314169
arginine ABC transporter substrate-binding protein	0.0313654
putative periplasmic binding protein SapA	0.0313482
malate dehydrogenase, NAD-requiring	0.0313138
agmatinase	0.0312279
DUF3302 domain-containing protein	0.0311248
site-specific DNA-methyltransferase	0.0311248
threonylcarbamoyl-AMP synthase	0.0310732
LPS export ABC transporter permease LptF	0.0310216
exodeoxyribonuclease VII large subunit	0.0310216
DNA cytosine methyltransferase	0.0309701
L-lysine exporter	0.0309529
colanic acid biosynthesis protein WcaM	0.030867
cystathionine beta-lyase/L-cysteine desulfhydrase	0.0308498
type VI secretion system lipoprotein TssJ	0.0308326
rhomboid family intramembrane serine protease	0.0308326
FAD-binding protein	0.0307638
RNA polymerase sigma factor FecI	0.0307638
thiamine/thiamine pyrophosphate ABC transporter permease ThiP	0.0306951
oxidoreductase DsbB	0.0306779
adenine DNA glycosylase	0.0305748
DUF3592 domain-containing protein	0.0305404
YhcH/YjgK/YiaL family protein	0.0303857
DNA-binding transcriptional dual regulator LysR	0.0303857
DUF2931 family protein	0.0303514
23S rRNA pseudouridine(2604) synthase RluF	0.0303342
phage late control D family protein	0.0302654
histidine kinase	0.0302654
SsrA-binding protein	0.0302483
DUF3491 domain-containing protein	0.0301967
usher protein FimD	0.0301795
YfaQ family protein	0.0301279
IS21 family transposase	0.0301108
xanthosine/proton symporter XapB	0.0300592
glutathione transferase	0.0299389
16S rRNA (uracil(1498)-N(3))-methyltransferase	0.0298701
nitrous oxide-stimulated promoter family protein	0.0298358
anti-FlhDC factor	0.0298358
aliphatic sulfonate ABC transporter substrate-binding protein SsuA	0.0297327
cystine ABC transporter periplasmic binding protein	0.0297327
inverse autotransporter beta domain-containing protein	0.0297155
membrane glycosyltransferase	0.0296983
aldose 1-epimerase	0.0296295
IS186/IS421 transposase	0.029578
outer membrane usher protein	0.0295436
TetR family transcriptional regulator	0.0295436
ParB-like nuclease domain-containing protein	0.0295092
ash family protein	0.029492
sensory histidine kinase RstB	0.0293717
tRNA-dihydrouridine synthase A	0.0292858
EscU/YscU/HrcU family type III secretion system export apparatus switch protein	0.0292342
iron-containing alcohol dehydrogenase	0.0292171
phage major capsid protein, P2 family	0.0291999
Rpn family recombination-promoting nuclease/putative transposase	0.0291827
exodeoxyribonuclease VIII	0.0291655
DNA-binding transcriptional dual regulator GlcC	0.0291311
cell division protein ZapE	0.0291139
trehalose-specific PTS enzyme IIBC component	0.0290796
acid stress response transcriptional regulator YdeO	0.0290108
DeoR family transcriptional regulator	0.0289765
Cu(+)/Ag(+) efflux RND transporter periplasmic metallochaperone CusF	0.0289765
type III secretion system effector E3 ubiquitin ligase NleL	0.0289765
thymidylate kinase	0.0289765
phosphatidylglycerophosphatase C	0.0289593
2',3'-cyclic-nucleotide 2'-phosphodiesterase	0.0289421
type IV conjugative transfer system coupling protein TraD	0.0288905
electron transport complex subunit RsxD	0.0288905
phosphate regulon sensor histidine kinase PhoR	0.0288733
extracellular solute-binding protein	0.0288561
T3SS intimin	0.0288561
cyclic-guanylate-specific phosphodiesterase PdeB	0.028839
phosphatidate cytidylyltransferase	0.0288046
protein YibB	0.0288046
flagellar biosynthetic protein FliR	0.0287874
ribosomal protein S12 methylthiotransferase accessory factor YcaO	0.0287358
6-phospho-beta-glucosidase A	0.0287187
D-alanyl-D-alanine carboxypeptidase DacC	0.0287015
two-component system sensor histidine kinase QseC	0.0286499
PTS fructose transporter subunit IIBC	0.0286327
conjugal transfer protein	0.0286327
oxidoreductase CcmH	0.028564
DUF4434 family protein	0.0285468
cyclic di-GMP phosphodiesterase YliE domain protein	0.0285296
copper/silver export system outer membrane channel	0.0285124
triphosphoribosyl-dephospho-CoA synthase CitG	0.0285124
mannosyl-3-phosphoglycerate phosphatase-related protein	0.0284609
Na+/H+ antiporter	0.0284265
YgiQ family radical SAM protein	0.0284265
sensory histidine kinase CreC	0.0283749
DUF4765 family protein	0.0283749
protein-serine/threonine phosphatase	0.0283749
excisionase	0.0283405
conjugal transfer mating pair stabilization protein TraG	0.0282546
yersiniabactin polyketide synthase HMWP1	0.0282031
glutathione-regulated potassium-efflux system ancillary protein KefG	0.0281687
TDP-N-acetylfucosamine:lipid II N-acetylfucosaminyltransferase	0.0281515
glutathione-disulfide reductase	0.0280656
methionine adenosyltransferase	0.0280484
hypochlorite stress DNA-binding transcriptional regulator HypT	0.0279796
inovirus-type Gp2 protein	0.0279624
type VI secretion system ATPase TssH	0.0279624
DNA-binding transcriptional repressor/NMN adenylyltransferase NadR	0.0279109
DNA-binding transcriptional activator/c-di-GMP phosphodiesterase PdeL	0.0278937
YdgA family protein	0.0278593
exodeoxyribonuclease VII subunit XseA	0.0278078
acyl-CoA dehydrogenase	0.0277562
DNA ligase	0.0277046
NADH-dependent flavin oxidoreductase	0.0276531
DNA topoisomerase IV subunit A	0.0276359
choline BCCT transporter BetT	0.0276359
trehalose-phosphatase	0.0276359
signal recognition particle receptor	0.0276187
UDP-galactose 4-epimerase	0.0276015
hemin ABC transporter substrate-binding protein	0.0275843
T3SS secreted effector NleG	0.0275328
putative acyl-CoA dehydrogenase	0.0275328
hypothetical protein ECs_0454	0.0274984
ankyrin repeat domain-containing protein	0.0274984
nitrate/nitrite two-component system sensor histidine kinase NarX	0.027464
hypothetical protein ECs_2777	0.0274297
carboxylate-amine ligase	0.0273953
Gfo/Idh/MocA family oxidoreductase	0.0273265
23S rRNA m(5)U1939 methyltransferase	0.0272578
YibL family ribosome-associated protein	0.0272406
LacI family transcriptional regulator	0.0272406
ISL3 family transposase	0.0272062
Clp protease ClpP	0.0271375
ribulose-phosphate 3-epimerase	0.0271375
fused 4'-phosphopantothenoylcysteine decarboxylase and phosphopantothenoylcysteine synthetase	0.0271203
SOS response-associated peptidase	0.0271203
aldolase	0.0270859
lipid IVA 4-amino-4-deoxy-L-arabinosyltransferase	0.0270859
3-phosphoshikimate 1-carboxyvinyltransferase	0.0270859
glycosyltransferase family 9 protein	0.0270859
carbohydrate kinase family protein	0.0270516
cysteine desulfuration protein SufE	0.0270172
UTRA domain-containing protein	0.027
autotransporter adhesin Ag43	0.0269828
lipoamide dehydrogenase	0.0269656
16S rRNA m(4)C1402 methyltransferase	0.0269656
low conductance mechanosensitive channel YnaI	0.0269656
YjbH family protein	0.0269656
multidrug resistance outer membrane protein MdtQ	0.0269484
bifunctional ADP-dependent NAD(P)H-hydrate dehydratase/NAD(P)H-hydrate epimerase	0.0269313
fimbrial-like adhesin protein	0.0269313
DUF853 domain-containing protein	0.0269313
arabinose operon transcriptional regulator AraC	0.0269141
putative acyl transferase	0.0268797
PLP-dependent aminotransferase family protein	0.0268625
cytotoxin	0.0268453
cold-shock protein	0.0268453
periplasmic pilin chaperone	0.0268453
acyltransferase family protein	0.0268453
YscQ/HrcQ family type III secretion apparatus protein	0.0268453
PTS 2-O-a-mannosyl-D-glycerate transporter subunit IIABC	0.026725
primosome factor N'	0.026725
curli transport specificity factor	0.026725
protein FxsA	0.0266906
phosphate acetyltransferase	0.0266906
DUF2713 family protein	0.0266391
general secretion pathway protein D	0.0266391
peptidase D	0.0266047
conserved protein YehS	0.0265875
membrane integrity-associated transporter subunit PqiA	0.026536
hydroxyphenylacetyl-CoA thioesterase PaaI	0.0264844
type II secretion system minor pseudopilin GspK	0.0264844
P-type conjugative transfer protein TrbJ	0.0264672
type IV secretion system protein	0.0264672
protein YdcA	0.02645
NAD-binding component of Trk potassium transporters	0.02645
3-oxoacyl-	0.0264157
uridylyltransferase, low activity	0.0263641
electron transport complex subunit RsxC	0.0263125
DNA polymerase III/DNA elongation factor III tau and gamma subunits DnaX	0.0262954
PAAR domain-containing protein	0.0262954
DUF535 domain-containing protein	0.026261
polysaccharide biosynthesis tyrosine autokinase	0.0262266
phage antiterminator	0.0262266
M-antigen undecaprenyl disphosphate flippase	0.0261922
phosphodiesterase YaeI	0.0261751
DUF1889 domain-containing protein YoaC	0.0261407
AIDA repeat-containing protein	0.0261063
protein transport protein HofC	0.0261063
L,D-transpeptidase	0.0260719
PUA-like domain-containing protein YqfB	0.0260547
hypothetical protein ECs_3736	0.0260032
fumarate hydratase	0.025986
glycerophosphoryl diester phosphodiesterase	0.025986
ligase	0.025986
class 1b ribonucleoside-diphosphate reductase subunit beta	0.0258829
tail assembly protein	0.0258829
6-deoxy-6-sulfofructose kinase	0.0258829
sensory histidine kinase NarQ	0.0258657
FMN transferase	0.0258313
O-acetylserine/cysteine exporter	0.0257798
lipoprotein metalloprotease SslE	0.0257798
thiol peroxidase	0.0257282
monooxygenase	0.0257282
DNA-cytosine methyltransferase	0.0256766
stationary phase inducible protein CsiE	0.0256079
bifunctional 23S rRNA (guanine(2069)-N(7))-methyltransferase RlmK/23S rRNA (guanine(2445)-N(2))-methyltransferase RlmL	0.0255907
flagellar biosynthesis protein FlhA	0.025522
replication initiation protein	0.025522
transcription-repair coupling factor	0.025522
DNA topoisomerase (ATP-hydrolyzing) subunit B	0.0254876
DctP family TRAP transporter solute-binding subunit	0.0254876
common pilus major subunit	0.0254704
pheST operon leader peptide PheM	0.0254017
cell division protein ZapA	0.0253845
putative lipoprotein YsaB	0.0253845
anaerobic glycerol-3-phosphate dehydrogenase subunit B	0.0253329
adenylate kinase	0.0252985
DUF5507 domain-containing protein	0.0252985
autoinducer 2 ABC transporter substrate-binding protein LsrB	0.0252814
glycine zipper 2TM domain-containing protein	0.0252642
catalase/peroxidase KatP	0.025247
DUF1266 domain-containing protein YbeR	0.0252126
phosphatidylglycerophosphatase B	0.0252126
partially deacetylated poly-beta-1,6-N-acetyl-D-glucosamine outer membrane porin	0.0251954
CadC family transcriptional regulator	0.0251782
macrolide transporter subunit MacA	0.025161
protein YmcE	0.0251439
hydrogenase 4 subunit D	0.0251267
GDP-mannose 4,6-dehydratase	0.0251267
threonine/homoserine exporter RhtA	0.0251095
glutamate racemase	0.0251095
lymphostatin Efa1/LifA	0.0250923
TolC family protein	0.0250751
radiation resistance protein YbgI	0.0250579
AI-2E family transporter	0.0250407
DNA replication protein DnaC	0.0250236
N-ethylmaleimide reductase	0.0250236
cystathionine beta-lyase	0.0250064
galactosamine-specific PTS enzyme IID component	0.0249548
EspJ family T3SS effector ADP-ribosyltransferase	0.0249548
transcriptional regulator TyrR	0.0249204
ribonucleoside-diphosphate reductase 1 subunit beta	0.0249032
fimbrial-like protein YadL	0.0249032
superoxide dismutase (Mn)	0.0248861
M28 family peptidase	0.0248517
protease 3	0.0248173
23S rRNA m(5)C1962 methyltransferase	0.0247829
N-6 DNA methylase	0.0247658
hypothetical protein ECs_4747	0.0247658
phosphoribosylformylglycinamide synthetase	0.0247486
class II holin family protein	0.0247314
RNA polymerase subunit beta	0.024697
fumarate reductase subunit FrdC	0.024697
diaminopropionate ammonia-lyase	0.024697
diguanylate cyclase DgcP	0.024697
HipA domain-containing protein	0.0246798
dihydropyrimidinase	0.0246798
fimbrial-like adhesin	0.0246626
exodeoxyribonuclease I	0.0246626
glycine betaine ABC transporter substrate-binding protein OsmF	0.0246626
flagellar filament capping protein	0.0246626
diguanylate phosphodiesterase	0.0246455
ribonuclease E	0.0246283
allose kinase	0.0246111
N-acetylmuramic acid 6-phosphate etherase	0.0246111
enterochelin esterase	0.0245939
peptidyl-dipeptidase Dcp	0.0245767
multidrug efflux transporter outer membrane subunit MdtP	0.0245767
septation protein A	0.0245595
glutathione S-transferase family protein	0.0245423
threonine deaminase	0.0245423
multidrug efflux MFS transporter MdtG	0.024508
arginine--tRNA ligase	0.024508
fertility inhibition protein FinO	0.0244908
two-component system sensor histidine kinase RstB	0.0244908
type II toxin-antitoxin system RelE/ParE family toxin	0.0244908
sensory histidine kinase CusS	0.0244392
DUF3362 domain-containing protein	0.0244392
23S rRNA pseudouridine(955/2504/2580) synthase RluC	0.0244392
beta-ketoacyl-ACP synthase III	0.0244392
DNA polymerase II	0.024422
pyruvate formate-lyase activating enzyme	0.0244048
Sec-independent protein translocase subunit TatC	0.0244048
glucuronide uptake porin UidC	0.0244048
putative transport protein AraJ	0.0243705
Y-family DNA polymerase	0.0243533
cellulose biosynthesis regulator YedQ	0.0243361
peptide deformylase	0.0243361
cellulose biosynthesis cyclic di-GMP-binding regulatory protein BcsB	0.0243189
hemolysin activator-related protein	0.0243017
glycine betaine ABC transporter permease YehY	0.0242502
ATP-dependent Clp protease ATP-binding subunit ClpA	0.0242502
amidophosphoribosyltransferase	0.024233
propionate kinase	0.0242158
YfdX family protein	0.0242158
YnfC family lipoprotein	0.0241986
multidrug efflux RND transporter subunit MdtA	0.0241814
cellulose biosynthesis protein BcsC	0.0241814
FUSC family protein	0.024147
glutathione ABC transporter permease GsiD	0.024147
oligopeptidase B	0.0241299
DNA polymerase III subunit alpha	0.0241127
hypothetical protein, partial	0.0240783
putative colanic acid biosynthesis pyruvyl transferase	0.0240439
hemolysin B (plasmid)	0.0240439
IS30 transposase	0.0240096
putative transporter	0.0239924
host cell division inhibitor Icd-like protein	0.0239924
L-asparaginase 2	0.0239752
Fe-S cluster scaffold complex subunit SufB	0.0239752
dihydroorotase	0.0239752
sugar efflux transporter SetB	0.023958
putative anti-terminator regulatory protein	0.023958
uracil phosphoribosyltransferase	0.0239408
L-asparagine permease	0.0239408
acetyl-CoA acetyltransferase	0.0239408
proline--tRNA ligase	0.0239236
dimethylsulfoxide reductase subunit B	0.0239236
cellulase	0.0239236
excisionase family protein	0.0239064
fumarate reductase (quinol) flavoprotein subunit	0.0239064
isocitrate lyase	0.0239064
oxidative damage protection protein	0.0238892
cell division protein ZapD	0.0238892
GTP diphosphokinase	0.0238721
tRNA (adenosine(37)-N6)-dimethylallyltransferase MiaA	0.0238549
excinuclease ABC subunit UvrC	0.0238549
MHS family MFS transporter	0.0238377
isopentenyl-diphosphate Delta-isomerase	0.0238377
cysteine/glutathione ABC transporter permease/ATP-binding protein CydD	0.0238033
YbjN domain-containing protein	0.0238033
iron-enterobactin ABC transporter ATP-binding protein	0.0237861
acyl-CoA synthetase FdrA	0.0237861
glyceraldehyde-3-phosphate dehydrogenase A	0.0237861
formate hydrogenlyase subunit HycF	0.0237689
phage shock protein PspA	0.0237689
MgtC/SapB family protein	0.0237689
type IV secretory system conjugative DNA transfer family protein	0.0237518
nitrate transporter NarK	0.0237518
primary-amine oxidase	0.0237518
2-oxoglutarate dehydrogenase complex dihydrolipoyllysine-residue succinyltransferase	0.0237346
T3SS secreted effector NleB	0.0237346
serine protease inhibitor ecotin	0.0237174
enterobactin synthase subunit EntD	0.0237174
penicillin-insensitive murein endopeptidase	0.0237174
putative 4Fe-4S membrane protein	0.0237174
formate hydrogenlyase subunit HycG	0.0237174
peptidoglycan glycosyltransferase/peptidoglycan DD-transpeptidase MrcA	0.023683
mal regulon transcriptional regulator MalI	0.023683
glycerol kinase GlpK	0.0236658
N-acetylglucosamine-6-phosphate deacetylase	0.0236486
hypothetical protein ECs_2840	0.0236486
DNA mismatch repair endonuclease MutL	0.0236314
DUF3313 domain-containing protein	0.0236143
protein HtrL	0.0235971
YtfJ family protein	0.0235971
HTH-type transcriptional regulator MalT	0.0235971
DNA-binding transcriptional regulator CecR	0.0235799
quinol oxidase subunit	0.0235799
iron-siderophore ABC transporter substrate-binding protein	0.0235799
glycerol-3-phosphate transporter	0.0235799
putative transporter YifK	0.0235627
type VI secretion system protein TssA	0.0235627
bifunctional nicotinamidase/pyrazinamidase	0.0235627
bifunctional isocitrate dehydrogenase kinase/phosphatase	0.0235627
bifunctional UDP-N-acetylglucosamine diphosphorylase/glucosamine-1-phosphate N-acetyltransferase GlmU	0.0235627
bifunctional UDP-4-amino-4-deoxy-L-arabinose formyltransferase/UDP-glucuronic acid oxidase ArnA	0.0235627
protease	0.0235455
HTH-type transcriptional activator AllS	0.0235455
PTS trehalose transporter subunit IIBC	0.0235455
clamp-binding protein CrfC	0.0235455
UvrY/SirA/GacA family response regulator transcription factor	0.0235283
GTP-binding protein	0.0235111
DUF1202 domain-containing protein YggM	0.023494
phosphate acyltransferase	0.0234768
isopentenyl-adenosine A37 tRNA methylthiolase	0.0234768
DUF5384 family protein	0.0234768
zinc-binding alcohol dehydrogenase family protein	0.0234596
thiosulfate sulfurtransferase PspE	0.0234596
diaminopimelate decarboxylase	0.0234424
crotonobetaine/carnitine-CoA ligase	0.0234424
dephospho-CoA kinase	0.0234252
diaminopimelate epimerase	0.0234252
aminomethyl-transferring glycine dehydrogenase	0.0234252
YiiQ family protein	0.0234252
polyribonucleotide nucleotidyltransferase	0.0234252
fatty acid oxidation complex subunit alpha FadB	0.0234252
serine hydroxymethyltransferase	0.0234252
4-amino-4-deoxy-L-arabinose-phosphoundecaprenol flippase subunit ArnF	0.023408
flagellar basal body P-ring protein FlgI	0.023408
YceI family protein	0.0233736
LPS assembly protein LptD	0.0233736
thymidine phosphorylase	0.0233736
putative lateral flagellar export/assembly protein LafU	0.0233736
flagellar basal body P-ring formation protein FlgA	0.0233736
imidazole glycerol phosphate synthase subunit HisF	0.0233565
type II toxin-antitoxin system antitoxin HipB	0.0233393
flhB HrpN YscU SpaS family protein	0.0233393
signal recognition particle protein component	0.0233393
sugar phosphorylase	0.0233393
DNA polymerase IV	0.0233393
PTS mannitol transporter subunit IICB	0.0233393
L-glyceraldehyde 3-phosphate reductase	0.0233221
high-affinity branched-chain amino acid ABC transporter substrate-binding protein LivK	0.0233221
tRNA 2-thiouridine(34) synthase MnmA	0.0233049
glucose-6-phosphate isomerase	0.0233049
GMP reductase	0.0233049
relaxosome protein TraM	0.0233049
galactokinase	0.0232877
glucokinase	0.0232877
nicotinate phosphoribosyltransferase	0.0232877
periplasmic nitrate reductase subunit alpha	0.0232705
LPS 1,2-glucosyltransferase	0.0232705
tyrosine recombinase XerC	0.0232705
bifunctional glycosyl transferase/transpeptidase	0.0232705
glutaminase A	0.0232705
transferase	0.0232533
chromosomal replication initiator protein DnaA	0.0232533
putrescine aminotransferase	0.0232533
dUTP diphosphatase	0.0232533
PTS glucose transporter subunit IIA	0.0232362
ribose ABC transporter substrate-binding protein RbsB	0.0232362
colicin V production protein	0.0232362
phosphoenolpyruvate carboxylase	0.0232362
RpoE-regulated lipoprotein	0.0232362
bifunctional phosphoribosyl-AMP cyclohydrolase/phosphoribosyl-ATP diphosphatase HisIE	0.0232362
inosine/guanosine kinase	0.023219
excinuclease ABC subunit UvrA	0.023219
NADP-dependent phosphogluconate dehydrogenase	0.023219
sucrose operon repressor	0.023219
class I adenylate cyclase	0.023219
catecholate siderophore receptor CirA	0.023219
lytic murein transglycosylase B	0.0232018
deoxyribonuclease I	0.0232018
elongation factor P-like protein YeiP	0.0232018
UDP-4-amino-4-deoxy-L-arabinose aminotransferase	0.0232018
bifunctional protein-disulfide isomerase/oxidoreductase DsbC	0.0232018
ATP-dependent protease ATP-binding subunit ClpX	0.0232018
membrane-bound lytic murein transglycosylase A	0.0232018
miniconductance mechanosensitive channel MscM	0.0231846
23S rRNA pseudouridine(2457) synthase RluE	0.0231846
RNA ligase RtcB family protein	0.0231846
cyd operon protein YbgE	0.0231846
LexA family transcriptional regulator	0.0231674
nucleoside triphosphate pyrophosphohydrolase	0.0231674
histidine phosphatase family protein	0.0231674
murein transglycosylase D	0.0231674
DUF1175 domain-containing protein	0.0231674
succinate dehydrogenase cytochrome b556 subunit	0.0231674
lipoprotein NlpI	0.0231674
G/U mismatch-specific DNA glycosylase	0.0231674
phage repressor protein	0.0231674
membrane protein insertase YidC	0.0231502
carboxy terminal-processing peptidase	0.0231502
30S ribosomal subunit protein S19	0.0231502
osmotically-inducible lipoprotein OsmE	0.0231502
ferrochelatase	0.0231502
anaerobic nitric oxide reductase flavorubredoxin	0.0231502
glutamyl-tRNA reductase	0.0231502
ATP synthase F1 complex subunit beta	0.0231502
PTS N-acetyl glucosamine transporter subunit IIABC	0.0231502
aspartate--tRNA ligase	0.0231502
heat shock chaperone IbpA	0.023133
ribosome-dependent GTPase TypA	0.023133
pantetheine-phosphate adenylyltransferase	0.023133
chaperonin GroEL	0.023133
glycine--tRNA ligase subunit beta	0.023133
formyltetrahydrofolate deformylase	0.023133
elongation factor G	0.023133
triose-phosphate isomerase	0.023133
phenylalanine--tRNA ligase subunit alpha	0.023133
pyruvate dehydrogenase (acetyl-transferring), homodimeric type	0.023133
glycerol-3-phosphate 1-O-acyltransferase PlsB	0.023133
curved DNA-binding protein	0.023133
50S ribosomal subunit protein L14	0.023133
50S ribosomal subunit protein L2	0.023133
30S ribosomal subunit protein S11	0.023133
30S ribosomal protein S7	0.023133
phosphoribosylaminoimidazolesuccinocarboxamide synthase	0.0231159
putrescine ABC transporter periplasmic putrescine-binding protein	0.0231159
protein chain elongation factor EF-P	0.0231159
50S ribosomal subunit protein L20	0.0231159
multidrug efflux MFS transporter Bcr	0.0231159
malate synthase A	0.0231159
50S ribosomal subunit protein L23	0.0231159
DNA polymerase III subunit gamma	0.0231159
ribose ABC transporter ATP-binding protein RbsA	0.0231159
multidrug efflux transporter transcriptional repressor AcrR	0.0231159
30S ribosomal subunit protein S1	0.0231159
arabinose-5-phosphate isomerase GutQ	0.0231159
D-ribose pyranase	0.0231159
cell division factor ZapB	0.0230987
NAD-dependent protein deacylase	0.0230987
50S ribosomal subunit protein L33	0.0230987
cysteine desulfurase	0.0230987
glutamate--ammonia ligase	0.0230987
cell division protein FtsX	0.0230987
polyphosphate kinase	0.0230987
LytTR family transcriptional regulator	0.0230987
1,4-dihydroxy-2-naphthoyl-CoA synthase	0.0230815
tRNA-dihydrouridine synthase B	0.0230815
50S ribosomal subunit protein L28	0.0230815
potassium/proton antiporter	0.0230815
outer membrane protein assembly factor BamA	0.0230815
RNA polymerase subunit alpha	0.0230815
RNA polymerase, sigma 32 (sigma H) factor	0.0230643
30S ribosomal protein S3	0.0230643
tRNA-specific 2-thiouridylase	0.0230643
inosine 5'-monophosphate dehydrogenase	0.0230471
carbonic anhydrase 2	0.0230471
DNA-binding transcriptional repressor FabR	0.0230471
NAD-dependent dihydropyrimidine dehydrogenase subunit PreA	0.0230471
D-serine transporter DsdX	0.0230471
5-carboxymethylaminomethyluridine-tRNA synthase subunit MnmG	0.0230299
adenylosuccinate synthetase	0.0230299
2-isopropylmalate synthase	0.0230299
phospho-N-acetylmuramoyl-pentapeptide-transferase	0.0230299
osmotically-inducible lipoprotein OsmB	0.0230127
transcriptional repressor MtlR	0.0230127
RNA polymerase-binding transcription factor DksA	0.0230127
PTS N-acetylgalactosamine transporter subunit IIB	0.0230127
uridine/cytidine kinase	0.0229955
primosomal replication protein N''	0.0229955
zinc ABC transporter ATP-binding protein ZnuC	0.0229955
30S ribosomal subunit protein S15	0.0229955
RNase III	0.0229955
formyl-CoA transferase	0.0229955
glucosamine-6-phosphate deaminase	0.0229784
lipoyl synthase	0.0229784
symporter PlaP	0.0229784
50S ribosomal subunit protein L11	0.0229784
RNA polymerase-associated protein RapA	0.0229784
aminotransferase class III-fold pyridoxal phosphate-dependent enzyme	0.0229612
formate hydrogenlyase transcriptional activator FlhA	0.0229612
chromosome partitioning protein MukF	0.0229612
putative cation transport regulator ChaB	0.0229612
Sec translocon accessory complex subunit YajC	0.022944
Holliday junction branch migration protein RuvA	0.022944
phosphoglucosamine mutase	0.0229268
dynamic cytoskeletal protein MreB	0.0229268
DUF1176 domain-containing protein	0.0229096
nucleotide 5'-monophosphate nucleosidase	0.0228924
D-allose transporter substrate-binding protein	0.0228924
cytochrome bd-I ubiquinol oxidase subunit I	0.0228924
phosphoglycerate kinase	0.0228924
dihydroneopterin triphosphate diphosphatase	0.0228752
50S ribosomal subunit protein L19	0.0228752
(2E,6E)-farnesyl-diphosphate-specific ditrans,polycis-undecaprenyl-diphosphate synthase	0.0228752
taurine ABC transporter ATP-binding subunit	0.0228752
amino acid ABC transporter substrate-binding protein	0.0228581
anaerobic ribonucleoside-triphosphate reductase	0.0228581
ATP synthase F1 complex subunit alpha	0.0228581
hydrogenase-2 assembly chaperone	0.0228581
50S ribosomal subunit protein L4	0.0228581
lysophospholipase L2	0.0228581
DNA-binding transcriptional activator RcsB	0.0228409
ATP synthase Fo complex subunit b	0.0228409
all-trans-octaprenyl-diphosphate synthase	0.0228409
transcriptional regulator TdcA	0.0228409
putative ABC exporter membrane subunit YbhS	0.0228409
thiamine ABC transporter substrate binding subunit	0.0228409
GhoT/OrtT family toxin	0.0228237
lysine--tRNA ligase, constitutive	0.0228237
50S ribosomal subunit protein L31	0.0228237
cell division protein CpoB	0.0228065
transketolase 1	0.0228065
putative RNA-binding protein YciO	0.0228065
elongation factor P family protein	0.0228065
L-Ala-D/L-Glu epimerase	0.0228065
galactose/proton symporter	0.0228065
D-mannonate oxidoreductase	0.0228065
6-phosphofructokinase II	0.0228065
lipoate-protein ligase A	0.0228065
low-affinity gluconate transporter	0.0227721
GPO family capsid scaffolding protein	0.0227721
manganese efflux pump MntP	0.0227549
nitrite reductase catalytic subunit NirB	0.0227549
negative regulator of the pho regulon	0.0227549
PQQ-dependent sugar dehydrogenase	0.0227549
3-deoxy-manno-octulosonate cytidylyltransferase	0.0227549
glycerol kinase	0.0227549
esterase family protein	0.0227377
terminase endonuclease subunit	0.0227377
protein YggL	0.0227377
PLP homeostasis protein	0.0227377
XylR family transcriptional regulator	0.0227206
putative transcriptional regulator YebC	0.0227206
pyrimidine-specific ribonucleoside hydrolase RihA	0.0227034
L-arginine ABC transporter membrane subunit ArtM	0.0227034
symporter NupC	0.0226862
Na/Pi cotransporter family protein	0.0226862
16S rRNA m(2)G966 methyltransferase	0.0226862
acetohydroxy acid synthase I subunit IlvN	0.0226862
AcfC family adhesin Paa	0.022669
conserved protein YjiX	0.022669
ferredoxin-like protein	0.022669
DUF2813 domain-containing protein YbjD	0.022669
fused aspartate kinase/homoserine dehydrogenase 2	0.022669
outer membrane lipoprotein carrier protein	0.0226518
heme lyase CcmF/NrfE family subunit	0.0226518
cystine ABC transporter permease	0.0226518
NADPH-dependent ferric chelate reductase	0.0226346
lipoprotein release complex - inner membrane subunit	0.0226346
peptidyl-prolyl cis-trans isomerase SurA	0.0226346
PTS fructose transporter subunit IIC	0.0226346
flagellar transcriptional regulator FlhC	0.0226174
DNA-binding transcriptional dual regulator CRP	0.0226174
DNA-binding transcriptional repressor PurR	0.0226003
P-loop guanosine triphosphatase	0.0225831
ethanolamine utilization protein EutH	0.0225831
lipoprotein NlpA	0.0225659
DNA utilization protein HofM	0.0225659
nitrate reductase A subunit alpha	0.0225659
zinc ABC transporter periplasmic binding protein	0.0225659
FCD domain-containing protein	0.0225487
efflux MFS transporter YdeE	0.0225487
superoxide dismutase	0.0225487
iron/manganese ABC transporter permease subunit SitD	0.0225487
stationary phase nucleoid protein that sequesters iron and protects DNA from damage	0.0225315
DUF903 domain-containing lipoprotein YgdR	0.0225315
CRISPR-associated endonuclease Cas3''	0.0225315
translesion error-prone DNA polymerase V subunit UmuC	0.0224971
acid stress protein	0.02248
hydratase	0.02248
phosphoethanolamine transferase EptA	0.02248
Tar ligand binding domain-containing protein	0.02248
PF05166 family protein YcgL	0.0224628
o-succinylbenzoate synthase	0.0224628
DNA-binding transcriptional repressor DeoR	0.0224628
multidrug efflux MFS transporter MdtH	0.0224628
30S ribosomal subunit protein S12	0.0224628
cadaverine/lysine antiporter	0.0224628
rhodanese-related sulfurtransferase	0.0224628
DsrE/F sulfur relay family protein YchN	0.0224628
L-fuculokinase	0.0224628
histidinol dehydrogenase	0.0224456
RNA chaperone ProQ	0.0224456
maltose O-acetyltransferase	0.0224456
tRNA dimethylallyltransferase	0.0224456
L-fucose operon activator	0.0224284
DNA repair protein RecR	0.0224284
fructose-6-phosphate aldolase	0.0224284
23S rRNA m(2)A2503 methyltransferase/tRNA m(2)A37 methyltransferase	0.0224112
endonuclease/exonuclease/phosphatase domain-containing protein YafD	0.022394
DNA-binding transcriptional dual regulator CecR	0.022394
phosphoglycolate phosphatase	0.022394
shikimate kinase 1	0.022394
S-(hydroxymethyl)glutathione dehydrogenase	0.0223768
vimentin domain protein	0.0223425
conserved inner membrane protein YfcA	0.0223425
cell division protein DedD	0.0223253
conserved inner membrane protein YicG	0.0223253
putative NAD(P)H-binding oxidoreductase with NAD(P)-binding Rossmann-fold domain	0.0223253
L-ascorbate 6-phosphate lactonase	0.0223253
acyl carrier protein phosphodiesterase	0.0223081
putative transporter YbaT	0.0223081
high-affinity pyruvate receptor	0.0223081
type IV conjugative transfer system protein TraL	0.0223081
patatin-like family phospholipase	0.0223081
modulator protein	0.0222909
2-methylcitrate synthase	0.0222909
phosphatidylserine synthase	0.0222909
mannitol dehydrogenase	0.0222909
DNA utilization protein HofN	0.0222737
ribonucleoside-diphosphate reductase 1 subunit alpha	0.0222737
L-valine exporter subunit YgaZ	0.0222393
nitric oxide dioxygenase	0.0222393
SIS domain-containing protein	0.0222393
L-arginine ABC transporter membrane subunit ArtQ	0.0222393
lysis protein	0.0222222
choline dehydrogenase	0.0222222
peptide chain release factor RF1	0.0222222
glutaredoxin 4	0.0222222
purine ribonucleoside efflux pump NepI	0.022205
P-loop NTPase family protein	0.022205
formate-dependent uric acid utilization protein YgfT	0.022205
protein YaiA	0.022205
glyoxalase I	0.022205
5-dehydro-4-deoxy-D-glucuronate isomerase	0.0221878
pyruvate kinase II	0.0221878
small heat shock protein IbpB	0.0221878
non-heme ferritin-like protein	0.0221878
protein required for KefB activity	0.0221706
putative LysR-type DNA-binding transcriptional regulator YfiE	0.0221706
(S)-ureidoglycine aminohydrolase	0.0221706
transporter YfdV	0.0221706
glutathione-dependent disulfide-bond oxidoreductase	0.0221706
serine protease	0.0221706
beta-D-glucuronidase	0.0221706
sulfate transporter CysZ	0.0221534
symporter SdaC	0.0221534
carbon starvation protein involved in peptide utilization	0.0221534
DNA oxidative demethylase AlkB	0.0221534
aminoimidazole riboside kinase	0.0221362
flagella biosynthesis regulatory protein FliZ	0.0221362
UTP--glucose-1-phosphate uridylyltransferase	0.0221362
excision nuclease subunit C	0.022119
phosphodiesterase	0.022119
tRNA preQ1(34) S-adenosylmethionine ribosyltransferase-isomerase	0.022119
putative Fe(2(+))-trafficking protein	0.022119
putative universal stress (ethanol tolerance) protein B	0.022119
Sec translocon accessory complex subunit SecD	0.022119
KpLE2 phage-like element; putative transporter YjhF	0.0221018
conserved inner membrane protein YeiH	0.0221018
lipopolysaccharide transport system protein LptG	0.0221018
glycogen phosphorylase	0.0221018
uncharacterized protein YggE	0.0221018
DNA-binding transcriptional repressor LexA	0.0221018
YdiL family protein	0.0220847
nitrogen regulator GlnK	0.0220847
23S rRNA (guanosine(2251)-2'-O)-methyltransferase RlmB	0.0220847
mischarged aminoacyl-tRNA deacylase	0.0220847
putative oxidoreductase FixC	0.0220675
AraC family ligand binding domain-containing protein	0.0220675
DUF2810 domain-containing protein YibL	0.0220503
intermembrane phospholipid transport system - periplasmic binding protein	0.0220503
D-alanine--D-alanine ligase A	0.0220503
DNA-binding transcriptional activator AdiY	0.0220503
YjhT family mutarotase	0.0220331
intramembrane zinc metalloprotease	0.0220331
ferredoxin-type protein NapH	0.0220331
PF05981 family protein CreA	0.0220331
methylglyoxal synthase	0.0220159
DUF3053 domain-containing protein YiaF	0.0220159
periplasmic serine endoprotease DegP	0.0220159
DNA-binding transcriptional dual regulator PhoB	0.0220159
SEDS family protein MrdB	0.0220159
undecaprenyl diphosphate synthase	0.0220159
L-cystine transporter	0.0219987
putative N-acetylmannosamine-6-phosphate epimerase	0.0219987
DUF2623 family protein	0.0219987
twin arginine protein translocation system - TatC protein	0.0219987
diguanylate cyclase DgcN	0.0219815
M48 family metallopeptidase	0.0219815
DNA-binding transcriptional dual regulator SoxS	0.0219815
spermidine synthase	0.0219815
outer membrane protein X	0.0219644
3-(3-hydroxy-phenyl)propionate transporter MhpT	0.0219644
DUF480 domain-containing protein	0.0219644
guanine deaminase	0.0219644
inverse autotransporter invasin YchO	0.0219644
cytochrome c assembly protein family inner membrane protein	0.0219472
toxin B	0.0219472
nicotinamide riboside transporter	0.0219472
symporter DtpB	0.0219472
intermembrane phospholipid transport system, substrate binding protein MlaD	0.0219472
oxidoreductase II	0.02193
arabinose ABC transporter substrate-binding protein	0.02193
L-arabinose-inducible transporter	0.02193
soluble pyridine nucleotide transhydrogenase	0.02193
AsnC family transcriptional regulator	0.02193
putative transporter YdhC	0.02193
sensory histidine kinase UhpB	0.0219128
DNA-binding transcriptional repressor CytR	0.0219128
putative transport protein YfdV	0.0219128
molybdopterin dinucleotide binding domain protein	0.0218956
pyruvate kinase I	0.0218956
protein YfgG	0.0218956
2,5-didehydrogluconate reductase DkgB	0.0218956
DNA-binding transcriptional dual regulator MarA	0.0218956
endolytic murein transglycosylase	0.0218784
outer membrane channel TolC	0.0218784
glutamate--pyruvate aminotransferase AlaA	0.0218784
DUF882 domain-containing protein YcbK	0.0218612
symporter Kup	0.0218441
DNA-binding transcriptional dual regulator LldR	0.0218441
putative transporter YdiK	0.0218441
acetolactate synthase 3 large subunit	0.0218441
DNA topoisomerase IV subunit B	0.0218269
putative transporter YaaJ	0.0218269
OPG biosynthetic periplasmic beta-1,6 branching glycosyltransferase	0.0218269
S-ureidoglycine aminohydrolase	0.0218097
DUF1307 domain-containing protein	0.0218097
ferric enterobactin outer membrane transporter	0.0218097
D-altronate dehydratase	0.0217925
conserved inner membrane protein YnfA	0.0217925
Cu(+)/Ag(+) sensor histidine kinase CusS	0.0217925
ssDNA translocase and dsDNA helicase - DNA helicase II	0.0217925
peptidoglycan DD-endopeptidase PbpG	0.0217753
putative c-di-GMP phosphodiesterase PdeK	0.0217753
ancillary SecYEG translocon subunit	0.0217753
FdhF/YdeP family oxidoreductase	0.0217753
betaine-aldehyde dehydrogenase	0.0217753
putative dethiobiotin synthetase	0.0217581
type III secretion protein EivG	0.0217409
peptidoglycan DD-endopeptidase/peptidoglycan LD-carboxypeptidase	0.0217409
HslU--HslV peptidase ATPase subunit	0.0217066
hydroxypyruvate isomerase	0.0217066
dihydrodipicolinate synthase family protein	0.0216894
intermembrane phospholipid transport system, ATP binding subunit MlaF	0.0216894
NADPH-dependent aldehyde reductase YahK	0.0216722
glycerol-3-phosphate responsive antiterminator	0.0216722
YmgD family protein	0.021655
conserved protein YmdF	0.021655
betaine aldehyde dehydrogenase	0.021655
phage CAAX amino terminal protease family protein	0.0216378
maltose ABC transporter ATP binding subunit	0.0216378
putative LysR-type DNA-binding transcriptional regulator YahB	0.0216378
hypothetical protein b2497	0.0216378
putative C-S lyase	0.0216206
RtcB family protein	0.0216034
tRNA pseudouridine(55) synthase	0.0216034
cytochrome bd-II ubiquinol oxidase subunit I	0.0215863
knotted carbamoyltransferase YgeW	0.0215691
fumarate reductase membrane protein FrdC	0.0215691
twin arginine protein translocation system - TatE protein	0.0215519
peptidyl-prolyl cis-trans isomerase A	0.0215347
inner membrane protein YfdC	0.0215347
peptidyl-prolyl cis-trans isomerase FkpA	0.0215347
putative cellulose biosynthesis protein BcsF	0.0215347
phage adsorption protein NrfB	0.0215347
MASE1 domain-containing protein	0.0215347
HNH nuclease family protein	0.0215175
DNA-binding transcriptional repressor UidR	0.0215175
phosphoenolpyruvate-protein phosphotransferase PtsP	0.0215003
type VI secretion protein	0.0215003
signal transduction protein PmrD	0.0215003
serine protease autotransporter EspP	0.0215003
sugar-binding transcriptional regulator	0.0214831
acid resistance transcriptional activator GadX	0.0214831
putative carbamoyltransferase YgeW	0.0214659
putative peptidase YhbU	0.0214659
DNA-binding transcriptional dual regulator NagC	0.0214488
exodeoxyribonuclease V subunit beta	0.0214488
tRNA adenosine(34) deaminase	0.0214488
D-arabinose 5-phosphate isomerase KdsD	0.0214488
DUF440 domain-containing protein YciU	0.0214316
uroporphyrinogen decarboxylase	0.0214144
citrate lyase synthetase	0.0214144
DUF2776 family protein	0.0214144
Alw26I/Eco31I/Esp3I family type II restriction adenine-specific DNA-methyltransferase	0.0214144
AsmA2 domain-containing protein	0.0213972
cystine ABC transporter ATP binding subunit	0.0213972
glucan biosynthesis protein D	0.0213972
putative peptidase YgeY	0.02138
NADH:flavorubredoxin reductase NorW	0.02138
lauroyl acyltransferase	0.02138
deoxyribose-phosphate aldolase	0.0213628
UV-inducible global regulator	0.0213628
WGR domain-containing protein	0.0213456
YebY family protein	0.0213456
DUF218 domain-containing protein SanA	0.0213456
sensory histidine kinase RcsC	0.0213456
DUF1471 domain-containing protein YdgH	0.0213285
class II fumarate hydratase	0.0213285
adenosylmethionine-8-amino-7-oxononanoate aminotransferase	0.0213285
inactive transposase YbfQ	0.0213285
DNA-binding transcriptional dual regulator HprR	0.0213113
antiporter NhaB	0.0213113
putative 4-deoxy-4-formamido-L-arabinose-phosphoundecaprenol deformylase ArnD	0.0212941
TRAP transporter large permease	0.0212941
xylulokinase	0.0212769
diguanylate cyclase DgcC	0.0212769
ATP synthase F1 complex subunit gamma	0.0212769
posphoenolpyruvate synthetase regulatory protein	0.0212597
putative oxidoreductase	0.0212597
3-hydroxy acid dehydrogenase	0.0212425
molybdate ABC transporter membrane subunit	0.0212425
VTT domain-containing protein	0.0212253
heme trafficking system membrane protein CcmD	0.0212081
allantoin transporter	0.0212081
ketol-acid reductoisomerase (NADP(+))	0.0212081
glutathione-specific gamma-glutamylcyclotransferase	0.0212081
putative 3-phenylpropionate transporter	0.0212081
site-specific recombinase	0.021191
putative DNA-binding transcriptional regulator YciT	0.0211738
23S rRNA pseudouridine(955/2504/2580) synthase	0.0211738
DNA-binding transcriptional regulator RclR	0.0211738
BOF family protein YgiW	0.0211738
aminodeoxychorismate synthase component 1	0.0211738
formate dehydrogenase N subunit gamma	0.0211566
protein sulfenic acid reductase DsbG	0.0211566
DNA-binding transcriptional dual regulator H-NS	0.0211566
MurR/RpiR family transcriptional regulator	0.0211566
UPF0208 membrane protein YfbV	0.0211394
alpha-dehydro-beta-deoxy-D-glucarate aldolase	0.0211222
periplasmic folding chaperone	0.0211222
DNA-binding transcriptional activator GadE	0.021105
protein YceI	0.021105
selenocysteyl-tRNA-specific translation elongation factor	0.0210878
DoxX family protein	0.0210707
lysine decarboxylase 1	0.0210707
ribosomal protein S6 modification protein	0.0210535
class I fructose-bisphosphate aldolase	0.0210363
DUF4976 domain-containing protein	0.0210363
GTPase family protein	0.0210363
PIG-L family deacetylase	0.0210191
phosphoenolpyruvate synthetase	0.0210191
YhbP family protein	0.0210019
IPR008135 CinA family protein YfaY	0.0210019
1-deoxy-D-xylulose 5-phosphate reductoisomerase	0.0209847
type IA DNA topoisomerase	0.0209847
phosphatidylserine decarboxylase proenzyme	0.0209847
nucleotide exchange factor GrpE	0.0209847
free methionine-(R)-sulfoxide reductase	0.0209675
tagatose-bisphosphate aldolase subunit GatY	0.0209504
symporter PheP	0.0209332
transcription antiterminator RfaH	0.0208816
LacI family DNA-binding transcriptional regulator	0.0208644
tail anchored inner membrane protein	0.0208644
DUF943 family protein	0.0208644
carbohydrate kinase	0.0208644
3-dehydroquinate synthase	0.0208644
23S rRNA 2'-O-ribose C2498 methyltransferase	0.0208472
threonine synthase	0.0208472
riboflavin synthase	0.02083
FKBP-type peptidyl-prolyl cis-trans isomerase FklB	0.0208129
protein CutC	0.0207957
sensory histidine kinase PhoQ	0.0207957
tryptophanase	0.0207957
Cu(+)/Ag(+) efflux RND transporter outer membrane channel CusC	0.0207957
nitrate/nitrite transporter	0.0207613
class I fumarate hydratase	0.0207613
bifunctional UDP-sugar hydrolase/5'-nucleotidase	0.0207613
chromosome partition protein MukB	0.0207441
fused 23S rRNA m(2)G2445 methyltransferase and 23S rRNA m(7)G2069 methyltransferase	0.0207269
intermembrane transport protein YebS	0.0207097
4-hydroxy-2-oxovalerate aldolase	0.0206926
DedA family protein YghB	0.0206926
recombination-promoting nuclease RpnB	0.0206926
DNA-3-methyladenine glycosylase I	0.0206754
putative NUDIX hydrolase with low 3-phosphohydroxypyruvate phosphatase activity	0.0206754
aromatic carboxylic acid efflux pump subunit AaeB	0.0206582
interchange protein DsbG	0.020641
putative ribosomal protein	0.020641
DNA-binding transcriptional repressor AllR	0.020641
ferrous iron transport protein A	0.0206238
DUF2511 domain-containing protein YebY	0.0206238
cellulose biosynthesis protein BcsE	0.0206066
(4S)-4-hydroxy-5-phosphonooxypentane-2,3-dione isomerase	0.0205722
DUF1454 domain-containing protein YiiQ	0.0205722
vitamin B12 ABC transporter periplasmic binding protein	0.0205722
DNA-binding transcriptional dual regulator NtrC	0.0205551
putative transporter YhjE	0.0205379
T3SS secreted effector EspM	0.0205379
putative transporter YhjD	0.0205379
ATP-dependent RNA helicase RhlE	0.0205207
protein YhaB	0.0205035
copper homeostasis protein CutC	0.0204863
PTS system mannose/fructose/N-acetylgalactosamine-transporter subunit IIB	0.0204863
RatA-like protein	0.0204863
membrane-associated metal-dependent hydrolase	0.0204863
propionate CoA-transferase	0.0204691
Cu(+)/Ag(+) efflux RND transporter periplasmic adaptor subunit CusB	0.0204691
fused glutamine synthetase deadenylase/glutamine synthetase adenylyltransferase	0.0204176
ethanolamine utilization acetate kinase EutP	0.020366
outer membrane lipoprotein Slp	0.020366
putative iron siderophore outer membrane transporter	0.0203488
tRNA m(7)G46 methyltransferase	0.0203488
carbamoyl phosphate synthetase subunit beta	0.0203316
oxygen-insensitive NADPH nitroreductase	0.0203145
cobalamin-dependent methionine synthase	0.0203145
glutathione synthetase	0.0203145
dipeptide ABC transporter periplasmic binding protein	0.0202973
N,N'-diacetylchitobiose-specific PTS enzyme IIC component	0.0202973
symporter permease	0.0202973
GAF domain-containing protein	0.0202801
oligosaccharide flippase family protein	0.0202629
fused heptose 7-phosphate kinase/heptose 1-phosphate adenyltransferase	0.0202629
50S ribosomal subunit protein L1	0.0202629
Zn-dependent oxidoreductase	0.0202629
DNA gyrase subunit B	0.0202457
DUF2544 domain-containing protein	0.0202285
periplasmic protein involved in nickel/cobalt export	0.0202285
TraC family protein	0.0202113
major capsid protein	0.0202113
HTH-type transcriptional regulator MlrA	0.0201941
protein YebF	0.020177
K(+) transporting P-type ATPase subunit KdpA	0.020177
methylmalonyl-CoA mutase	0.0201426
4-aminobutyrate aminotransferase GabT	0.020091
gamma-glutamyltransferase	0.020091
crossover junction endodeoxyribonuclease RuvC	0.020091
protein ViaA	0.020091
KHG/KDPG aldolase	0.0200738
DNA-binding transcriptional dual regulator PrpR	0.0200567
ornithine decarboxylase SpeF	0.0200567
RNase P protein component	0.0200567
thioredoxin reductase	0.0200567
flagellar L-ring protein	0.0200395
putative fimbrial-like adhesin protein	0.0200395
Rha family transcriptional regulator	0.0200395
multifunctional acyl-CoA thioesterase I/protease I/lysophospholipase L1	0.0200223
general secretion pathway protein GspK	0.0200223
trimethylamine-N-oxide reductase TorA	0.0199879
putative PTS enzyme IIA component YadI	0.0199879
DUF2135 domain-containing protein	0.0199879
high-affinity gluconate transporter	0.0199879
lipoprotein NlpE	0.0199707
phage shock protein C	0.0199535
sulfurtransferase complex subunit TusC	0.019902
nitrate reductase A subunit beta	0.019902
Der GTPase-activating protein YihI	0.019902
FAD-binding oxidoreductase	0.019902
lysophospholipid transporter	0.019902
aldehyde dehydrogenase family protein	0.0198848
tellurite methyltransferase	0.0198676
PTS N-acetylgalactosamine transporter subunit IID	0.0198676
DUF1338 domain-containing protein YdcJ	0.0198504
DUF2620 domain-containing protein	0.0198504
DNA repair protein RecN	0.0198504
membrane fusion protein component of efflux pump	0.0198332
cytochrome c biogenesis heme-transporting ATPase CcmA	0.0198332
transcriptional regulator LldR	0.0198332
fructuronate-inducible hexuronate regulon transcriptional repressor	0.019816
lipid IV(A) palmitoyltransferase PagP	0.019816
peptidyl-tRNA hydrolase	0.019816
flagellar basal body rod protein FlgB	0.0197989
DUF1889 family protein	0.0197817
T3SS effector EspY4	0.0197817
phage tail assembly protein T	0.0197645
sialate O-acetylesterase	0.0197645
HMP-PP phosphatase	0.0197645
transaldolase A	0.0197645
NADPH-dependent curcumin/dihydrocurcumin reductase	0.0197645
II N-acetylfucosaminyltransferase	0.0197473
putative FMN binding protein YhbP	0.0197473
putative ABC transporter ATP-binding protein YadG	0.0197473
anthranilate synthase subunit TrpE	0.0197301
twin arginine protein translocation system - TatA protein	0.0197301
50S ribosomal subunit protein L24	0.0197301
flagella biosynthesis regulator Flk	0.0197129
dihydroxyacetone kinase subunit K	0.0197129
putative acyltransferase YihG	0.0197129
DASS family sodium-coupled anion symporter	0.0196957
IclR family transcriptional regulator YiaJ	0.0196614
flotillin family protein	0.0196614
lipopolysaccharide 1,2-glucosyltransferase WaaR	0.0196442
dCMP phosphohydrolase	0.019627
putative 7-carboxy-7-deazaguanine synthase QueE	0.0196098
sugar efflux transporter	0.0196098
DUF1120 domain-containing protein	0.0195582
sigma factor-binding protein Crl	0.0195582
DNA-binding transcriptional dual regulator GadX	0.0195411
threonine dehydrogenase	0.0195239
CNNM family cation transport protein YoaE	0.0195067
N(6)-L-threonylcarbamoyladenine synthase, TsaD subunit	0.0194895
DNA-binding transcriptional repressor GntR	0.0194723
bifunctional indole-3-glycerol-phosphate synthase TrpC/phosphoribosylanthranilate isomerase TrpF	0.0194551
conjugal transfer protein TraH	0.0194379
porin OmpF	0.0194379
TolC family outer membrane protein	0.0194208
AlpA family transcriptional regulator	0.0194208
metalloprotease TldD	0.0194208
co-chaperone protein DjlA	0.0194036
trehalose-6-phosphate phosphatase	0.0194036
16S rRNA m(5)C967 methyltransferase	0.0194036
phage virion morphogenesis protein	0.0194036
S-adenosylmethionine decarboxylase proenzyme	0.0193864
lipopolysaccharide core biosynthesis protein WaaY	0.0193864
aldose-1-epimerase	0.019352
glutamate synthase subunit GltD	0.019352
type II toxin-antitoxin system HicA family toxin	0.0193348
four-carbon acid sugar kinase family protein	0.0193176
serine/threonine protein phosphatase	0.0193004
outer membrane protein W	0.0192833
multidrug efflux transporter periplasmic adaptor subunit MdtN	0.0192833
fused aspartate kinase/homoserine dehydrogenase 1	0.0192833
pyridine nucleotide-disulfide oxidoreductase	0.0192661
DNA-binding transcriptional repressor PgrR	0.0192317
DUF1998 domain-containing protein	0.0192317
putative DNA-binding transcriptional regulator YddM	0.0192145
lauroyl-Kdo(2)-lipid IV(A) myristoyltransferase	0.0192145
putative DNA-binding transcriptional regulator YegW	0.0191973
acetaldehyde dehydrogenase (acylating)	0.0191973
lipopolysaccharide assembly protein B	0.0191973
colanic acid biosynthesis glycosyltransferase WcaL	0.019163
endonuclease V	0.0191458
oxidoreductase, membrane protein SdhD	0.0191114
gamma-glutamyl-gamma-aminobutyrate hydrolase	0.0191114
glycerophosphodiester phosphodiesterase	0.0191114
guanosine-5'-triphosphate,3'-diphosphate phosphatase	0.0190942
type II secretion system protein GspC	0.019077
16S rRNA m(2)G1516 methyltransferase	0.019077
DUF2509 family protein	0.019077
GTP cyclohydrolase 2	0.0190426
UDP-N-acetyl-D-mannosaminuronic acid transferase	0.0189739
type-F conjugative transfer system secretin TraK	0.0189739
putative transporter YgcS	0.0189739
YhiJ/YhiL family protein	0.0189739
glutathione S-transferase GstA	0.0189567
DNA-binding transcriptional repressor UlaR	0.0189567
putative transporter YjeM	0.0189567
DNA-binding transcriptional dual regulator MntR	0.0189567
acyl-CoA thioesterase	0.0189223
RNA polymerase subunit beta'	0.0189052
PrgH/EprH family type III secretion apparatus protein	0.018888
type III effector protein	0.018888
lyase	0.018888
putative inorganic phosphate export protein	0.018888
beta-hydroxyacyl-acyl carrier protein dehydratase/isomerase	0.0188364
protein disulfide oxidoreductase - DsbDreduced	0.0188364
DNA-binding transcriptional repressor Zur	0.0188192
DUF2773 domain-containing protein YdbD	0.0188192
curli assembly component	0.018802
IS30 family transposase	0.0187849
SgrR family transcriptional regulator	0.0187849
inactive 6-phospho-alpha-glucosidase	0.0187505
glycolate dehydrogenase, putative FAD-linked subunit	0.0187505
3-hydroxyacyl-CoA dehydrogenase FadJ	0.0187505
single-stranded DNA-binding protein	0.0187161
transcriptional regulator GutM	0.0187161
fimbria assembly protein	0.0186817
gamma-glutamylputrescine oxidase	0.0186645
DUF1440 domain-containing protein	0.0186645
DNA-binding transcriptional dual regulator RutR	0.0186474
pre-peptidase C-terminal domain-containing protein	0.0186474
DNA-binding transcriptional regulator AscG	0.0186474
DNA-binding transcriptional repressor Mlc	0.0186474
putative PTS enzyme II component GlvB	0.0186302
hydrogenase expression/formation protein	0.0186302
myristoyl-acyl carrier protein-dependent acyltransferase	0.0186302
RadC family protein	0.0186302
colanic acid biosynthesis acetyltransferase WcaF	0.0186302
3-hydroxy-5-phosphonooxypentane-2,4-dione thiolase	0.018613
DNA-binding transcriptional dual regulator AraC	0.018613
phosphonate metabolism protein PhnP	0.018613
regulatory ATPase RavA	0.0185958
nucleoside diphosphate kinase	0.0185958
regulator for fimA	0.0185958
CP4-57 prophage; uncharacterized protein YfjW	0.0185958
host-nuclease inhibitor protein Gam	0.0185958
Sel1 repeat-containing protein YjcO	0.0185614
dipeptide permease DtpD	0.0185442
DNA polymerase V protein UmuD	0.0185271
conserved protein YigA	0.0185099
2,3-dihydroxy-2,3-dihydrophenylpropionate dehydrogenase	0.0185099
ribosomal-protein-S18-alanine N-acetyltransferase	0.0184927
tripartite tricarboxylate transporter substrate binding protein	0.0184927
putative 4Fe-4S cluster-containing protein YfhL	0.0184755
DUF3829 domain-containing lipoprotein YiiG	0.0184755
glutamate/gamma-aminobutyrate family transporter YjeM	0.0184583
alpha-mannosidase mngB	0.0184583
putative sulfurtransferase YedF	0.0184583
type IV conjugative transfer system lipoprotein TraV	0.0184411
lysine decarboxylase LdcC	0.0184411
dTDP-glucose 4,6-dehydratase	0.0184411
putative c-di-GMP binding protein CdgI	0.0184239
copper binding protein CutA	0.0183896
DUF986 family protein	0.0183724
NADPH-dependent aldehyde reductase YqhD	0.0183724
NADH-Ubiquinone/plastoquinone (complex I), various chains family protein	0.0183724
DUF1145 family protein	0.0183552
two-component system sensor histidine kinase GlrK	0.0183552
DNA-binding transcriptional dual regulator SdiA	0.018338
ethanolamine utilization protein EutJ	0.0183036
transcriptional regulator PchA	0.0183036
glycosyl hydrolases 31 family protein	0.0183036
multidrug efflux system	0.0182864
DNA-binding transcriptional repressor NsrR	0.0182864
hydrogenase 4 subunit H	0.0182864
hypothetical protein ECs_3123	0.0182693
putative transcriptional regulator SfsB	0.0182521
sulfite reductase, flavoprotein subunit	0.0182521
putative transporter YfcC	0.0182177
DUF1471 domain-containing protein YahO	0.0182177
DUF3811 domain-containing protein	0.0182177
DNA-binding transcriptional dual regulator NanR	0.0182005
uncharacterized protein YqeC	0.0181833
fumarylacetoacetate hydrolase family protein	0.0181833
RepB family plasmid replication initiator protein	0.0181318
putative pyruvate formate-lyase 2 activating enzyme PflC	0.0181318
type III secretion system LEE translocated intimin receptor Tir	0.0181318
glycerol-3-phosphate dehydrogenase subunit GlpB	0.0181318
nitrite reductase subunit NirD	0.0181146
putative lipopolysaccharide biosynthesis protein	0.0181146
putative phosphatase	0.0180974
CoA-transferase	0.0180974
invasin	0.0180458
YegP family protein	0.0180115
type I secretion system permease/ATPase	0.0179943
hypothetical protein ECs_0561	0.0179943
glyoxylate/hydroxypyruvate reductase GhrB	0.0179771
cytochrome C	0.0179599
antitoxin/DNA-binding transcriptional repressor HigA	0.0179427
DNA-binding transcriptional dual regulator Nac	0.0179427
prepilin peptidase PppA	0.0179255
type III secretion apparatus protein OrgA/MxiK	0.017874
multidrug efflux pump EmrD	0.017874
L-alanine exporter	0.017874
regulator with hipB	0.017788
putative ABC transporter membrane subunit YcjO	0.0177537
O-antigen flippase	0.0177365
type-F conjugative transfer system protein TrbI	0.0177365
cyclic di-GMP phosphodiesterase PdeR	0.0177365
galactose oxidase	0.0177193
Type II secretion system protein GspF	0.0177193
galactosamine-6-phosphate isomerase	0.0177193
IPR002035 domain-containing protein YegL	0.0177193
F-type conjugal transfer protein TrbF	0.0177193
phosphatase PAP2/dual specificity phosphatase family protein	0.0177021
DNA-binding transcriptional repressor SrlR	0.0177021
hypothetical protein ECs_1960	0.0176849
KpLE2 phage-like element; putative oxidoreductase YjhC	0.0176849
protein YibT	0.0176677
DUF2686 family protein	0.0176677
nitrate reductase Z subunit gamma	0.0176677
protein Smp	0.0176677
AAA domain-containing protein	0.0176505
RNA helicase	0.0176334
addiction module toxin RelE	0.0176162
4-amino-4-deoxychorismate lyase component of para-aminobenzoate synthase multienzyme complex	0.0176162
nickel ABC transporter, nickel/metallophore periplasmic binding protein	0.0176162
HsdR family type I site-specific deoxyribonuclease	0.0176162
regulator of the transcriptional regulator FhlA	0.0176162
YdbH family protein	0.0176162
catecholate siderophore receptor Fiu	0.0176162
RHS domain-containing protein	0.017599
DNA-binding transcriptional dual regulator HypT	0.017599
L,D-transpeptidase YcfS	0.017599
type 1 fimbria chaperone FimC	0.0175646
TonB-dependent receptor plug domain-containing protein	0.0175646
dTDP-4-dehydrorhamnose 3,5-epimerase	0.0175646
serine/threonine-specific protein phosphatase	0.0175302
phosphoserine/phosphohydroxythreonine aminotransferase	0.0175302
YjcZ-like family protein	0.0175131
glutathione ABC transporter substrate-binding protein GsiB	0.0175131
relaxase/mobilization nuclease domain-containing protein	0.0175131
glutamate/aspartate ABC transporter membrane subunit GltK	0.0174959
4-hydroxy-tetrahydrodipicolinate reductase	0.0174959
putative kinase YniA	0.0174787
family 1 glycosylhydrolase	0.0174787
glycyl radical protein	0.0174787
protein/nucleic acid deglycase 2	0.0174615
exodeoxyribonuclease V subunit RecB	0.0174615
tagatose-bisphosphate aldolase subunit GatZ	0.0174615
tail fiber protein	0.0174615
IS110 family transposase	0.0174099
putative transcriptional regulator FrvR	0.0173927
disulfide reductase	0.0173756
DNA methylase	0.0173756
DNA utilization protein HofO	0.0173756
LPS export ABC transporter permease LptG	0.0173584
methionine sulfoxide reductase B	0.0173412
aerotaxis sensor receptor, flavoprotein	0.0173412
D-xylose transporter XylE	0.0173412
inner membrane protein - inhibits the Rcs signaling pathway	0.0173412
2-hydroxyacyl-CoA dehydratase subunit D	0.017324
regulator	0.0172896
Cu(+) exporting P-type ATPase	0.0172896
phosphoglucomutase	0.0172381
beta-D-glucoside glucohydrolase	0.0172209
fructose-1-phosphate/6-phosphogluconate phosphatase	0.0172037
DUF406 domain-containing protein	0.0171865
HilA family transcriptional regulator EilA	0.0171693
putative xanthine dehydrogenase molybdenum-binding subunit XdhA	0.0171693
methylmalonyl Co-A mutase-associated GTPase MeaB	0.0171693
5-carboxymethyl-2-hydroxymuconate semialdehyde dehydrogenase	0.0171349
cytochrome c552 nitrite reductase	0.0171006
IS91 family transposase	0.0171006
DUF927 domain-containing protein	0.0171006
3-methyl-2-oxobutanoate hydroxymethyltransferase	0.0171006
methylglyoxal reductase DkgA	0.0170318
holocytochrome c synthetase membrane subunit CcmF	0.0170318
DUF2766 domain-containing protein YecJ	0.0170318
sensory histidine kinase NarX	0.0170146
phosphopentomutase	0.0170146
3-ketoacyl-CoA thiolase FadI	0.0169975
3-deoxy-D-manno-oct-2-ulosonate III transferase WaaZ	0.0169975
T3SS effector-like protein EspY	0.0169975
carnitine monooxygenase subunit YeaW	0.0169803
BREX-1 system adenine-specific DNA-methyltransferase PglX	0.0169803
aminodeoxychorismate synthase subunit 2	0.0169631
DUF1281 domain-containing protein	0.0169631
terminase ATPase subunit family protein	0.0169631
sulfate/thiosulfate ABC transporter periplasmic binding protein Sbp	0.0169631
6-N-hydroxylaminopurine resistance protein	0.0169287
two-component system connector SafA	0.0169115
membrane integrity lipid transport subunit YebS	0.0168943
tRNA cmo(5)U34 methyltransferase	0.0168943
YdiY family protein	0.0168771
iron/manganese ABC transporter substrate-binding protein SitA	0.0168771
UDP-3-O-acyl-N-acetylglucosamine deacetylase	0.01686
6-phospho-beta-glucosidase BglA	0.0168428
antitoxin of the HicA-HicB toxin-antitoxin system	0.0168428
oxygen-dependent coproporphyrinogen oxidase	0.0168428
phosphoadenosine phosphosulfate reductase	0.0168428
ornithine decarboxylase, biosynthetic	0.0168428
putative transcriptional regulator YtfH	0.0168256
S49 family peptidase	0.0168084
cobinamide/cobalamin adenosyltransferase	0.0167912
TonB-dependent siderophore receptor	0.0167568
nucleotide binding filament protein	0.0167397
uncharacterized protein YjcZ	0.0167225
DUF1870 domain-containing protein YdiL	0.0166537
lipopolysaccharide 1,6-galactosyltransferase	0.0166537
threonine export protein RhtC	0.0166365
tRNA-binding protein	0.0166365
KDO transferase	0.0166365
phosphoporin PhoE	0.0166365
intermembrane transport protein YebT	0.0166365
thiamine transport system permease	0.0166365
reductase	0.0166194
alkene reductase	0.016585
23S rRNA m(1)G745 methyltransferase	0.0165678
two-component regulatory system response regulator BasR	0.0165506
primosomal protein N'	0.0165506
cytosine permease	0.0165506
acidic protein that suppresses heat sensitivity of a secY mutant	0.0165334
autoinducer 2 ABC transporter substrate-binding protein	0.0165334
DUF1133 family protein	0.0165162
type-F conjugative transfer system pilin assembly protein TraF	0.0165162
conserved protein YeaO	0.0165162
hydroperoxidase I	0.0165162
thiosulfate reductase electron transport protein PhsB	0.016499
putative NAD(P)H-dependent oxidoreductase YcaK	0.0164819
transcriptional regulator NanR	0.0164819
molybdopterin synthase sulfur carrier subunit	0.0164819
phage antitermination protein Q	0.0164647
BenE family transporter YdcO	0.0164647
hypothetical protein ECs_2925	0.0164475
FAD:protein FMN transferase ApbE	0.0164475
protein SseB	0.0164475
Hcp family type VI secretion system effector	0.0164475
L,D-transpeptidase linking Lpp to murein	0.0164303
lipopolysaccharide N-acetylglucosaminyltransferase	0.0164303
fumarase C	0.0164303
zinc ABC transporter substrate-binding protein ZnuA	0.0164131
autotransporter adhesin EhaA	0.0163787
UDP-galactopyranose mutase	0.0163787
DNA/RNA nuclease SfsA	0.0163787
GDP-mannose pyrophosphatase NudK	0.0163787
type 1 fimbriae minor subunit FimF	0.0163787
triphosphoribosyl-dephospho-CoA synthase	0.0163616
dimethyl sulfoxide reductase anchor subunit DmsC	0.0163444
[truncated: 7,274 more rows]
