# Supplementary material for: Comparative Genome Analysis Reveals Accumulation of Single-Nucleotide Repeats in Pathogenic Escherichia Lineages
Source: Curr Issues Mol Biol. 2022 Jan 20;44(2):498–504. doi: 10.3390/cimb44020034 (PMC8928963; doi:10.3390/cimb44020034)
Supplement: Supplementary file 1 [file cimb-44-00034-s001.zip › Table S4.xlsx]

## Sheet: Summary
Table S4. Observed HPTs in the O-157 Sakai strain.
Region	num_seqs	sum_len	min_len	avg_len	max_len	HPTs	% of all HPTs
Ecoli_O157_H7_Sakai Whole genome	1	5498578	5498578	5498578	5498578	7041	100
Ecoli_O157_H7_Sakai Phase Derived Regions	18	755154	6896	41953	100425	1392	19.7699

## Sheet: O157_H7_Sakai_Wholegenome_HPT
seqID	start	end	HPT
NC_002695.2 Escherichia coli O157:H7 str. Sakai DNA, complete genome	47	53	AAAAAAA
NC_002695.2 Escherichia coli O157:H7 str. Sakai DNA, complete genome	292	297	AAAAAA
NC_002695.2 Escherichia coli O157:H7 str. Sakai DNA, complete genome	320	327	TTTTTTTT
NC_002695.2 Escherichia coli O157:H7 str. Sakai DNA, complete genome	508	513	AAAAAA
NC_002695.2 Escherichia coli O157:H7 str. Sakai DNA, complete genome	3838	3843	TTTTTT
NC_002695.2 Escherichia coli O157:H7 str. Sakai DNA, complete genome	5088	5093	TTTTTT
NC_002695.2 Escherichia coli O157:H7 str. Sakai DNA, complete genome	6513	6519	AAAAAAA
NC_002695.2 Escherichia coli O157:H7 str. Sakai DNA, complete genome	7963	7968	AAAAAA
NC_002695.2 Escherichia coli O157:H7 str. Sakai DNA, complete genome	9183	9188	AAAAAA
NC_002695.2 Escherichia coli O157:H7 str. Sakai DNA, complete genome	9909	9915	AAAAAAA
NC_002695.2 Escherichia coli O157:H7 str. Sakai DNA, complete genome	9917	9922	CCCCCC
NC_002695.2 Escherichia coli O157:H7 str. Sakai DNA, complete genome	9927	9932	GGGGGG
NC_002695.2 Escherichia coli O157:H7 str. Sakai DNA, complete genome	10332	10337	TTTTTT
NC_002695.2 Escherichia coli O157:H7 str. Sakai DNA, complete genome	11373	11378	TTTTTT
NC_002695.2 Escherichia coli O157:H7 str. Sakai DNA, complete genome	11904	11909	TTTTTT
NC_002695.2 Escherichia coli O157:H7 str. Sakai DNA, complete genome	12009	12014	AAAAAA
NC_002695.2 Escherichia coli O157:H7 str. Sakai DNA, complete genome	12086	12092	AAAAAAA
NC_002695.2 Escherichia coli O157:H7 str. Sakai DNA, complete genome	12540	12546	AAAAAAA
NC_002695.2 Escherichia coli O157:H7 str. Sakai DNA, complete genome	12817	12822	AAAAAA
NC_002695.2 Escherichia coli O157:H7 str. Sakai DNA, complete genome	14088	14093	AAAAAA
NC_002695.2 Escherichia coli O157:H7 str. Sakai DNA, complete genome	14178	14183	AAAAAA
NC_002695.2 Escherichia coli O157:H7 str. Sakai DNA, complete genome	15292	15297	TTTTTT
NC_002695.2 Escherichia coli O157:H7 str. Sakai DNA, complete genome	15803	15808	TTTTTT
NC_002695.2 Escherichia coli O157:H7 str. Sakai DNA, complete genome	16058	16063	AAAAAA
NC_002695.2 Escherichia coli O157:H7 str. Sakai DNA, complete genome	18549	18554	TTTTTT
NC_002695.2 Escherichia coli O157:H7 str. Sakai DNA, complete genome	18988	18995	TTTTTTTT
NC_002695.2 Escherichia coli O157:H7 str. Sakai DNA, complete genome	19069	19074	AAAAAA
NC_002695.2 Escherichia coli O157:H7 str. Sakai DNA, complete genome	19142	19147	TTTTTT
NC_002695.2 Escherichia coli O157:H7 str. Sakai DNA, complete genome	20090	20095	CCCCCC
NC_002695.2 Escherichia coli O157:H7 str. Sakai DNA, complete genome	20326	20331	TTTTTT
NC_002695.2 Escherichia coli O157:H7 str. Sakai DNA, complete genome	21709	21715	AAAAAAA
NC_002695.2 Escherichia coli O157:H7 str. Sakai DNA, complete genome	21841	21846	TTTTTT
NC_002695.2 Escherichia coli O157:H7 str. Sakai DNA, complete genome	22004	22010	TTTTTTT
NC_002695.2 Escherichia coli O157:H7 str. Sakai DNA, complete genome	22250	22255	TTTTTT
NC_002695.2 Escherichia coli O157:H7 str. Sakai DNA, complete genome	22348	22354	TTTTTTT
NC_002695.2 Escherichia coli O157:H7 str. Sakai DNA, complete genome	22410	22415	AAAAAA
NC_002695.2 Escherichia coli O157:H7 str. Sakai DNA, complete genome	22487	22492	AAAAAA
NC_002695.2 Escherichia coli O157:H7 str. Sakai DNA, complete genome	23119	23124	TTTTTT
NC_002695.2 Escherichia coli O157:H7 str. Sakai DNA, complete genome	23254	23259	TTTTTT
NC_002695.2 Escherichia coli O157:H7 str. Sakai DNA, complete genome	23316	23321	TTTTTT
NC_002695.2 Escherichia coli O157:H7 str. Sakai DNA, complete genome	23347	23353	TTTTTTT
NC_002695.2 Escherichia coli O157:H7 str. Sakai DNA, complete genome	23637	23642	TTTTTT
NC_002695.2 Escherichia coli O157:H7 str. Sakai DNA, complete genome	23680	23686	TTTTTTT
NC_002695.2 Escherichia coli O157:H7 str. Sakai DNA, complete genome	24183	24188	TTTTTT
NC_002695.2 Escherichia coli O157:H7 str. Sakai DNA, complete genome	24220	24226	TTTTTTT
NC_002695.2 Escherichia coli O157:H7 str. Sakai DNA, complete genome	24479	24485	AAAAAAA
NC_002695.2 Escherichia coli O157:H7 str. Sakai DNA, complete genome	24554	24560	AAAAAAA
NC_002695.2 Escherichia coli O157:H7 str. Sakai DNA, complete genome	25170	25176	AAAAAAA
NC_002695.2 Escherichia coli O157:H7 str. Sakai DNA, complete genome	26650	26656	AAAAAAA
NC_002695.2 Escherichia coli O157:H7 str. Sakai DNA, complete genome	26734	26739	TTTTTT
NC_002695.2 Escherichia coli O157:H7 str. Sakai DNA, complete genome	26935	26940	AAAAAA
NC_002695.2 Escherichia coli O157:H7 str. Sakai DNA, complete genome	26944	26950	AAAAAAA
NC_002695.2 Escherichia coli O157:H7 str. Sakai DNA, complete genome	30083	30088	TTTTTT
NC_002695.2 Escherichia coli O157:H7 str. Sakai DNA, complete genome	30102	30107	AAAAAA
NC_002695.2 Escherichia coli O157:H7 str. Sakai DNA, complete genome	31651	31656	TTTTTT
NC_002695.2 Escherichia coli O157:H7 str. Sakai DNA, complete genome	32788	32793	GGGGGG
NC_002695.2 Escherichia coli O157:H7 str. Sakai DNA, complete genome	33872	33877	AAAAAA
NC_002695.2 Escherichia coli O157:H7 str. Sakai DNA, complete genome	34578	34583	AAAAAA
NC_002695.2 Escherichia coli O157:H7 str. Sakai DNA, complete genome	36870	36875	AAAAAA
NC_002695.2 Escherichia coli O157:H7 str. Sakai DNA, complete genome	38487	38494	TTTTTTTT
NC_002695.2 Escherichia coli O157:H7 str. Sakai DNA, complete genome	40615	40620	AAAAAA
NC_002695.2 Escherichia coli O157:H7 str. Sakai DNA, complete genome	40989	40995	AAAAAAA
NC_002695.2 Escherichia coli O157:H7 str. Sakai DNA, complete genome	46577	46583	AAAAAAA
NC_002695.2 Escherichia coli O157:H7 str. Sakai DNA, complete genome	49335	49340	AAAAAA
NC_002695.2 Escherichia coli O157:H7 str. Sakai DNA, complete genome	50204	50209	AAAAAA
NC_002695.2 Escherichia coli O157:H7 str. Sakai DNA, complete genome	54216	54223	TTTTTTTT
NC_002695.2 Escherichia coli O157:H7 str. Sakai DNA, complete genome	54926	54931	AAAAAA
NC_002695.2 Escherichia coli O157:H7 str. Sakai DNA, complete genome	57949	57954	TTTTTT
NC_002695.2 Escherichia coli O157:H7 str. Sakai DNA, complete genome	59612	59617	GGGGGG
NC_002695.2 Escherichia coli O157:H7 str. Sakai DNA, complete genome	62077	62082	TTTTTT
NC_002695.2 Escherichia coli O157:H7 str. Sakai DNA, complete genome	62499	62504	TTTTTT
NC_002695.2 Escherichia coli O157:H7 str. Sakai DNA, complete genome	63360	63365	AAAAAA
NC_002695.2 Escherichia coli O157:H7 str. Sakai DNA, complete genome	63755	63760	AAAAAA
NC_002695.2 Escherichia coli O157:H7 str. Sakai DNA, complete genome	63836	63842	TTTTTTT
NC_002695.2 Escherichia coli O157:H7 str. Sakai DNA, complete genome	64125	64131	AAAAAAA
NC_002695.2 Escherichia coli O157:H7 str. Sakai DNA, complete genome	64546	64551	AAAAAA
NC_002695.2 Escherichia coli O157:H7 str. Sakai DNA, complete genome	65781	65786	TTTTTT
NC_002695.2 Escherichia coli O157:H7 str. Sakai DNA, complete genome	68352	68358	TTTTTTT
NC_002695.2 Escherichia coli O157:H7 str. Sakai DNA, complete genome	69915	69920	AAAAAA
NC_002695.2 Escherichia coli O157:H7 str. Sakai DNA, complete genome	70727	70732	AAAAAA
NC_002695.2 Escherichia coli O157:H7 str. Sakai DNA, complete genome	73356	73361	TTTTTT
NC_002695.2 Escherichia coli O157:H7 str. Sakai DNA, complete genome	74911	74917	AAAAAAA
NC_002695.2 Escherichia coli O157:H7 str. Sakai DNA, complete genome	75332	75338	TTTTTTT
NC_002695.2 Escherichia coli O157:H7 str. Sakai DNA, complete genome	76029	76034	AAAAAA
NC_002695.2 Escherichia coli O157:H7 str. Sakai DNA, complete genome	77207	77212	TTTTTT
NC_002695.2 Escherichia coli O157:H7 str. Sakai DNA, complete genome	77760	77765	TTTTTT
NC_002695.2 Escherichia coli O157:H7 str. Sakai DNA, complete genome	78249	78254	TTTTTT
NC_002695.2 Escherichia coli O157:H7 str. Sakai DNA, complete genome	78791	78796	AAAAAA
NC_002695.2 Escherichia coli O157:H7 str. Sakai DNA, complete genome	78895	78900	AAAAAA
NC_002695.2 Escherichia coli O157:H7 str. Sakai DNA, complete genome	80175	80180	TTTTTT
NC_002695.2 Escherichia coli O157:H7 str. Sakai DNA, complete genome	80289	80295	TTTTTTT
NC_002695.2 Escherichia coli O157:H7 str. Sakai DNA, complete genome	80311	80316	AAAAAA
NC_002695.2 Escherichia coli O157:H7 str. Sakai DNA, complete genome	80483	80488	AAAAAA
NC_002695.2 Escherichia coli O157:H7 str. Sakai DNA, complete genome	80645	80650	TTTTTT
NC_002695.2 Escherichia coli O157:H7 str. Sakai DNA, complete genome	81064	81070	TTTTTTT
NC_002695.2 Escherichia coli O157:H7 str. Sakai DNA, complete genome	81128	81133	GGGGGG
NC_002695.2 Escherichia coli O157:H7 str. Sakai DNA, complete genome	81436	81441	AAAAAA
NC_002695.2 Escherichia coli O157:H7 str. Sakai DNA, complete genome	83416	83421	TTTTTT
NC_002695.2 Escherichia coli O157:H7 str. Sakai DNA, complete genome	87037	87042	TTTTTT
NC_002695.2 Escherichia coli O157:H7 str. Sakai DNA, complete genome	88181	88187	AAAAAAA
NC_002695.2 Escherichia coli O157:H7 str. Sakai DNA, complete genome	88206	88211	TTTTTT
NC_002695.2 Escherichia coli O157:H7 str. Sakai DNA, complete genome	88615	88620	TTTTTT
NC_002695.2 Escherichia coli O157:H7 str. Sakai DNA, complete genome	89964	89969	TTTTTT
NC_002695.2 Escherichia coli O157:H7 str. Sakai DNA, complete genome	90024	90030	AAAAAAA
NC_002695.2 Escherichia coli O157:H7 str. Sakai DNA, complete genome	90208	90213	TTTTTT
NC_002695.2 Escherichia coli O157:H7 str. Sakai DNA, complete genome	90853	90859	AAAAAAA
NC_002695.2 Escherichia coli O157:H7 str. Sakai DNA, complete genome	91393	91398	GGGGGG
NC_002695.2 Escherichia coli O157:H7 str. Sakai DNA, complete genome	92027	92032	TTTTTT
NC_002695.2 Escherichia coli O157:H7 str. Sakai DNA, complete genome	92501	92507	TTTTTTT
NC_002695.2 Escherichia coli O157:H7 str. Sakai DNA, complete genome	94041	94047	TTTTTTT
NC_002695.2 Escherichia coli O157:H7 str. Sakai DNA, complete genome	94129	94134	TTTTTT
NC_002695.2 Escherichia coli O157:H7 str. Sakai DNA, complete genome	95519	95524	AAAAAA
NC_002695.2 Escherichia coli O157:H7 str. Sakai DNA, complete genome	96472	96477	AAAAAA
NC_002695.2 Escherichia coli O157:H7 str. Sakai DNA, complete genome	97368	97373	CCCCCC
NC_002695.2 Escherichia coli O157:H7 str. Sakai DNA, complete genome	101486	101491	GGGGGG
NC_002695.2 Escherichia coli O157:H7 str. Sakai DNA, complete genome	111541	111546	AAAAAA
NC_002695.2 Escherichia coli O157:H7 str. Sakai DNA, complete genome	112151	112159	TTTTTTTTT
NC_002695.2 Escherichia coli O157:H7 str. Sakai DNA, complete genome	112178	112183	AAAAAA
NC_002695.2 Escherichia coli O157:H7 str. Sakai DNA, complete genome	114182	114187	AAAAAA
NC_002695.2 Escherichia coli O157:H7 str. Sakai DNA, complete genome	114488	114493	AAAAAA
NC_002695.2 Escherichia coli O157:H7 str. Sakai DNA, complete genome	115555	115560	AAAAAA
NC_002695.2 Escherichia coli O157:H7 str. Sakai DNA, complete genome	115630	115635	TTTTTT
NC_002695.2 Escherichia coli O157:H7 str. Sakai DNA, complete genome	117047	117052	TTTTTT
NC_002695.2 Escherichia coli O157:H7 str. Sakai DNA, complete genome	117341	117346	TTTTTT
NC_002695.2 Escherichia coli O157:H7 str. Sakai DNA, complete genome	117828	117834	AAAAAAA
NC_002695.2 Escherichia coli O157:H7 str. Sakai DNA, complete genome	118265	118270	AAAAAA
NC_002695.2 Escherichia coli O157:H7 str. Sakai DNA, complete genome	119259	119264	TTTTTT
NC_002695.2 Escherichia coli O157:H7 str. Sakai DNA, complete genome	119373	119378	AAAAAA
NC_002695.2 Escherichia coli O157:H7 str. Sakai DNA, complete genome	122103	122108	AAAAAA
NC_002695.2 Escherichia coli O157:H7 str. Sakai DNA, complete genome	122134	122139	TTTTTT
NC_002695.2 Escherichia coli O157:H7 str. Sakai DNA, complete genome	123932	123937	TTTTTT
NC_002695.2 Escherichia coli O157:H7 str. Sakai DNA, complete genome	124229	124234	GGGGGG
NC_002695.2 Escherichia coli O157:H7 str. Sakai DNA, complete genome	126062	126068	TTTTTTT
NC_002695.2 Escherichia coli O157:H7 str. Sakai DNA, complete genome	126374	126379	AAAAAA
NC_002695.2 Escherichia coli O157:H7 str. Sakai DNA, complete genome	127801	127806	AAAAAA
NC_002695.2 Escherichia coli O157:H7 str. Sakai DNA, complete genome	132104	132109	TTTTTT
NC_002695.2 Escherichia coli O157:H7 str. Sakai DNA, complete genome	132240	132247	AAAAAAAA
NC_002695.2 Escherichia coli O157:H7 str. Sakai DNA, complete genome	133047	133052	AAAAAA
NC_002695.2 Escherichia coli O157:H7 str. Sakai DNA, complete genome	133739	133744	AAAAAA
NC_002695.2 Escherichia coli O157:H7 str. Sakai DNA, complete genome	133762	133768	TTTTTTT
NC_002695.2 Escherichia coli O157:H7 str. Sakai DNA, complete genome	135829	135834	TTTTTT
NC_002695.2 Escherichia coli O157:H7 str. Sakai DNA, complete genome	135842	135847	TTTTTT
NC_002695.2 Escherichia coli O157:H7 str. Sakai DNA, complete genome	138647	138653	TTTTTTT
NC_002695.2 Escherichia coli O157:H7 str. Sakai DNA, complete genome	139947	139952	TTTTTT
NC_002695.2 Escherichia coli O157:H7 str. Sakai DNA, complete genome	140823	140830	TTTTTTTT
NC_002695.2 Escherichia coli O157:H7 str. Sakai DNA, complete genome	140867	140873	AAAAAAA
NC_002695.2 Escherichia coli O157:H7 str. Sakai DNA, complete genome	146966	146971	AAAAAA
NC_002695.2 Escherichia coli O157:H7 str. Sakai DNA, complete genome	147182	147189	AAAAAAAA
NC_002695.2 Escherichia coli O157:H7 str. Sakai DNA, complete genome	148321	148326	TTTTTT
NC_002695.2 Escherichia coli O157:H7 str. Sakai DNA, complete genome	148462	148467	TTTTTT
NC_002695.2 Escherichia coli O157:H7 str. Sakai DNA, complete genome	149013	149018	AAAAAA
NC_002695.2 Escherichia coli O157:H7 str. Sakai DNA, complete genome	149344	149350	AAAAAAA
NC_002695.2 Escherichia coli O157:H7 str. Sakai DNA, complete genome	149447	149452	TTTTTT
NC_002695.2 Escherichia coli O157:H7 str. Sakai DNA, complete genome	150362	150367	TTTTTT
NC_002695.2 Escherichia coli O157:H7 str. Sakai DNA, complete genome	154143	154150	TTTTTTTT
NC_002695.2 Escherichia coli O157:H7 str. Sakai DNA, complete genome	155378	155383	AAAAAA
NC_002695.2 Escherichia coli O157:H7 str. Sakai DNA, complete genome	155646	155651	AAAAAA
NC_002695.2 Escherichia coli O157:H7 str. Sakai DNA, complete genome	159800	159806	TTTTTTT
NC_002695.2 Escherichia coli O157:H7 str. Sakai DNA, complete genome	159818	159823	TTTTTT
NC_002695.2 Escherichia coli O157:H7 str. Sakai DNA, complete genome	159880	159885	TTTTTT
NC_002695.2 Escherichia coli O157:H7 str. Sakai DNA, complete genome	160487	160492	TTTTTT
NC_002695.2 Escherichia coli O157:H7 str. Sakai DNA, complete genome	160588	160594	TTTTTTT
NC_002695.2 Escherichia coli O157:H7 str. Sakai DNA, complete genome	161284	161289	TTTTTT
NC_002695.2 Escherichia coli O157:H7 str. Sakai DNA, complete genome	161432	161437	TTTTTT
NC_002695.2 Escherichia coli O157:H7 str. Sakai DNA, complete genome	161442	161447	AAAAAA
NC_002695.2 Escherichia coli O157:H7 str. Sakai DNA, complete genome	161490	161497	AAAAAAAA
NC_002695.2 Escherichia coli O157:H7 str. Sakai DNA, complete genome	163485	163491	AAAAAAA
NC_002695.2 Escherichia coli O157:H7 str. Sakai DNA, complete genome	164416	164421	AAAAAA
NC_002695.2 Escherichia coli O157:H7 str. Sakai DNA, complete genome	164613	164618	TTTTTT
NC_002695.2 Escherichia coli O157:H7 str. Sakai DNA, complete genome	165126	165131	TTTTTT
NC_002695.2 Escherichia coli O157:H7 str. Sakai DNA, complete genome	165182	165187	CCCCCC
NC_002695.2 Escherichia coli O157:H7 str. Sakai DNA, complete genome	165751	165756	AAAAAA
NC_002695.2 Escherichia coli O157:H7 str. Sakai DNA, complete genome	167653	167658	AAAAAA
NC_002695.2 Escherichia coli O157:H7 str. Sakai DNA, complete genome	169318	169323	AAAAAA
NC_002695.2 Escherichia coli O157:H7 str. Sakai DNA, complete genome	179619	179624	GGGGGG
NC_002695.2 Escherichia coli O157:H7 str. Sakai DNA, complete genome	182195	182200	TTTTTT
NC_002695.2 Escherichia coli O157:H7 str. Sakai DNA, complete genome	183457	183464	AAAAAAAA
NC_002695.2 Escherichia coli O157:H7 str. Sakai DNA, complete genome	184430	184435	TTTTTT
NC_002695.2 Escherichia coli O157:H7 str. Sakai DNA, complete genome	185087	185093	AAAAAAA
NC_002695.2 Escherichia coli O157:H7 str. Sakai DNA, complete genome	188417	188422	AAAAAA
NC_002695.2 Escherichia coli O157:H7 str. Sakai DNA, complete genome	188523	188528	AAAAAA
NC_002695.2 Escherichia coli O157:H7 str. Sakai DNA, complete genome	188529	188534	GGGGGG
NC_002695.2 Escherichia coli O157:H7 str. Sakai DNA, complete genome	189252	189257	TTTTTT
NC_002695.2 Escherichia coli O157:H7 str. Sakai DNA, complete genome	189290	189295	TTTTTT
NC_002695.2 Escherichia coli O157:H7 str. Sakai DNA, complete genome	192171	192176	AAAAAA
NC_002695.2 Escherichia coli O157:H7 str. Sakai DNA, complete genome	192358	192363	TTTTTT
NC_002695.2 Escherichia coli O157:H7 str. Sakai DNA, complete genome	192954	192959	TTTTTT
NC_002695.2 Escherichia coli O157:H7 str. Sakai DNA, complete genome	194413	194418	AAAAAA
NC_002695.2 Escherichia coli O157:H7 str. Sakai DNA, complete genome	194494	194499	AAAAAA
NC_002695.2 Escherichia coli O157:H7 str. Sakai DNA, complete genome	197959	197964	AAAAAA
NC_002695.2 Escherichia coli O157:H7 str. Sakai DNA, complete genome	198185	198192	TTTTTTTT
NC_002695.2 Escherichia coli O157:H7 str. Sakai DNA, complete genome	198239	198244	AAAAAA
NC_002695.2 Escherichia coli O157:H7 str. Sakai DNA, complete genome	198343	198348	AAAAAA
NC_002695.2 Escherichia coli O157:H7 str. Sakai DNA, complete genome	198833	198839	GGGGGGG
NC_002695.2 Escherichia coli O157:H7 str. Sakai DNA, complete genome	201097	201102	GGGGGG
NC_002695.2 Escherichia coli O157:H7 str. Sakai DNA, complete genome	202023	202028	AAAAAA
NC_002695.2 Escherichia coli O157:H7 str. Sakai DNA, complete genome	205567	205572	AAAAAA
NC_002695.2 Escherichia coli O157:H7 str. Sakai DNA, complete genome	205797	205802	AAAAAA
NC_002695.2 Escherichia coli O157:H7 str. Sakai DNA, complete genome	208553	208558	AAAAAA
NC_002695.2 Escherichia coli O157:H7 str. Sakai DNA, complete genome	212098	212103	AAAAAA
NC_002695.2 Escherichia coli O157:H7 str. Sakai DNA, complete genome	212341	212346	AAAAAA
NC_002695.2 Escherichia coli O157:H7 str. Sakai DNA, complete genome	212879	212884	AAAAAA
NC_002695.2 Escherichia coli O157:H7 str. Sakai DNA, complete genome	212963	212968	TTTTTT
NC_002695.2 Escherichia coli O157:H7 str. Sakai DNA, complete genome	213325	213331	TTTTTTT
NC_002695.2 Escherichia coli O157:H7 str. Sakai DNA, complete genome	213498	213503	AAAAAA
NC_002695.2 Escherichia coli O157:H7 str. Sakai DNA, complete genome	215794	215799	GGGGGG
NC_002695.2 Escherichia coli O157:H7 str. Sakai DNA, complete genome	216153	216158	GGGGGG
NC_002695.2 Escherichia coli O157:H7 str. Sakai DNA, complete genome	218608	218613	AAAAAA
NC_002695.2 Escherichia coli O157:H7 str. Sakai DNA, complete genome	219382	219387	TTTTTT
NC_002695.2 Escherichia coli O157:H7 str. Sakai DNA, complete genome	219473	219478	CCCCCC
NC_002695.2 Escherichia coli O157:H7 str. Sakai DNA, complete genome	219983	219988	TTTTTT
NC_002695.2 Escherichia coli O157:H7 str. Sakai DNA, complete genome	220353	220358	AAAAAA
NC_002695.2 Escherichia coli O157:H7 str. Sakai DNA, complete genome	221952	221957	TTTTTT
NC_002695.2 Escherichia coli O157:H7 str. Sakai DNA, complete genome	222160	222166	AAAAAAA
NC_002695.2 Escherichia coli O157:H7 str. Sakai DNA, complete genome	223733	223738	TTTTTT
NC_002695.2 Escherichia coli O157:H7 str. Sakai DNA, complete genome	224875	224880	AAAAAA
NC_002695.2 Escherichia coli O157:H7 str. Sakai DNA, complete genome	226289	226296	AAAAAAAA
NC_002695.2 Escherichia coli O157:H7 str. Sakai DNA, complete genome	226712	226717	AAAAAA
NC_002695.2 Escherichia coli O157:H7 str. Sakai DNA, complete genome	226870	226875	AAAAAA
NC_002695.2 Escherichia coli O157:H7 str. Sakai DNA, complete genome	227768	227773	GGGGGG
NC_002695.2 Escherichia coli O157:H7 str. Sakai DNA, complete genome	228926	228931	AAAAAA
NC_002695.2 Escherichia coli O157:H7 str. Sakai DNA, complete genome	229496	229501	GGGGGG
NC_002695.2 Escherichia coli O157:H7 str. Sakai DNA, complete genome	230510	230515	GGGGGG
NC_002695.2 Escherichia coli O157:H7 str. Sakai DNA, complete genome	231729	231734	GGGGGG
NC_002695.2 Escherichia coli O157:H7 str. Sakai DNA, complete genome	232367	232374	TTTTTTTT
NC_002695.2 Escherichia coli O157:H7 str. Sakai DNA, complete genome	232848	232853	AAAAAA
NC_002695.2 Escherichia coli O157:H7 str. Sakai DNA, complete genome	233226	233231	AAAAAA
NC_002695.2 Escherichia coli O157:H7 str. Sakai DNA, complete genome	234457	234462	AAAAAA
NC_002695.2 Escherichia coli O157:H7 str. Sakai DNA, complete genome	236103	236108	AAAAAA
NC_002695.2 Escherichia coli O157:H7 str. Sakai DNA, complete genome	237174	237179	TTTTTT
NC_002695.2 Escherichia coli O157:H7 str. Sakai DNA, complete genome	237684	237690	AAAAAAA
NC_002695.2 Escherichia coli O157:H7 str. Sakai DNA, complete genome	237738	237743	TTTTTT
NC_002695.2 Escherichia coli O157:H7 str. Sakai DNA, complete genome	239255	239260	TTTTTT
NC_002695.2 Escherichia coli O157:H7 str. Sakai DNA, complete genome	239266	239271	TTTTTT
NC_002695.2 Escherichia coli O157:H7 str. Sakai DNA, complete genome	239293	239298	TTTTTT
NC_002695.2 Escherichia coli O157:H7 str. Sakai DNA, complete genome	240612	240619	TTTTTTTT
NC_002695.2 Escherichia coli O157:H7 str. Sakai DNA, complete genome	240895	240900	AAAAAA
NC_002695.2 Escherichia coli O157:H7 str. Sakai DNA, complete genome	240974	240979	AAAAAA
NC_002695.2 Escherichia coli O157:H7 str. Sakai DNA, complete genome	241638	241643	AAAAAA
NC_002695.2 Escherichia coli O157:H7 str. Sakai DNA, complete genome	241816	241822	TTTTTTT
NC_002695.2 Escherichia coli O157:H7 str. Sakai DNA, complete genome	241883	241889	TTTTTTT
NC_002695.2 Escherichia coli O157:H7 str. Sakai DNA, complete genome	242296	242301	CCCCCC
NC_002695.2 Escherichia coli O157:H7 str. Sakai DNA, complete genome	242456	242461	TTTTTT
NC_002695.2 Escherichia coli O157:H7 str. Sakai DNA, complete genome	242630	242635	TTTTTT
NC_002695.2 Escherichia coli O157:H7 str. Sakai DNA, complete genome	242711	242716	TTTTTT
NC_002695.2 Escherichia coli O157:H7 str. Sakai DNA, complete genome	242804	242809	TTTTTT
NC_002695.2 Escherichia coli O157:H7 str. Sakai DNA, complete genome	243354	243360	TTTTTTT
NC_002695.2 Escherichia coli O157:H7 str. Sakai DNA, complete genome	243367	243373	AAAAAAA
NC_002695.2 Escherichia coli O157:H7 str. Sakai DNA, complete genome	243536	243541	AAAAAA
NC_002695.2 Escherichia coli O157:H7 str. Sakai DNA, complete genome	243825	243831	TTTTTTT
NC_002695.2 Escherichia coli O157:H7 str. Sakai DNA, complete genome	244057	244063	TTTTTTT
NC_002695.2 Escherichia coli O157:H7 str. Sakai DNA, complete genome	250034	250039	TTTTTT
NC_002695.2 Escherichia coli O157:H7 str. Sakai DNA, complete genome	250418	250423	GGGGGG
NC_002695.2 Escherichia coli O157:H7 str. Sakai DNA, complete genome	252146	252151	TTTTTT
NC_002695.2 Escherichia coli O157:H7 str. Sakai DNA, complete genome	252878	252883	TTTTTT
NC_002695.2 Escherichia coli O157:H7 str. Sakai DNA, complete genome	254010	254015	AAAAAA
NC_002695.2 Escherichia coli O157:H7 str. Sakai DNA, complete genome	254064	254070	TTTTTTT
NC_002695.2 Escherichia coli O157:H7 str. Sakai DNA, complete genome	254616	254621	TTTTTT
NC_002695.2 Escherichia coli O157:H7 str. Sakai DNA, complete genome	254824	254829	GGGGGG
NC_002695.2 Escherichia coli O157:H7 str. Sakai DNA, complete genome	254887	254892	TTTTTT
NC_002695.2 Escherichia coli O157:H7 str. Sakai DNA, complete genome	256018	256023	TTTTTT
NC_002695.2 Escherichia coli O157:H7 str. Sakai DNA, complete genome	256458	256464	TTTTTTT
NC_002695.2 Escherichia coli O157:H7 str. Sakai DNA, complete genome	257199	257204	CCCCCC
NC_002695.2 Escherichia coli O157:H7 str. Sakai DNA, complete genome	258795	258801	AAAAAAA
NC_002695.2 Escherichia coli O157:H7 str. Sakai DNA, complete genome	259649	259654	TTTTTT
NC_002695.2 Escherichia coli O157:H7 str. Sakai DNA, complete genome	259937	259942	AAAAAA
NC_002695.2 Escherichia coli O157:H7 str. Sakai DNA, complete genome	263426	263431	TTTTTT
NC_002695.2 Escherichia coli O157:H7 str. Sakai DNA, complete genome	263495	263500	AAAAAA
NC_002695.2 Escherichia coli O157:H7 str. Sakai DNA, complete genome	263696	263701	TTTTTT
NC_002695.2 Escherichia coli O157:H7 str. Sakai DNA, complete genome	264022	264027	AAAAAA
NC_002695.2 Escherichia coli O157:H7 str. Sakai DNA, complete genome	264959	264964	TTTTTT
NC_002695.2 Escherichia coli O157:H7 str. Sakai DNA, complete genome	265382	265387	AAAAAA
NC_002695.2 Escherichia coli O157:H7 str. Sakai DNA, complete genome	266417	266422	AAAAAA
NC_002695.2 Escherichia coli O157:H7 str. Sakai DNA, complete genome	266971	266976	CCCCCC
NC_002695.2 Escherichia coli O157:H7 str. Sakai DNA, complete genome	267013	267018	AAAAAA
NC_002695.2 Escherichia coli O157:H7 str. Sakai DNA, complete genome	270774	270779	GGGGGG
NC_002695.2 Escherichia coli O157:H7 str. Sakai DNA, complete genome	270967	270972	AAAAAA
NC_002695.2 Escherichia coli O157:H7 str. Sakai DNA, complete genome	271310	271315	TTTTTT
NC_002695.2 Escherichia coli O157:H7 str. Sakai DNA, complete genome	271612	271617	AAAAAA
NC_002695.2 Escherichia coli O157:H7 str. Sakai DNA, complete genome	271729	271734	AAAAAA
NC_002695.2 Escherichia coli O157:H7 str. Sakai DNA, complete genome	271809	271814	AAAAAA
NC_002695.2 Escherichia coli O157:H7 str. Sakai DNA, complete genome	272219	272224	TTTTTT
NC_002695.2 Escherichia coli O157:H7 str. Sakai DNA, complete genome	272302	272308	TTTTTTT
NC_002695.2 Escherichia coli O157:H7 str. Sakai DNA, complete genome	272356	272361	TTTTTT
NC_002695.2 Escherichia coli O157:H7 str. Sakai DNA, complete genome	272392	272397	TTTTTT
NC_002695.2 Escherichia coli O157:H7 str. Sakai DNA, complete genome	272402	272407	TTTTTT
NC_002695.2 Escherichia coli O157:H7 str. Sakai DNA, complete genome	272533	272538	TTTTTT
NC_002695.2 Escherichia coli O157:H7 str. Sakai DNA, complete genome	272662	272667	AAAAAA
NC_002695.2 Escherichia coli O157:H7 str. Sakai DNA, complete genome	272820	272825	TTTTTT
NC_002695.2 Escherichia coli O157:H7 str. Sakai DNA, complete genome	275567	275573	TTTTTTT
NC_002695.2 Escherichia coli O157:H7 str. Sakai DNA, complete genome	275684	275689	AAAAAA
NC_002695.2 Escherichia coli O157:H7 str. Sakai DNA, complete genome	275716	275721	AAAAAA
NC_002695.2 Escherichia coli O157:H7 str. Sakai DNA, complete genome	275804	275809	TTTTTT
NC_002695.2 Escherichia coli O157:H7 str. Sakai DNA, complete genome	275837	275842	AAAAAA
NC_002695.2 Escherichia coli O157:H7 str. Sakai DNA, complete genome	276756	276761	AAAAAA
NC_002695.2 Escherichia coli O157:H7 str. Sakai DNA, complete genome	276968	276973	AAAAAA
NC_002695.2 Escherichia coli O157:H7 str. Sakai DNA, complete genome	277389	277394	GGGGGG
NC_002695.2 Escherichia coli O157:H7 str. Sakai DNA, complete genome	277413	277418	TTTTTT
NC_002695.2 Escherichia coli O157:H7 str. Sakai DNA, complete genome	280860	280865	TTTTTT
NC_002695.2 Escherichia coli O157:H7 str. Sakai DNA, complete genome	285129	285134	TTTTTT
NC_002695.2 Escherichia coli O157:H7 str. Sakai DNA, complete genome	288103	288108	AAAAAA
NC_002695.2 Escherichia coli O157:H7 str. Sakai DNA, complete genome	288897	288902	GGGGGG
NC_002695.2 Escherichia coli O157:H7 str. Sakai DNA, complete genome	290947	290952	TTTTTT
NC_002695.2 Escherichia coli O157:H7 str. Sakai DNA, complete genome	291177	291184	TTTTTTTT
NC_002695.2 Escherichia coli O157:H7 str. Sakai DNA, complete genome	292288	292293	TTTTTT
NC_002695.2 Escherichia coli O157:H7 str. Sakai DNA, complete genome	293057	293062	CCCCCC
NC_002695.2 Escherichia coli O157:H7 str. Sakai DNA, complete genome	295756	295761	AAAAAA
NC_002695.2 Escherichia coli O157:H7 str. Sakai DNA, complete genome	296930	296935	TTTTTT
NC_002695.2 Escherichia coli O157:H7 str. Sakai DNA, complete genome	298682	298688	AAAAAAA
NC_002695.2 Escherichia coli O157:H7 str. Sakai DNA, complete genome	298700	298705	AAAAAA
NC_002695.2 Escherichia coli O157:H7 str. Sakai DNA, complete genome	300098	300103	TTTTTT
NC_002695.2 Escherichia coli O157:H7 str. Sakai DNA, complete genome	300454	300459	TTTTTT
NC_002695.2 Escherichia coli O157:H7 str. Sakai DNA, complete genome	300850	300856	TTTTTTT
NC_002695.2 Escherichia coli O157:H7 str. Sakai DNA, complete genome	301351	301356	TTTTTT
NC_002695.2 Escherichia coli O157:H7 str. Sakai DNA, complete genome	301368	301373	TTTTTT
NC_002695.2 Escherichia coli O157:H7 str. Sakai DNA, complete genome	301775	301780	AAAAAA
NC_002695.2 Escherichia coli O157:H7 str. Sakai DNA, complete genome	301822	301828	AAAAAAA
NC_002695.2 Escherichia coli O157:H7 str. Sakai DNA, complete genome	302246	302251	TTTTTT
NC_002695.2 Escherichia coli O157:H7 str. Sakai DNA, complete genome	302332	302337	AAAAAA
NC_002695.2 Escherichia coli O157:H7 str. Sakai DNA, complete genome	302577	302583	TTTTTTT
NC_002695.2 Escherichia coli O157:H7 str. Sakai DNA, complete genome	302640	302645	TTTTTT
NC_002695.2 Escherichia coli O157:H7 str. Sakai DNA, complete genome	302872	302878	TTTTTTT
NC_002695.2 Escherichia coli O157:H7 str. Sakai DNA, complete genome	302937	302943	AAAAAAA
NC_002695.2 Escherichia coli O157:H7 str. Sakai DNA, complete genome	303251	303256	GGGGGG
NC_002695.2 Escherichia coli O157:H7 str. Sakai DNA, complete genome	303313	303318	AAAAAA
NC_002695.2 Escherichia coli O157:H7 str. Sakai DNA, complete genome	303879	303884	AAAAAA
NC_002695.2 Escherichia coli O157:H7 str. Sakai DNA, complete genome	304509	304514	GGGGGG
NC_002695.2 Escherichia coli O157:H7 str. Sakai DNA, complete genome	304558	304563	TTTTTT
NC_002695.2 Escherichia coli O157:H7 str. Sakai DNA, complete genome	306391	306396	AAAAAA
NC_002695.2 Escherichia coli O157:H7 str. Sakai DNA, complete genome	306629	306634	TTTTTT
NC_002695.2 Escherichia coli O157:H7 str. Sakai DNA, complete genome	307027	307032	AAAAAA
NC_002695.2 Escherichia coli O157:H7 str. Sakai DNA, complete genome	307543	307549	TTTTTTT
NC_002695.2 Escherichia coli O157:H7 str. Sakai DNA, complete genome	307566	307572	TTTTTTT
NC_002695.2 Escherichia coli O157:H7 str. Sakai DNA, complete genome	308995	309000	TTTTTT
NC_002695.2 Escherichia coli O157:H7 str. Sakai DNA, complete genome	309022	309027	TTTTTT
NC_002695.2 Escherichia coli O157:H7 str. Sakai DNA, complete genome	309090	309095	GGGGGG
NC_002695.2 Escherichia coli O157:H7 str. Sakai DNA, complete genome	309217	309222	TTTTTT
NC_002695.2 Escherichia coli O157:H7 str. Sakai DNA, complete genome	309875	309881	GGGGGGG
NC_002695.2 Escherichia coli O157:H7 str. Sakai DNA, complete genome	310698	310703	TTTTTT
NC_002695.2 Escherichia coli O157:H7 str. Sakai DNA, complete genome	312202	312208	AAAAAAA
NC_002695.2 Escherichia coli O157:H7 str. Sakai DNA, complete genome	312295	312300	TTTTTT
NC_002695.2 Escherichia coli O157:H7 str. Sakai DNA, complete genome	312361	312366	AAAAAA
NC_002695.2 Escherichia coli O157:H7 str. Sakai DNA, complete genome	312399	312405	AAAAAAA
NC_002695.2 Escherichia coli O157:H7 str. Sakai DNA, complete genome	312443	312449	AAAAAAA
NC_002695.2 Escherichia coli O157:H7 str. Sakai DNA, complete genome	312475	312480	TTTTTT
NC_002695.2 Escherichia coli O157:H7 str. Sakai DNA, complete genome	312599	312605	AAAAAAA
NC_002695.2 Escherichia coli O157:H7 str. Sakai DNA, complete genome	312939	312944	AAAAAA
NC_002695.2 Escherichia coli O157:H7 str. Sakai DNA, complete genome	313129	313134	TTTTTT
NC_002695.2 Escherichia coli O157:H7 str. Sakai DNA, complete genome	313290	313295	AAAAAA
NC_002695.2 Escherichia coli O157:H7 str. Sakai DNA, complete genome	313411	313416	AAAAAA
NC_002695.2 Escherichia coli O157:H7 str. Sakai DNA, complete genome	313460	313466	TTTTTTT
NC_002695.2 Escherichia coli O157:H7 str. Sakai DNA, complete genome	313616	313621	AAAAAA
NC_002695.2 Escherichia coli O157:H7 str. Sakai DNA, complete genome	313780	313785	TTTTTT
NC_002695.2 Escherichia coli O157:H7 str. Sakai DNA, complete genome	313914	313920	TTTTTTT
NC_002695.2 Escherichia coli O157:H7 str. Sakai DNA, complete genome	314061	314066	AAAAAA
NC_002695.2 Escherichia coli O157:H7 str. Sakai DNA, complete genome	314080	314086	AAAAAAA
NC_002695.2 Escherichia coli O157:H7 str. Sakai DNA, complete genome	314440	314447	AAAAAAAA
NC_002695.2 Escherichia coli O157:H7 str. Sakai DNA, complete genome	314474	314479	TTTTTT
NC_002695.2 Escherichia coli O157:H7 str. Sakai DNA, complete genome	314579	314584	AAAAAA
NC_002695.2 Escherichia coli O157:H7 str. Sakai DNA, complete genome	314611	314616	AAAAAA
NC_002695.2 Escherichia coli O157:H7 str. Sakai DNA, complete genome	315458	315463	CCCCCC
NC_002695.2 Escherichia coli O157:H7 str. Sakai DNA, complete genome	315631	315636	AAAAAA
NC_002695.2 Escherichia coli O157:H7 str. Sakai DNA, complete genome	315666	315672	TTTTTTT
NC_002695.2 Escherichia coli O157:H7 str. Sakai DNA, complete genome	316999	317004	TTTTTT
NC_002695.2 Escherichia coli O157:H7 str. Sakai DNA, complete genome	317448	317455	AAAAAAAA
NC_002695.2 Escherichia coli O157:H7 str. Sakai DNA, complete genome	317551	317556	TTTTTT
NC_002695.2 Escherichia coli O157:H7 str. Sakai DNA, complete genome	317569	317575	TTTTTTT
NC_002695.2 Escherichia coli O157:H7 str. Sakai DNA, complete genome	317594	317599	TTTTTT
NC_002695.2 Escherichia coli O157:H7 str. Sakai DNA, complete genome	318089	318094	AAAAAA
NC_002695.2 Escherichia coli O157:H7 str. Sakai DNA, complete genome	318594	318600	TTTTTTT
NC_002695.2 Escherichia coli O157:H7 str. Sakai DNA, complete genome	322120	322125	AAAAAA
NC_002695.2 Escherichia coli O157:H7 str. Sakai DNA, complete genome	322150	322156	CCCCCCC
NC_002695.2 Escherichia coli O157:H7 str. Sakai DNA, complete genome	322890	322895	TTTTTT
NC_002695.2 Escherichia coli O157:H7 str. Sakai DNA, complete genome	323184	323189	TTTTTT
NC_002695.2 Escherichia coli O157:H7 str. Sakai DNA, complete genome	323209	323214	AAAAAA
NC_002695.2 Escherichia coli O157:H7 str. Sakai DNA, complete genome	323344	323351	AAAAAAAA
NC_002695.2 Escherichia coli O157:H7 str. Sakai DNA, complete genome	323382	323388	AAAAAAA
NC_002695.2 Escherichia coli O157:H7 str. Sakai DNA, complete genome	323390	323395	TTTTTT
NC_002695.2 Escherichia coli O157:H7 str. Sakai DNA, complete genome	325757	325762	TTTTTT
NC_002695.2 Escherichia coli O157:H7 str. Sakai DNA, complete genome	326378	326383	TTTTTT
NC_002695.2 Escherichia coli O157:H7 str. Sakai DNA, complete genome	326767	326773	TTTTTTT
NC_002695.2 Escherichia coli O157:H7 str. Sakai DNA, complete genome	327577	327582	TTTTTT
NC_002695.2 Escherichia coli O157:H7 str. Sakai DNA, complete genome	335041	335046	TTTTTT
NC_002695.2 Escherichia coli O157:H7 str. Sakai DNA, complete genome	335497	335502	GGGGGG
NC_002695.2 Escherichia coli O157:H7 str. Sakai DNA, complete genome	337356	337361	GGGGGG
NC_002695.2 Escherichia coli O157:H7 str. Sakai DNA, complete genome	340340	340345	TTTTTT
NC_002695.2 Escherichia coli O157:H7 str. Sakai DNA, complete genome	342000	342005	GGGGGG
NC_002695.2 Escherichia coli O157:H7 str. Sakai DNA, complete genome	342461	342466	GGGGGG
NC_002695.2 Escherichia coli O157:H7 str. Sakai DNA, complete genome	342726	342731	TTTTTT
NC_002695.2 Escherichia coli O157:H7 str. Sakai DNA, complete genome	342964	342969	TTTTTT
NC_002695.2 Escherichia coli O157:H7 str. Sakai DNA, complete genome	343070	343077	TTTTTTTT
NC_002695.2 Escherichia coli O157:H7 str. Sakai DNA, complete genome	343129	343134	TTTTTT
NC_002695.2 Escherichia coli O157:H7 str. Sakai DNA, complete genome	343883	343889	TTTTTTT
NC_002695.2 Escherichia coli O157:H7 str. Sakai DNA, complete genome	343948	343953	AAAAAA
NC_002695.2 Escherichia coli O157:H7 str. Sakai DNA, complete genome	343966	343971	TTTTTT
NC_002695.2 Escherichia coli O157:H7 str. Sakai DNA, complete genome	344109	344115	AAAAAAA
NC_002695.2 Escherichia coli O157:H7 str. Sakai DNA, complete genome	344789	344794	TTTTTT
NC_002695.2 Escherichia coli O157:H7 str. Sakai DNA, complete genome	348118	348123	AAAAAA
NC_002695.2 Escherichia coli O157:H7 str. Sakai DNA, complete genome	348174	348179	TTTTTT
NC_002695.2 Escherichia coli O157:H7 str. Sakai DNA, complete genome	348991	348996	CCCCCC
NC_002695.2 Escherichia coli O157:H7 str. Sakai DNA, complete genome	349067	349072	TTTTTT
NC_002695.2 Escherichia coli O157:H7 str. Sakai DNA, complete genome	349160	349165	AAAAAA
NC_002695.2 Escherichia coli O157:H7 str. Sakai DNA, complete genome	349665	349670	TTTTTT
NC_002695.2 Escherichia coli O157:H7 str. Sakai DNA, complete genome	349848	349853	TTTTTT
NC_002695.2 Escherichia coli O157:H7 str. Sakai DNA, complete genome	349855	349860	TTTTTT
NC_002695.2 Escherichia coli O157:H7 str. Sakai DNA, complete genome	350789	350795	TTTTTTT
NC_002695.2 Escherichia coli O157:H7 str. Sakai DNA, complete genome	351672	351677	GGGGGG
NC_002695.2 Escherichia coli O157:H7 str. Sakai DNA, complete genome	353547	353552	AAAAAA
NC_002695.2 Escherichia coli O157:H7 str. Sakai DNA, complete genome	354595	354600	AAAAAA
NC_002695.2 Escherichia coli O157:H7 str. Sakai DNA, complete genome	356029	356034	GGGGGG
NC_002695.2 Escherichia coli O157:H7 str. Sakai DNA, complete genome	357937	357942	GGGGGG
NC_002695.2 Escherichia coli O157:H7 str. Sakai DNA, complete genome	358808	358813	AAAAAA
NC_002695.2 Escherichia coli O157:H7 str. Sakai DNA, complete genome	359320	359325	TTTTTT
NC_002695.2 Escherichia coli O157:H7 str. Sakai DNA, complete genome	359705	359711	AAAAAAA
NC_002695.2 Escherichia coli O157:H7 str. Sakai DNA, complete genome	361271	361276	TTTTTT
NC_002695.2 Escherichia coli O157:H7 str. Sakai DNA, complete genome	362484	362489	AAAAAA
NC_002695.2 Escherichia coli O157:H7 str. Sakai DNA, complete genome	363241	363246	TTTTTT
NC_002695.2 Escherichia coli O157:H7 str. Sakai DNA, complete genome	363895	363901	TTTTTTT
NC_002695.2 Escherichia coli O157:H7 str. Sakai DNA, complete genome	364002	364008	TTTTTTT
NC_002695.2 Escherichia coli O157:H7 str. Sakai DNA, complete genome	364234	364239	AAAAAA
NC_002695.2 Escherichia coli O157:H7 str. Sakai DNA, complete genome	364274	364279	GGGGGG
NC_002695.2 Escherichia coli O157:H7 str. Sakai DNA, complete genome	365168	365173	AAAAAA
NC_002695.2 Escherichia coli O157:H7 str. Sakai DNA, complete genome	365621	365626	AAAAAA
NC_002695.2 Escherichia coli O157:H7 str. Sakai DNA, complete genome	366909	366914	TTTTTT
NC_002695.2 Escherichia coli O157:H7 str. Sakai DNA, complete genome	367446	367452	TTTTTTT
NC_002695.2 Escherichia coli O157:H7 str. Sakai DNA, complete genome	367489	367494	AAAAAA
NC_002695.2 Escherichia coli O157:H7 str. Sakai DNA, complete genome	367529	367534	TTTTTT
NC_002695.2 Escherichia coli O157:H7 str. Sakai DNA, complete genome	367810	367815	AAAAAA
NC_002695.2 Escherichia coli O157:H7 str. Sakai DNA, complete genome	369094	369099	TTTTTT
NC_002695.2 Escherichia coli O157:H7 str. Sakai DNA, complete genome	369255	369260	TTTTTT
NC_002695.2 Escherichia coli O157:H7 str. Sakai DNA, complete genome	369661	369666	TTTTTT
NC_002695.2 Escherichia coli O157:H7 str. Sakai DNA, complete genome	369753	369758	TTTTTT
NC_002695.2 Escherichia coli O157:H7 str. Sakai DNA, complete genome	370085	370090	AAAAAA
NC_002695.2 Escherichia coli O157:H7 str. Sakai DNA, complete genome	370453	370458	GGGGGG
NC_002695.2 Escherichia coli O157:H7 str. Sakai DNA, complete genome	370495	370501	TTTTTTT
NC_002695.2 Escherichia coli O157:H7 str. Sakai DNA, complete genome	370509	370514	TTTTTT
NC_002695.2 Escherichia coli O157:H7 str. Sakai DNA, complete genome	371539	371545	TTTTTTT
NC_002695.2 Escherichia coli O157:H7 str. Sakai DNA, complete genome	371612	371619	TTTTTTTT
NC_002695.2 Escherichia coli O157:H7 str. Sakai DNA, complete genome	371817	371823	AAAAAAA
NC_002695.2 Escherichia coli O157:H7 str. Sakai DNA, complete genome	372185	372190	AAAAAA
NC_002695.2 Escherichia coli O157:H7 str. Sakai DNA, complete genome	372264	372269	TTTTTT
NC_002695.2 Escherichia coli O157:H7 str. Sakai DNA, complete genome	372367	372372	AAAAAA
NC_002695.2 Escherichia coli O157:H7 str. Sakai DNA, complete genome	372600	372605	TTTTTT
NC_002695.2 Escherichia coli O157:H7 str. Sakai DNA, complete genome	372668	372675	TTTTTTTT
NC_002695.2 Escherichia coli O157:H7 str. Sakai DNA, complete genome	372678	372683	TTTTTT
NC_002695.2 Escherichia coli O157:H7 str. Sakai DNA, complete genome	372743	372749	TTTTTTT
NC_002695.2 Escherichia coli O157:H7 str. Sakai DNA, complete genome	372831	372836	AAAAAA
NC_002695.2 Escherichia coli O157:H7 str. Sakai DNA, complete genome	373244	373250	TTTTTTT
NC_002695.2 Escherichia coli O157:H7 str. Sakai DNA, complete genome	375691	375696	TTTTTT
NC_002695.2 Escherichia coli O157:H7 str. Sakai DNA, complete genome	376224	376229	TTTTTT
NC_002695.2 Escherichia coli O157:H7 str. Sakai DNA, complete genome	378709	378714	AAAAAA
NC_002695.2 Escherichia coli O157:H7 str. Sakai DNA, complete genome	379222	379227	AAAAAA
NC_002695.2 Escherichia coli O157:H7 str. Sakai DNA, complete genome	379511	379516	GGGGGG
NC_002695.2 Escherichia coli O157:H7 str. Sakai DNA, complete genome	379818	379823	AAAAAA
NC_002695.2 Escherichia coli O157:H7 str. Sakai DNA, complete genome	380534	380539	AAAAAA
NC_002695.2 Escherichia coli O157:H7 str. Sakai DNA, complete genome	382208	382213	AAAAAA
NC_002695.2 Escherichia coli O157:H7 str. Sakai DNA, complete genome	383882	383888	TTTTTTT
NC_002695.2 Escherichia coli O157:H7 str. Sakai DNA, complete genome	384097	384102	TTTTTT
NC_002695.2 Escherichia coli O157:H7 str. Sakai DNA, complete genome	384474	384479	TTTTTT
NC_002695.2 Escherichia coli O157:H7 str. Sakai DNA, complete genome	385053	385058	TTTTTT
NC_002695.2 Escherichia coli O157:H7 str. Sakai DNA, complete genome	385192	385198	AAAAAAA
NC_002695.2 Escherichia coli O157:H7 str. Sakai DNA, complete genome	385287	385292	TTTTTT
NC_002695.2 Escherichia coli O157:H7 str. Sakai DNA, complete genome	385716	385721	AAAAAA
NC_002695.2 Escherichia coli O157:H7 str. Sakai DNA, complete genome	386136	386141	AAAAAA
NC_002695.2 Escherichia coli O157:H7 str. Sakai DNA, complete genome	386786	386791	AAAAAA
NC_002695.2 Escherichia coli O157:H7 str. Sakai DNA, complete genome	387002	387007	TTTTTT
NC_002695.2 Escherichia coli O157:H7 str. Sakai DNA, complete genome	388183	388188	AAAAAA
NC_002695.2 Escherichia coli O157:H7 str. Sakai DNA, complete genome	390145	390150	AAAAAA
NC_002695.2 Escherichia coli O157:H7 str. Sakai DNA, complete genome	390332	390337	AAAAAA
NC_002695.2 Escherichia coli O157:H7 str. Sakai DNA, complete genome	390962	390967	GGGGGG
NC_002695.2 Escherichia coli O157:H7 str. Sakai DNA, complete genome	392074	392079	AAAAAA
NC_002695.2 Escherichia coli O157:H7 str. Sakai DNA, complete genome	394297	394302	AAAAAA
NC_002695.2 Escherichia coli O157:H7 str. Sakai DNA, complete genome	394729	394734	TTTTTT
NC_002695.2 Escherichia coli O157:H7 str. Sakai DNA, complete genome	394875	394880	TTTTTT
NC_002695.2 Escherichia coli O157:H7 str. Sakai DNA, complete genome	395370	395375	AAAAAA
NC_002695.2 Escherichia coli O157:H7 str. Sakai DNA, complete genome	397582	397587	AAAAAA
NC_002695.2 Escherichia coli O157:H7 str. Sakai DNA, complete genome	397814	397819	AAAAAA
NC_002695.2 Escherichia coli O157:H7 str. Sakai DNA, complete genome	398541	398546	AAAAAA
NC_002695.2 Escherichia coli O157:H7 str. Sakai DNA, complete genome	400106	400111	AAAAAA
NC_002695.2 Escherichia coli O157:H7 str. Sakai DNA, complete genome	400630	400635	AAAAAA
NC_002695.2 Escherichia coli O157:H7 str. Sakai DNA, complete genome	401511	401516	AAAAAA
NC_002695.2 Escherichia coli O157:H7 str. Sakai DNA, complete genome	401794	401799	TTTTTT
NC_002695.2 Escherichia coli O157:H7 str. Sakai DNA, complete genome	401836	401841	AAAAAA
NC_002695.2 Escherichia coli O157:H7 str. Sakai DNA, complete genome	401876	401884	AAAAAAAAA
NC_002695.2 Escherichia coli O157:H7 str. Sakai DNA, complete genome	401932	401938	AAAAAAA
NC_002695.2 Escherichia coli O157:H7 str. Sakai DNA, complete genome	402212	402217	AAAAAA
NC_002695.2 Escherichia coli O157:H7 str. Sakai DNA, complete genome	402603	402608	AAAAAA
NC_002695.2 Escherichia coli O157:H7 str. Sakai DNA, complete genome	402654	402659	AAAAAA
NC_002695.2 Escherichia coli O157:H7 str. Sakai DNA, complete genome	402779	402784	AAAAAA
NC_002695.2 Escherichia coli O157:H7 str. Sakai DNA, complete genome	402942	402948	AAAAAAA
NC_002695.2 Escherichia coli O157:H7 str. Sakai DNA, complete genome	403296	403301	AAAAAA
NC_002695.2 Escherichia coli O157:H7 str. Sakai DNA, complete genome	403361	403366	AAAAAA
NC_002695.2 Escherichia coli O157:H7 str. Sakai DNA, complete genome	404771	404776	TTTTTT
NC_002695.2 Escherichia coli O157:H7 str. Sakai DNA, complete genome	406271	406276	AAAAAA
NC_002695.2 Escherichia coli O157:H7 str. Sakai DNA, complete genome	406476	406481	AAAAAA
NC_002695.2 Escherichia coli O157:H7 str. Sakai DNA, complete genome	407802	407807	AAAAAA
NC_002695.2 Escherichia coli O157:H7 str. Sakai DNA, complete genome	409644	409649	AAAAAA
NC_002695.2 Escherichia coli O157:H7 str. Sakai DNA, complete genome	410142	410147	AAAAAA
NC_002695.2 Escherichia coli O157:H7 str. Sakai DNA, complete genome	411775	411780	CCCCCC
NC_002695.2 Escherichia coli O157:H7 str. Sakai DNA, complete genome	411803	411808	AAAAAA
NC_002695.2 Escherichia coli O157:H7 str. Sakai DNA, complete genome	411866	411871	TTTTTT
NC_002695.2 Escherichia coli O157:H7 str. Sakai DNA, complete genome	416335	416340	AAAAAA
NC_002695.2 Escherichia coli O157:H7 str. Sakai DNA, complete genome	418267	418272	TTTTTT
NC_002695.2 Escherichia coli O157:H7 str. Sakai DNA, complete genome	418437	418442	GGGGGG
NC_002695.2 Escherichia coli O157:H7 str. Sakai DNA, complete genome	418562	418567	TTTTTT
NC_002695.2 Escherichia coli O157:H7 str. Sakai DNA, complete genome	419894	419899	AAAAAA
NC_002695.2 Escherichia coli O157:H7 str. Sakai DNA, complete genome	419940	419945	TTTTTT
NC_002695.2 Escherichia coli O157:H7 str. Sakai DNA, complete genome	420758	420763	TTTTTT
NC_002695.2 Escherichia coli O157:H7 str. Sakai DNA, complete genome	421514	421519	TTTTTT
NC_002695.2 Escherichia coli O157:H7 str. Sakai DNA, complete genome	425176	425181	TTTTTT
NC_002695.2 Escherichia coli O157:H7 str. Sakai DNA, complete genome	427126	427131	AAAAAA
NC_002695.2 Escherichia coli O157:H7 str. Sakai DNA, complete genome	432426	432431	AAAAAA
NC_002695.2 Escherichia coli O157:H7 str. Sakai DNA, complete genome	432478	432483	AAAAAA
NC_002695.2 Escherichia coli O157:H7 str. Sakai DNA, complete genome	433717	433722	TTTTTT
NC_002695.2 Escherichia coli O157:H7 str. Sakai DNA, complete genome	435025	435030	AAAAAA
NC_002695.2 Escherichia coli O157:H7 str. Sakai DNA, complete genome	435055	435060	AAAAAA
NC_002695.2 Escherichia coli O157:H7 str. Sakai DNA, complete genome	437590	437595	TTTTTT
NC_002695.2 Escherichia coli O157:H7 str. Sakai DNA, complete genome	438015	438020	GGGGGG
NC_002695.2 Escherichia coli O157:H7 str. Sakai DNA, complete genome	438042	438047	CCCCCC
NC_002695.2 Escherichia coli O157:H7 str. Sakai DNA, complete genome	441815	441820	CCCCCC
NC_002695.2 Escherichia coli O157:H7 str. Sakai DNA, complete genome	442655	442660	AAAAAA
NC_002695.2 Escherichia coli O157:H7 str. Sakai DNA, complete genome	443318	443324	AAAAAAA
NC_002695.2 Escherichia coli O157:H7 str. Sakai DNA, complete genome	444351	444356	TTTTTT
NC_002695.2 Escherichia coli O157:H7 str. Sakai DNA, complete genome	444722	444727	AAAAAA
NC_002695.2 Escherichia coli O157:H7 str. Sakai DNA, complete genome	444761	444766	GGGGGG
NC_002695.2 Escherichia coli O157:H7 str. Sakai DNA, complete genome	445104	445109	GGGGGG
NC_002695.2 Escherichia coli O157:H7 str. Sakai DNA, complete genome	446129	446135	TTTTTTT
NC_002695.2 Escherichia coli O157:H7 str. Sakai DNA, complete genome	447549	447554	AAAAAA
NC_002695.2 Escherichia coli O157:H7 str. Sakai DNA, complete genome	450890	450895	TTTTTT
NC_002695.2 Escherichia coli O157:H7 str. Sakai DNA, complete genome	455938	455943	AAAAAA
NC_002695.2 Escherichia coli O157:H7 str. Sakai DNA, complete genome	456046	456051	AAAAAA
NC_002695.2 Escherichia coli O157:H7 str. Sakai DNA, complete genome	456430	456435	TTTTTT
NC_002695.2 Escherichia coli O157:H7 str. Sakai DNA, complete genome	456452	456457	TTTTTT
NC_002695.2 Escherichia coli O157:H7 str. Sakai DNA, complete genome	456509	456515	GGGGGGG
NC_002695.2 Escherichia coli O157:H7 str. Sakai DNA, complete genome	456594	456599	TTTTTT
NC_002695.2 Escherichia coli O157:H7 str. Sakai DNA, complete genome	460627	460632	TTTTTT
NC_002695.2 Escherichia coli O157:H7 str. Sakai DNA, complete genome	460916	460922	TTTTTTT
NC_002695.2 Escherichia coli O157:H7 str. Sakai DNA, complete genome	461053	461058	AAAAAA
NC_002695.2 Escherichia coli O157:H7 str. Sakai DNA, complete genome	461494	461499	TTTTTT
NC_002695.2 Escherichia coli O157:H7 str. Sakai DNA, complete genome	461718	461723	AAAAAA
NC_002695.2 Escherichia coli O157:H7 str. Sakai DNA, complete genome	461803	461808	TTTTTT
NC_002695.2 Escherichia coli O157:H7 str. Sakai DNA, complete genome	461863	461869	AAAAAAA
NC_002695.2 Escherichia coli O157:H7 str. Sakai DNA, complete genome	462979	462985	TTTTTTT
NC_002695.2 Escherichia coli O157:H7 str. Sakai DNA, complete genome	463101	463107	TTTTTTT
NC_002695.2 Escherichia coli O157:H7 str. Sakai DNA, complete genome	463260	463265	AAAAAA
NC_002695.2 Escherichia coli O157:H7 str. Sakai DNA, complete genome	463519	463524	AAAAAA
NC_002695.2 Escherichia coli O157:H7 str. Sakai DNA, complete genome	466085	466090	TTTTTT
NC_002695.2 Escherichia coli O157:H7 str. Sakai DNA, complete genome	466918	466923	AAAAAA
NC_002695.2 Escherichia coli O157:H7 str. Sakai DNA, complete genome	467713	467718	AAAAAA
NC_002695.2 Escherichia coli O157:H7 str. Sakai DNA, complete genome	468324	468329	TTTTTT
NC_002695.2 Escherichia coli O157:H7 str. Sakai DNA, complete genome	468424	468429	TTTTTT
NC_002695.2 Escherichia coli O157:H7 str. Sakai DNA, complete genome	469390	469395	AAAAAA
NC_002695.2 Escherichia coli O157:H7 str. Sakai DNA, complete genome	471089	471094	AAAAAA
NC_002695.2 Escherichia coli O157:H7 str. Sakai DNA, complete genome	471669	471674	TTTTTT
NC_002695.2 Escherichia coli O157:H7 str. Sakai DNA, complete genome	471887	471892	TTTTTT
NC_002695.2 Escherichia coli O157:H7 str. Sakai DNA, complete genome	472211	472217	AAAAAAA
NC_002695.2 Escherichia coli O157:H7 str. Sakai DNA, complete genome	472980	472985	GGGGGG
NC_002695.2 Escherichia coli O157:H7 str. Sakai DNA, complete genome	473138	473143	AAAAAA
NC_002695.2 Escherichia coli O157:H7 str. Sakai DNA, complete genome	474140	474145	AAAAAA
NC_002695.2 Escherichia coli O157:H7 str. Sakai DNA, complete genome	474458	474463	TTTTTT
NC_002695.2 Escherichia coli O157:H7 str. Sakai DNA, complete genome	478994	478999	TTTTTT
NC_002695.2 Escherichia coli O157:H7 str. Sakai DNA, complete genome	479616	479621	TTTTTT
NC_002695.2 Escherichia coli O157:H7 str. Sakai DNA, complete genome	479949	479954	TTTTTT
NC_002695.2 Escherichia coli O157:H7 str. Sakai DNA, complete genome	480129	480134	AAAAAA
NC_002695.2 Escherichia coli O157:H7 str. Sakai DNA, complete genome	480489	480494	TTTTTT
NC_002695.2 Escherichia coli O157:H7 str. Sakai DNA, complete genome	480759	480764	AAAAAA
NC_002695.2 Escherichia coli O157:H7 str. Sakai DNA, complete genome	481264	481269	TTTTTT
NC_002695.2 Escherichia coli O157:H7 str. Sakai DNA, complete genome	482938	482943	TTTTTT
NC_002695.2 Escherichia coli O157:H7 str. Sakai DNA, complete genome	484870	484875	TTTTTT
NC_002695.2 Escherichia coli O157:H7 str. Sakai DNA, complete genome	485297	485302	GGGGGG
NC_002695.2 Escherichia coli O157:H7 str. Sakai DNA, complete genome	486370	486375	AAAAAA
NC_002695.2 Escherichia coli O157:H7 str. Sakai DNA, complete genome	486601	486607	AAAAAAA
NC_002695.2 Escherichia coli O157:H7 str. Sakai DNA, complete genome	486668	486673	AAAAAA
NC_002695.2 Escherichia coli O157:H7 str. Sakai DNA, complete genome	486684	486689	AAAAAA
NC_002695.2 Escherichia coli O157:H7 str. Sakai DNA, complete genome	487189	487194	CCCCCC
NC_002695.2 Escherichia coli O157:H7 str. Sakai DNA, complete genome	487343	487348	AAAAAA
NC_002695.2 Escherichia coli O157:H7 str. Sakai DNA, complete genome	487366	487372	AAAAAAA
NC_002695.2 Escherichia coli O157:H7 str. Sakai DNA, complete genome	487427	487433	AAAAAAA
NC_002695.2 Escherichia coli O157:H7 str. Sakai DNA, complete genome	487526	487533	AAAAAAAA
NC_002695.2 Escherichia coli O157:H7 str. Sakai DNA, complete genome	487542	487547	TTTTTT
NC_002695.2 Escherichia coli O157:H7 str. Sakai DNA, complete genome	487939	487944	AAAAAA
NC_002695.2 Escherichia coli O157:H7 str. Sakai DNA, complete genome	488539	488544	AAAAAA
NC_002695.2 Escherichia coli O157:H7 str. Sakai DNA, complete genome	488569	488574	GGGGGG
NC_002695.2 Escherichia coli O157:H7 str. Sakai DNA, complete genome	489641	489646	TTTTTT
NC_002695.2 Escherichia coli O157:H7 str. Sakai DNA, complete genome	489762	489767	AAAAAA
NC_002695.2 Escherichia coli O157:H7 str. Sakai DNA, complete genome	490923	490928	TTTTTT
NC_002695.2 Escherichia coli O157:H7 str. Sakai DNA, complete genome	491455	491460	AAAAAA
NC_002695.2 Escherichia coli O157:H7 str. Sakai DNA, complete genome	494130	494136	AAAAAAA
NC_002695.2 Escherichia coli O157:H7 str. Sakai DNA, complete genome	494159	494166	TTTTTTTT
NC_002695.2 Escherichia coli O157:H7 str. Sakai DNA, complete genome	494875	494880	AAAAAA
NC_002695.2 Escherichia coli O157:H7 str. Sakai DNA, complete genome	496069	496074	TTTTTT
NC_002695.2 Escherichia coli O157:H7 str. Sakai DNA, complete genome	496260	496266	TTTTTTT
NC_002695.2 Escherichia coli O157:H7 str. Sakai DNA, complete genome	498744	498749	CCCCCC
NC_002695.2 Escherichia coli O157:H7 str. Sakai DNA, complete genome	498865	498870	CCCCCC
NC_002695.2 Escherichia coli O157:H7 str. Sakai DNA, complete genome	499865	499870	TTTTTT
NC_002695.2 Escherichia coli O157:H7 str. Sakai DNA, complete genome	501785	501790	TTTTTT
NC_002695.2 Escherichia coli O157:H7 str. Sakai DNA, complete genome	501844	501849	AAAAAA
NC_002695.2 Escherichia coli O157:H7 str. Sakai DNA, complete genome	501873	501878	TTTTTT
NC_002695.2 Escherichia coli O157:H7 str. Sakai DNA, complete genome	502716	502721	AAAAAA
NC_002695.2 Escherichia coli O157:H7 str. Sakai DNA, complete genome	502978	502984	AAAAAAA
NC_002695.2 Escherichia coli O157:H7 str. Sakai DNA, complete genome	505380	505385	TTTTTT
NC_002695.2 Escherichia coli O157:H7 str. Sakai DNA, complete genome	505590	505595	TTTTTT
NC_002695.2 Escherichia coli O157:H7 str. Sakai DNA, complete genome	511058	511064	AAAAAAA
NC_002695.2 Escherichia coli O157:H7 str. Sakai DNA, complete genome	512785	512790	TTTTTT
NC_002695.2 Escherichia coli O157:H7 str. Sakai DNA, complete genome	512829	512834	AAAAAA
NC_002695.2 Escherichia coli O157:H7 str. Sakai DNA, complete genome	519369	519374	AAAAAA
NC_002695.2 Escherichia coli O157:H7 str. Sakai DNA, complete genome	520209	520215	TTTTTTT
NC_002695.2 Escherichia coli O157:H7 str. Sakai DNA, complete genome	520981	520986	AAAAAA
NC_002695.2 Escherichia coli O157:H7 str. Sakai DNA, complete genome	521170	521175	TTTTTT
NC_002695.2 Escherichia coli O157:H7 str. Sakai DNA, complete genome	521295	521300	AAAAAA
NC_002695.2 Escherichia coli O157:H7 str. Sakai DNA, complete genome	521431	521436	AAAAAA
NC_002695.2 Escherichia coli O157:H7 str. Sakai DNA, complete genome	522544	522550	TTTTTTT
NC_002695.2 Escherichia coli O157:H7 str. Sakai DNA, complete genome	522702	522707	TTTTTT
NC_002695.2 Escherichia coli O157:H7 str. Sakai DNA, complete genome	523731	523736	AAAAAA
NC_002695.2 Escherichia coli O157:H7 str. Sakai DNA, complete genome	524787	524792	GGGGGG
NC_002695.2 Escherichia coli O157:H7 str. Sakai DNA, complete genome	525082	525088	AAAAAAA
NC_002695.2 Escherichia coli O157:H7 str. Sakai DNA, complete genome	525376	525382	AAAAAAA
NC_002695.2 Escherichia coli O157:H7 str. Sakai DNA, complete genome	525868	525873	AAAAAA
NC_002695.2 Escherichia coli O157:H7 str. Sakai DNA, complete genome	526489	526494	AAAAAA
NC_002695.2 Escherichia coli O157:H7 str. Sakai DNA, complete genome	527358	527364	TTTTTTT
NC_002695.2 Escherichia coli O157:H7 str. Sakai DNA, complete genome	527832	527837	TTTTTT
NC_002695.2 Escherichia coli O157:H7 str. Sakai DNA, complete genome	529720	529725	AAAAAA
NC_002695.2 Escherichia coli O157:H7 str. Sakai DNA, complete genome	529857	529863	AAAAAAA
NC_002695.2 Escherichia coli O157:H7 str. Sakai DNA, complete genome	530381	530386	TTTTTT
NC_002695.2 Escherichia coli O157:H7 str. Sakai DNA, complete genome	532044	532049	TTTTTT
NC_002695.2 Escherichia coli O157:H7 str. Sakai DNA, complete genome	533882	533888	AAAAAAA
NC_002695.2 Escherichia coli O157:H7 str. Sakai DNA, complete genome	534329	534335	TTTTTTT
NC_002695.2 Escherichia coli O157:H7 str. Sakai DNA, complete genome	534423	534429	AAAAAAA
NC_002695.2 Escherichia coli O157:H7 str. Sakai DNA, complete genome	534619	534624	AAAAAA
NC_002695.2 Escherichia coli O157:H7 str. Sakai DNA, complete genome	535628	535635	AAAAAAAA
NC_002695.2 Escherichia coli O157:H7 str. Sakai DNA, complete genome	536196	536201	TTTTTT
NC_002695.2 Escherichia coli O157:H7 str. Sakai DNA, complete genome	538801	538806	GGGGGG
NC_002695.2 Escherichia coli O157:H7 str. Sakai DNA, complete genome	540327	540332	AAAAAA
NC_002695.2 Escherichia coli O157:H7 str. Sakai DNA, complete genome	540360	540366	TTTTTTT
NC_002695.2 Escherichia coli O157:H7 str. Sakai DNA, complete genome	540868	540873	TTTTTT
NC_002695.2 Escherichia coli O157:H7 str. Sakai DNA, complete genome	540919	540924	AAAAAA
NC_002695.2 Escherichia coli O157:H7 str. Sakai DNA, complete genome	541177	541182	TTTTTT
NC_002695.2 Escherichia coli O157:H7 str. Sakai DNA, complete genome	541206	541211	TTTTTT
NC_002695.2 Escherichia coli O157:H7 str. Sakai DNA, complete genome	541865	541870	GGGGGG
NC_002695.2 Escherichia coli O157:H7 str. Sakai DNA, complete genome	542652	542657	AAAAAA
NC_002695.2 Escherichia coli O157:H7 str. Sakai DNA, complete genome	543570	543575	TTTTTT
NC_002695.2 Escherichia coli O157:H7 str. Sakai DNA, complete genome	544080	544085	TTTTTT
NC_002695.2 Escherichia coli O157:H7 str. Sakai DNA, complete genome	544918	544923	TTTTTT
NC_002695.2 Escherichia coli O157:H7 str. Sakai DNA, complete genome	545177	545183	AAAAAAA
NC_002695.2 Escherichia coli O157:H7 str. Sakai DNA, complete genome	545439	545444	TTTTTT
NC_002695.2 Escherichia coli O157:H7 str. Sakai DNA, complete genome	545743	545748	AAAAAA
NC_002695.2 Escherichia coli O157:H7 str. Sakai DNA, complete genome	546824	546829	AAAAAA
NC_002695.2 Escherichia coli O157:H7 str. Sakai DNA, complete genome	547185	547190	TTTTTT
NC_002695.2 Escherichia coli O157:H7 str. Sakai DNA, complete genome	547279	547284	AAAAAA
NC_002695.2 Escherichia coli O157:H7 str. Sakai DNA, complete genome	548940	548945	TTTTTT
NC_002695.2 Escherichia coli O157:H7 str. Sakai DNA, complete genome	550398	550403	CCCCCC
NC_002695.2 Escherichia coli O157:H7 str. Sakai DNA, complete genome	552388	552393	AAAAAA
NC_002695.2 Escherichia coli O157:H7 str. Sakai DNA, complete genome	552642	552647	TTTTTT
NC_002695.2 Escherichia coli O157:H7 str. Sakai DNA, complete genome	552900	552905	AAAAAA
NC_002695.2 Escherichia coli O157:H7 str. Sakai DNA, complete genome	553398	553403	AAAAAA
NC_002695.2 Escherichia coli O157:H7 str. Sakai DNA, complete genome	554369	554374	AAAAAA
NC_002695.2 Escherichia coli O157:H7 str. Sakai DNA, complete genome	555999	556004	TTTTTT
NC_002695.2 Escherichia coli O157:H7 str. Sakai DNA, complete genome	556213	556218	TTTTTT
NC_002695.2 Escherichia coli O157:H7 str. Sakai DNA, complete genome	558112	558117	TTTTTT
NC_002695.2 Escherichia coli O157:H7 str. Sakai DNA, complete genome	559271	559276	AAAAAA
NC_002695.2 Escherichia coli O157:H7 str. Sakai DNA, complete genome	559401	559406	AAAAAA
NC_002695.2 Escherichia coli O157:H7 str. Sakai DNA, complete genome	559479	559484	AAAAAA
NC_002695.2 Escherichia coli O157:H7 str. Sakai DNA, complete genome	559498	559503	AAAAAA
NC_002695.2 Escherichia coli O157:H7 str. Sakai DNA, complete genome	560027	560032	AAAAAA
NC_002695.2 Escherichia coli O157:H7 str. Sakai DNA, complete genome	560240	560245	AAAAAA
NC_002695.2 Escherichia coli O157:H7 str. Sakai DNA, complete genome	560704	560709	AAAAAA
NC_002695.2 Escherichia coli O157:H7 str. Sakai DNA, complete genome	563037	563042	AAAAAA
NC_002695.2 Escherichia coli O157:H7 str. Sakai DNA, complete genome	563699	563704	AAAAAA
NC_002695.2 Escherichia coli O157:H7 str. Sakai DNA, complete genome	564726	564731	AAAAAA
NC_002695.2 Escherichia coli O157:H7 str. Sakai DNA, complete genome	566959	566964	AAAAAA
NC_002695.2 Escherichia coli O157:H7 str. Sakai DNA, complete genome	568173	568178	AAAAAA
NC_002695.2 Escherichia coli O157:H7 str. Sakai DNA, complete genome	569166	569171	AAAAAA
NC_002695.2 Escherichia coli O157:H7 str. Sakai DNA, complete genome	570880	570885	AAAAAA
NC_002695.2 Escherichia coli O157:H7 str. Sakai DNA, complete genome	572544	572549	TTTTTT
NC_002695.2 Escherichia coli O157:H7 str. Sakai DNA, complete genome	572568	572573	CCCCCC
NC_002695.2 Escherichia coli O157:H7 str. Sakai DNA, complete genome	572652	572657	TTTTTT
NC_002695.2 Escherichia coli O157:H7 str. Sakai DNA, complete genome	572766	572771	TTTTTT
NC_002695.2 Escherichia coli O157:H7 str. Sakai DNA, complete genome	572842	572848	TTTTTTT
NC_002695.2 Escherichia coli O157:H7 str. Sakai DNA, complete genome	572895	572901	AAAAAAA
NC_002695.2 Escherichia coli O157:H7 str. Sakai DNA, complete genome	572931	572938	AAAAAAAA
NC_002695.2 Escherichia coli O157:H7 str. Sakai DNA, complete genome	573026	573032	AAAAAAA
NC_002695.2 Escherichia coli O157:H7 str. Sakai DNA, complete genome	573072	573078	TTTTTTT
NC_002695.2 Escherichia coli O157:H7 str. Sakai DNA, complete genome	574335	574340	AAAAAA
NC_002695.2 Escherichia coli O157:H7 str. Sakai DNA, complete genome	576067	576072	TTTTTT
NC_002695.2 Escherichia coli O157:H7 str. Sakai DNA, complete genome	577179	577184	AAAAAA
NC_002695.2 Escherichia coli O157:H7 str. Sakai DNA, complete genome	578208	578213	AAAAAA
NC_002695.2 Escherichia coli O157:H7 str. Sakai DNA, complete genome	578830	578835	CCCCCC
NC_002695.2 Escherichia coli O157:H7 str. Sakai DNA, complete genome	579644	579650	AAAAAAA
NC_002695.2 Escherichia coli O157:H7 str. Sakai DNA, complete genome	579939	579946	TTTTTTTT
NC_002695.2 Escherichia coli O157:H7 str. Sakai DNA, complete genome	580731	580736	AAAAAA
NC_002695.2 Escherichia coli O157:H7 str. Sakai DNA, complete genome	580771	580776	GGGGGG
NC_002695.2 Escherichia coli O157:H7 str. Sakai DNA, complete genome	580899	580904	AAAAAA
NC_002695.2 Escherichia coli O157:H7 str. Sakai DNA, complete genome	601829	601836	AAAAAAAA
NC_002695.2 Escherichia coli O157:H7 str. Sakai DNA, complete genome	605092	605098	AAAAAAA
NC_002695.2 Escherichia coli O157:H7 str. Sakai DNA, complete genome	606525	606530	TTTTTT
NC_002695.2 Escherichia coli O157:H7 str. Sakai DNA, complete genome	606871	606876	TTTTTT
NC_002695.2 Escherichia coli O157:H7 str. Sakai DNA, complete genome	607006	607011	TTTTTT
NC_002695.2 Escherichia coli O157:H7 str. Sakai DNA, complete genome	607482	607487	AAAAAA
NC_002695.2 Escherichia coli O157:H7 str. Sakai DNA, complete genome	607515	607520	AAAAAA
NC_002695.2 Escherichia coli O157:H7 str. Sakai DNA, complete genome	607963	607969	AAAAAAA
NC_002695.2 Escherichia coli O157:H7 str. Sakai DNA, complete genome	607989	607994	AAAAAA
NC_002695.2 Escherichia coli O157:H7 str. Sakai DNA, complete genome	616374	616379	AAAAAA
NC_002695.2 Escherichia coli O157:H7 str. Sakai DNA, complete genome	617005	617012	TTTTTTTT
NC_002695.2 Escherichia coli O157:H7 str. Sakai DNA, complete genome	617533	617538	GGGGGG
NC_002695.2 Escherichia coli O157:H7 str. Sakai DNA, complete genome	617872	617877	CCCCCC
NC_002695.2 Escherichia coli O157:H7 str. Sakai DNA, complete genome	618312	618317	AAAAAA
NC_002695.2 Escherichia coli O157:H7 str. Sakai DNA, complete genome	620762	620767	GGGGGG
NC_002695.2 Escherichia coli O157:H7 str. Sakai DNA, complete genome	621117	621122	AAAAAA
NC_002695.2 Escherichia coli O157:H7 str. Sakai DNA, complete genome	621417	621423	TTTTTTT
NC_002695.2 Escherichia coli O157:H7 str. Sakai DNA, complete genome	621474	621480	TTTTTTT
NC_002695.2 Escherichia coli O157:H7 str. Sakai DNA, complete genome	621507	621512	GGGGGG
NC_002695.2 Escherichia coli O157:H7 str. Sakai DNA, complete genome	621587	621593	AAAAAAA
NC_002695.2 Escherichia coli O157:H7 str. Sakai DNA, complete genome	621643	621649	TTTTTTT
NC_002695.2 Escherichia coli O157:H7 str. Sakai DNA, complete genome	622789	622794	TTTTTT
NC_002695.2 Escherichia coli O157:H7 str. Sakai DNA, complete genome	624094	624099	AAAAAA
NC_002695.2 Escherichia coli O157:H7 str. Sakai DNA, complete genome	624666	624671	AAAAAA
NC_002695.2 Escherichia coli O157:H7 str. Sakai DNA, complete genome	625122	625127	TTTTTT
NC_002695.2 Escherichia coli O157:H7 str. Sakai DNA, complete genome	625708	625713	AAAAAA
NC_002695.2 Escherichia coli O157:H7 str. Sakai DNA, complete genome	626451	626457	TTTTTTT
NC_002695.2 Escherichia coli O157:H7 str. Sakai DNA, complete genome	629105	629110	TTTTTT
NC_002695.2 Escherichia coli O157:H7 str. Sakai DNA, complete genome	630086	630091	AAAAAA
NC_002695.2 Escherichia coli O157:H7 str. Sakai DNA, complete genome	630111	630116	AAAAAA
NC_002695.2 Escherichia coli O157:H7 str. Sakai DNA, complete genome	630168	630173	TTTTTT
NC_002695.2 Escherichia coli O157:H7 str. Sakai DNA, complete genome	630381	630386	TTTTTT
NC_002695.2 Escherichia coli O157:H7 str. Sakai DNA, complete genome	633135	633140	TTTTTT
NC_002695.2 Escherichia coli O157:H7 str. Sakai DNA, complete genome	633295	633300	GGGGGG
NC_002695.2 Escherichia coli O157:H7 str. Sakai DNA, complete genome	633867	633872	TTTTTT
NC_002695.2 Escherichia coli O157:H7 str. Sakai DNA, complete genome	635701	635707	AAAAAAA
NC_002695.2 Escherichia coli O157:H7 str. Sakai DNA, complete genome	635884	635889	TTTTTT
NC_002695.2 Escherichia coli O157:H7 str. Sakai DNA, complete genome	636446	636451	TTTTTT
NC_002695.2 Escherichia coli O157:H7 str. Sakai DNA, complete genome	637666	637673	TTTTTTTT
NC_002695.2 Escherichia coli O157:H7 str. Sakai DNA, complete genome	638957	638963	AAAAAAA
NC_002695.2 Escherichia coli O157:H7 str. Sakai DNA, complete genome	639030	639035	AAAAAA
NC_002695.2 Escherichia coli O157:H7 str. Sakai DNA, complete genome	639207	639212	AAAAAA
NC_002695.2 Escherichia coli O157:H7 str. Sakai DNA, complete genome	640821	640826	AAAAAA
NC_002695.2 Escherichia coli O157:H7 str. Sakai DNA, complete genome	642715	642720	TTTTTT
NC_002695.2 Escherichia coli O157:H7 str. Sakai DNA, complete genome	645667	645672	TTTTTT
NC_002695.2 Escherichia coli O157:H7 str. Sakai DNA, complete genome	646317	646322	AAAAAA
NC_002695.2 Escherichia coli O157:H7 str. Sakai DNA, complete genome	650528	650533	TTTTTT
NC_002695.2 Escherichia coli O157:H7 str. Sakai DNA, complete genome	652740	652746	TTTTTTT
NC_002695.2 Escherichia coli O157:H7 str. Sakai DNA, complete genome	653296	653301	TTTTTT
NC_002695.2 Escherichia coli O157:H7 str. Sakai DNA, complete genome	654425	654431	AAAAAAA
NC_002695.2 Escherichia coli O157:H7 str. Sakai DNA, complete genome	656219	656224	TTTTTT
NC_002695.2 Escherichia coli O157:H7 str. Sakai DNA, complete genome	656560	656565	AAAAAA
NC_002695.2 Escherichia coli O157:H7 str. Sakai DNA, complete genome	656864	656870	TTTTTTT
NC_002695.2 Escherichia coli O157:H7 str. Sakai DNA, complete genome	657513	657518	TTTTTT
NC_002695.2 Escherichia coli O157:H7 str. Sakai DNA, complete genome	658589	658594	AAAAAA
NC_002695.2 Escherichia coli O157:H7 str. Sakai DNA, complete genome	658840	658845	AAAAAA
NC_002695.2 Escherichia coli O157:H7 str. Sakai DNA, complete genome	664232	664238	AAAAAAA
NC_002695.2 Escherichia coli O157:H7 str. Sakai DNA, complete genome	664388	664393	TTTTTT
NC_002695.2 Escherichia coli O157:H7 str. Sakai DNA, complete genome	665566	665571	AAAAAA
NC_002695.2 Escherichia coli O157:H7 str. Sakai DNA, complete genome	665724	665729	TTTTTT
NC_002695.2 Escherichia coli O157:H7 str. Sakai DNA, complete genome	665853	665858	AAAAAA
NC_002695.2 Escherichia coli O157:H7 str. Sakai DNA, complete genome	667724	667730	TTTTTTT
NC_002695.2 Escherichia coli O157:H7 str. Sakai DNA, complete genome	668021	668028	TTTTTTTT
NC_002695.2 Escherichia coli O157:H7 str. Sakai DNA, complete genome	668382	668387	TTTTTT
NC_002695.2 Escherichia coli O157:H7 str. Sakai DNA, complete genome	672245	672250	TTTTTT
NC_002695.2 Escherichia coli O157:H7 str. Sakai DNA, complete genome	672780	672785	AAAAAA
NC_002695.2 Escherichia coli O157:H7 str. Sakai DNA, complete genome	672821	672827	GGGGGGG
NC_002695.2 Escherichia coli O157:H7 str. Sakai DNA, complete genome	672834	672839	TTTTTT
NC_002695.2 Escherichia coli O157:H7 str. Sakai DNA, complete genome	673822	673827	TTTTTT
NC_002695.2 Escherichia coli O157:H7 str. Sakai DNA, complete genome	675483	675488	AAAAAA
NC_002695.2 Escherichia coli O157:H7 str. Sakai DNA, complete genome	675552	675558	AAAAAAA
NC_002695.2 Escherichia coli O157:H7 str. Sakai DNA, complete genome	675715	675720	AAAAAA
NC_002695.2 Escherichia coli O157:H7 str. Sakai DNA, complete genome	676386	676391	AAAAAA
NC_002695.2 Escherichia coli O157:H7 str. Sakai DNA, complete genome	677375	677380	AAAAAA
NC_002695.2 Escherichia coli O157:H7 str. Sakai DNA, complete genome	677619	677624	AAAAAA
NC_002695.2 Escherichia coli O157:H7 str. Sakai DNA, complete genome	678429	678434	TTTTTT
NC_002695.2 Escherichia coli O157:H7 str. Sakai DNA, complete genome	678665	678670	TTTTTT
NC_002695.2 Escherichia coli O157:H7 str. Sakai DNA, complete genome	679670	679675	AAAAAA
NC_002695.2 Escherichia coli O157:H7 str. Sakai DNA, complete genome	679820	679826	AAAAAAA
NC_002695.2 Escherichia coli O157:H7 str. Sakai DNA, complete genome	680018	680024	AAAAAAA
NC_002695.2 Escherichia coli O157:H7 str. Sakai DNA, complete genome	680112	680117	AAAAAA
NC_002695.2 Escherichia coli O157:H7 str. Sakai DNA, complete genome	680619	680624	AAAAAA
NC_002695.2 Escherichia coli O157:H7 str. Sakai DNA, complete genome	681288	681293	TTTTTT
NC_002695.2 Escherichia coli O157:H7 str. Sakai DNA, complete genome	683012	683017	AAAAAA
NC_002695.2 Escherichia coli O157:H7 str. Sakai DNA, complete genome	684465	684470	AAAAAA
NC_002695.2 Escherichia coli O157:H7 str. Sakai DNA, complete genome	685204	685209	AAAAAA
NC_002695.2 Escherichia coli O157:H7 str. Sakai DNA, complete genome	685924	685930	TTTTTTT
NC_002695.2 Escherichia coli O157:H7 str. Sakai DNA, complete genome	687879	687884	TTTTTT
NC_002695.2 Escherichia coli O157:H7 str. Sakai DNA, complete genome	688052	688057	TTTTTT
NC_002695.2 Escherichia coli O157:H7 str. Sakai DNA, complete genome	688949	688954	TTTTTT
NC_002695.2 Escherichia coli O157:H7 str. Sakai DNA, complete genome	689342	689347	AAAAAA
NC_002695.2 Escherichia coli O157:H7 str. Sakai DNA, complete genome	689982	689988	TTTTTTT
NC_002695.2 Escherichia coli O157:H7 str. Sakai DNA, complete genome	690086	690091	AAAAAA
NC_002695.2 Escherichia coli O157:H7 str. Sakai DNA, complete genome	691145	691150	TTTTTT
NC_002695.2 Escherichia coli O157:H7 str. Sakai DNA, complete genome	691400	691405	AAAAAA
NC_002695.2 Escherichia coli O157:H7 str. Sakai DNA, complete genome	693642	693647	TTTTTT
NC_002695.2 Escherichia coli O157:H7 str. Sakai DNA, complete genome	694695	694700	TTTTTT
NC_002695.2 Escherichia coli O157:H7 str. Sakai DNA, complete genome	696765	696771	AAAAAAA
NC_002695.2 Escherichia coli O157:H7 str. Sakai DNA, complete genome	697735	697740	AAAAAA
NC_002695.2 Escherichia coli O157:H7 str. Sakai DNA, complete genome	699655	699660	AAAAAA
NC_002695.2 Escherichia coli O157:H7 str. Sakai DNA, complete genome	700028	700034	AAAAAAA
NC_002695.2 Escherichia coli O157:H7 str. Sakai DNA, complete genome	700359	700364	AAAAAA
NC_002695.2 Escherichia coli O157:H7 str. Sakai DNA, complete genome	700394	700399	AAAAAA
NC_002695.2 Escherichia coli O157:H7 str. Sakai DNA, complete genome	700904	700909	AAAAAA
NC_002695.2 Escherichia coli O157:H7 str. Sakai DNA, complete genome	701856	701861	TTTTTT
NC_002695.2 Escherichia coli O157:H7 str. Sakai DNA, complete genome	704200	704205	AAAAAA
NC_002695.2 Escherichia coli O157:H7 str. Sakai DNA, complete genome	704319	704324	TTTTTT
NC_002695.2 Escherichia coli O157:H7 str. Sakai DNA, complete genome	708955	708960	AAAAAA
NC_002695.2 Escherichia coli O157:H7 str. Sakai DNA, complete genome	709107	709112	AAAAAA
NC_002695.2 Escherichia coli O157:H7 str. Sakai DNA, complete genome	713482	713487	GGGGGG
NC_002695.2 Escherichia coli O157:H7 str. Sakai DNA, complete genome	714862	714867	AAAAAA
NC_002695.2 Escherichia coli O157:H7 str. Sakai DNA, complete genome	716613	716618	TTTTTT
NC_002695.2 Escherichia coli O157:H7 str. Sakai DNA, complete genome	716625	716632	TTTTTTTT
NC_002695.2 Escherichia coli O157:H7 str. Sakai DNA, complete genome	717026	717031	TTTTTT
NC_002695.2 Escherichia coli O157:H7 str. Sakai DNA, complete genome	717082	717087	TTTTTT
NC_002695.2 Escherichia coli O157:H7 str. Sakai DNA, complete genome	717868	717874	TTTTTTT
NC_002695.2 Escherichia coli O157:H7 str. Sakai DNA, complete genome	719139	719144	TTTTTT
NC_002695.2 Escherichia coli O157:H7 str. Sakai DNA, complete genome	719169	719176	TTTTTTTT
NC_002695.2 Escherichia coli O157:H7 str. Sakai DNA, complete genome	719243	719248	TTTTTT
NC_002695.2 Escherichia coli O157:H7 str. Sakai DNA, complete genome	719709	719714	TTTTTT
NC_002695.2 Escherichia coli O157:H7 str. Sakai DNA, complete genome	720034	720039	TTTTTT
NC_002695.2 Escherichia coli O157:H7 str. Sakai DNA, complete genome	722728	722733	TTTTTT
NC_002695.2 Escherichia coli O157:H7 str. Sakai DNA, complete genome	723417	723422	TTTTTT
NC_002695.2 Escherichia coli O157:H7 str. Sakai DNA, complete genome	723661	723666	AAAAAA
NC_002695.2 Escherichia coli O157:H7 str. Sakai DNA, complete genome	723721	723726	TTTTTT
NC_002695.2 Escherichia coli O157:H7 str. Sakai DNA, complete genome	723791	723796	AAAAAA
NC_002695.2 Escherichia coli O157:H7 str. Sakai DNA, complete genome	723979	723984	AAAAAA
NC_002695.2 Escherichia coli O157:H7 str. Sakai DNA, complete genome	724666	724671	GGGGGG
NC_002695.2 Escherichia coli O157:H7 str. Sakai DNA, complete genome	726407	726412	AAAAAA
NC_002695.2 Escherichia coli O157:H7 str. Sakai DNA, complete genome	728158	728163	CCCCCC
NC_002695.2 Escherichia coli O157:H7 str. Sakai DNA, complete genome	728513	728518	AAAAAA
NC_002695.2 Escherichia coli O157:H7 str. Sakai DNA, complete genome	732795	732800	TTTTTT
NC_002695.2 Escherichia coli O157:H7 str. Sakai DNA, complete genome	733160	733166	TTTTTTT
NC_002695.2 Escherichia coli O157:H7 str. Sakai DNA, complete genome	733309	733314	GGGGGG
NC_002695.2 Escherichia coli O157:H7 str. Sakai DNA, complete genome	733405	733410	TTTTTT
NC_002695.2 Escherichia coli O157:H7 str. Sakai DNA, complete genome	733431	733436	TTTTTT
NC_002695.2 Escherichia coli O157:H7 str. Sakai DNA, complete genome	736650	736655	TTTTTT
NC_002695.2 Escherichia coli O157:H7 str. Sakai DNA, complete genome	737360	737365	AAAAAA
NC_002695.2 Escherichia coli O157:H7 str. Sakai DNA, complete genome	737382	737387	AAAAAA
NC_002695.2 Escherichia coli O157:H7 str. Sakai DNA, complete genome	737587	737592	AAAAAA
NC_002695.2 Escherichia coli O157:H7 str. Sakai DNA, complete genome	737663	737668	AAAAAA
NC_002695.2 Escherichia coli O157:H7 str. Sakai DNA, complete genome	737676	737681	TTTTTT
NC_002695.2 Escherichia coli O157:H7 str. Sakai DNA, complete genome	738109	738114	AAAAAA
NC_002695.2 Escherichia coli O157:H7 str. Sakai DNA, complete genome	738898	738905	TTTTTTTT
NC_002695.2 Escherichia coli O157:H7 str. Sakai DNA, complete genome	740178	740184	TTTTTTT
NC_002695.2 Escherichia coli O157:H7 str. Sakai DNA, complete genome	740454	740459	AAAAAA
NC_002695.2 Escherichia coli O157:H7 str. Sakai DNA, complete genome	740548	740553	AAAAAA
NC_002695.2 Escherichia coli O157:H7 str. Sakai DNA, complete genome	740572	740577	TTTTTT
NC_002695.2 Escherichia coli O157:H7 str. Sakai DNA, complete genome	741096	741101	TTTTTT
NC_002695.2 Escherichia coli O157:H7 str. Sakai DNA, complete genome	742774	742780	AAAAAAA
NC_002695.2 Escherichia coli O157:H7 str. Sakai DNA, complete genome	744053	744058	TTTTTT
NC_002695.2 Escherichia coli O157:H7 str. Sakai DNA, complete genome	744473	744478	TTTTTT
NC_002695.2 Escherichia coli O157:H7 str. Sakai DNA, complete genome	745306	745311	AAAAAA
NC_002695.2 Escherichia coli O157:H7 str. Sakai DNA, complete genome	745352	745358	AAAAAAA
NC_002695.2 Escherichia coli O157:H7 str. Sakai DNA, complete genome	747648	747654	TTTTTTT
NC_002695.2 Escherichia coli O157:H7 str. Sakai DNA, complete genome	748254	748259	TTTTTT
NC_002695.2 Escherichia coli O157:H7 str. Sakai DNA, complete genome	748461	748466	TTTTTT
NC_002695.2 Escherichia coli O157:H7 str. Sakai DNA, complete genome	750640	750646	AAAAAAA
NC_002695.2 Escherichia coli O157:H7 str. Sakai DNA, complete genome	751015	751020	AAAAAA
NC_002695.2 Escherichia coli O157:H7 str. Sakai DNA, complete genome	755240	755245	TTTTTT
NC_002695.2 Escherichia coli O157:H7 str. Sakai DNA, complete genome	755705	755710	TTTTTT
NC_002695.2 Escherichia coli O157:H7 str. Sakai DNA, complete genome	757635	757640	TTTTTT
NC_002695.2 Escherichia coli O157:H7 str. Sakai DNA, complete genome	757960	757965	TTTTTT
NC_002695.2 Escherichia coli O157:H7 str. Sakai DNA, complete genome	758088	758093	AAAAAA
NC_002695.2 Escherichia coli O157:H7 str. Sakai DNA, complete genome	758183	758188	TTTTTT
NC_002695.2 Escherichia coli O157:H7 str. Sakai DNA, complete genome	758440	758445	TTTTTT
NC_002695.2 Escherichia coli O157:H7 str. Sakai DNA, complete genome	760756	760761	TTTTTT
NC_002695.2 Escherichia coli O157:H7 str. Sakai DNA, complete genome	760828	760833	AAAAAA
NC_002695.2 Escherichia coli O157:H7 str. Sakai DNA, complete genome	762912	762918	AAAAAAA
NC_002695.2 Escherichia coli O157:H7 str. Sakai DNA, complete genome	763032	763037	TTTTTT
NC_002695.2 Escherichia coli O157:H7 str. Sakai DNA, complete genome	765641	765646	TTTTTT
NC_002695.2 Escherichia coli O157:H7 str. Sakai DNA, complete genome	766539	766544	TTTTTT
NC_002695.2 Escherichia coli O157:H7 str. Sakai DNA, complete genome	767013	767018	TTTTTT
NC_002695.2 Escherichia coli O157:H7 str. Sakai DNA, complete genome	767297	767302	CCCCCC
NC_002695.2 Escherichia coli O157:H7 str. Sakai DNA, complete genome	767999	768005	AAAAAAA
NC_002695.2 Escherichia coli O157:H7 str. Sakai DNA, complete genome	768044	768049	AAAAAA
NC_002695.2 Escherichia coli O157:H7 str. Sakai DNA, complete genome	768580	768585	TTTTTT
NC_002695.2 Escherichia coli O157:H7 str. Sakai DNA, complete genome	773657	773662	AAAAAA
NC_002695.2 Escherichia coli O157:H7 str. Sakai DNA, complete genome	775106	775111	TTTTTT
NC_002695.2 Escherichia coli O157:H7 str. Sakai DNA, complete genome	776582	776587	TTTTTT
NC_002695.2 Escherichia coli O157:H7 str. Sakai DNA, complete genome	777211	777218	AAAAAAAA
NC_002695.2 Escherichia coli O157:H7 str. Sakai DNA, complete genome	777301	777308	TTTTTTTT
NC_002695.2 Escherichia coli O157:H7 str. Sakai DNA, complete genome	777459	777464	TTTTTT
NC_002695.2 Escherichia coli O157:H7 str. Sakai DNA, complete genome	779137	779142	TTTTTT
NC_002695.2 Escherichia coli O157:H7 str. Sakai DNA, complete genome	779391	779397	AAAAAAA
NC_002695.2 Escherichia coli O157:H7 str. Sakai DNA, complete genome	779437	779442	AAAAAA
NC_002695.2 Escherichia coli O157:H7 str. Sakai DNA, complete genome	779444	779449	AAAAAA
NC_002695.2 Escherichia coli O157:H7 str. Sakai DNA, complete genome	780607	780612	TTTTTT
NC_002695.2 Escherichia coli O157:H7 str. Sakai DNA, complete genome	782356	782361	TTTTTT
NC_002695.2 Escherichia coli O157:H7 str. Sakai DNA, complete genome	782792	782797	AAAAAA
NC_002695.2 Escherichia coli O157:H7 str. Sakai DNA, complete genome	783263	783268	TTTTTT
NC_002695.2 Escherichia coli O157:H7 str. Sakai DNA, complete genome	783730	783735	TTTTTT
NC_002695.2 Escherichia coli O157:H7 str. Sakai DNA, complete genome	783982	783987	TTTTTT
NC_002695.2 Escherichia coli O157:H7 str. Sakai DNA, complete genome	785988	785996	TTTTTTTTT
NC_002695.2 Escherichia coli O157:H7 str. Sakai DNA, complete genome	788000	788005	TTTTTT
NC_002695.2 Escherichia coli O157:H7 str. Sakai DNA, complete genome	788290	788295	TTTTTT
NC_002695.2 Escherichia coli O157:H7 str. Sakai DNA, complete genome	788304	788310	TTTTTTT
NC_002695.2 Escherichia coli O157:H7 str. Sakai DNA, complete genome	789818	789823	AAAAAA
NC_002695.2 Escherichia coli O157:H7 str. Sakai DNA, complete genome	789948	789953	AAAAAA
NC_002695.2 Escherichia coli O157:H7 str. Sakai DNA, complete genome	790182	790187	AAAAAA
NC_002695.2 Escherichia coli O157:H7 str. Sakai DNA, complete genome	792838	792844	TTTTTTT
NC_002695.2 Escherichia coli O157:H7 str. Sakai DNA, complete genome	793976	793981	AAAAAA
NC_002695.2 Escherichia coli O157:H7 str. Sakai DNA, complete genome	795263	795268	TTTTTT
NC_002695.2 Escherichia coli O157:H7 str. Sakai DNA, complete genome	795276	795281	TTTTTT
NC_002695.2 Escherichia coli O157:H7 str. Sakai DNA, complete genome	795454	795459	GGGGGG
NC_002695.2 Escherichia coli O157:H7 str. Sakai DNA, complete genome	797688	797693	TTTTTT
NC_002695.2 Escherichia coli O157:H7 str. Sakai DNA, complete genome	798864	798870	AAAAAAA
NC_002695.2 Escherichia coli O157:H7 str. Sakai DNA, complete genome	799291	799296	AAAAAA
NC_002695.2 Escherichia coli O157:H7 str. Sakai DNA, complete genome	801454	801459	AAAAAA
NC_002695.2 Escherichia coli O157:H7 str. Sakai DNA, complete genome	801949	801954	TTTTTT
NC_002695.2 Escherichia coli O157:H7 str. Sakai DNA, complete genome	802214	802219	AAAAAA
NC_002695.2 Escherichia coli O157:H7 str. Sakai DNA, complete genome	802331	802336	AAAAAA
NC_002695.2 Escherichia coli O157:H7 str. Sakai DNA, complete genome	804471	804476	TTTTTT
NC_002695.2 Escherichia coli O157:H7 str. Sakai DNA, complete genome	805158	805164	TTTTTTT
NC_002695.2 Escherichia coli O157:H7 str. Sakai DNA, complete genome	805393	805398	TTTTTT
NC_002695.2 Escherichia coli O157:H7 str. Sakai DNA, complete genome	805936	805942	TTTTTTT
NC_002695.2 Escherichia coli O157:H7 str. Sakai DNA, complete genome	806594	806599	AAAAAA
NC_002695.2 Escherichia coli O157:H7 str. Sakai DNA, complete genome	806924	806929	AAAAAA
NC_002695.2 Escherichia coli O157:H7 str. Sakai DNA, complete genome	807335	807341	AAAAAAA
NC_002695.2 Escherichia coli O157:H7 str. Sakai DNA, complete genome	807817	807822	TTTTTT
NC_002695.2 Escherichia coli O157:H7 str. Sakai DNA, complete genome	811687	811692	GGGGGG
NC_002695.2 Escherichia coli O157:H7 str. Sakai DNA, complete genome	812221	812229	TTTTTTTTT
NC_002695.2 Escherichia coli O157:H7 str. Sakai DNA, complete genome	812322	812327	TTTTTT
NC_002695.2 Escherichia coli O157:H7 str. Sakai DNA, complete genome	812538	812543	AAAAAA
NC_002695.2 Escherichia coli O157:H7 str. Sakai DNA, complete genome	812595	812601	AAAAAAA
NC_002695.2 Escherichia coli O157:H7 str. Sakai DNA, complete genome	813206	813211	AAAAAA
NC_002695.2 Escherichia coli O157:H7 str. Sakai DNA, complete genome	813330	813335	AAAAAA
NC_002695.2 Escherichia coli O157:H7 str. Sakai DNA, complete genome	813362	813367	AAAAAA
NC_002695.2 Escherichia coli O157:H7 str. Sakai DNA, complete genome	813372	813377	TTTTTT
NC_002695.2 Escherichia coli O157:H7 str. Sakai DNA, complete genome	813783	813788	GGGGGG
NC_002695.2 Escherichia coli O157:H7 str. Sakai DNA, complete genome	813828	813834	AAAAAAA
NC_002695.2 Escherichia coli O157:H7 str. Sakai DNA, complete genome	814177	814182	AAAAAA
NC_002695.2 Escherichia coli O157:H7 str. Sakai DNA, complete genome	814309	814314	TTTTTT
NC_002695.2 Escherichia coli O157:H7 str. Sakai DNA, complete genome	814372	814377	AAAAAA
NC_002695.2 Escherichia coli O157:H7 str. Sakai DNA, complete genome	814530	814535	TTTTTT
NC_002695.2 Escherichia coli O157:H7 str. Sakai DNA, complete genome	816452	816457	TTTTTT
NC_002695.2 Escherichia coli O157:H7 str. Sakai DNA, complete genome	818601	818606	TTTTTT
NC_002695.2 Escherichia coli O157:H7 str. Sakai DNA, complete genome	819580	819585	AAAAAA
NC_002695.2 Escherichia coli O157:H7 str. Sakai DNA, complete genome	821955	821960	AAAAAA
NC_002695.2 Escherichia coli O157:H7 str. Sakai DNA, complete genome	822566	822571	AAAAAA
NC_002695.2 Escherichia coli O157:H7 str. Sakai DNA, complete genome	824480	824485	AAAAAA
NC_002695.2 Escherichia coli O157:H7 str. Sakai DNA, complete genome	824657	824662	TTTTTT
NC_002695.2 Escherichia coli O157:H7 str. Sakai DNA, complete genome	825580	825586	AAAAAAA
NC_002695.2 Escherichia coli O157:H7 str. Sakai DNA, complete genome	825626	825631	TTTTTT
NC_002695.2 Escherichia coli O157:H7 str. Sakai DNA, complete genome	825919	825925	TTTTTTT
NC_002695.2 Escherichia coli O157:H7 str. Sakai DNA, complete genome	827941	827946	TTTTTT
NC_002695.2 Escherichia coli O157:H7 str. Sakai DNA, complete genome	828520	828525	TTTTTT
NC_002695.2 Escherichia coli O157:H7 str. Sakai DNA, complete genome	829229	829234	TTTTTT
NC_002695.2 Escherichia coli O157:H7 str. Sakai DNA, complete genome	829426	829431	TTTTTT
NC_002695.2 Escherichia coli O157:H7 str. Sakai DNA, complete genome	829502	829507	TTTTTT
NC_002695.2 Escherichia coli O157:H7 str. Sakai DNA, complete genome	829742	829748	TTTTTTT
NC_002695.2 Escherichia coli O157:H7 str. Sakai DNA, complete genome	829772	829779	AAAAAAAA
NC_002695.2 Escherichia coli O157:H7 str. Sakai DNA, complete genome	831838	831843	AAAAAA
NC_002695.2 Escherichia coli O157:H7 str. Sakai DNA, complete genome	832310	832315	TTTTTT
NC_002695.2 Escherichia coli O157:H7 str. Sakai DNA, complete genome	835328	835333	AAAAAA
NC_002695.2 Escherichia coli O157:H7 str. Sakai DNA, complete genome	835949	835954	AAAAAA
NC_002695.2 Escherichia coli O157:H7 str. Sakai DNA, complete genome	836168	836173	AAAAAA
NC_002695.2 Escherichia coli O157:H7 str. Sakai DNA, complete genome	836783	836788	AAAAAA
NC_002695.2 Escherichia coli O157:H7 str. Sakai DNA, complete genome	838240	838245	AAAAAA
NC_002695.2 Escherichia coli O157:H7 str. Sakai DNA, complete genome	841608	841613	TTTTTT
NC_002695.2 Escherichia coli O157:H7 str. Sakai DNA, complete genome	842349	842354	AAAAAA
NC_002695.2 Escherichia coli O157:H7 str. Sakai DNA, complete genome	843627	843632	TTTTTT
NC_002695.2 Escherichia coli O157:H7 str. Sakai DNA, complete genome	844742	844747	TTTTTT
NC_002695.2 Escherichia coli O157:H7 str. Sakai DNA, complete genome	845206	845211	AAAAAA
NC_002695.2 Escherichia coli O157:H7 str. Sakai DNA, complete genome	846532	846537	AAAAAA
NC_002695.2 Escherichia coli O157:H7 str. Sakai DNA, complete genome	846772	846777	TTTTTT
NC_002695.2 Escherichia coli O157:H7 str. Sakai DNA, complete genome	849763	849769	AAAAAAA
NC_002695.2 Escherichia coli O157:H7 str. Sakai DNA, complete genome	849789	849794	TTTTTT
NC_002695.2 Escherichia coli O157:H7 str. Sakai DNA, complete genome	850972	850977	TTTTTT
NC_002695.2 Escherichia coli O157:H7 str. Sakai DNA, complete genome	851611	851616	TTTTTT
NC_002695.2 Escherichia coli O157:H7 str. Sakai DNA, complete genome	853608	853613	AAAAAA
NC_002695.2 Escherichia coli O157:H7 str. Sakai DNA, complete genome	853818	853823	AAAAAA
NC_002695.2 Escherichia coli O157:H7 str. Sakai DNA, complete genome	853870	853875	AAAAAA
NC_002695.2 Escherichia coli O157:H7 str. Sakai DNA, complete genome	854800	854807	TTTTTTTT
NC_002695.2 Escherichia coli O157:H7 str. Sakai DNA, complete genome	855497	855502	TTTTTT
NC_002695.2 Escherichia coli O157:H7 str. Sakai DNA, complete genome	855641	855647	AAAAAAA
NC_002695.2 Escherichia coli O157:H7 str. Sakai DNA, complete genome	855826	855831	TTTTTT
NC_002695.2 Escherichia coli O157:H7 str. Sakai DNA, complete genome	857219	857224	AAAAAA
NC_002695.2 Escherichia coli O157:H7 str. Sakai DNA, complete genome	859048	859053	TTTTTT
NC_002695.2 Escherichia coli O157:H7 str. Sakai DNA, complete genome	859125	859130	AAAAAA
NC_002695.2 Escherichia coli O157:H7 str. Sakai DNA, complete genome	861353	861358	AAAAAA
NC_002695.2 Escherichia coli O157:H7 str. Sakai DNA, complete genome	861398	861403	AAAAAA
NC_002695.2 Escherichia coli O157:H7 str. Sakai DNA, complete genome	861506	861511	AAAAAA
NC_002695.2 Escherichia coli O157:H7 str. Sakai DNA, complete genome	861584	861589	AAAAAA
NC_002695.2 Escherichia coli O157:H7 str. Sakai DNA, complete genome	861697	861702	GGGGGG
NC_002695.2 Escherichia coli O157:H7 str. Sakai DNA, complete genome	864606	864611	AAAAAA
NC_002695.2 Escherichia coli O157:H7 str. Sakai DNA, complete genome	865132	865137	GGGGGG
NC_002695.2 Escherichia coli O157:H7 str. Sakai DNA, complete genome	865337	865342	GGGGGG
NC_002695.2 Escherichia coli O157:H7 str. Sakai DNA, complete genome	865677	865682	AAAAAA
NC_002695.2 Escherichia coli O157:H7 str. Sakai DNA, complete genome	865698	865703	TTTTTT
NC_002695.2 Escherichia coli O157:H7 str. Sakai DNA, complete genome	865991	865996	CCCCCC
NC_002695.2 Escherichia coli O157:H7 str. Sakai DNA, complete genome	866251	866256	AAAAAA
NC_002695.2 Escherichia coli O157:H7 str. Sakai DNA, complete genome	866461	866466	AAAAAA
NC_002695.2 Escherichia coli O157:H7 str. Sakai DNA, complete genome	866506	866512	AAAAAAA
NC_002695.2 Escherichia coli O157:H7 str. Sakai DNA, complete genome	867036	867042	TTTTTTT
NC_002695.2 Escherichia coli O157:H7 str. Sakai DNA, complete genome	870664	870669	AAAAAA
NC_002695.2 Escherichia coli O157:H7 str. Sakai DNA, complete genome	873834	873839	TTTTTT
NC_002695.2 Escherichia coli O157:H7 str. Sakai DNA, complete genome	876036	876041	TTTTTT
NC_002695.2 Escherichia coli O157:H7 str. Sakai DNA, complete genome	876100	876106	AAAAAAA
NC_002695.2 Escherichia coli O157:H7 str. Sakai DNA, complete genome	877281	877286	GGGGGG
NC_002695.2 Escherichia coli O157:H7 str. Sakai DNA, complete genome	878767	878772	AAAAAA
NC_002695.2 Escherichia coli O157:H7 str. Sakai DNA, complete genome	878861	878866	TTTTTT
NC_002695.2 Escherichia coli O157:H7 str. Sakai DNA, complete genome	879107	879112	AAAAAA
NC_002695.2 Escherichia coli O157:H7 str. Sakai DNA, complete genome	879239	879244	AAAAAA
NC_002695.2 Escherichia coli O157:H7 str. Sakai DNA, complete genome	879608	879613	AAAAAA
NC_002695.2 Escherichia coli O157:H7 str. Sakai DNA, complete genome	879826	879831	TTTTTT
NC_002695.2 Escherichia coli O157:H7 str. Sakai DNA, complete genome	883589	883594	AAAAAA
NC_002695.2 Escherichia coli O157:H7 str. Sakai DNA, complete genome	884127	884132	AAAAAA
NC_002695.2 Escherichia coli O157:H7 str. Sakai DNA, complete genome	884331	884336	TTTTTT
NC_002695.2 Escherichia coli O157:H7 str. Sakai DNA, complete genome	884533	884538	AAAAAA
NC_002695.2 Escherichia coli O157:H7 str. Sakai DNA, complete genome	884636	884642	AAAAAAA
NC_002695.2 Escherichia coli O157:H7 str. Sakai DNA, complete genome	886266	886271	AAAAAA
NC_002695.2 Escherichia coli O157:H7 str. Sakai DNA, complete genome	886572	886577	AAAAAA
NC_002695.2 Escherichia coli O157:H7 str. Sakai DNA, complete genome	887458	887463	AAAAAA
NC_002695.2 Escherichia coli O157:H7 str. Sakai DNA, complete genome	887472	887478	AAAAAAA
NC_002695.2 Escherichia coli O157:H7 str. Sakai DNA, complete genome	888580	888585	AAAAAA
NC_002695.2 Escherichia coli O157:H7 str. Sakai DNA, complete genome	891111	891116	TTTTTT
NC_002695.2 Escherichia coli O157:H7 str. Sakai DNA, complete genome	891135	891140	AAAAAA
NC_002695.2 Escherichia coli O157:H7 str. Sakai DNA, complete genome	892012	892017	TTTTTT
NC_002695.2 Escherichia coli O157:H7 str. Sakai DNA, complete genome	892759	892764	TTTTTT
NC_002695.2 Escherichia coli O157:H7 str. Sakai DNA, complete genome	892868	892873	AAAAAA
NC_002695.2 Escherichia coli O157:H7 str. Sakai DNA, complete genome	892927	892932	AAAAAA
NC_002695.2 Escherichia coli O157:H7 str. Sakai DNA, complete genome	892984	892989	AAAAAA
NC_002695.2 Escherichia coli O157:H7 str. Sakai DNA, complete genome	893245	893250	TTTTTT
NC_002695.2 Escherichia coli O157:H7 str. Sakai DNA, complete genome	893280	893285	TTTTTT
NC_002695.2 Escherichia coli O157:H7 str. Sakai DNA, complete genome	893999	894004	AAAAAA
NC_002695.2 Escherichia coli O157:H7 str. Sakai DNA, complete genome	894192	894197	TTTTTT
NC_002695.2 Escherichia coli O157:H7 str. Sakai DNA, complete genome	894730	894735	TTTTTT
NC_002695.2 Escherichia coli O157:H7 str. Sakai DNA, complete genome	896982	896987	AAAAAA
NC_002695.2 Escherichia coli O157:H7 str. Sakai DNA, complete genome	897101	897106	AAAAAA
NC_002695.2 Escherichia coli O157:H7 str. Sakai DNA, complete genome	897131	897136	AAAAAA
NC_002695.2 Escherichia coli O157:H7 str. Sakai DNA, complete genome	897409	897415	AAAAAAA
NC_002695.2 Escherichia coli O157:H7 str. Sakai DNA, complete genome	897893	897899	AAAAAAA
NC_002695.2 Escherichia coli O157:H7 str. Sakai DNA, complete genome	898841	898847	TTTTTTT
NC_002695.2 Escherichia coli O157:H7 str. Sakai DNA, complete genome	898866	898873	TTTTTTTT
NC_002695.2 Escherichia coli O157:H7 str. Sakai DNA, complete genome	898968	898973	TTTTTT
NC_002695.2 Escherichia coli O157:H7 str. Sakai DNA, complete genome	899041	899046	TTTTTT
NC_002695.2 Escherichia coli O157:H7 str. Sakai DNA, complete genome	899117	899123	AAAAAAA
NC_002695.2 Escherichia coli O157:H7 str. Sakai DNA, complete genome	899124	899130	GGGGGGG
NC_002695.2 Escherichia coli O157:H7 str. Sakai DNA, complete genome	899864	899869	AAAAAA
NC_002695.2 Escherichia coli O157:H7 str. Sakai DNA, complete genome	900049	900054	AAAAAA
NC_002695.2 Escherichia coli O157:H7 str. Sakai DNA, complete genome	900079	900085	TTTTTTT
NC_002695.2 Escherichia coli O157:H7 str. Sakai DNA, complete genome	900138	900144	TTTTTTT
NC_002695.2 Escherichia coli O157:H7 str. Sakai DNA, complete genome	900387	900392	TTTTTT
NC_002695.2 Escherichia coli O157:H7 str. Sakai DNA, complete genome	900677	900683	AAAAAAA
NC_002695.2 Escherichia coli O157:H7 str. Sakai DNA, complete genome	900686	900692	TTTTTTT
NC_002695.2 Escherichia coli O157:H7 str. Sakai DNA, complete genome	900730	900735	TTTTTT
NC_002695.2 Escherichia coli O157:H7 str. Sakai DNA, complete genome	901194	901199	TTTTTT
NC_002695.2 Escherichia coli O157:H7 str. Sakai DNA, complete genome	901214	901219	AAAAAA
NC_002695.2 Escherichia coli O157:H7 str. Sakai DNA, complete genome	901391	901398	TTTTTTTT
NC_002695.2 Escherichia coli O157:H7 str. Sakai DNA, complete genome	901580	901585	AAAAAA
NC_002695.2 Escherichia coli O157:H7 str. Sakai DNA, complete genome	901820	901825	AAAAAA
NC_002695.2 Escherichia coli O157:H7 str. Sakai DNA, complete genome	902630	902635	AAAAAA
NC_002695.2 Escherichia coli O157:H7 str. Sakai DNA, complete genome	903176	903181	TTTTTT
NC_002695.2 Escherichia coli O157:H7 str. Sakai DNA, complete genome	903701	903706	TTTTTT
NC_002695.2 Escherichia coli O157:H7 str. Sakai DNA, complete genome	903724	903729	TTTTTT
NC_002695.2 Escherichia coli O157:H7 str. Sakai DNA, complete genome	904628	904633	AAAAAA
NC_002695.2 Escherichia coli O157:H7 str. Sakai DNA, complete genome	906320	906325	AAAAAA
NC_002695.2 Escherichia coli O157:H7 str. Sakai DNA, complete genome	906628	906633	TTTTTT
NC_002695.2 Escherichia coli O157:H7 str. Sakai DNA, complete genome	907625	907630	TTTTTT
NC_002695.2 Escherichia coli O157:H7 str. Sakai DNA, complete genome	909081	909086	AAAAAA
NC_002695.2 Escherichia coli O157:H7 str. Sakai DNA, complete genome	909355	909360	GGGGGG
NC_002695.2 Escherichia coli O157:H7 str. Sakai DNA, complete genome	910118	910124	TTTTTTT
NC_002695.2 Escherichia coli O157:H7 str. Sakai DNA, complete genome	911418	911423	TTTTTT
NC_002695.2 Escherichia coli O157:H7 str. Sakai DNA, complete genome	912037	912042	AAAAAA
NC_002695.2 Escherichia coli O157:H7 str. Sakai DNA, complete genome	912540	912545	TTTTTT
NC_002695.2 Escherichia coli O157:H7 str. Sakai DNA, complete genome	914842	914847	AAAAAA
NC_002695.2 Escherichia coli O157:H7 str. Sakai DNA, complete genome	915082	915088	AAAAAAA
NC_002695.2 Escherichia coli O157:H7 str. Sakai DNA, complete genome	915268	915273	AAAAAA
NC_002695.2 Escherichia coli O157:H7 str. Sakai DNA, complete genome	915391	915397	AAAAAAA
NC_002695.2 Escherichia coli O157:H7 str. Sakai DNA, complete genome	915970	915975	GGGGGG
NC_002695.2 Escherichia coli O157:H7 str. Sakai DNA, complete genome	916033	916038	TTTTTT
NC_002695.2 Escherichia coli O157:H7 str. Sakai DNA, complete genome	916252	916257	AAAAAA
NC_002695.2 Escherichia coli O157:H7 str. Sakai DNA, complete genome	916769	916774	TTTTTT
NC_002695.2 Escherichia coli O157:H7 str. Sakai DNA, complete genome	921162	921167	TTTTTT
NC_002695.2 Escherichia coli O157:H7 str. Sakai DNA, complete genome	922096	922101	AAAAAA
NC_002695.2 Escherichia coli O157:H7 str. Sakai DNA, complete genome	922169	922174	TTTTTT
NC_002695.2 Escherichia coli O157:H7 str. Sakai DNA, complete genome	922431	922436	AAAAAA
NC_002695.2 Escherichia coli O157:H7 str. Sakai DNA, complete genome	922677	922682	GGGGGG
NC_002695.2 Escherichia coli O157:H7 str. Sakai DNA, complete genome	922841	922846	TTTTTT
NC_002695.2 Escherichia coli O157:H7 str. Sakai DNA, complete genome	923460	923465	AAAAAA
NC_002695.2 Escherichia coli O157:H7 str. Sakai DNA, complete genome	924734	924739	AAAAAA
NC_002695.2 Escherichia coli O157:H7 str. Sakai DNA, complete genome	927108	927113	TTTTTT
NC_002695.2 Escherichia coli O157:H7 str. Sakai DNA, complete genome	927139	927146	TTTTTTTT
NC_002695.2 Escherichia coli O157:H7 str. Sakai DNA, complete genome	927429	927434	GGGGGG
NC_002695.2 Escherichia coli O157:H7 str. Sakai DNA, complete genome	927906	927911	GGGGGG
NC_002695.2 Escherichia coli O157:H7 str. Sakai DNA, complete genome	928042	928047	AAAAAA
NC_002695.2 Escherichia coli O157:H7 str. Sakai DNA, complete genome	928532	928538	AAAAAAA
NC_002695.2 Escherichia coli O157:H7 str. Sakai DNA, complete genome	928702	928707	AAAAAA
NC_002695.2 Escherichia coli O157:H7 str. Sakai DNA, complete genome	929509	929514	AAAAAA
NC_002695.2 Escherichia coli O157:H7 str. Sakai DNA, complete genome	929634	929639	TTTTTT
NC_002695.2 Escherichia coli O157:H7 str. Sakai DNA, complete genome	929697	929702	TTTTTT
NC_002695.2 Escherichia coli O157:H7 str. Sakai DNA, complete genome	930343	930349	AAAAAAA
NC_002695.2 Escherichia coli O157:H7 str. Sakai DNA, complete genome	931686	931691	AAAAAA
NC_002695.2 Escherichia coli O157:H7 str. Sakai DNA, complete genome	934616	934622	TTTTTTT
NC_002695.2 Escherichia coli O157:H7 str. Sakai DNA, complete genome	935399	935405	AAAAAAA
NC_002695.2 Escherichia coli O157:H7 str. Sakai DNA, complete genome	935593	935598	TTTTTT
NC_002695.2 Escherichia coli O157:H7 str. Sakai DNA, complete genome	935681	935686	AAAAAA
NC_002695.2 Escherichia coli O157:H7 str. Sakai DNA, complete genome	935804	935810	TTTTTTT
NC_002695.2 Escherichia coli O157:H7 str. Sakai DNA, complete genome	940648	940654	GGGGGGG
NC_002695.2 Escherichia coli O157:H7 str. Sakai DNA, complete genome	941427	941433	TTTTTTT
NC_002695.2 Escherichia coli O157:H7 str. Sakai DNA, complete genome	942957	942962	TTTTTT
NC_002695.2 Escherichia coli O157:H7 str. Sakai DNA, complete genome	942993	943000	TTTTTTTT
NC_002695.2 Escherichia coli O157:H7 str. Sakai DNA, complete genome	943276	943281	GGGGGG
NC_002695.2 Escherichia coli O157:H7 str. Sakai DNA, complete genome	943862	943868	TTTTTTT
NC_002695.2 Escherichia coli O157:H7 str. Sakai DNA, complete genome	944768	944773	TTTTTT
NC_002695.2 Escherichia coli O157:H7 str. Sakai DNA, complete genome	944807	944812	AAAAAA
NC_002695.2 Escherichia coli O157:H7 str. Sakai DNA, complete genome	948823	948828	AAAAAA
NC_002695.2 Escherichia coli O157:H7 str. Sakai DNA, complete genome	950029	950034	TTTTTT
NC_002695.2 Escherichia coli O157:H7 str. Sakai DNA, complete genome	950537	950542	TTTTTT
NC_002695.2 Escherichia coli O157:H7 str. Sakai DNA, complete genome	952182	952187	CCCCCC
NC_002695.2 Escherichia coli O157:H7 str. Sakai DNA, complete genome	952329	952334	TTTTTT
NC_002695.2 Escherichia coli O157:H7 str. Sakai DNA, complete genome	952967	952972	TTTTTT
NC_002695.2 Escherichia coli O157:H7 str. Sakai DNA, complete genome	954332	954337	AAAAAA
NC_002695.2 Escherichia coli O157:H7 str. Sakai DNA, complete genome	955377	955382	AAAAAA
NC_002695.2 Escherichia coli O157:H7 str. Sakai DNA, complete genome	955935	955940	GGGGGG
NC_002695.2 Escherichia coli O157:H7 str. Sakai DNA, complete genome	957737	957742	AAAAAA
NC_002695.2 Escherichia coli O157:H7 str. Sakai DNA, complete genome	958129	958134	TTTTTT
NC_002695.2 Escherichia coli O157:H7 str. Sakai DNA, complete genome	959104	959109	AAAAAA
NC_002695.2 Escherichia coli O157:H7 str. Sakai DNA, complete genome	959627	959632	AAAAAA
NC_002695.2 Escherichia coli O157:H7 str. Sakai DNA, complete genome	960753	960759	AAAAAAA
NC_002695.2 Escherichia coli O157:H7 str. Sakai DNA, complete genome	961876	961883	AAAAAAAA
NC_002695.2 Escherichia coli O157:H7 str. Sakai DNA, complete genome	962432	962438	TTTTTTT
NC_002695.2 Escherichia coli O157:H7 str. Sakai DNA, complete genome	965326	965331	TTTTTT
NC_002695.2 Escherichia coli O157:H7 str. Sakai DNA, complete genome	965669	965674	AAAAAA
NC_002695.2 Escherichia coli O157:H7 str. Sakai DNA, complete genome	966186	966191	TTTTTT
NC_002695.2 Escherichia coli O157:H7 str. Sakai DNA, complete genome	966579	966584	AAAAAA
NC_002695.2 Escherichia coli O157:H7 str. Sakai DNA, complete genome	966603	966608	TTTTTT
NC_002695.2 Escherichia coli O157:H7 str. Sakai DNA, complete genome	967612	967617	AAAAAA
NC_002695.2 Escherichia coli O157:H7 str. Sakai DNA, complete genome	967815	967820	TTTTTT
NC_002695.2 Escherichia coli O157:H7 str. Sakai DNA, complete genome	968976	968981	TTTTTT
NC_002695.2 Escherichia coli O157:H7 str. Sakai DNA, complete genome	969200	969205	AAAAAA
NC_002695.2 Escherichia coli O157:H7 str. Sakai DNA, complete genome	969412	969418	TTTTTTT
NC_002695.2 Escherichia coli O157:H7 str. Sakai DNA, complete genome	969795	969802	TTTTTTTT
NC_002695.2 Escherichia coli O157:H7 str. Sakai DNA, complete genome	971589	971594	TTTTTT
NC_002695.2 Escherichia coli O157:H7 str. Sakai DNA, complete genome	972015	972020	TTTTTT
NC_002695.2 Escherichia coli O157:H7 str. Sakai DNA, complete genome	972234	972239	TTTTTT
NC_002695.2 Escherichia coli O157:H7 str. Sakai DNA, complete genome	972321	972326	TTTTTT
NC_002695.2 Escherichia coli O157:H7 str. Sakai DNA, complete genome	972368	972373	AAAAAA
NC_002695.2 Escherichia coli O157:H7 str. Sakai DNA, complete genome	972533	972538	AAAAAA
NC_002695.2 Escherichia coli O157:H7 str. Sakai DNA, complete genome	972576	972581	AAAAAA
NC_002695.2 Escherichia coli O157:H7 str. Sakai DNA, complete genome	973138	973143	TTTTTT
NC_002695.2 Escherichia coli O157:H7 str. Sakai DNA, complete genome	974140	974145	AAAAAA
NC_002695.2 Escherichia coli O157:H7 str. Sakai DNA, complete genome	974484	974489	AAAAAA
NC_002695.2 Escherichia coli O157:H7 str. Sakai DNA, complete genome	974760	974766	AAAAAAA
NC_002695.2 Escherichia coli O157:H7 str. Sakai DNA, complete genome	975288	975293	AAAAAA
NC_002695.2 Escherichia coli O157:H7 str. Sakai DNA, complete genome	976443	976448	AAAAAA
NC_002695.2 Escherichia coli O157:H7 str. Sakai DNA, complete genome	976512	976518	TTTTTTT
NC_002695.2 Escherichia coli O157:H7 str. Sakai DNA, complete genome	977406	977411	TTTTTT
NC_002695.2 Escherichia coli O157:H7 str. Sakai DNA, complete genome	977519	977525	AAAAAAA
NC_002695.2 Escherichia coli O157:H7 str. Sakai DNA, complete genome	977965	977970	TTTTTT
NC_002695.2 Escherichia coli O157:H7 str. Sakai DNA, complete genome	977992	977998	TTTTTTT
NC_002695.2 Escherichia coli O157:H7 str. Sakai DNA, complete genome	978031	978036	TTTTTT
NC_002695.2 Escherichia coli O157:H7 str. Sakai DNA, complete genome	979085	979090	AAAAAA
NC_002695.2 Escherichia coli O157:H7 str. Sakai DNA, complete genome	980164	980169	TTTTTT
NC_002695.2 Escherichia coli O157:H7 str. Sakai DNA, complete genome	984524	984529	TTTTTT
NC_002695.2 Escherichia coli O157:H7 str. Sakai DNA, complete genome	987101	987107	TTTTTTT
NC_002695.2 Escherichia coli O157:H7 str. Sakai DNA, complete genome	987123	987128	TTTTTT
NC_002695.2 Escherichia coli O157:H7 str. Sakai DNA, complete genome	987979	987984	AAAAAA
NC_002695.2 Escherichia coli O157:H7 str. Sakai DNA, complete genome	989676	989682	TTTTTTT
NC_002695.2 Escherichia coli O157:H7 str. Sakai DNA, complete genome	990150	990155	AAAAAA
NC_002695.2 Escherichia coli O157:H7 str. Sakai DNA, complete genome	992750	992757	CCCCCCCC
NC_002695.2 Escherichia coli O157:H7 str. Sakai DNA, complete genome	994349	994354	AAAAAA
NC_002695.2 Escherichia coli O157:H7 str. Sakai DNA, complete genome	996742	996747	TTTTTT
NC_002695.2 Escherichia coli O157:H7 str. Sakai DNA, complete genome	997390	997396	TTTTTTT
NC_002695.2 Escherichia coli O157:H7 str. Sakai DNA, complete genome	997538	997543	AAAAAA
NC_002695.2 Escherichia coli O157:H7 str. Sakai DNA, complete genome	997827	997832	AAAAAA
NC_002695.2 Escherichia coli O157:H7 str. Sakai DNA, complete genome	998083	998088	AAAAAA
NC_002695.2 Escherichia coli O157:H7 str. Sakai DNA, complete genome	998170	998175	TTTTTT
NC_002695.2 Escherichia coli O157:H7 str. Sakai DNA, complete genome	1000330	1000335	AAAAAA
NC_002695.2 Escherichia coli O157:H7 str. Sakai DNA, complete genome	1000525	1000530	AAAAAA
NC_002695.2 Escherichia coli O157:H7 str. Sakai DNA, complete genome	1001476	1001482	TTTTTTT
NC_002695.2 Escherichia coli O157:H7 str. Sakai DNA, complete genome	1001557	1001563	AAAAAAA
NC_002695.2 Escherichia coli O157:H7 str. Sakai DNA, complete genome	1001582	1001587	AAAAAA
NC_002695.2 Escherichia coli O157:H7 str. Sakai DNA, complete genome	1001636	1001641	TTTTTT
NC_002695.2 Escherichia coli O157:H7 str. Sakai DNA, complete genome	1001729	1001734	TTTTTT
NC_002695.2 Escherichia coli O157:H7 str. Sakai DNA, complete genome	1003330	1003335	AAAAAA
NC_002695.2 Escherichia coli O157:H7 str. Sakai DNA, complete genome	1003482	1003487	AAAAAA
NC_002695.2 Escherichia coli O157:H7 str. Sakai DNA, complete genome	1003672	1003677	TTTTTT
NC_002695.2 Escherichia coli O157:H7 str. Sakai DNA, complete genome	1004872	1004877	TTTTTT
NC_002695.2 Escherichia coli O157:H7 str. Sakai DNA, complete genome	1005725	1005731	TTTTTTT
NC_002695.2 Escherichia coli O157:H7 str. Sakai DNA, complete genome	1005853	1005859	AAAAAAA
NC_002695.2 Escherichia coli O157:H7 str. Sakai DNA, complete genome	1005985	1005991	TTTTTTT
NC_002695.2 Escherichia coli O157:H7 str. Sakai DNA, complete genome	1006492	1006497	AAAAAA
NC_002695.2 Escherichia coli O157:H7 str. Sakai DNA, complete genome	1007050	1007055	AAAAAA
NC_002695.2 Escherichia coli O157:H7 str. Sakai DNA, complete genome	1007729	1007734	AAAAAA
NC_002695.2 Escherichia coli O157:H7 str. Sakai DNA, complete genome	1010192	1010198	AAAAAAA
NC_002695.2 Escherichia coli O157:H7 str. Sakai DNA, complete genome	1010930	1010935	TTTTTT
NC_002695.2 Escherichia coli O157:H7 str. Sakai DNA, complete genome	1011069	1011074	TTTTTT
NC_002695.2 Escherichia coli O157:H7 str. Sakai DNA, complete genome	1011091	1011096	TTTTTT
NC_002695.2 Escherichia coli O157:H7 str. Sakai DNA, complete genome	1011362	1011367	TTTTTT
NC_002695.2 Escherichia coli O157:H7 str. Sakai DNA, complete genome	1012742	1012747	AAAAAA
NC_002695.2 Escherichia coli O157:H7 str. Sakai DNA, complete genome	1012930	1012935	TTTTTT
NC_002695.2 Escherichia coli O157:H7 str. Sakai DNA, complete genome	1013267	1013272	AAAAAA
NC_002695.2 Escherichia coli O157:H7 str. Sakai DNA, complete genome	1013390	1013396	AAAAAAA
NC_002695.2 Escherichia coli O157:H7 str. Sakai DNA, complete genome	1014850	1014857	AAAAAAAA
NC_002695.2 Escherichia coli O157:H7 str. Sakai DNA, complete genome	1014861	1014867	AAAAAAA
NC_002695.2 Escherichia coli O157:H7 str. Sakai DNA, complete genome	1015167	1015172	TTTTTT
NC_002695.2 Escherichia coli O157:H7 str. Sakai DNA, complete genome	1015620	1015626	TTTTTTT
NC_002695.2 Escherichia coli O157:H7 str. Sakai DNA, complete genome	1015742	1015747	AAAAAA
NC_002695.2 Escherichia coli O157:H7 str. Sakai DNA, complete genome	1016594	1016599	TTTTTT
NC_002695.2 Escherichia coli O157:H7 str. Sakai DNA, complete genome	1018066	1018071	AAAAAA
NC_002695.2 Escherichia coli O157:H7 str. Sakai DNA, complete genome	1018310	1018316	TTTTTTT
NC_002695.2 Escherichia coli O157:H7 str. Sakai DNA, complete genome	1018877	1018882	TTTTTT
NC_002695.2 Escherichia coli O157:H7 str. Sakai DNA, complete genome	1018990	1018995	AAAAAA
NC_002695.2 Escherichia coli O157:H7 str. Sakai DNA, complete genome	1019087	1019092	AAAAAA
NC_002695.2 Escherichia coli O157:H7 str. Sakai DNA, complete genome	1019157	1019162	AAAAAA
NC_002695.2 Escherichia coli O157:H7 str. Sakai DNA, complete genome	1021177	1021182	AAAAAA
NC_002695.2 Escherichia coli O157:H7 str. Sakai DNA, complete genome	1021895	1021900	AAAAAA
NC_002695.2 Escherichia coli O157:H7 str. Sakai DNA, complete genome	1022350	1022355	AAAAAA
NC_002695.2 Escherichia coli O157:H7 str. Sakai DNA, complete genome	1023298	1023303	TTTTTT
NC_002695.2 Escherichia coli O157:H7 str. Sakai DNA, complete genome	1024537	1024542	GGGGGG
NC_002695.2 Escherichia coli O157:H7 str. Sakai DNA, complete genome	1025555	1025560	TTTTTT
NC_002695.2 Escherichia coli O157:H7 str. Sakai DNA, complete genome	1026240	1026245	TTTTTT
NC_002695.2 Escherichia coli O157:H7 str. Sakai DNA, complete genome	1026653	1026658	AAAAAA
NC_002695.2 Escherichia coli O157:H7 str. Sakai DNA, complete genome	1026755	1026760	AAAAAA
NC_002695.2 Escherichia coli O157:H7 str. Sakai DNA, complete genome	1027909	1027914	TTTTTT
NC_002695.2 Escherichia coli O157:H7 str. Sakai DNA, complete genome	1028829	1028834	TTTTTT
NC_002695.2 Escherichia coli O157:H7 str. Sakai DNA, complete genome	1029289	1029295	AAAAAAA
NC_002695.2 Escherichia coli O157:H7 str. Sakai DNA, complete genome	1029734	1029739	TTTTTT
NC_002695.2 Escherichia coli O157:H7 str. Sakai DNA, complete genome	1030834	1030839	AAAAAA
NC_002695.2 Escherichia coli O157:H7 str. Sakai DNA, complete genome	1031203	1031208	TTTTTT
NC_002695.2 Escherichia coli O157:H7 str. Sakai DNA, complete genome	1031578	1031583	TTTTTT
NC_002695.2 Escherichia coli O157:H7 str. Sakai DNA, complete genome	1032946	1032952	CCCCCCC
NC_002695.2 Escherichia coli O157:H7 str. Sakai DNA, complete genome	1033910	1033915	AAAAAA
NC_002695.2 Escherichia coli O157:H7 str. Sakai DNA, complete genome	1033968	1033973	TTTTTT
NC_002695.2 Escherichia coli O157:H7 str. Sakai DNA, complete genome	1033998	1034003	AAAAAA
NC_002695.2 Escherichia coli O157:H7 str. Sakai DNA, complete genome	1034871	1034876	AAAAAA
NC_002695.2 Escherichia coli O157:H7 str. Sakai DNA, complete genome	1035024	1035030	TTTTTTT
NC_002695.2 Escherichia coli O157:H7 str. Sakai DNA, complete genome	1037740	1037745	TTTTTT
NC_002695.2 Escherichia coli O157:H7 str. Sakai DNA, complete genome	1045290	1045295	AAAAAA
NC_002695.2 Escherichia coli O157:H7 str. Sakai DNA, complete genome	1045842	1045847	AAAAAA
NC_002695.2 Escherichia coli O157:H7 str. Sakai DNA, complete genome	1047183	1047188	AAAAAA
NC_002695.2 Escherichia coli O157:H7 str. Sakai DNA, complete genome	1047355	1047360	AAAAAA
NC_002695.2 Escherichia coli O157:H7 str. Sakai DNA, complete genome	1047877	1047882	TTTTTT
NC_002695.2 Escherichia coli O157:H7 str. Sakai DNA, complete genome	1049157	1049163	AAAAAAA
NC_002695.2 Escherichia coli O157:H7 str. Sakai DNA, complete genome	1049279	1049284	TTTTTT
NC_002695.2 Escherichia coli O157:H7 str. Sakai DNA, complete genome	1050559	1050565	AAAAAAA
NC_002695.2 Escherichia coli O157:H7 str. Sakai DNA, complete genome	1056476	1056481	AAAAAA
NC_002695.2 Escherichia coli O157:H7 str. Sakai DNA, complete genome	1056760	1056765	AAAAAA
NC_002695.2 Escherichia coli O157:H7 str. Sakai DNA, complete genome	1056921	1056928	AAAAAAAA
NC_002695.2 Escherichia coli O157:H7 str. Sakai DNA, complete genome	1056971	1056977	GGGGGGG
NC_002695.2 Escherichia coli O157:H7 str. Sakai DNA, complete genome	1059790	1059795	GGGGGG
NC_002695.2 Escherichia coli O157:H7 str. Sakai DNA, complete genome	1061273	1061278	AAAAAA
NC_002695.2 Escherichia coli O157:H7 str. Sakai DNA, complete genome	1062097	1062102	AAAAAA
NC_002695.2 Escherichia coli O157:H7 str. Sakai DNA, complete genome	1062573	1062578	TTTTTT
NC_002695.2 Escherichia coli O157:H7 str. Sakai DNA, complete genome	1063186	1063192	AAAAAAA
NC_002695.2 Escherichia coli O157:H7 str. Sakai DNA, complete genome	1063411	1063418	AAAAAAAA
NC_002695.2 Escherichia coli O157:H7 str. Sakai DNA, complete genome	1065967	1065972	AAAAAA
NC_002695.2 Escherichia coli O157:H7 str. Sakai DNA, complete genome	1067161	1067166	AAAAAA
NC_002695.2 Escherichia coli O157:H7 str. Sakai DNA, complete genome	1067579	1067584	AAAAAA
NC_002695.2 Escherichia coli O157:H7 str. Sakai DNA, complete genome	1067671	1067676	AAAAAA
NC_002695.2 Escherichia coli O157:H7 str. Sakai DNA, complete genome	1067734	1067739	AAAAAA
NC_002695.2 Escherichia coli O157:H7 str. Sakai DNA, complete genome	1068488	1068494	AAAAAAA
NC_002695.2 Escherichia coli O157:H7 str. Sakai DNA, complete genome	1071873	1071879	TTTTTTT
NC_002695.2 Escherichia coli O157:H7 str. Sakai DNA, complete genome	1074545	1074550	TTTTTT
NC_002695.2 Escherichia coli O157:H7 str. Sakai DNA, complete genome	1075004	1075009	AAAAAA
NC_002695.2 Escherichia coli O157:H7 str. Sakai DNA, complete genome	1075425	1075430	TTTTTT
NC_002695.2 Escherichia coli O157:H7 str. Sakai DNA, complete genome	1076354	1076359	TTTTTT
NC_002695.2 Escherichia coli O157:H7 str. Sakai DNA, complete genome	1076931	1076936	TTTTTT
NC_002695.2 Escherichia coli O157:H7 str. Sakai DNA, complete genome	1078177	1078182	TTTTTT
NC_002695.2 Escherichia coli O157:H7 str. Sakai DNA, complete genome	1078203	1078208	TTTTTT
NC_002695.2 Escherichia coli O157:H7 str. Sakai DNA, complete genome	1078465	1078470	TTTTTT
NC_002695.2 Escherichia coli O157:H7 str. Sakai DNA, complete genome	1079942	1079947	AAAAAA
NC_002695.2 Escherichia coli O157:H7 str. Sakai DNA, complete genome	1080434	1080439	TTTTTT
NC_002695.2 Escherichia coli O157:H7 str. Sakai DNA, complete genome	1080830	1080835	AAAAAA
NC_002695.2 Escherichia coli O157:H7 str. Sakai DNA, complete genome	1080848	1080853	AAAAAA
NC_002695.2 Escherichia coli O157:H7 str. Sakai DNA, complete genome	1082790	1082796	TTTTTTT
NC_002695.2 Escherichia coli O157:H7 str. Sakai DNA, complete genome	1083223	1083228	TTTTTT
NC_002695.2 Escherichia coli O157:H7 str. Sakai DNA, complete genome	1084295	1084300	TTTTTT
NC_002695.2 Escherichia coli O157:H7 str. Sakai DNA, complete genome	1084451	1084457	AAAAAAA
NC_002695.2 Escherichia coli O157:H7 str. Sakai DNA, complete genome	1086019	1086024	AAAAAA
NC_002695.2 Escherichia coli O157:H7 str. Sakai DNA, complete genome	1087627	1087632	AAAAAA
NC_002695.2 Escherichia coli O157:H7 str. Sakai DNA, complete genome	1089297	1089302	AAAAAA
NC_002695.2 Escherichia coli O157:H7 str. Sakai DNA, complete genome	1089802	1089809	TTTTTTTT
NC_002695.2 Escherichia coli O157:H7 str. Sakai DNA, complete genome	1092866	1092871	AAAAAA
NC_002695.2 Escherichia coli O157:H7 str. Sakai DNA, complete genome	1093801	1093806	TTTTTT
NC_002695.2 Escherichia coli O157:H7 str. Sakai DNA, complete genome	1096256	1096261	TTTTTT
NC_002695.2 Escherichia coli O157:H7 str. Sakai DNA, complete genome	1098016	1098021	AAAAAA
NC_002695.2 Escherichia coli O157:H7 str. Sakai DNA, complete genome	1098738	1098743	TTTTTT
NC_002695.2 Escherichia coli O157:H7 str. Sakai DNA, complete genome	1099354	1099359	AAAAAA
NC_002695.2 Escherichia coli O157:H7 str. Sakai DNA, complete genome	1101150	1101155	AAAAAA
NC_002695.2 Escherichia coli O157:H7 str. Sakai DNA, complete genome	1102454	1102459	AAAAAA
NC_002695.2 Escherichia coli O157:H7 str. Sakai DNA, complete genome	1102933	1102938	TTTTTT
NC_002695.2 Escherichia coli O157:H7 str. Sakai DNA, complete genome	1103024	1103029	TTTTTT
NC_002695.2 Escherichia coli O157:H7 str. Sakai DNA, complete genome	1103058	1103063	TTTTTT
NC_002695.2 Escherichia coli O157:H7 str. Sakai DNA, complete genome	1103705	1103710	AAAAAA
NC_002695.2 Escherichia coli O157:H7 str. Sakai DNA, complete genome	1104009	1104014	AAAAAA
NC_002695.2 Escherichia coli O157:H7 str. Sakai DNA, complete genome	1107335	1107340	AAAAAA
NC_002695.2 Escherichia coli O157:H7 str. Sakai DNA, complete genome	1109059	1109064	AAAAAA
NC_002695.2 Escherichia coli O157:H7 str. Sakai DNA, complete genome	1110486	1110491	AAAAAA
NC_002695.2 Escherichia coli O157:H7 str. Sakai DNA, complete genome	1111488	1111493	GGGGGG
NC_002695.2 Escherichia coli O157:H7 str. Sakai DNA, complete genome	1112930	1112935	TTTTTT
NC_002695.2 Escherichia coli O157:H7 str. Sakai DNA, complete genome	1113399	1113404	AAAAAA
NC_002695.2 Escherichia coli O157:H7 str. Sakai DNA, complete genome	1113707	1113712	TTTTTT
NC_002695.2 Escherichia coli O157:H7 str. Sakai DNA, complete genome	1113950	1113955	AAAAAA
NC_002695.2 Escherichia coli O157:H7 str. Sakai DNA, complete genome	1114832	1114837	TTTTTT
NC_002695.2 Escherichia coli O157:H7 str. Sakai DNA, complete genome	1115311	1115318	AAAAAAAA
NC_002695.2 Escherichia coli O157:H7 str. Sakai DNA, complete genome	1115335	1115340	TTTTTT
NC_002695.2 Escherichia coli O157:H7 str. Sakai DNA, complete genome	1115759	1115764	TTTTTT
NC_002695.2 Escherichia coli O157:H7 str. Sakai DNA, complete genome	1116473	1116480	TTTTTTTT
NC_002695.2 Escherichia coli O157:H7 str. Sakai DNA, complete genome	1116641	1116646	AAAAAA
NC_002695.2 Escherichia coli O157:H7 str. Sakai DNA, complete genome	1116840	1116846	AAAAAAA
NC_002695.2 Escherichia coli O157:H7 str. Sakai DNA, complete genome	1116875	1116880	AAAAAA
NC_002695.2 Escherichia coli O157:H7 str. Sakai DNA, complete genome	1116907	1116912	TTTTTT
NC_002695.2 Escherichia coli O157:H7 str. Sakai DNA, complete genome	1117017	1117022	AAAAAA
NC_002695.2 Escherichia coli O157:H7 str. Sakai DNA, complete genome	1118482	1118487	AAAAAA
NC_002695.2 Escherichia coli O157:H7 str. Sakai DNA, complete genome	1118511	1118516	GGGGGG
NC_002695.2 Escherichia coli O157:H7 str. Sakai DNA, complete genome	1118593	1118599	AAAAAAA
NC_002695.2 Escherichia coli O157:H7 str. Sakai DNA, complete genome	1118635	1118640	TTTTTT
NC_002695.2 Escherichia coli O157:H7 str. Sakai DNA, complete genome	1124085	1124090	AAAAAA
NC_002695.2 Escherichia coli O157:H7 str. Sakai DNA, complete genome	1125515	1125520	TTTTTT
NC_002695.2 Escherichia coli O157:H7 str. Sakai DNA, complete genome	1125753	1125759	TTTTTTT
NC_002695.2 Escherichia coli O157:H7 str. Sakai DNA, complete genome	1127344	1127350	AAAAAAA
NC_002695.2 Escherichia coli O157:H7 str. Sakai DNA, complete genome	1127607	1127612	AAAAAA
NC_002695.2 Escherichia coli O157:H7 str. Sakai DNA, complete genome	1127943	1127948	TTTTTT
NC_002695.2 Escherichia coli O157:H7 str. Sakai DNA, complete genome	1128179	1128184	AAAAAA
NC_002695.2 Escherichia coli O157:H7 str. Sakai DNA, complete genome	1128870	1128875	AAAAAA
NC_002695.2 Escherichia coli O157:H7 str. Sakai DNA, complete genome	1129461	1129466	TTTTTT
NC_002695.2 Escherichia coli O157:H7 str. Sakai DNA, complete genome	1130488	1130495	AAAAAAAA
NC_002695.2 Escherichia coli O157:H7 str. Sakai DNA, complete genome	1131324	1131329	TTTTTT
NC_002695.2 Escherichia coli O157:H7 str. Sakai DNA, complete genome	1132367	1132374	AAAAAAAA
NC_002695.2 Escherichia coli O157:H7 str. Sakai DNA, complete genome	1132956	1132962	GGGGGGG
NC_002695.2 Escherichia coli O157:H7 str. Sakai DNA, complete genome	1134153	1134160	TTTTTTTT
NC_002695.2 Escherichia coli O157:H7 str. Sakai DNA, complete genome	1134620	1134626	AAAAAAA
NC_002695.2 Escherichia coli O157:H7 str. Sakai DNA, complete genome	1134718	1134723	AAAAAA
NC_002695.2 Escherichia coli O157:H7 str. Sakai DNA, complete genome	1136038	1136043	TTTTTT
NC_002695.2 Escherichia coli O157:H7 str. Sakai DNA, complete genome	1138525	1138530	AAAAAA
NC_002695.2 Escherichia coli O157:H7 str. Sakai DNA, complete genome	1139354	1139359	AAAAAA
NC_002695.2 Escherichia coli O157:H7 str. Sakai DNA, complete genome	1141059	1141066	AAAAAAAA
NC_002695.2 Escherichia coli O157:H7 str. Sakai DNA, complete genome	1141328	1141333	AAAAAA
NC_002695.2 Escherichia coli O157:H7 str. Sakai DNA, complete genome	1141609	1141614	CCCCCC
NC_002695.2 Escherichia coli O157:H7 str. Sakai DNA, complete genome	1141744	1141749	TTTTTT
NC_002695.2 Escherichia coli O157:H7 str. Sakai DNA, complete genome	1142831	1142836	TTTTTT
NC_002695.2 Escherichia coli O157:H7 str. Sakai DNA, complete genome	1143223	1143228	AAAAAA
NC_002695.2 Escherichia coli O157:H7 str. Sakai DNA, complete genome	1144336	1144341	AAAAAA
NC_002695.2 Escherichia coli O157:H7 str. Sakai DNA, complete genome	1144981	1144987	TTTTTTT
NC_002695.2 Escherichia coli O157:H7 str. Sakai DNA, complete genome	1145024	1145029	TTTTTT
NC_002695.2 Escherichia coli O157:H7 str. Sakai DNA, complete genome	1145571	1145576	TTTTTT
NC_002695.2 Escherichia coli O157:H7 str. Sakai DNA, complete genome	1147780	1147785	TTTTTT
NC_002695.2 Escherichia coli O157:H7 str. Sakai DNA, complete genome	1148227	1148232	AAAAAA
NC_002695.2 Escherichia coli O157:H7 str. Sakai DNA, complete genome	1148441	1148448	AAAAAAAA
NC_002695.2 Escherichia coli O157:H7 str. Sakai DNA, complete genome	1149525	1149530	TTTTTT
NC_002695.2 Escherichia coli O157:H7 str. Sakai DNA, complete genome	1149717	1149724	AAAAAAAA
NC_002695.2 Escherichia coli O157:H7 str. Sakai DNA, complete genome	1149749	1149754	TTTTTT
NC_002695.2 Escherichia coli O157:H7 str. Sakai DNA, complete genome	1149850	1149856	AAAAAAA
NC_002695.2 Escherichia coli O157:H7 str. Sakai DNA, complete genome	1151925	1151930	AAAAAA
NC_002695.2 Escherichia coli O157:H7 str. Sakai DNA, complete genome	1153131	1153136	AAAAAA
NC_002695.2 Escherichia coli O157:H7 str. Sakai DNA, complete genome	1153869	1153875	TTTTTTT
NC_002695.2 Escherichia coli O157:H7 str. Sakai DNA, complete genome	1154503	1154508	TTTTTT
NC_002695.2 Escherichia coli O157:H7 str. Sakai DNA, complete genome	1154804	1154809	AAAAAA
NC_002695.2 Escherichia coli O157:H7 str. Sakai DNA, complete genome	1155545	1155550	AAAAAA
NC_002695.2 Escherichia coli O157:H7 str. Sakai DNA, complete genome	1156279	1156284	CCCCCC
NC_002695.2 Escherichia coli O157:H7 str. Sakai DNA, complete genome	1157830	1157835	AAAAAA
NC_002695.2 Escherichia coli O157:H7 str. Sakai DNA, complete genome	1158950	1158955	TTTTTT
NC_002695.2 Escherichia coli O157:H7 str. Sakai DNA, complete genome	1159204	1159211	AAAAAAAA
NC_002695.2 Escherichia coli O157:H7 str. Sakai DNA, complete genome	1160179	1160184	AAAAAA
NC_002695.2 Escherichia coli O157:H7 str. Sakai DNA, complete genome	1162068	1162073	GGGGGG
NC_002695.2 Escherichia coli O157:H7 str. Sakai DNA, complete genome	1162291	1162296	TTTTTT
NC_002695.2 Escherichia coli O157:H7 str. Sakai DNA, complete genome	1162298	1162303	TTTTTT
NC_002695.2 Escherichia coli O157:H7 str. Sakai DNA, complete genome	1162872	1162877	AAAAAA
NC_002695.2 Escherichia coli O157:H7 str. Sakai DNA, complete genome	1163079	1163084	AAAAAA
NC_002695.2 Escherichia coli O157:H7 str. Sakai DNA, complete genome	1163119	1163124	TTTTTT
NC_002695.2 Escherichia coli O157:H7 str. Sakai DNA, complete genome	1163782	1163787	TTTTTT
NC_002695.2 Escherichia coli O157:H7 str. Sakai DNA, complete genome	1163956	1163962	TTTTTTT
NC_002695.2 Escherichia coli O157:H7 str. Sakai DNA, complete genome	1164383	1164388	TTTTTT
NC_002695.2 Escherichia coli O157:H7 str. Sakai DNA, complete genome	1164486	1164491	TTTTTT
NC_002695.2 Escherichia coli O157:H7 str. Sakai DNA, complete genome	1165241	1165246	TTTTTT
NC_002695.2 Escherichia coli O157:H7 str. Sakai DNA, complete genome	1165726	1165731	AAAAAA
NC_002695.2 Escherichia coli O157:H7 str. Sakai DNA, complete genome	1166612	1166618	TTTTTTT
NC_002695.2 Escherichia coli O157:H7 str. Sakai DNA, complete genome	1166636	1166642	TTTTTTT
NC_002695.2 Escherichia coli O157:H7 str. Sakai DNA, complete genome	1167370	1167375	AAAAAA
NC_002695.2 Escherichia coli O157:H7 str. Sakai DNA, complete genome	1167415	1167421	AAAAAAA
NC_002695.2 Escherichia coli O157:H7 str. Sakai DNA, complete genome	1167976	1167981	TTTTTT
NC_002695.2 Escherichia coli O157:H7 str. Sakai DNA, complete genome	1168019	1168024	TTTTTT
NC_002695.2 Escherichia coli O157:H7 str. Sakai DNA, complete genome	1168048	1168053	TTTTTT
NC_002695.2 Escherichia coli O157:H7 str. Sakai DNA, complete genome	1168405	1168410	AAAAAA
NC_002695.2 Escherichia coli O157:H7 str. Sakai DNA, complete genome	1168428	1168433	TTTTTT
NC_002695.2 Escherichia coli O157:H7 str. Sakai DNA, complete genome	1168491	1168496	AAAAAA
NC_002695.2 Escherichia coli O157:H7 str. Sakai DNA, complete genome	1168938	1168944	AAAAAAA
NC_002695.2 Escherichia coli O157:H7 str. Sakai DNA, complete genome	1169179	1169184	AAAAAA
NC_002695.2 Escherichia coli O157:H7 str. Sakai DNA, complete genome	1169805	1169810	AAAAAA
NC_002695.2 Escherichia coli O157:H7 str. Sakai DNA, complete genome	1170434	1170441	AAAAAAAA
NC_002695.2 Escherichia coli O157:H7 str. Sakai DNA, complete genome	1170860	1170865	TTTTTT
NC_002695.2 Escherichia coli O157:H7 str. Sakai DNA, complete genome	1171158	1171163	AAAAAA
NC_002695.2 Escherichia coli O157:H7 str. Sakai DNA, complete genome	1171793	1171798	AAAAAA
NC_002695.2 Escherichia coli O157:H7 str. Sakai DNA, complete genome	1172577	1172582	AAAAAA
NC_002695.2 Escherichia coli O157:H7 str. Sakai DNA, complete genome	1172777	1172782	AAAAAA
NC_002695.2 Escherichia coli O157:H7 str. Sakai DNA, complete genome	1173173	1173178	AAAAAA
NC_002695.2 Escherichia coli O157:H7 str. Sakai DNA, complete genome	1173621	1173626	TTTTTT
NC_002695.2 Escherichia coli O157:H7 str. Sakai DNA, complete genome	1173978	1173985	TTTTTTTT
NC_002695.2 Escherichia coli O157:H7 str. Sakai DNA, complete genome	1173990	1173995	TTTTTT
NC_002695.2 Escherichia coli O157:H7 str. Sakai DNA, complete genome	1174137	1174142	AAAAAA
NC_002695.2 Escherichia coli O157:H7 str. Sakai DNA, complete genome	1174934	1174939	TTTTTT
NC_002695.2 Escherichia coli O157:H7 str. Sakai DNA, complete genome	1175180	1175185	AAAAAA
NC_002695.2 Escherichia coli O157:H7 str. Sakai DNA, complete genome	1175869	1175874	AAAAAA
NC_002695.2 Escherichia coli O157:H7 str. Sakai DNA, complete genome	1175948	1175953	AAAAAA
NC_002695.2 Escherichia coli O157:H7 str. Sakai DNA, complete genome	1176749	1176754	GGGGGG
NC_002695.2 Escherichia coli O157:H7 str. Sakai DNA, complete genome	1177139	1177144	TTTTTT
NC_002695.2 Escherichia coli O157:H7 str. Sakai DNA, complete genome	1177361	1177366	TTTTTT
NC_002695.2 Escherichia coli O157:H7 str. Sakai DNA, complete genome	1177380	1177387	TTTTTTTT
NC_002695.2 Escherichia coli O157:H7 str. Sakai DNA, complete genome	1177619	1177624	AAAAAA
NC_002695.2 Escherichia coli O157:H7 str. Sakai DNA, complete genome	1177656	1177661	GGGGGG
NC_002695.2 Escherichia coli O157:H7 str. Sakai DNA, complete genome	1177701	1177708	TTTTTTTT
NC_002695.2 Escherichia coli O157:H7 str. Sakai DNA, complete genome	1177772	1177777	TTTTTT
NC_002695.2 Escherichia coli O157:H7 str. Sakai DNA, complete genome	1178057	1178062	TTTTTT
NC_002695.2 Escherichia coli O157:H7 str. Sakai DNA, complete genome	1178148	1178153	AAAAAA
NC_002695.2 Escherichia coli O157:H7 str. Sakai DNA, complete genome	1178214	1178219	TTTTTT
NC_002695.2 Escherichia coli O157:H7 str. Sakai DNA, complete genome	1178544	1178549	TTTTTT
NC_002695.2 Escherichia coli O157:H7 str. Sakai DNA, complete genome	1179408	1179413	TTTTTT
NC_002695.2 Escherichia coli O157:H7 str. Sakai DNA, complete genome	1179701	1179708	TTTTTTTT
NC_002695.2 Escherichia coli O157:H7 str. Sakai DNA, complete genome	1179936	1179942	AAAAAAA
NC_002695.2 Escherichia coli O157:H7 str. Sakai DNA, complete genome	1180620	1180625	AAAAAA
NC_002695.2 Escherichia coli O157:H7 str. Sakai DNA, complete genome	1181942	1181947	AAAAAA
NC_002695.2 Escherichia coli O157:H7 str. Sakai DNA, complete genome	1182010	1182016	AAAAAAA
NC_002695.2 Escherichia coli O157:H7 str. Sakai DNA, complete genome	1182502	1182507	AAAAAA
NC_002695.2 Escherichia coli O157:H7 str. Sakai DNA, complete genome	1183361	1183366	TTTTTT
NC_002695.2 Escherichia coli O157:H7 str. Sakai DNA, complete genome	1183371	1183377	TTTTTTT
NC_002695.2 Escherichia coli O157:H7 str. Sakai DNA, complete genome	1183641	1183646	TTTTTT
NC_002695.2 Escherichia coli O157:H7 str. Sakai DNA, complete genome	1183744	1183749	AAAAAA
NC_002695.2 Escherichia coli O157:H7 str. Sakai DNA, complete genome	1183781	1183788	AAAAAAAA
NC_002695.2 Escherichia coli O157:H7 str. Sakai DNA, complete genome	1183826	1183831	TTTTTT
NC_002695.2 Escherichia coli O157:H7 str. Sakai DNA, complete genome	1183851	1183856	AAAAAA
NC_002695.2 Escherichia coli O157:H7 str. Sakai DNA, complete genome	1184493	1184498	TTTTTT
NC_002695.2 Escherichia coli O157:H7 str. Sakai DNA, complete genome	1185469	1185474	TTTTTT
NC_002695.2 Escherichia coli O157:H7 str. Sakai DNA, complete genome	1185870	1185875	AAAAAA
NC_002695.2 Escherichia coli O157:H7 str. Sakai DNA, complete genome	1186114	1186119	TTTTTT
NC_002695.2 Escherichia coli O157:H7 str. Sakai DNA, complete genome	1186366	1186371	TTTTTT
NC_002695.2 Escherichia coli O157:H7 str. Sakai DNA, complete genome	1186426	1186431	AAAAAA
NC_002695.2 Escherichia coli O157:H7 str. Sakai DNA, complete genome	1186667	1186673	TTTTTTT
NC_002695.2 Escherichia coli O157:H7 str. Sakai DNA, complete genome	1187052	1187057	AAAAAA
NC_002695.2 Escherichia coli O157:H7 str. Sakai DNA, complete genome	1187383	1187388	AAAAAA
NC_002695.2 Escherichia coli O157:H7 str. Sakai DNA, complete genome	1189829	1189834	AAAAAA
NC_002695.2 Escherichia coli O157:H7 str. Sakai DNA, complete genome	1190313	1190321	GGGGGGGGG
NC_002695.2 Escherichia coli O157:H7 str. Sakai DNA, complete genome	1191391	1191396	AAAAAA
NC_002695.2 Escherichia coli O157:H7 str. Sakai DNA, complete genome	1191451	1191456	GGGGGG
NC_002695.2 Escherichia coli O157:H7 str. Sakai DNA, complete genome	1191486	1191492	AAAAAAA
NC_002695.2 Escherichia coli O157:H7 str. Sakai DNA, complete genome	1191707	1191712	TTTTTT
NC_002695.2 Escherichia coli O157:H7 str. Sakai DNA, complete genome	1194022	1194027	GGGGGG
NC_002695.2 Escherichia coli O157:H7 str. Sakai DNA, complete genome	1197304	1197310	TTTTTTT
NC_002695.2 Escherichia coli O157:H7 str. Sakai DNA, complete genome	1198559	1198564	AAAAAA
NC_002695.2 Escherichia coli O157:H7 str. Sakai DNA, complete genome	1199791	1199796	GGGGGG
NC_002695.2 Escherichia coli O157:H7 str. Sakai DNA, complete genome	1200563	1200568	TTTTTT
NC_002695.2 Escherichia coli O157:H7 str. Sakai DNA, complete genome	1201454	1201459	GGGGGG
NC_002695.2 Escherichia coli O157:H7 str. Sakai DNA, complete genome	1202492	1202497	AAAAAA
NC_002695.2 Escherichia coli O157:H7 str. Sakai DNA, complete genome	1205790	1205795	AAAAAA
NC_002695.2 Escherichia coli O157:H7 str. Sakai DNA, complete genome	1206025	1206030	AAAAAA
NC_002695.2 Escherichia coli O157:H7 str. Sakai DNA, complete genome	1206849	1206854	TTTTTT
NC_002695.2 Escherichia coli O157:H7 str. Sakai DNA, complete genome	1207526	1207531	TTTTTT
NC_002695.2 Escherichia coli O157:H7 str. Sakai DNA, complete genome	1208756	1208763	TTTTTTTT
NC_002695.2 Escherichia coli O157:H7 str. Sakai DNA, complete genome	1208869	1208876	AAAAAAAA
NC_002695.2 Escherichia coli O157:H7 str. Sakai DNA, complete genome	1209162	1209167	TTTTTT
NC_002695.2 Escherichia coli O157:H7 str. Sakai DNA, complete genome	1210045	1210051	TTTTTTT
NC_002695.2 Escherichia coli O157:H7 str. Sakai DNA, complete genome	1210108	1210113	TTTTTT
NC_002695.2 Escherichia coli O157:H7 str. Sakai DNA, complete genome	1210259	1210265	AAAAAAA
NC_002695.2 Escherichia coli O157:H7 str. Sakai DNA, complete genome	1210605	1210610	AAAAAA
NC_002695.2 Escherichia coli O157:H7 str. Sakai DNA, complete genome	1210846	1210851	AAAAAA
NC_002695.2 Escherichia coli O157:H7 str. Sakai DNA, complete genome	1216022	1216027	TTTTTT
NC_002695.2 Escherichia coli O157:H7 str. Sakai DNA, complete genome	1217090	1217096	TTTTTTT
NC_002695.2 Escherichia coli O157:H7 str. Sakai DNA, complete genome	1221189	1221194	AAAAAA
NC_002695.2 Escherichia coli O157:H7 str. Sakai DNA, complete genome	1222212	1222217	TTTTTT
NC_002695.2 Escherichia coli O157:H7 str. Sakai DNA, complete genome	1228629	1228635	AAAAAAA
NC_002695.2 Escherichia coli O157:H7 str. Sakai DNA, complete genome	1230283	1230288	TTTTTT
NC_002695.2 Escherichia coli O157:H7 str. Sakai DNA, complete genome	1230391	1230396	TTTTTT
NC_002695.2 Escherichia coli O157:H7 str. Sakai DNA, complete genome	1230409	1230416	TTTTTTTT
NC_002695.2 Escherichia coli O157:H7 str. Sakai DNA, complete genome	1230580	1230585	AAAAAA
NC_002695.2 Escherichia coli O157:H7 str. Sakai DNA, complete genome	1230620	1230625	AAAAAA
NC_002695.2 Escherichia coli O157:H7 str. Sakai DNA, complete genome	1230686	1230691	AAAAAA
NC_002695.2 Escherichia coli O157:H7 str. Sakai DNA, complete genome	1230940	1230945	TTTTTT
NC_002695.2 Escherichia coli O157:H7 str. Sakai DNA, complete genome	1231079	1231084	TTTTTT
NC_002695.2 Escherichia coli O157:H7 str. Sakai DNA, complete genome	1231363	1231369	AAAAAAA
NC_002695.2 Escherichia coli O157:H7 str. Sakai DNA, complete genome	1231842	1231848	TTTTTTT
NC_002695.2 Escherichia coli O157:H7 str. Sakai DNA, complete genome	1232006	1232011	GGGGGG
NC_002695.2 Escherichia coli O157:H7 str. Sakai DNA, complete genome	1236106	1236111	TTTTTT
NC_002695.2 Escherichia coli O157:H7 str. Sakai DNA, complete genome	1237926	1237931	GGGGGG
NC_002695.2 Escherichia coli O157:H7 str. Sakai DNA, complete genome	1240757	1240762	AAAAAA
NC_002695.2 Escherichia coli O157:H7 str. Sakai DNA, complete genome	1241487	1241492	TTTTTT
NC_002695.2 Escherichia coli O157:H7 str. Sakai DNA, complete genome	1242597	1242602	AAAAAA
NC_002695.2 Escherichia coli O157:H7 str. Sakai DNA, complete genome	1242611	1242617	AAAAAAA
NC_002695.2 Escherichia coli O157:H7 str. Sakai DNA, complete genome	1243408	1243413	TTTTTT
NC_002695.2 Escherichia coli O157:H7 str. Sakai DNA, complete genome	1243414	1243420	AAAAAAA
NC_002695.2 Escherichia coli O157:H7 str. Sakai DNA, complete genome	1243448	1243453	AAAAAA
NC_002695.2 Escherichia coli O157:H7 str. Sakai DNA, complete genome	1243765	1243770	TTTTTT
NC_002695.2 Escherichia coli O157:H7 str. Sakai DNA, complete genome	1243833	1243838	TTTTTT
NC_002695.2 Escherichia coli O157:H7 str. Sakai DNA, complete genome	1244022	1244027	AAAAAA
NC_002695.2 Escherichia coli O157:H7 str. Sakai DNA, complete genome	1244498	1244503	AAAAAA
NC_002695.2 Escherichia coli O157:H7 str. Sakai DNA, complete genome	1244633	1244638	AAAAAA
NC_002695.2 Escherichia coli O157:H7 str. Sakai DNA, complete genome	1245394	1245399	AAAAAA
NC_002695.2 Escherichia coli O157:H7 str. Sakai DNA, complete genome	1245475	1245480	TTTTTT
NC_002695.2 Escherichia coli O157:H7 str. Sakai DNA, complete genome	1247253	1247259	TTTTTTT
NC_002695.2 Escherichia coli O157:H7 str. Sakai DNA, complete genome	1247852	1247857	AAAAAA
NC_002695.2 Escherichia coli O157:H7 str. Sakai DNA, complete genome	1248877	1248882	TTTTTT
NC_002695.2 Escherichia coli O157:H7 str. Sakai DNA, complete genome	1251303	1251308	AAAAAA
NC_002695.2 Escherichia coli O157:H7 str. Sakai DNA, complete genome	1251496	1251501	TTTTTT
NC_002695.2 Escherichia coli O157:H7 str. Sakai DNA, complete genome	1252034	1252039	TTTTTT
NC_002695.2 Escherichia coli O157:H7 str. Sakai DNA, complete genome	1253566	1253571	TTTTTT
NC_002695.2 Escherichia coli O157:H7 str. Sakai DNA, complete genome	1253865	1253870	TTTTTT
NC_002695.2 Escherichia coli O157:H7 str. Sakai DNA, complete genome	1253963	1253968	TTTTTT
NC_002695.2 Escherichia coli O157:H7 str. Sakai DNA, complete genome	1254520	1254525	TTTTTT
NC_002695.2 Escherichia coli O157:H7 str. Sakai DNA, complete genome	1254558	1254563	AAAAAA
NC_002695.2 Escherichia coli O157:H7 str. Sakai DNA, complete genome	1255545	1255551	TTTTTTT
NC_002695.2 Escherichia coli O157:H7 str. Sakai DNA, complete genome	1255578	1255583	TTTTTT
NC_002695.2 Escherichia coli O157:H7 str. Sakai DNA, complete genome	1255684	1255690	TTTTTTT
NC_002695.2 Escherichia coli O157:H7 str. Sakai DNA, complete genome	1255898	1255903	AAAAAA
NC_002695.2 Escherichia coli O157:H7 str. Sakai DNA, complete genome	1256452	1256457	TTTTTT
NC_002695.2 Escherichia coli O157:H7 str. Sakai DNA, complete genome	1256656	1256661	AAAAAA
NC_002695.2 Escherichia coli O157:H7 str. Sakai DNA, complete genome	1256868	1256873	TTTTTT
NC_002695.2 Escherichia coli O157:H7 str. Sakai DNA, complete genome	1257360	1257365	TTTTTT
NC_002695.2 Escherichia coli O157:H7 str. Sakai DNA, complete genome	1257446	1257451	AAAAAA
NC_002695.2 Escherichia coli O157:H7 str. Sakai DNA, complete genome	1257468	1257473	TTTTTT
NC_002695.2 Escherichia coli O157:H7 str. Sakai DNA, complete genome	1257794	1257800	TTTTTTT
NC_002695.2 Escherichia coli O157:H7 str. Sakai DNA, complete genome	1258425	1258430	AAAAAA
NC_002695.2 Escherichia coli O157:H7 str. Sakai DNA, complete genome	1258956	1258961	AAAAAA
NC_002695.2 Escherichia coli O157:H7 str. Sakai DNA, complete genome	1259214	1259219	AAAAAA
NC_002695.2 Escherichia coli O157:H7 str. Sakai DNA, complete genome	1260344	1260349	TTTTTT
NC_002695.2 Escherichia coli O157:H7 str. Sakai DNA, complete genome	1260981	1260986	AAAAAA
NC_002695.2 Escherichia coli O157:H7 str. Sakai DNA, complete genome	1262085	1262090	GGGGGG
NC_002695.2 Escherichia coli O157:H7 str. Sakai DNA, complete genome	1262391	1262396	AAAAAA
NC_002695.2 Escherichia coli O157:H7 str. Sakai DNA, complete genome	1263402	1263407	TTTTTT
NC_002695.2 Escherichia coli O157:H7 str. Sakai DNA, complete genome	1264339	1264344	TTTTTT
NC_002695.2 Escherichia coli O157:H7 str. Sakai DNA, complete genome	1264526	1264531	AAAAAA
NC_002695.2 Escherichia coli O157:H7 str. Sakai DNA, complete genome	1265920	1265925	GGGGGG
NC_002695.2 Escherichia coli O157:H7 str. Sakai DNA, complete genome	1266302	1266307	AAAAAA
NC_002695.2 Escherichia coli O157:H7 str. Sakai DNA, complete genome	1266387	1266393	TTTTTTT
NC_002695.2 Escherichia coli O157:H7 str. Sakai DNA, complete genome	1266597	1266602	TTTTTT
NC_002695.2 Escherichia coli O157:H7 str. Sakai DNA, complete genome	1267048	1267053	TTTTTT
NC_002695.2 Escherichia coli O157:H7 str. Sakai DNA, complete genome	1268440	1268446	AAAAAAA
NC_002695.2 Escherichia coli O157:H7 str. Sakai DNA, complete genome	1268628	1268633	AAAAAA
NC_002695.2 Escherichia coli O157:H7 str. Sakai DNA, complete genome	1269338	1269343	AAAAAA
NC_002695.2 Escherichia coli O157:H7 str. Sakai DNA, complete genome	1270307	1270312	GGGGGG
NC_002695.2 Escherichia coli O157:H7 str. Sakai DNA, complete genome	1270424	1270429	GGGGGG
NC_002695.2 Escherichia coli O157:H7 str. Sakai DNA, complete genome	1271435	1271440	TTTTTT
NC_002695.2 Escherichia coli O157:H7 str. Sakai DNA, complete genome	1272087	1272093	AAAAAAA
NC_002695.2 Escherichia coli O157:H7 str. Sakai DNA, complete genome	1272140	1272145	AAAAAA
NC_002695.2 Escherichia coli O157:H7 str. Sakai DNA, complete genome	1272802	1272807	AAAAAA
NC_002695.2 Escherichia coli O157:H7 str. Sakai DNA, complete genome	1274650	1274655	AAAAAA
NC_002695.2 Escherichia coli O157:H7 str. Sakai DNA, complete genome	1275316	1275322	TTTTTTT
NC_002695.2 Escherichia coli O157:H7 str. Sakai DNA, complete genome	1275973	1275978	AAAAAA
NC_002695.2 Escherichia coli O157:H7 str. Sakai DNA, complete genome	1275984	1275990	AAAAAAA
NC_002695.2 Escherichia coli O157:H7 str. Sakai DNA, complete genome	1277308	1277313	AAAAAA
NC_002695.2 Escherichia coli O157:H7 str. Sakai DNA, complete genome	1279441	1279446	AAAAAA
NC_002695.2 Escherichia coli O157:H7 str. Sakai DNA, complete genome	1279721	1279726	AAAAAA
NC_002695.2 Escherichia coli O157:H7 str. Sakai DNA, complete genome	1280410	1280415	TTTTTT
NC_002695.2 Escherichia coli O157:H7 str. Sakai DNA, complete genome	1280572	1280577	AAAAAA
NC_002695.2 Escherichia coli O157:H7 str. Sakai DNA, complete genome	1280950	1280955	AAAAAA
NC_002695.2 Escherichia coli O157:H7 str. Sakai DNA, complete genome	1282082	1282088	AAAAAAA
NC_002695.2 Escherichia coli O157:H7 str. Sakai DNA, complete genome	1282130	1282135	TTTTTT
NC_002695.2 Escherichia coli O157:H7 str. Sakai DNA, complete genome	1282179	1282184	TTTTTT
NC_002695.2 Escherichia coli O157:H7 str. Sakai DNA, complete genome	1282694	1282700	AAAAAAA
NC_002695.2 Escherichia coli O157:H7 str. Sakai DNA, complete genome	1282775	1282780	TTTTTT
NC_002695.2 Escherichia coli O157:H7 str. Sakai DNA, complete genome	1283731	1283736	TTTTTT
NC_002695.2 Escherichia coli O157:H7 str. Sakai DNA, complete genome	1284898	1284903	AAAAAA
NC_002695.2 Escherichia coli O157:H7 str. Sakai DNA, complete genome	1285310	1285315	AAAAAA
NC_002695.2 Escherichia coli O157:H7 str. Sakai DNA, complete genome	1286762	1286768	TTTTTTT
NC_002695.2 Escherichia coli O157:H7 str. Sakai DNA, complete genome	1287186	1287193	GGGGGGGG
NC_002695.2 Escherichia coli O157:H7 str. Sakai DNA, complete genome	1287266	1287271	TTTTTT
NC_002695.2 Escherichia coli O157:H7 str. Sakai DNA, complete genome	1287575	1287580	AAAAAA
NC_002695.2 Escherichia coli O157:H7 str. Sakai DNA, complete genome	1288387	1288392	TTTTTT
NC_002695.2 Escherichia coli O157:H7 str. Sakai DNA, complete genome	1289096	1289102	GGGGGGG
NC_002695.2 Escherichia coli O157:H7 str. Sakai DNA, complete genome	1289136	1289141	TTTTTT
NC_002695.2 Escherichia coli O157:H7 str. Sakai DNA, complete genome	1289949	1289954	AAAAAA
NC_002695.2 Escherichia coli O157:H7 str. Sakai DNA, complete genome	1290162	1290168	AAAAAAA
NC_002695.2 Escherichia coli O157:H7 str. Sakai DNA, complete genome	1291051	1291057	TTTTTTT
NC_002695.2 Escherichia coli O157:H7 str. Sakai DNA, complete genome	1291087	1291092	TTTTTT
NC_002695.2 Escherichia coli O157:H7 str. Sakai DNA, complete genome	1292246	1292252	AAAAAAA
NC_002695.2 Escherichia coli O157:H7 str. Sakai DNA, complete genome	1292428	1292433	TTTTTT
NC_002695.2 Escherichia coli O157:H7 str. Sakai DNA, complete genome	1293287	1293292	TTTTTT
NC_002695.2 Escherichia coli O157:H7 str. Sakai DNA, complete genome	1295190	1295195	AAAAAA
NC_002695.2 Escherichia coli O157:H7 str. Sakai DNA, complete genome	1295874	1295879	GGGGGG
NC_002695.2 Escherichia coli O157:H7 str. Sakai DNA, complete genome	1296005	1296011	TTTTTTT
NC_002695.2 Escherichia coli O157:H7 str. Sakai DNA, complete genome	1296366	1296371	GGGGGG
NC_002695.2 Escherichia coli O157:H7 str. Sakai DNA, complete genome	1296686	1296691	AAAAAA
NC_002695.2 Escherichia coli O157:H7 str. Sakai DNA, complete genome	1296752	1296758	AAAAAAA
NC_002695.2 Escherichia coli O157:H7 str. Sakai DNA, complete genome	1298726	1298732	AAAAAAA
NC_002695.2 Escherichia coli O157:H7 str. Sakai DNA, complete genome	1298970	1298975	GGGGGG
NC_002695.2 Escherichia coli O157:H7 str. Sakai DNA, complete genome	1298983	1298989	AAAAAAA
NC_002695.2 Escherichia coli O157:H7 str. Sakai DNA, complete genome	1299333	1299338	AAAAAA
NC_002695.2 Escherichia coli O157:H7 str. Sakai DNA, complete genome	1301491	1301497	AAAAAAA
NC_002695.2 Escherichia coli O157:H7 str. Sakai DNA, complete genome	1303030	1303035	GGGGGG
NC_002695.2 Escherichia coli O157:H7 str. Sakai DNA, complete genome	1304384	1304389	AAAAAA
NC_002695.2 Escherichia coli O157:H7 str. Sakai DNA, complete genome	1304777	1304782	TTTTTT
NC_002695.2 Escherichia coli O157:H7 str. Sakai DNA, complete genome	1305135	1305140	TTTTTT
NC_002695.2 Escherichia coli O157:H7 str. Sakai DNA, complete genome	1306169	1306174	TTTTTT
NC_002695.2 Escherichia coli O157:H7 str. Sakai DNA, complete genome	1307310	1307315	TTTTTT
NC_002695.2 Escherichia coli O157:H7 str. Sakai DNA, complete genome	1307668	1307673	AAAAAA
NC_002695.2 Escherichia coli O157:H7 str. Sakai DNA, complete genome	1308112	1308117	TTTTTT
NC_002695.2 Escherichia coli O157:H7 str. Sakai DNA, complete genome	1308489	1308494	AAAAAA
NC_002695.2 Escherichia coli O157:H7 str. Sakai DNA, complete genome	1308739	1308744	AAAAAA
NC_002695.2 Escherichia coli O157:H7 str. Sakai DNA, complete genome	1309080	1309086	TTTTTTT
NC_002695.2 Escherichia coli O157:H7 str. Sakai DNA, complete genome	1309349	1309354	AAAAAA
NC_002695.2 Escherichia coli O157:H7 str. Sakai DNA, complete genome	1309415	1309421	TTTTTTT
NC_002695.2 Escherichia coli O157:H7 str. Sakai DNA, complete genome	1311441	1311447	AAAAAAA
NC_002695.2 Escherichia coli O157:H7 str. Sakai DNA, complete genome	1311686	1311691	TTTTTT
NC_002695.2 Escherichia coli O157:H7 str. Sakai DNA, complete genome	1312831	1312836	AAAAAA
NC_002695.2 Escherichia coli O157:H7 str. Sakai DNA, complete genome	1313202	1313207	AAAAAA
NC_002695.2 Escherichia coli O157:H7 str. Sakai DNA, complete genome	1313298	1313303	AAAAAA
NC_002695.2 Escherichia coli O157:H7 str. Sakai DNA, complete genome	1314417	1314422	AAAAAA
NC_002695.2 Escherichia coli O157:H7 str. Sakai DNA, complete genome	1315261	1315266	AAAAAA
NC_002695.2 Escherichia coli O157:H7 str. Sakai DNA, complete genome	1319426	1319432	TTTTTTT
NC_002695.2 Escherichia coli O157:H7 str. Sakai DNA, complete genome	1319730	1319735	AAAAAA
NC_002695.2 Escherichia coli O157:H7 str. Sakai DNA, complete genome	1319998	1320004	AAAAAAA
NC_002695.2 Escherichia coli O157:H7 str. Sakai DNA, complete genome	1320057	1320062	AAAAAA
NC_002695.2 Escherichia coli O157:H7 str. Sakai DNA, complete genome	1320250	1320255	TTTTTT
NC_002695.2 Escherichia coli O157:H7 str. Sakai DNA, complete genome	1321982	1321987	TTTTTT
NC_002695.2 Escherichia coli O157:H7 str. Sakai DNA, complete genome	1322071	1322076	TTTTTT
NC_002695.2 Escherichia coli O157:H7 str. Sakai DNA, complete genome	1323502	1323510	TTTTTTTTT
NC_002695.2 Escherichia coli O157:H7 str. Sakai DNA, complete genome	1323639	1323644	TTTTTT
NC_002695.2 Escherichia coli O157:H7 str. Sakai DNA, complete genome	1323791	1323796	AAAAAA
NC_002695.2 Escherichia coli O157:H7 str. Sakai DNA, complete genome	1324089	1324094	AAAAAA
NC_002695.2 Escherichia coli O157:H7 str. Sakai DNA, complete genome	1324154	1324159	AAAAAA
NC_002695.2 Escherichia coli O157:H7 str. Sakai DNA, complete genome	1324293	1324298	TTTTTT
NC_002695.2 Escherichia coli O157:H7 str. Sakai DNA, complete genome	1324818	1324823	TTTTTT
NC_002695.2 Escherichia coli O157:H7 str. Sakai DNA, complete genome	1324986	1324991	TTTTTT
NC_002695.2 Escherichia coli O157:H7 str. Sakai DNA, complete genome	1326576	1326581	AAAAAA
NC_002695.2 Escherichia coli O157:H7 str. Sakai DNA, complete genome	1327617	1327622	AAAAAA
NC_002695.2 Escherichia coli O157:H7 str. Sakai DNA, complete genome	1327675	1327681	TTTTTTT
NC_002695.2 Escherichia coli O157:H7 str. Sakai DNA, complete genome	1327907	1327912	TTTTTT
NC_002695.2 Escherichia coli O157:H7 str. Sakai DNA, complete genome	1329279	1329284	TTTTTT
NC_002695.2 Escherichia coli O157:H7 str. Sakai DNA, complete genome	1329437	1329442	AAAAAA
NC_002695.2 Escherichia coli O157:H7 str. Sakai DNA, complete genome	1329968	1329973	AAAAAA
NC_002695.2 Escherichia coli O157:H7 str. Sakai DNA, complete genome	1330126	1330131	AAAAAA
NC_002695.2 Escherichia coli O157:H7 str. Sakai DNA, complete genome	1330820	1330825	AAAAAA
NC_002695.2 Escherichia coli O157:H7 str. Sakai DNA, complete genome	1330913	1330918	AAAAAA
NC_002695.2 Escherichia coli O157:H7 str. Sakai DNA, complete genome	1331679	1331684	TTTTTT
NC_002695.2 Escherichia coli O157:H7 str. Sakai DNA, complete genome	1332156	1332162	TTTTTTT
NC_002695.2 Escherichia coli O157:H7 str. Sakai DNA, complete genome	1334003	1334009	TTTTTTT
NC_002695.2 Escherichia coli O157:H7 str. Sakai DNA, complete genome	1334390	1334395	TTTTTT
NC_002695.2 Escherichia coli O157:H7 str. Sakai DNA, complete genome	1334466	1334471	TTTTTT
NC_002695.2 Escherichia coli O157:H7 str. Sakai DNA, complete genome	1336119	1336124	TTTTTT
NC_002695.2 Escherichia coli O157:H7 str. Sakai DNA, complete genome	1336407	1336413	AAAAAAA
NC_002695.2 Escherichia coli O157:H7 str. Sakai DNA, complete genome	1336434	1336439	TTTTTT
NC_002695.2 Escherichia coli O157:H7 str. Sakai DNA, complete genome	1336446	1336452	GGGGGGG
NC_002695.2 Escherichia coli O157:H7 str. Sakai DNA, complete genome	1336853	1336859	TTTTTTT
NC_002695.2 Escherichia coli O157:H7 str. Sakai DNA, complete genome	1336890	1336896	AAAAAAA
NC_002695.2 Escherichia coli O157:H7 str. Sakai DNA, complete genome	1336935	1336940	AAAAAA
NC_002695.2 Escherichia coli O157:H7 str. Sakai DNA, complete genome	1337533	1337539	AAAAAAA
NC_002695.2 Escherichia coli O157:H7 str. Sakai DNA, complete genome	1337830	1337836	AAAAAAA
NC_002695.2 Escherichia coli O157:H7 str. Sakai DNA, complete genome	1338117	1338123	AAAAAAA
NC_002695.2 Escherichia coli O157:H7 str. Sakai DNA, complete genome	1338612	1338617	AAAAAA
NC_002695.2 Escherichia coli O157:H7 str. Sakai DNA, complete genome	1339059	1339064	TTTTTT
NC_002695.2 Escherichia coli O157:H7 str. Sakai DNA, complete genome	1339243	1339248	AAAAAA
NC_002695.2 Escherichia coli O157:H7 str. Sakai DNA, complete genome	1339301	1339306	TTTTTT
NC_002695.2 Escherichia coli O157:H7 str. Sakai DNA, complete genome	1339387	1339392	TTTTTT
NC_002695.2 Escherichia coli O157:H7 str. Sakai DNA, complete genome	1339896	1339903	TTTTTTTT
NC_002695.2 Escherichia coli O157:H7 str. Sakai DNA, complete genome	1339937	1339942	AAAAAA
NC_002695.2 Escherichia coli O157:H7 str. Sakai DNA, complete genome	1339975	1339981	AAAAAAA
NC_002695.2 Escherichia coli O157:H7 str. Sakai DNA, complete genome	1340943	1340949	TTTTTTT
NC_002695.2 Escherichia coli O157:H7 str. Sakai DNA, complete genome	1341059	1341065	TTTTTTT
NC_002695.2 Escherichia coli O157:H7 str. Sakai DNA, complete genome	1341165	1341172	TTTTTTTT
NC_002695.2 Escherichia coli O157:H7 str. Sakai DNA, complete genome	1342550	1342555	GGGGGG
NC_002695.2 Escherichia coli O157:H7 str. Sakai DNA, complete genome	1343756	1343761	CCCCCC
NC_002695.2 Escherichia coli O157:H7 str. Sakai DNA, complete genome	1344062	1344067	AAAAAA
NC_002695.2 Escherichia coli O157:H7 str. Sakai DNA, complete genome	1344247	1344253	CCCCCCC
NC_002695.2 Escherichia coli O157:H7 str. Sakai DNA, complete genome	1346140	1346145	GGGGGG
NC_002695.2 Escherichia coli O157:H7 str. Sakai DNA, complete genome	1346655	1346660	AAAAAA
NC_002695.2 Escherichia coli O157:H7 str. Sakai DNA, complete genome	1346822	1346827	TTTTTT
NC_002695.2 Escherichia coli O157:H7 str. Sakai DNA, complete genome	1347253	1347258	TTTTTT
NC_002695.2 Escherichia coli O157:H7 str. Sakai DNA, complete genome	1347999	1348004	TTTTTT
NC_002695.2 Escherichia coli O157:H7 str. Sakai DNA, complete genome	1348213	1348218	TTTTTT
NC_002695.2 Escherichia coli O157:H7 str. Sakai DNA, complete genome	1348507	1348512	TTTTTT
NC_002695.2 Escherichia coli O157:H7 str. Sakai DNA, complete genome	1348571	1348578	AAAAAAAA
NC_002695.2 Escherichia coli O157:H7 str. Sakai DNA, complete genome	1348587	1348593	AAAAAAA
NC_002695.2 Escherichia coli O157:H7 str. Sakai DNA, complete genome	1349030	1349035	TTTTTT
NC_002695.2 Escherichia coli O157:H7 str. Sakai DNA, complete genome	1349093	1349098	AAAAAA
NC_002695.2 Escherichia coli O157:H7 str. Sakai DNA, complete genome	1349825	1349831	TTTTTTT
NC_002695.2 Escherichia coli O157:H7 str. Sakai DNA, complete genome	1349904	1349909	AAAAAA
NC_002695.2 Escherichia coli O157:H7 str. Sakai DNA, complete genome	1349926	1349932	TTTTTTT
NC_002695.2 Escherichia coli O157:H7 str. Sakai DNA, complete genome	1349962	1349967	TTTTTT
NC_002695.2 Escherichia coli O157:H7 str. Sakai DNA, complete genome	1350189	1350194	AAAAAA
NC_002695.2 Escherichia coli O157:H7 str. Sakai DNA, complete genome	1351663	1351668	GGGGGG
NC_002695.2 Escherichia coli O157:H7 str. Sakai DNA, complete genome	1351867	1351872	AAAAAA
NC_002695.2 Escherichia coli O157:H7 str. Sakai DNA, complete genome	1354068	1354074	AAAAAAA
NC_002695.2 Escherichia coli O157:H7 str. Sakai DNA, complete genome	1354110	1354117	AAAAAAAA
NC_002695.2 Escherichia coli O157:H7 str. Sakai DNA, complete genome	1354290	1354295	AAAAAA
NC_002695.2 Escherichia coli O157:H7 str. Sakai DNA, complete genome	1354416	1354421	AAAAAA
NC_002695.2 Escherichia coli O157:H7 str. Sakai DNA, complete genome	1354933	1354938	AAAAAA
NC_002695.2 Escherichia coli O157:H7 str. Sakai DNA, complete genome	1355124	1355129	AAAAAA
NC_002695.2 Escherichia coli O157:H7 str. Sakai DNA, complete genome	1355230	1355236	TTTTTTT
NC_002695.2 Escherichia coli O157:H7 str. Sakai DNA, complete genome	1355353	1355358	AAAAAA
NC_002695.2 Escherichia coli O157:H7 str. Sakai DNA, complete genome	1356025	1356030	AAAAAA
NC_002695.2 Escherichia coli O157:H7 str. Sakai DNA, complete genome	1356588	1356593	AAAAAA
NC_002695.2 Escherichia coli O157:H7 str. Sakai DNA, complete genome	1358082	1358087	GGGGGG
NC_002695.2 Escherichia coli O157:H7 str. Sakai DNA, complete genome	1358331	1358336	AAAAAA
NC_002695.2 Escherichia coli O157:H7 str. Sakai DNA, complete genome	1358785	1358790	AAAAAA
NC_002695.2 Escherichia coli O157:H7 str. Sakai DNA, complete genome	1358976	1358983	AAAAAAAA
NC_002695.2 Escherichia coli O157:H7 str. Sakai DNA, complete genome	1362718	1362723	TTTTTT
NC_002695.2 Escherichia coli O157:H7 str. Sakai DNA, complete genome	1363009	1363014	AAAAAA
NC_002695.2 Escherichia coli O157:H7 str. Sakai DNA, complete genome	1363924	1363929	TTTTTT
NC_002695.2 Escherichia coli O157:H7 str. Sakai DNA, complete genome	1363999	1364004	AAAAAA
NC_002695.2 Escherichia coli O157:H7 str. Sakai DNA, complete genome	1364520	1364525	TTTTTT
NC_002695.2 Escherichia coli O157:H7 str. Sakai DNA, complete genome	1365023	1365028	TTTTTT
NC_002695.2 Escherichia coli O157:H7 str. Sakai DNA, complete genome	1365147	1365153	TTTTTTT
NC_002695.2 Escherichia coli O157:H7 str. Sakai DNA, complete genome	1366069	1366074	GGGGGG
NC_002695.2 Escherichia coli O157:H7 str. Sakai DNA, complete genome	1369881	1369886	AAAAAA
NC_002695.2 Escherichia coli O157:H7 str. Sakai DNA, complete genome	1370070	1370075	TTTTTT
NC_002695.2 Escherichia coli O157:H7 str. Sakai DNA, complete genome	1370099	1370104	TTTTTT
NC_002695.2 Escherichia coli O157:H7 str. Sakai DNA, complete genome	1370113	1370119	TTTTTTT
NC_002695.2 Escherichia coli O157:H7 str. Sakai DNA, complete genome	1370166	1370171	TTTTTT
NC_002695.2 Escherichia coli O157:H7 str. Sakai DNA, complete genome	1370285	1370290	TTTTTT
NC_002695.2 Escherichia coli O157:H7 str. Sakai DNA, complete genome	1370321	1370326	TTTTTT
NC_002695.2 Escherichia coli O157:H7 str. Sakai DNA, complete genome	1370557	1370564	AAAAAAAA
NC_002695.2 Escherichia coli O157:H7 str. Sakai DNA, complete genome	1370920	1370925	AAAAAA
NC_002695.2 Escherichia coli O157:H7 str. Sakai DNA, complete genome	1372135	1372140	AAAAAA
NC_002695.2 Escherichia coli O157:H7 str. Sakai DNA, complete genome	1372359	1372366	TTTTTTTT
NC_002695.2 Escherichia coli O157:H7 str. Sakai DNA, complete genome	1372382	1372387	TTTTTT
NC_002695.2 Escherichia coli O157:H7 str. Sakai DNA, complete genome	1372415	1372420	GGGGGG
NC_002695.2 Escherichia coli O157:H7 str. Sakai DNA, complete genome	1373012	1373017	TTTTTT
NC_002695.2 Escherichia coli O157:H7 str. Sakai DNA, complete genome	1373342	1373347	TTTTTT
NC_002695.2 Escherichia coli O157:H7 str. Sakai DNA, complete genome	1374423	1374428	AAAAAA
NC_002695.2 Escherichia coli O157:H7 str. Sakai DNA, complete genome	1374898	1374904	TTTTTTT
NC_002695.2 Escherichia coli O157:H7 str. Sakai DNA, complete genome	1375003	1375008	TTTTTT
NC_002695.2 Escherichia coli O157:H7 str. Sakai DNA, complete genome	1375018	1375024	TTTTTTT
NC_002695.2 Escherichia coli O157:H7 str. Sakai DNA, complete genome	1375187	1375192	AAAAAA
NC_002695.2 Escherichia coli O157:H7 str. Sakai DNA, complete genome	1376108	1376114	AAAAAAA
NC_002695.2 Escherichia coli O157:H7 str. Sakai DNA, complete genome	1376587	1376593	GGGGGGG
NC_002695.2 Escherichia coli O157:H7 str. Sakai DNA, complete genome	1376766	1376772	AAAAAAA
NC_002695.2 Escherichia coli O157:H7 str. Sakai DNA, complete genome	1376967	1376972	GGGGGG
NC_002695.2 Escherichia coli O157:H7 str. Sakai DNA, complete genome	1377265	1377272	AAAAAAAA
NC_002695.2 Escherichia coli O157:H7 str. Sakai DNA, complete genome	1377764	1377769	AAAAAA
NC_002695.2 Escherichia coli O157:H7 str. Sakai DNA, complete genome	1378764	1378769	AAAAAA
NC_002695.2 Escherichia coli O157:H7 str. Sakai DNA, complete genome	1379496	1379501	TTTTTT
NC_002695.2 Escherichia coli O157:H7 str. Sakai DNA, complete genome	1379668	1379673	AAAAAA
NC_002695.2 Escherichia coli O157:H7 str. Sakai DNA, complete genome	1379687	1379692	GGGGGG
NC_002695.2 Escherichia coli O157:H7 str. Sakai DNA, complete genome	1379871	1379876	AAAAAA
NC_002695.2 Escherichia coli O157:H7 str. Sakai DNA, complete genome	1380981	1380988	AAAAAAAA
NC_002695.2 Escherichia coli O157:H7 str. Sakai DNA, complete genome	1381839	1381844	TTTTTT
NC_002695.2 Escherichia coli O157:H7 str. Sakai DNA, complete genome	1384772	1384777	AAAAAA
NC_002695.2 Escherichia coli O157:H7 str. Sakai DNA, complete genome	1385726	1385732	AAAAAAA
NC_002695.2 Escherichia coli O157:H7 str. Sakai DNA, complete genome	1387572	1387577	TTTTTT
NC_002695.2 Escherichia coli O157:H7 str. Sakai DNA, complete genome	1388270	1388276	TTTTTTT
NC_002695.2 Escherichia coli O157:H7 str. Sakai DNA, complete genome	1388674	1388679	TTTTTT
NC_002695.2 Escherichia coli O157:H7 str. Sakai DNA, complete genome	1389132	1389138	AAAAAAA
NC_002695.2 Escherichia coli O157:H7 str. Sakai DNA, complete genome	1389524	1389531	AAAAAAAA
NC_002695.2 Escherichia coli O157:H7 str. Sakai DNA, complete genome	1389737	1389743	TTTTTTT
NC_002695.2 Escherichia coli O157:H7 str. Sakai DNA, complete genome	1389938	1389943	AAAAAA
NC_002695.2 Escherichia coli O157:H7 str. Sakai DNA, complete genome	1390025	1390031	CCCCCCC
NC_002695.2 Escherichia coli O157:H7 str. Sakai DNA, complete genome	1390612	1390617	AAAAAA
NC_002695.2 Escherichia coli O157:H7 str. Sakai DNA, complete genome	1390946	1390953	TTTTTTTT
NC_002695.2 Escherichia coli O157:H7 str. Sakai DNA, complete genome	1394385	1394391	TTTTTTT
NC_002695.2 Escherichia coli O157:H7 str. Sakai DNA, complete genome	1395113	1395118	GGGGGG
NC_002695.2 Escherichia coli O157:H7 str. Sakai DNA, complete genome	1395864	1395870	TTTTTTT
NC_002695.2 Escherichia coli O157:H7 str. Sakai DNA, complete genome	1396222	1396227	TTTTTT
NC_002695.2 Escherichia coli O157:H7 str. Sakai DNA, complete genome	1396297	1396302	TTTTTT
NC_002695.2 Escherichia coli O157:H7 str. Sakai DNA, complete genome	1396371	1396376	TTTTTT
NC_002695.2 Escherichia coli O157:H7 str. Sakai DNA, complete genome	1396595	1396600	TTTTTT
NC_002695.2 Escherichia coli O157:H7 str. Sakai DNA, complete genome	1396985	1396990	AAAAAA
NC_002695.2 Escherichia coli O157:H7 str. Sakai DNA, complete genome	1397308	1397313	AAAAAA
NC_002695.2 Escherichia coli O157:H7 str. Sakai DNA, complete genome	1397527	1397532	AAAAAA
NC_002695.2 Escherichia coli O157:H7 str. Sakai DNA, complete genome	1397562	1397567	TTTTTT
NC_002695.2 Escherichia coli O157:H7 str. Sakai DNA, complete genome	1397607	1397613	AAAAAAA
NC_002695.2 Escherichia coli O157:H7 str. Sakai DNA, complete genome	1398061	1398066	TTTTTT
NC_002695.2 Escherichia coli O157:H7 str. Sakai DNA, complete genome	1398306	1398314	TTTTTTTTT
NC_002695.2 Escherichia coli O157:H7 str. Sakai DNA, complete genome	1398470	1398475	GGGGGG
NC_002695.2 Escherichia coli O157:H7 str. Sakai DNA, complete genome	1398525	1398530	TTTTTT
NC_002695.2 Escherichia coli O157:H7 str. Sakai DNA, complete genome	1398673	1398680	TTTTTTTT
NC_002695.2 Escherichia coli O157:H7 str. Sakai DNA, complete genome	1398739	1398744	AAAAAA
NC_002695.2 Escherichia coli O157:H7 str. Sakai DNA, complete genome	1398896	1398901	TTTTTT
NC_002695.2 Escherichia coli O157:H7 str. Sakai DNA, complete genome	1398962	1398968	AAAAAAA
NC_002695.2 Escherichia coli O157:H7 str. Sakai DNA, complete genome	1399682	1399687	TTTTTT
NC_002695.2 Escherichia coli O157:H7 str. Sakai DNA, complete genome	1399718	1399724	TTTTTTT
NC_002695.2 Escherichia coli O157:H7 str. Sakai DNA, complete genome	1399800	1399805	TTTTTT
NC_002695.2 Escherichia coli O157:H7 str. Sakai DNA, complete genome	1400933	1400938	TTTTTT
NC_002695.2 Escherichia coli O157:H7 str. Sakai DNA, complete genome	1402646	1402652	AAAAAAA
NC_002695.2 Escherichia coli O157:H7 str. Sakai DNA, complete genome	1402961	1402966	AAAAAA
NC_002695.2 Escherichia coli O157:H7 str. Sakai DNA, complete genome	1403406	1403411	AAAAAA
NC_002695.2 Escherichia coli O157:H7 str. Sakai DNA, complete genome	1404215	1404220	GGGGGG
NC_002695.2 Escherichia coli O157:H7 str. Sakai DNA, complete genome	1404317	1404322	TTTTTT
NC_002695.2 Escherichia coli O157:H7 str. Sakai DNA, complete genome	1404435	1404440	TTTTTT
NC_002695.2 Escherichia coli O157:H7 str. Sakai DNA, complete genome	1405303	1405308	TTTTTT
NC_002695.2 Escherichia coli O157:H7 str. Sakai DNA, complete genome	1405751	1405757	TTTTTTT
NC_002695.2 Escherichia coli O157:H7 str. Sakai DNA, complete genome	1406829	1406834	AAAAAA
NC_002695.2 Escherichia coli O157:H7 str. Sakai DNA, complete genome	1408308	1408313	CCCCCC
NC_002695.2 Escherichia coli O157:H7 str. Sakai DNA, complete genome	1409240	1409245	TTTTTT
NC_002695.2 Escherichia coli O157:H7 str. Sakai DNA, complete genome	1411437	1411443	CCCCCCC
NC_002695.2 Escherichia coli O157:H7 str. Sakai DNA, complete genome	1412234	1412240	TTTTTTT
NC_002695.2 Escherichia coli O157:H7 str. Sakai DNA, complete genome	1412316	1412323	TTTTTTTT
NC_002695.2 Escherichia coli O157:H7 str. Sakai DNA, complete genome	1412438	1412443	TTTTTT
NC_002695.2 Escherichia coli O157:H7 str. Sakai DNA, complete genome	1412735	1412740	AAAAAA
NC_002695.2 Escherichia coli O157:H7 str. Sakai DNA, complete genome	1413234	1413239	GGGGGG
NC_002695.2 Escherichia coli O157:H7 str. Sakai DNA, complete genome	1414481	1414486	AAAAAA
NC_002695.2 Escherichia coli O157:H7 str. Sakai DNA, complete genome	1415514	1415519	AAAAAA
NC_002695.2 Escherichia coli O157:H7 str. Sakai DNA, complete genome	1416920	1416925	AAAAAA
NC_002695.2 Escherichia coli O157:H7 str. Sakai DNA, complete genome	1417223	1417230	TTTTTTTT
NC_002695.2 Escherichia coli O157:H7 str. Sakai DNA, complete genome	1417268	1417275	GGGGGGGG
NC_002695.2 Escherichia coli O157:H7 str. Sakai DNA, complete genome	1419523	1419528	CCCCCC
NC_002695.2 Escherichia coli O157:H7 str. Sakai DNA, complete genome	1419778	1419783	CCCCCC
NC_002695.2 Escherichia coli O157:H7 str. Sakai DNA, complete genome	1420685	1420690	AAAAAA
NC_002695.2 Escherichia coli O157:H7 str. Sakai DNA, complete genome	1420781	1420786	AAAAAA
NC_002695.2 Escherichia coli O157:H7 str. Sakai DNA, complete genome	1421141	1421146	AAAAAA
NC_002695.2 Escherichia coli O157:H7 str. Sakai DNA, complete genome	1421448	1421453	AAAAAA
NC_002695.2 Escherichia coli O157:H7 str. Sakai DNA, complete genome	1421767	1421772	CCCCCC
NC_002695.2 Escherichia coli O157:H7 str. Sakai DNA, complete genome	1422612	1422618	TTTTTTT
NC_002695.2 Escherichia coli O157:H7 str. Sakai DNA, complete genome	1424068	1424074	TTTTTTT
NC_002695.2 Escherichia coli O157:H7 str. Sakai DNA, complete genome	1424932	1424937	AAAAAA
NC_002695.2 Escherichia coli O157:H7 str. Sakai DNA, complete genome	1425608	1425613	GGGGGG
NC_002695.2 Escherichia coli O157:H7 str. Sakai DNA, complete genome	1426146	1426151	AAAAAA
NC_002695.2 Escherichia coli O157:H7 str. Sakai DNA, complete genome	1426292	1426297	TTTTTT
NC_002695.2 Escherichia coli O157:H7 str. Sakai DNA, complete genome	1426515	1426521	AAAAAAA
NC_002695.2 Escherichia coli O157:H7 str. Sakai DNA, complete genome	1426544	1426550	TTTTTTT
NC_002695.2 Escherichia coli O157:H7 str. Sakai DNA, complete genome	1427399	1427404	AAAAAA
NC_002695.2 Escherichia coli O157:H7 str. Sakai DNA, complete genome	1428283	1428288	TTTTTT
NC_002695.2 Escherichia coli O157:H7 str. Sakai DNA, complete genome	1428640	1428645	TTTTTT
NC_002695.2 Escherichia coli O157:H7 str. Sakai DNA, complete genome	1428661	1428666	TTTTTT
NC_002695.2 Escherichia coli O157:H7 str. Sakai DNA, complete genome	1430349	1430354	CCCCCC
NC_002695.2 Escherichia coli O157:H7 str. Sakai DNA, complete genome	1431721	1431726	TTTTTT
NC_002695.2 Escherichia coli O157:H7 str. Sakai DNA, complete genome	1432971	1432976	TTTTTT
NC_002695.2 Escherichia coli O157:H7 str. Sakai DNA, complete genome	1433728	1433733	AAAAAA
NC_002695.2 Escherichia coli O157:H7 str. Sakai DNA, complete genome	1435138	1435143	TTTTTT
NC_002695.2 Escherichia coli O157:H7 str. Sakai DNA, complete genome	1435541	1435547	TTTTTTT
NC_002695.2 Escherichia coli O157:H7 str. Sakai DNA, complete genome	1435628	1435633	AAAAAA
NC_002695.2 Escherichia coli O157:H7 str. Sakai DNA, complete genome	1435746	1435751	TTTTTT
NC_002695.2 Escherichia coli O157:H7 str. Sakai DNA, complete genome	1435776	1435781	AAAAAA
NC_002695.2 Escherichia coli O157:H7 str. Sakai DNA, complete genome	1435944	1435950	AAAAAAA
NC_002695.2 Escherichia coli O157:H7 str. Sakai DNA, complete genome	1435997	1436002	AAAAAA
NC_002695.2 Escherichia coli O157:H7 str. Sakai DNA, complete genome	1437180	1437185	GGGGGG
NC_002695.2 Escherichia coli O157:H7 str. Sakai DNA, complete genome	1437452	1437457	AAAAAA
NC_002695.2 Escherichia coli O157:H7 str. Sakai DNA, complete genome	1437965	1437970	AAAAAA
NC_002695.2 Escherichia coli O157:H7 str. Sakai DNA, complete genome	1440850	1440855	GGGGGG
NC_002695.2 Escherichia coli O157:H7 str. Sakai DNA, complete genome	1441034	1441039	TTTTTT
NC_002695.2 Escherichia coli O157:H7 str. Sakai DNA, complete genome	1442734	1442741	GGGGGGGG
NC_002695.2 Escherichia coli O157:H7 str. Sakai DNA, complete genome	1442764	1442769	AAAAAA
NC_002695.2 Escherichia coli O157:H7 str. Sakai DNA, complete genome	1443025	1443030	TTTTTT
NC_002695.2 Escherichia coli O157:H7 str. Sakai DNA, complete genome	1443585	1443590	AAAAAA
NC_002695.2 Escherichia coli O157:H7 str. Sakai DNA, complete genome	1444260	1444265	TTTTTT
NC_002695.2 Escherichia coli O157:H7 str. Sakai DNA, complete genome	1444665	1444670	GGGGGG
NC_002695.2 Escherichia coli O157:H7 str. Sakai DNA, complete genome	1445109	1445114	GGGGGG
NC_002695.2 Escherichia coli O157:H7 str. Sakai DNA, complete genome	1448300	1448305	AAAAAA
NC_002695.2 Escherichia coli O157:H7 str. Sakai DNA, complete genome	1450798	1450803	AAAAAA
NC_002695.2 Escherichia coli O157:H7 str. Sakai DNA, complete genome	1456807	1456812	AAAAAA
NC_002695.2 Escherichia coli O157:H7 str. Sakai DNA, complete genome	1456855	1456861	GGGGGGG
NC_002695.2 Escherichia coli O157:H7 str. Sakai DNA, complete genome	1457002	1457007	TTTTTT
NC_002695.2 Escherichia coli O157:H7 str. Sakai DNA, complete genome	1457008	1457013	AAAAAA
NC_002695.2 Escherichia coli O157:H7 str. Sakai DNA, complete genome	1457068	1457073	TTTTTT
NC_002695.2 Escherichia coli O157:H7 str. Sakai DNA, complete genome	1461287	1461292	AAAAAA
NC_002695.2 Escherichia coli O157:H7 str. Sakai DNA, complete genome	1461425	1461430	TTTTTT
NC_002695.2 Escherichia coli O157:H7 str. Sakai DNA, complete genome	1461534	1461539	TTTTTT
NC_002695.2 Escherichia coli O157:H7 str. Sakai DNA, complete genome	1461563	1461568	AAAAAA
NC_002695.2 Escherichia coli O157:H7 str. Sakai DNA, complete genome	1461873	1461878	TTTTTT
NC_002695.2 Escherichia coli O157:H7 str. Sakai DNA, complete genome	1462153	1462158	AAAAAA
NC_002695.2 Escherichia coli O157:H7 str. Sakai DNA, complete genome	1462491	1462497	TTTTTTT
NC_002695.2 Escherichia coli O157:H7 str. Sakai DNA, complete genome	1462772	1462777	AAAAAA
NC_002695.2 Escherichia coli O157:H7 str. Sakai DNA, complete genome	1462814	1462819	AAAAAA
NC_002695.2 Escherichia coli O157:H7 str. Sakai DNA, complete genome	1462859	1462864	TTTTTT
NC_002695.2 Escherichia coli O157:H7 str. Sakai DNA, complete genome	1462885	1462890	TTTTTT
NC_002695.2 Escherichia coli O157:H7 str. Sakai DNA, complete genome	1462977	1462982	TTTTTT
NC_002695.2 Escherichia coli O157:H7 str. Sakai DNA, complete genome	1463020	1463025	TTTTTT
NC_002695.2 Escherichia coli O157:H7 str. Sakai DNA, complete genome	1463074	1463080	AAAAAAA
NC_002695.2 Escherichia coli O157:H7 str. Sakai DNA, complete genome	1463625	1463630	AAAAAA
NC_002695.2 Escherichia coli O157:H7 str. Sakai DNA, complete genome	1464224	1464231	TTTTTTTT
NC_002695.2 Escherichia coli O157:H7 str. Sakai DNA, complete genome	1464708	1464713	TTTTTT
NC_002695.2 Escherichia coli O157:H7 str. Sakai DNA, complete genome	1464739	1464744	TTTTTT
NC_002695.2 Escherichia coli O157:H7 str. Sakai DNA, complete genome	1466067	1466072	GGGGGG
NC_002695.2 Escherichia coli O157:H7 str. Sakai DNA, complete genome	1466116	1466121	TTTTTT
NC_002695.2 Escherichia coli O157:H7 str. Sakai DNA, complete genome	1466634	1466639	AAAAAA
NC_002695.2 Escherichia coli O157:H7 str. Sakai DNA, complete genome	1466979	1466984	AAAAAA
NC_002695.2 Escherichia coli O157:H7 str. Sakai DNA, complete genome	1467674	1467680	AAAAAAA
NC_002695.2 Escherichia coli O157:H7 str. Sakai DNA, complete genome	1467706	1467711	TTTTTT
NC_002695.2 Escherichia coli O157:H7 str. Sakai DNA, complete genome	1467979	1467984	TTTTTT
NC_002695.2 Escherichia coli O157:H7 str. Sakai DNA, complete genome	1467998	1468004	AAAAAAA
NC_002695.2 Escherichia coli O157:H7 str. Sakai DNA, complete genome	1469925	1469930	AAAAAA
NC_002695.2 Escherichia coli O157:H7 str. Sakai DNA, complete genome	1472838	1472844	TTTTTTT
NC_002695.2 Escherichia coli O157:H7 str. Sakai DNA, complete genome	1473302	1473307	AAAAAA
NC_002695.2 Escherichia coli O157:H7 str. Sakai DNA, complete genome	1473814	1473819	AAAAAA
NC_002695.2 Escherichia coli O157:H7 str. Sakai DNA, complete genome	1474164	1474169	TTTTTT
NC_002695.2 Escherichia coli O157:H7 str. Sakai DNA, complete genome	1475292	1475297	TTTTTT
NC_002695.2 Escherichia coli O157:H7 str. Sakai DNA, complete genome	1475913	1475918	TTTTTT
NC_002695.2 Escherichia coli O157:H7 str. Sakai DNA, complete genome	1476668	1476674	AAAAAAA
NC_002695.2 Escherichia coli O157:H7 str. Sakai DNA, complete genome	1477565	1477571	TTTTTTT
NC_002695.2 Escherichia coli O157:H7 str. Sakai DNA, complete genome	1477749	1477755	TTTTTTT
NC_002695.2 Escherichia coli O157:H7 str. Sakai DNA, complete genome	1477758	1477763	TTTTTT
NC_002695.2 Escherichia coli O157:H7 str. Sakai DNA, complete genome	1478794	1478800	TTTTTTT
NC_002695.2 Escherichia coli O157:H7 str. Sakai DNA, complete genome	1479284	1479289	TTTTTT
NC_002695.2 Escherichia coli O157:H7 str. Sakai DNA, complete genome	1479432	1479437	AAAAAA
NC_002695.2 Escherichia coli O157:H7 str. Sakai DNA, complete genome	1479868	1479874	TTTTTTT
NC_002695.2 Escherichia coli O157:H7 str. Sakai DNA, complete genome	1480227	1480233	TTTTTTT
NC_002695.2 Escherichia coli O157:H7 str. Sakai DNA, complete genome	1480348	1480353	GGGGGG
NC_002695.2 Escherichia coli O157:H7 str. Sakai DNA, complete genome	1480413	1480419	TTTTTTT
NC_002695.2 Escherichia coli O157:H7 str. Sakai DNA, complete genome	1480484	1480489	AAAAAA
NC_002695.2 Escherichia coli O157:H7 str. Sakai DNA, complete genome	1481496	1481501	TTTTTT
NC_002695.2 Escherichia coli O157:H7 str. Sakai DNA, complete genome	1482055	1482060	TTTTTT
NC_002695.2 Escherichia coli O157:H7 str. Sakai DNA, complete genome	1482177	1482182	TTTTTT
NC_002695.2 Escherichia coli O157:H7 str. Sakai DNA, complete genome	1482637	1482642	AAAAAA
NC_002695.2 Escherichia coli O157:H7 str. Sakai DNA, complete genome	1483388	1483393	GGGGGG
NC_002695.2 Escherichia coli O157:H7 str. Sakai DNA, complete genome	1484202	1484207	AAAAAA
NC_002695.2 Escherichia coli O157:H7 str. Sakai DNA, complete genome	1484693	1484699	TTTTTTT
NC_002695.2 Escherichia coli O157:H7 str. Sakai DNA, complete genome	1486094	1486099	AAAAAA
NC_002695.2 Escherichia coli O157:H7 str. Sakai DNA, complete genome	1486427	1486432	AAAAAA
NC_002695.2 Escherichia coli O157:H7 str. Sakai DNA, complete genome	1488977	1488982	TTTTTT
NC_002695.2 Escherichia coli O157:H7 str. Sakai DNA, complete genome	1490053	1490058	AAAAAA
NC_002695.2 Escherichia coli O157:H7 str. Sakai DNA, complete genome	1490450	1490455	AAAAAA
NC_002695.2 Escherichia coli O157:H7 str. Sakai DNA, complete genome	1492101	1492106	TTTTTT
NC_002695.2 Escherichia coli O157:H7 str. Sakai DNA, complete genome	1492396	1492401	AAAAAA
NC_002695.2 Escherichia coli O157:H7 str. Sakai DNA, complete genome	1494816	1494822	AAAAAAA
NC_002695.2 Escherichia coli O157:H7 str. Sakai DNA, complete genome	1495764	1495769	AAAAAA
NC_002695.2 Escherichia coli O157:H7 str. Sakai DNA, complete genome	1499555	1499560	AAAAAA
NC_002695.2 Escherichia coli O157:H7 str. Sakai DNA, complete genome	1500305	1500311	TTTTTTT
NC_002695.2 Escherichia coli O157:H7 str. Sakai DNA, complete genome	1500383	1500388	AAAAAA
NC_002695.2 Escherichia coli O157:H7 str. Sakai DNA, complete genome	1503027	1503032	TTTTTT
NC_002695.2 Escherichia coli O157:H7 str. Sakai DNA, complete genome	1504048	1504053	TTTTTT
NC_002695.2 Escherichia coli O157:H7 str. Sakai DNA, complete genome	1504337	1504342	AAAAAA
NC_002695.2 Escherichia coli O157:H7 str. Sakai DNA, complete genome	1504649	1504654	AAAAAA
NC_002695.2 Escherichia coli O157:H7 str. Sakai DNA, complete genome	1505241	1505246	AAAAAA
NC_002695.2 Escherichia coli O157:H7 str. Sakai DNA, complete genome	1505833	1505839	TTTTTTT
NC_002695.2 Escherichia coli O157:H7 str. Sakai DNA, complete genome	1507634	1507639	AAAAAA
NC_002695.2 Escherichia coli O157:H7 str. Sakai DNA, complete genome	1508062	1508067	AAAAAA
NC_002695.2 Escherichia coli O157:H7 str. Sakai DNA, complete genome	1508760	1508765	AAAAAA
NC_002695.2 Escherichia coli O157:H7 str. Sakai DNA, complete genome	1510117	1510122	AAAAAA
NC_002695.2 Escherichia coli O157:H7 str. Sakai DNA, complete genome	1510723	1510728	GGGGGG
NC_002695.2 Escherichia coli O157:H7 str. Sakai DNA, complete genome	1511150	1511155	TTTTTT
NC_002695.2 Escherichia coli O157:H7 str. Sakai DNA, complete genome	1511916	1511921	AAAAAA
NC_002695.2 Escherichia coli O157:H7 str. Sakai DNA, complete genome	1512458	1512463	TTTTTT
NC_002695.2 Escherichia coli O157:H7 str. Sakai DNA, complete genome	1513040	1513046	GGGGGGG
NC_002695.2 Escherichia coli O157:H7 str. Sakai DNA, complete genome	1513351	1513356	AAAAAA
NC_002695.2 Escherichia coli O157:H7 str. Sakai DNA, complete genome	1514354	1514360	AAAAAAA
NC_002695.2 Escherichia coli O157:H7 str. Sakai DNA, complete genome	1516816	1516822	TTTTTTT
NC_002695.2 Escherichia coli O157:H7 str. Sakai DNA, complete genome	1517045	1517050	CCCCCC
NC_002695.2 Escherichia coli O157:H7 str. Sakai DNA, complete genome	1517070	1517076	AAAAAAA
NC_002695.2 Escherichia coli O157:H7 str. Sakai DNA, complete genome	1518581	1518586	TTTTTT
NC_002695.2 Escherichia coli O157:H7 str. Sakai DNA, complete genome	1521008	1521013	TTTTTT
NC_002695.2 Escherichia coli O157:H7 str. Sakai DNA, complete genome	1525135	1525140	TTTTTT
NC_002695.2 Escherichia coli O157:H7 str. Sakai DNA, complete genome	1525348	1525354	AAAAAAA
NC_002695.2 Escherichia coli O157:H7 str. Sakai DNA, complete genome	1525426	1525431	AAAAAA
NC_002695.2 Escherichia coli O157:H7 str. Sakai DNA, complete genome	1527273	1527278	AAAAAA
NC_002695.2 Escherichia coli O157:H7 str. Sakai DNA, complete genome	1527453	1527459	TTTTTTT
NC_002695.2 Escherichia coli O157:H7 str. Sakai DNA, complete genome	1528064	1528071	TTTTTTTT
NC_002695.2 Escherichia coli O157:H7 str. Sakai DNA, complete genome	1528239	1528244	AAAAAA
NC_002695.2 Escherichia coli O157:H7 str. Sakai DNA, complete genome	1528629	1528634	TTTTTT
NC_002695.2 Escherichia coli O157:H7 str. Sakai DNA, complete genome	1528661	1528668	TTTTTTTT
NC_002695.2 Escherichia coli O157:H7 str. Sakai DNA, complete genome	1529455	1529460	TTTTTT
NC_002695.2 Escherichia coli O157:H7 str. Sakai DNA, complete genome	1529599	1529604	AAAAAA
NC_002695.2 Escherichia coli O157:H7 str. Sakai DNA, complete genome	1534244	1534250	AAAAAAA
NC_002695.2 Escherichia coli O157:H7 str. Sakai DNA, complete genome	1534447	1534452	TTTTTT
NC_002695.2 Escherichia coli O157:H7 str. Sakai DNA, complete genome	1535480	1535486	AAAAAAA
NC_002695.2 Escherichia coli O157:H7 str. Sakai DNA, complete genome	1538865	1538871	TTTTTTT
NC_002695.2 Escherichia coli O157:H7 str. Sakai DNA, complete genome	1539726	1539731	AAAAAA
NC_002695.2 Escherichia coli O157:H7 str. Sakai DNA, complete genome	1540207	1540212	TTTTTT
NC_002695.2 Escherichia coli O157:H7 str. Sakai DNA, complete genome	1540801	1540806	TTTTTT
NC_002695.2 Escherichia coli O157:H7 str. Sakai DNA, complete genome	1541660	1541665	TTTTTT
NC_002695.2 Escherichia coli O157:H7 str. Sakai DNA, complete genome	1541726	1541731	TTTTTT
NC_002695.2 Escherichia coli O157:H7 str. Sakai DNA, complete genome	1542279	1542284	TTTTTT
NC_002695.2 Escherichia coli O157:H7 str. Sakai DNA, complete genome	1542546	1542551	TTTTTT
NC_002695.2 Escherichia coli O157:H7 str. Sakai DNA, complete genome	1542735	1542740	TTTTTT
NC_002695.2 Escherichia coli O157:H7 str. Sakai DNA, complete genome	1542863	1542868	TTTTTT
NC_002695.2 Escherichia coli O157:H7 str. Sakai DNA, complete genome	1543000	1543005	TTTTTT
NC_002695.2 Escherichia coli O157:H7 str. Sakai DNA, complete genome	1543452	1543457	AAAAAA
NC_002695.2 Escherichia coli O157:H7 str. Sakai DNA, complete genome	1544103	1544108	TTTTTT
NC_002695.2 Escherichia coli O157:H7 str. Sakai DNA, complete genome	1544302	1544307	CCCCCC
NC_002695.2 Escherichia coli O157:H7 str. Sakai DNA, complete genome	1544969	1544974	TTTTTT
NC_002695.2 Escherichia coli O157:H7 str. Sakai DNA, complete genome	1545227	1545233	TTTTTTT
NC_002695.2 Escherichia coli O157:H7 str. Sakai DNA, complete genome	1545388	1545393	TTTTTT
NC_002695.2 Escherichia coli O157:H7 str. Sakai DNA, complete genome	1545409	1545414	AAAAAA
NC_002695.2 Escherichia coli O157:H7 str. Sakai DNA, complete genome	1545924	1545929	AAAAAA
NC_002695.2 Escherichia coli O157:H7 str. Sakai DNA, complete genome	1549165	1549170	AAAAAA
NC_002695.2 Escherichia coli O157:H7 str. Sakai DNA, complete genome	1550468	1550473	AAAAAA
NC_002695.2 Escherichia coli O157:H7 str. Sakai DNA, complete genome	1550742	1550747	TTTTTT
NC_002695.2 Escherichia coli O157:H7 str. Sakai DNA, complete genome	1550893	1550898	TTTTTT
NC_002695.2 Escherichia coli O157:H7 str. Sakai DNA, complete genome	1551557	1551562	TTTTTT
NC_002695.2 Escherichia coli O157:H7 str. Sakai DNA, complete genome	1551803	1551808	AAAAAA
NC_002695.2 Escherichia coli O157:H7 str. Sakai DNA, complete genome	1552492	1552497	AAAAAA
NC_002695.2 Escherichia coli O157:H7 str. Sakai DNA, complete genome	1552571	1552576	AAAAAA
NC_002695.2 Escherichia coli O157:H7 str. Sakai DNA, complete genome	1553343	1553348	AAAAAA
NC_002695.2 Escherichia coli O157:H7 str. Sakai DNA, complete genome	1553687	1553692	AAAAAA
NC_002695.2 Escherichia coli O157:H7 str. Sakai DNA, complete genome	1553713	1553719	AAAAAAA
NC_002695.2 Escherichia coli O157:H7 str. Sakai DNA, complete genome	1553828	1553833	AAAAAA
NC_002695.2 Escherichia coli O157:H7 str. Sakai DNA, complete genome	1554074	1554080	AAAAAAA
NC_002695.2 Escherichia coli O157:H7 str. Sakai DNA, complete genome	1554242	1554247	TTTTTT
NC_002695.2 Escherichia coli O157:H7 str. Sakai DNA, complete genome	1554267	1554273	TTTTTTT
NC_002695.2 Escherichia coli O157:H7 str. Sakai DNA, complete genome	1554862	1554867	GGGGGG
NC_002695.2 Escherichia coli O157:H7 str. Sakai DNA, complete genome	1554934	1554940	TTTTTTT
NC_002695.2 Escherichia coli O157:H7 str. Sakai DNA, complete genome	1555154	1555161	TTTTTTTT
NC_002695.2 Escherichia coli O157:H7 str. Sakai DNA, complete genome	1557191	1557197	AAAAAAA
NC_002695.2 Escherichia coli O157:H7 str. Sakai DNA, complete genome	1557276	1557281	TTTTTT
NC_002695.2 Escherichia coli O157:H7 str. Sakai DNA, complete genome	1557457	1557462	AAAAAA
NC_002695.2 Escherichia coli O157:H7 str. Sakai DNA, complete genome	1557702	1557707	GGGGGG
NC_002695.2 Escherichia coli O157:H7 str. Sakai DNA, complete genome	1557911	1557916	AAAAAA
NC_002695.2 Escherichia coli O157:H7 str. Sakai DNA, complete genome	1558124	1558129	AAAAAA
NC_002695.2 Escherichia coli O157:H7 str. Sakai DNA, complete genome	1560154	1560159	AAAAAA
NC_002695.2 Escherichia coli O157:H7 str. Sakai DNA, complete genome	1561239	1561246	TTTTTTTT
NC_002695.2 Escherichia coli O157:H7 str. Sakai DNA, complete genome	1561285	1561290	TTTTTT
NC_002695.2 Escherichia coli O157:H7 str. Sakai DNA, complete genome	1561676	1561681	GGGGGG
NC_002695.2 Escherichia coli O157:H7 str. Sakai DNA, complete genome	1561983	1561989	GGGGGGG
NC_002695.2 Escherichia coli O157:H7 str. Sakai DNA, complete genome	1562001	1562008	AAAAAAAA
NC_002695.2 Escherichia coli O157:H7 str. Sakai DNA, complete genome	1562046	1562051	AAAAAA
NC_002695.2 Escherichia coli O157:H7 str. Sakai DNA, complete genome	1562137	1562142	AAAAAA
NC_002695.2 Escherichia coli O157:H7 str. Sakai DNA, complete genome	1562468	1562473	AAAAAA
NC_002695.2 Escherichia coli O157:H7 str. Sakai DNA, complete genome	1562705	1562710	AAAAAA
NC_002695.2 Escherichia coli O157:H7 str. Sakai DNA, complete genome	1562723	1562728	AAAAAA
NC_002695.2 Escherichia coli O157:H7 str. Sakai DNA, complete genome	1562750	1562755	AAAAAA
NC_002695.2 Escherichia coli O157:H7 str. Sakai DNA, complete genome	1564472	1564478	TTTTTTT
NC_002695.2 Escherichia coli O157:H7 str. Sakai DNA, complete genome	1564525	1564531	TTTTTTT
NC_002695.2 Escherichia coli O157:H7 str. Sakai DNA, complete genome	1565941	1565946	AAAAAA
NC_002695.2 Escherichia coli O157:H7 str. Sakai DNA, complete genome	1566724	1566729	AAAAAA
NC_002695.2 Escherichia coli O157:H7 str. Sakai DNA, complete genome	1566957	1566962	GGGGGG
NC_002695.2 Escherichia coli O157:H7 str. Sakai DNA, complete genome	1567013	1567018	TTTTTT
NC_002695.2 Escherichia coli O157:H7 str. Sakai DNA, complete genome	1567246	1567252	TTTTTTT
NC_002695.2 Escherichia coli O157:H7 str. Sakai DNA, complete genome	1567336	1567341	TTTTTT
NC_002695.2 Escherichia coli O157:H7 str. Sakai DNA, complete genome	1567406	1567411	AAAAAA
NC_002695.2 Escherichia coli O157:H7 str. Sakai DNA, complete genome	1568043	1568048	GGGGGG
NC_002695.2 Escherichia coli O157:H7 str. Sakai DNA, complete genome	1568961	1568966	AAAAAA
NC_002695.2 Escherichia coli O157:H7 str. Sakai DNA, complete genome	1569084	1569089	AAAAAA
NC_002695.2 Escherichia coli O157:H7 str. Sakai DNA, complete genome	1569168	1569173	GGGGGG
NC_002695.2 Escherichia coli O157:H7 str. Sakai DNA, complete genome	1570750	1570755	TTTTTT
NC_002695.2 Escherichia coli O157:H7 str. Sakai DNA, complete genome	1570786	1570791	TTTTTT
NC_002695.2 Escherichia coli O157:H7 str. Sakai DNA, complete genome	1571895	1571900	AAAAAA
NC_002695.2 Escherichia coli O157:H7 str. Sakai DNA, complete genome	1572237	1572245	TTTTTTTTT
NC_002695.2 Escherichia coli O157:H7 str. Sakai DNA, complete genome	1573748	1573753	AAAAAA
NC_002695.2 Escherichia coli O157:H7 str. Sakai DNA, complete genome	1574537	1574542	AAAAAA
[truncated: 5,042 more rows]

## Sheet: O157_H7_Sakai_PhageDerived_HPT
seqID	end	matched	HPT
1	46	51	TTTTTT
1	402	407	TTTTTT
1	798	804	TTTTTTT
1	1299	1304	TTTTTT
1	1316	1321	TTTTTT
1	1723	1728	AAAAAA
1	1770	1776	AAAAAAA
1	2194	2199	TTTTTT
1	2280	2285	AAAAAA
1	2525	2531	TTTTTTT
1	2588	2593	TTTTTT
1	2820	2826	TTTTTTT
1	2885	2891	AAAAAAA
1	3199	3204	GGGGGG
1	3261	3266	AAAAAA
1	3827	3832	AAAAAA
1	4457	4462	GGGGGG
1	4506	4511	TTTTTT
1	6339	6344	AAAAAA
1	6577	6582	TTTTTT
1	6975	6980	AAAAAA
1	7491	7497	TTTTTTT
1	7514	7520	TTTTTTT
1	8943	8948	TTTTTT
1	8970	8975	TTTTTT
1	9038	9043	GGGGGG
1	9165	9170	TTTTTT
1	9823	9829	GGGGGGG
1	10646	10651	TTTTTT
1	12150	12156	AAAAAAA
1	12243	12248	TTTTTT
1	12309	12314	AAAAAA
1	12347	12353	AAAAAAA
1	12391	12397	AAAAAAA
1	12423	12428	TTTTTT
1	12547	12553	AAAAAAA
1	12887	12892	AAAAAA
1	13077	13082	TTTTTT
1	13238	13243	AAAAAA
1	13359	13364	AAAAAA
1	13408	13414	TTTTTTT
1	13564	13569	AAAAAA
1	13728	13733	TTTTTT
1	13862	13868	TTTTTTT
1	14009	14014	AAAAAA
1	14028	14034	AAAAAAA
1	14388	14395	AAAAAAAA
1	14422	14427	TTTTTT
1	14527	14532	AAAAAA
1	14559	14564	AAAAAA
1	15406	15411	CCCCCC
1	15579	15584	AAAAAA
1	15614	15620	TTTTTTT
1	16947	16952	TTTTTT
1	17396	17403	AAAAAAAA
1	17499	17504	TTTTTT
1	17517	17523	TTTTTTT
1	17542	17547	TTTTTT
1	18037	18042	AAAAAA
1	18542	18548	TTTTTTT
1	22068	22073	AAAAAA
1	22098	22104	CCCCCCC
1	22838	22843	TTTTTT
1	23132	23137	TTTTTT
1	23157	23162	AAAAAA
1	23292	23299	AAAAAAAA
1	23330	23336	AAAAAAA
1	23338	23343	TTTTTT
2	519	524	TTTTTT
2	628	633	AAAAAA
2	687	692	AAAAAA
2	744	749	AAAAAA
2	1005	1010	TTTTTT
2	1040	1045	TTTTTT
2	1759	1764	AAAAAA
2	1952	1957	TTTTTT
2	2490	2495	TTTTTT
2	4742	4747	AAAAAA
2	4861	4866	AAAAAA
2	4891	4896	AAAAAA
2	5169	5175	AAAAAAA
2	5653	5659	AAAAAAA
2	6601	6607	TTTTTTT
2	6626	6633	TTTTTTTT
2	6728	6733	TTTTTT
2	6801	6806	TTTTTT
2	6877	6883	AAAAAAA
2	6884	6890	GGGGGGG
2	7624	7629	AAAAAA
2	7809	7814	AAAAAA
2	7839	7845	TTTTTTT
2	7898	7904	TTTTTTT
2	8147	8152	TTTTTT
2	8437	8443	AAAAAAA
2	8446	8452	TTTTTTT
2	8490	8495	TTTTTT
2	8954	8959	TTTTTT
2	8974	8979	AAAAAA
2	9151	9158	TTTTTTTT
2	9340	9345	AAAAAA
2	9580	9585	AAAAAA
2	10390	10395	AAAAAA
2	10936	10941	TTTTTT
2	11461	11466	TTTTTT
2	11484	11489	TTTTTT
2	12388	12393	AAAAAA
2	14080	14085	AAAAAA
2	14388	14393	TTTTTT
2	15385	15390	TTTTTT
2	16841	16846	AAAAAA
2	17115	17120	GGGGGG
2	17878	17884	TTTTTTT
2	19178	19183	TTTTTT
2	19797	19802	AAAAAA
2	20300	20305	TTTTTT
2	22602	22607	AAAAAA
2	22842	22848	AAAAAAA
2	23028	23033	AAAAAA
2	23151	23157	AAAAAAA
2	23730	23735	GGGGGG
2	23793	23798	TTTTTT
2	24012	24017	AAAAAA
2	24529	24534	TTTTTT
2	28922	28927	TTTTTT
2	29856	29861	AAAAAA
2	29929	29934	TTTTTT
2	30191	30196	AAAAAA
2	30437	30442	GGGGGG
2	30601	30606	TTTTTT
2	31220	31225	AAAAAA
2	32494	32499	AAAAAA
2	34868	34873	TTTTTT
2	34899	34906	TTTTTTTT
2	35189	35194	GGGGGG
2	35666	35671	GGGGGG
2	35802	35807	AAAAAA
3	369	374	AAAAAA
3	2258	2263	GGGGGG
3	2481	2486	TTTTTT
3	2488	2493	TTTTTT
3	3062	3067	AAAAAA
3	3269	3274	AAAAAA
3	3309	3314	TTTTTT
3	3972	3977	TTTTTT
3	4146	4152	TTTTTTT
3	4573	4578	TTTTTT
3	4676	4681	TTTTTT
3	5431	5436	TTTTTT
3	5916	5921	AAAAAA
3	6802	6808	TTTTTTT
3	6826	6832	TTTTTTT
3	7560	7565	AAAAAA
3	7605	7611	AAAAAAA
3	8166	8171	TTTTTT
3	8209	8214	TTTTTT
3	8238	8243	TTTTTT
3	8595	8600	AAAAAA
3	8618	8623	TTTTTT
3	8681	8686	AAAAAA
3	9128	9134	AAAAAAA
3	9369	9374	AAAAAA
3	9995	10000	AAAAAA
3	10624	10631	AAAAAAAA
3	11050	11055	TTTTTT
3	11348	11353	AAAAAA
3	11983	11988	AAAAAA
3	12767	12772	AAAAAA
3	12967	12972	AAAAAA
3	13363	13368	AAAAAA
3	13811	13816	TTTTTT
3	14168	14175	TTTTTTTT
3	14180	14185	TTTTTT
3	14327	14332	AAAAAA
3	15124	15129	TTTTTT
3	15370	15375	AAAAAA
3	16059	16064	AAAAAA
3	16138	16143	AAAAAA
3	16939	16944	GGGGGG
3	17329	17334	TTTTTT
3	17551	17556	TTTTTT
3	17570	17577	TTTTTTTT
3	17809	17814	AAAAAA
3	17846	17851	GGGGGG
3	17891	17898	TTTTTTTT
3	17962	17967	TTTTTT
3	18247	18252	TTTTTT
3	18338	18343	AAAAAA
3	18404	18409	TTTTTT
3	18734	18739	TTTTTT
3	19598	19603	TTTTTT
3	19891	19898	TTTTTTTT
3	20126	20132	AAAAAAA
3	20810	20815	AAAAAA
3	22132	22137	AAAAAA
3	22200	22206	AAAAAAA
3	22692	22697	AAAAAA
3	23551	23556	TTTTTT
3	23561	23567	TTTTTTT
3	23831	23836	TTTTTT
3	23934	23939	AAAAAA
3	23971	23978	AAAAAAAA
3	24016	24021	TTTTTT
3	24041	24046	AAAAAA
3	24683	24688	TTTTTT
3	25659	25664	TTTTTT
3	26060	26065	AAAAAA
3	26304	26309	TTTTTT
3	26556	26561	TTTTTT
4	463	468	AAAAAA
4	1785	1790	AAAAAA
4	1853	1859	AAAAAAA
4	2345	2350	AAAAAA
4	3204	3209	TTTTTT
4	3214	3220	TTTTTTT
4	3484	3489	TTTTTT
4	3587	3592	AAAAAA
4	3624	3631	AAAAAAAA
4	3669	3674	TTTTTT
4	3694	3699	AAAAAA
4	4336	4341	TTTTTT
4	5312	5317	TTTTTT
4	5713	5718	AAAAAA
4	5957	5962	TTTTTT
4	6209	6214	TTTTTT
4	6269	6274	AAAAAA
4	6510	6516	TTTTTTT
4	6895	6900	AAAAAA
4	7226	7231	AAAAAA
4	9672	9677	AAAAAA
4	10156	10164	GGGGGGGGG
4	11234	11239	AAAAAA
4	11294	11299	GGGGGG
4	11329	11335	AAAAAAA
4	11550	11555	TTTTTT
4	13865	13870	GGGGGG
4	17147	17153	TTTTTTT
4	18402	18407	AAAAAA
4	19634	19639	GGGGGG
4	20406	20411	TTTTTT
4	21297	21302	GGGGGG
4	22335	22340	AAAAAA
4	25633	25638	AAAAAA
4	25868	25873	AAAAAA
4	26692	26697	TTTTTT
4	27369	27374	TTTTTT
4	28599	28606	TTTTTTTT
4	28712	28719	AAAAAAAA
5	1209	1215	TTTTTTT
5	1808	1813	AAAAAA
5	2833	2838	TTTTTT
5	5259	5264	AAAAAA
5	5452	5457	TTTTTT
5	5990	5995	TTTTTT
5	7522	7527	TTTTTT
5	7821	7826	TTTTTT
5	7919	7924	TTTTTT
5	8476	8481	TTTTTT
5	8514	8519	AAAAAA
5	9501	9507	TTTTTTT
5	9534	9539	TTTTTT
5	9640	9646	TTTTTTT
5	9854	9859	AAAAAA
5	10408	10413	TTTTTT
5	10612	10617	AAAAAA
5	10824	10829	TTTTTT
5	11316	11321	TTTTTT
5	11402	11407	AAAAAA
5	11424	11429	TTTTTT
5	11750	11756	TTTTTTT
5	12381	12386	AAAAAA
5	12912	12917	AAAAAA
5	13170	13175	AAAAAA
5	14300	14305	TTTTTT
5	14937	14942	AAAAAA
5	16041	16046	GGGGGG
5	16347	16352	AAAAAA
5	17358	17363	TTTTTT
5	18295	18300	TTTTTT
5	18482	18487	AAAAAA
5	19876	19881	GGGGGG
5	20258	20263	AAAAAA
5	20343	20349	TTTTTTT
5	20553	20558	TTTTTT
5	21004	21009	TTTTTT
5	22396	22402	AAAAAAA
5	22584	22589	AAAAAA
5	23294	23299	AAAAAA
5	24263	24268	GGGGGG
5	24380	24385	GGGGGG
5	25391	25396	TTTTTT
5	26043	26049	AAAAAAA
5	26096	26101	AAAAAA
5	26758	26763	AAAAAA
5	28606	28611	AAAAAA
5	29272	29278	TTTTTTT
5	29929	29934	AAAAAA
5	29940	29946	AAAAAAA
5	31264	31269	AAAAAA
5	33397	33402	AAAAAA
5	33677	33682	AAAAAA
5	34366	34371	TTTTTT
5	34528	34533	AAAAAA
5	34906	34911	AAAAAA
5	36038	36044	AAAAAAA
5	36086	36091	TTTTTT
5	36135	36140	TTTTTT
5	36650	36656	AAAAAAA
5	36731	36736	TTTTTT
5	37687	37692	TTTTTT
5	38854	38859	AAAAAA
5	39266	39271	AAAAAA
5	40718	40724	TTTTTTT
5	41142	41149	GGGGGGGG
5	41222	41227	TTTTTT
5	41531	41536	AAAAAA
5	42343	42348	TTTTTT
5	43052	43058	GGGGGGG
5	43092	43097	TTTTTT
5	43905	43910	AAAAAA
5	44118	44124	AAAAAAA
5	45007	45013	TTTTTTT
5	45043	45048	TTTTTT
5	46202	46208	AAAAAAA
5	46384	46389	TTTTTT
5	47243	47248	TTTTTT
5	49146	49151	AAAAAA
5	49830	49835	GGGGGG
5	49961	49967	TTTTTTT
5	50322	50327	GGGGGG
5	50642	50647	AAAAAA
5	50708	50714	AAAAAAA
5	52682	52688	AAAAAAA
5	52926	52931	GGGGGG
5	52939	52945	AAAAAAA
5	53289	53294	AAAAAA
5	55447	55453	AAAAAAA
5	56986	56991	GGGGGG
5	58340	58345	AAAAAA
5	58733	58738	TTTTTT
5	59091	59096	TTTTTT
5	60125	60130	TTTTTT
5	61266	61271	TTTTTT
5	61624	61629	AAAAAA
5	62068	62073	TTTTTT
5	62445	62450	AAAAAA
5	62695	62700	AAAAAA
5	63036	63042	TTTTTTT
5	63305	63310	AAAAAA
5	63371	63377	TTTTTTT
5	65397	65403	AAAAAAA
5	65642	65647	TTTTTT
5	66787	66792	AAAAAA
5	67158	67163	AAAAAA
5	67254	67259	AAAAAA
5	68373	68378	AAAAAA
5	69217	69222	AAAAAA
6	80	86	TTTTTTT
6	941	946	AAAAAA
6	1422	1427	TTTTTT
6	2016	2021	TTTTTT
6	2875	2880	TTTTTT
6	2941	2946	TTTTTT
6	3494	3499	TTTTTT
6	3761	3766	TTTTTT
6	3950	3955	TTTTTT
6	4078	4083	TTTTTT
6	4215	4220	TTTTTT
6	4667	4672	AAAAAA
6	5318	5323	TTTTTT
6	5517	5522	CCCCCC
6	6184	6189	TTTTTT
6	6442	6448	TTTTTTT
6	6603	6608	TTTTTT
6	6624	6629	AAAAAA
6	7139	7144	AAAAAA
6	10380	10385	AAAAAA
6	11683	11688	AAAAAA
6	11957	11962	TTTTTT
6	12108	12113	TTTTTT
6	12772	12777	TTTTTT
6	13018	13023	AAAAAA
6	13707	13712	AAAAAA
6	13786	13791	AAAAAA
6	14558	14563	AAAAAA
6	14902	14907	AAAAAA
6	14928	14934	AAAAAAA
6	15043	15048	AAAAAA
6	15289	15295	AAAAAAA
6	15457	15462	TTTTTT
6	15482	15488	TTTTTTT
6	16077	16082	GGGGGG
6	16149	16155	TTTTTTT
6	16369	16376	TTTTTTTT
6	18406	18412	AAAAAAA
6	18491	18496	TTTTTT
6	18672	18677	AAAAAA
6	18917	18922	GGGGGG
6	19126	19131	AAAAAA
6	19339	19344	AAAAAA
6	21369	21374	AAAAAA
6	22454	22461	TTTTTTTT
6	22500	22505	TTTTTT
6	22891	22896	GGGGGG
6	23198	23204	GGGGGGG
6	23216	23223	AAAAAAAA
6	23261	23266	AAAAAA
6	23352	23357	AAAAAA
6	23683	23688	AAAAAA
6	23920	23925	AAAAAA
6	23938	23943	AAAAAA
6	23965	23970	AAAAAA
6	25687	25693	TTTTTTT
6	25740	25746	TTTTTTT
6	27156	27161	AAAAAA
6	27939	27944	AAAAAA
6	28172	28177	GGGGGG
6	28228	28233	TTTTTT
6	28461	28467	TTTTTTT
6	28551	28556	TTTTTT
6	28621	28626	AAAAAA
6	29258	29263	GGGGGG
6	30176	30181	AAAAAA
6	30299	30304	AAAAAA
6	30383	30388	GGGGGG
6	31965	31970	TTTTTT
6	32001	32006	TTTTTT
6	33110	33115	AAAAAA
6	33452	33460	TTTTTTTTT
6	34964	34969	AAAAAA
6	35753	35758	AAAAAA
6	37161	37166	TTTTTT
6	37778	37783	TTTTTT
6	38064	38070	AAAAAAA
6	38296	38301	TTTTTT
6	39761	39766	GGGGGG
6	40374	40379	AAAAAA
6	40810	40815	CCCCCC
6	41504	41509	AAAAAA
6	41680	41686	AAAAAAA
6	41812	41817	TTTTTT
6	42015	42020	AAAAAA
6	42220	42227	TTTTTTTT
6	42278	42283	TTTTTT
6	42586	42592	GGGGGGG
6	43205	43211	TTTTTTT
6	43642	43648	AAAAAAA
6	43864	43870	CCCCCCC
6	44255	44260	AAAAAA
6	44432	44438	GGGGGGG
6	44490	44495	TTTTTT
6	44961	44967	AAAAAAA
6	44994	45000	AAAAAAA
6	45182	45187	AAAAAA
6	45285	45290	AAAAAA
6	45480	45485	AAAAAA
6	45647	45652	TTTTTT
6	45871	45877	AAAAAAA
6	46008	46013	GGGGGG
6	46860	46866	TTTTTTT
6	47223	47228	TTTTTT
6	48308	48313	TTTTTT
6	48779	48784	AAAAAA
6	49294	49301	TTTTTTTT
6	49743	49748	AAAAAA
6	50005	50010	TTTTTT
6	50135	50140	TTTTTT
6	50411	50416	TTTTTT
6	50561	50566	TTTTTT
6	51081	51087	TTTTTTT
6	51113	51118	AAAAAA
6	52135	52140	TTTTTT
6	52858	52863	TTTTTT
7	907	912	TTTTTT
7	1378	1383	AAAAAA
7	1893	1900	TTTTTTTT
7	2342	2347	AAAAAA
7	2604	2609	TTTTTT
7	2734	2739	TTTTTT
7	3010	3015	TTTTTT
7	3160	3165	TTTTTT
7	3680	3686	TTTTTTT
7	3712	3717	AAAAAA
7	4734	4739	TTTTTT
7	5457	5462	TTTTTT
7	5794	5799	TTTTTT
7	6042	6047	AAAAAA
7	6955	6960	AAAAAA
7	8547	8552	TTTTTT
7	8770	8775	AAAAAA
7	8869	8874	GGGGGG
7	9321	9326	AAAAAA
7	9390	9396	AAAAAAA
7	9936	9942	TTTTTTT
7	9947	9952	TTTTTT
7	10081	10086	TTTTTT
7	10119	10124	AAAAAA
7	10635	10641	AAAAAAA
7	11242	11247	AAAAAA
7	12382	12387	AAAAAA
7	12410	12415	AAAAAA
7	12435	12441	AAAAAAA
7	12832	12837	AAAAAA
7	13030	13036	AAAAAAA
7	14469	14476	AAAAAAAA
7	14509	14514	TTTTTT
7	14564	14570	AAAAAAA
7	14742	14747	AAAAAA
7	14839	14844	AAAAAA
7	15884	15890	TTTTTTT
7	15978	15983	AAAAAA
7	16247	16252	TTTTTT
7	16495	16502	TTTTTTTT
7	17157	17162	AAAAAA
7	17171	17176	TTTTTT
7	17304	17309	AAAAAA
7	17707	17712	AAAAAA
7	17815	17820	GGGGGG
7	18217	18222	AAAAAA
7	18291	18297	AAAAAAA
7	19127	19133	TTTTTTT
7	19236	19241	AAAAAA
7	20739	20744	GGGGGG
7	20810	20815	TTTTTT
7	20832	20837	AAAAAA
7	22707	22712	AAAAAA
7	23093	23098	AAAAAA
7	23743	23750	AAAAAAAA
7	25431	25437	AAAAAAA
7	25448	25453	TTTTTT
7	25527	25533	TTTTTTT
7	25736	25741	GGGGGG
7	26228	26233	AAAAAA
7	28875	28880	TTTTTT
7	29433	29439	TTTTTTT
7	30592	30597	TTTTTT
7	30708	30713	AAAAAA
7	32556	32561	TTTTTT
7	33455	33460	TTTTTT
7	33726	33731	AAAAAA
7	33948	33954	AAAAAAA
7	36108	36113	AAAAAA
7	36576	36581	AAAAAA
7	37480	37485	AAAAAA
8	1086	1091	TTTTTT
8	1202	1207	AAAAAA
8	3050	3055	TTTTTT
8	3949	3954	TTTTTT
8	4220	4225	AAAAAA
8	4442	4448	AAAAAAA
8	6602	6607	AAAAAA
8	7070	7075	AAAAAA
8	7974	7979	AAAAAA
8	8354	8359	AAAAAA
8	8451	8456	TTTTTT
8	9211	9216	AAAAAA
8	10567	10572	AAAAAA
8	10916	10921	TTTTTT
8	12150	12155	CCCCCC
8	12581	12587	TTTTTTT
8	13628	13633	AAAAAA
8	15543	15548	AAAAAA
8	16771	16777	AAAAAAA
8	17103	17108	AAAAAA
8	17428	17433	TTTTTT
8	20376	20381	AAAAAA
8	20456	20462	TTTTTTT
8	20469	20475	TTTTTTT
8	22308	22313	GGGGGG
8	22547	22552	GGGGGG
8	22959	22964	TTTTTT
8	24994	25000	AAAAAAA
8	25170	25176	GGGGGGG
8	26616	26621	AAAAAA
8	27865	27870	TTTTTT
8	29479	29484	GGGGGG
8	32282	32287	TTTTTT
8	33201	33206	AAAAAA
8	33270	33275	TTTTTT
8	33778	33783	GGGGGG
8	33947	33952	TTTTTT
8	37274	37279	AAAAAA
8	38450	38455	TTTTTT
8	38492	38497	TTTTTT
8	38926	38931	TTTTTT
8	39050	39055	TTTTTT
8	39140	39145	TTTTTT
8	39656	39661	TTTTTT
8	40074	40079	AAAAAA
8	40294	40299	TTTTTT
8	40937	40944	TTTTTTTT
8	43843	43848	AAAAAA
8	44002	44007	TTTTTT
8	45227	45234	TTTTTTTT
8	45740	45745	TTTTTT
8	46620	46625	TTTTTT
8	46824	46831	AAAAAAAA
8	46991	46996	AAAAAA
8	47434	47439	CCCCCC
8	47649	47655	AAAAAAA
8	48154	48159	AAAAAA
8	49914	49920	AAAAAAA
9	463	468	AAAAAA
9	930	935	AAAAAA
9	1317	1322	AAAAAA
9	1581	1586	AAAAAA
9	3883	3888	GGGGGG
9	6230	6235	AAAAAA
9	6820	6825	TTTTTT
9	7372	7377	AAAAAA
9	11243	11248	TTTTTT
9	12158	12163	AAAAAA
9	13388	13393	TTTTTT
9	14006	14011	TTTTTT
9	14050	14055	TTTTTT
9	14189	14194	TTTTTT
9	14377	14382	TTTTTT
9	14573	14579	TTTTTTT
9	15231	15236	TTTTTT
9	15682	15687	AAAAAA
9	15929	15934	TTTTTT
9	16592	16597	TTTTTT
9	16767	16772	TTTTTT
9	17054	17059	TTTTTT
9	17186	17191	GGGGGG
9	17193	17198	TTTTTT
9	17296	17301	TTTTTT
9	18448	18453	CCCCCC
9	20261	20266	AAAAAA
9	20311	20317	AAAAAAA
9	20318	20323	GGGGGG
9	20684	20690	TTTTTTT
9	20832	20837	TTTTTT
9	20896	20901	GGGGGG
9	21533	21538	GGGGGG
9	22098	22104	CCCCCCC
9	23049	23054	TTTTTT
9	24658	24663	TTTTTT
9	24684	24689	TTTTTT
9	24785	24790	AAAAAA
9	24847	24854	AAAAAAAA
9	25140	25145	AAAAAA
9	25390	25395	AAAAAA
9	25499	25504	AAAAAA
9	27318	27323	AAAAAA
9	27397	27402	AAAAAA
9	28405	28410	TTTTTT
9	28697	28703	AAAAAAA
9	28710	28715	TTTTTT
9	28778	28783	TTTTTT
9	28810	28816	TTTTTTT
9	29142	29147	TTTTTT
9	30747	30753	AAAAAAA
9	30938	30945	AAAAAAAA
9	31605	31610	AAAAAA
9	32927	32932	AAAAAA
9	33105	33110	TTTTTT
9	33159	33164	AAAAAA
9	33372	33377	AAAAAA
9	33930	33935	GGGGGG
9	35402	35407	AAAAAA
9	35956	35962	AAAAAAA
9	36158	36163	TTTTTT
9	36454	36459	GGGGGG
9	36761	36767	GGGGGGG
9	36779	36786	AAAAAAAA
9	36824	36829	AAAAAA
9	36915	36920	AAAAAA
9	37246	37251	AAAAAA
9	37483	37488	AAAAAA
9	37501	37506	AAAAAA
9	37528	37533	AAAAAA
9	39250	39256	TTTTTTT
9	39303	39309	TTTTTTT
9	40719	40724	AAAAAA
9	41502	41507	AAAAAA
9	41791	41796	TTTTTT
9	41855	41860	CCCCCC
9	42024	42030	TTTTTTT
9	42114	42119	TTTTTT
9	42184	42189	AAAAAA
9	42821	42826	GGGGGG
9	43739	43744	AAAAAA
9	43862	43867	AAAAAA
9	43946	43952	GGGGGGG
9	45529	45534	TTTTTT
9	45565	45570	TTTTTT
9	46674	46679	AAAAAA
9	47016	47024	TTTTTTTTT
9	49154	49159	AAAAAA
9	50562	50567	TTTTTT
9	50853	50859	AAAAAAA
9	50928	50934	AAAAAAA
9	53524	53529	TTTTTT
9	54594	54599	TTTTTT
9	54856	54861	AAAAAA
9	55102	55107	GGGGGG
9	55354	55360	TTTTTTT
9	55974	55979	AAAAAA
9	56589	56595	TTTTTTT
9	56701	56707	AAAAAAA
9	57688	57694	AAAAAAA
9	57844	57851	TTTTTTTT
9	57911	57916	AAAAAA
9	58827	58832	TTTTTT
9	58893	58898	AAAAAA
9	59035	59042	TTTTTTTT
9	59514	59519	TTTTTT
9	59611	59617	TTTTTTT
9	59696	59701	AAAAAA
9	59717	59722	AAAAAA
9	60943	60948	TTTTTT
9	61861	61866	AAAAAA
9	62455	62462	TTTTTTTT
9	62851	62857	TTTTTTT
9	63375	63380	AAAAAA
9	63542	63547	TTTTTT
9	66227	66233	AAAAAAA
9	66239	66244	AAAAAA
9	66553	66558	AAAAAA
9	67478	67483	TTTTTT
9	67679	67684	AAAAAA
9	68020	68025	AAAAAA
9	68059	68065	TTTTTTT
10	806	811	TTTTTT
10	1142	1147	TTTTTT
10	1656	1661	TTTTTT
10	1673	1678	TTTTTT
10	2484	2491	TTTTTTTT
10	2782	2787	TTTTTT
10	3926	3931	TTTTTT
10	4066	4071	TTTTTT
10	4792	4797	AAAAAA
10	5280	5285	TTTTTT
10	5376	5381	TTTTTT
10	5420	5425	TTTTTT
10	5570	5577	TTTTTTTT
10	5614	5620	TTTTTTT
10	5998	6003	TTTTTT
10	6466	6472	AAAAAAA
10	7056	7061	AAAAAA
10	7333	7338	TTTTTT
10	7709	7715	AAAAAAA
10	7790	7795	TTTTTT
10	7835	7840	TTTTTT
10	7909	7914	TTTTTT
10	8425	8430	AAAAAA
10	8629	8634	GGGGGG
10	8727	8732	AAAAAA
10	9334	9339	AAAAAA
10	9505	9510	AAAAAA
10	9986	9991	AAAAAA
10	10158	10163	AAAAAA
10	11397	11402	AAAAAA
10	11597	11602	AAAAAA
10	11995	12000	AAAAAA
10	12156	12161	AAAAAA
10	12372	12378	AAAAAAA
10	12433	12439	AAAAAAA
10	13734	13740	TTTTTTT
10	14037	14043	TTTTTTT
10	14052	14058	AAAAAAA
10	14197	14202	AAAAAA
10	14283	14288	AAAAAA
10	14930	14935	AAAAAA
10	15312	15318	TTTTTTT
10	15797	15804	TTTTTTTT
10	15871	15878	TTTTTTTT
10	15951	15956	TTTTTT
10	16262	16267	TTTTTT
10	16536	16542	TTTTTTT
10	16892	16899	TTTTTTTT
10	16995	17000	AAAAAA
10	17173	17179	AAAAAAA
10	17463	17468	TTTTTT
10	17697	17702	TTTTTT
10	18635	18640	AAAAAA
10	18670	18675	TTTTTT
10	18699	18704	AAAAAA
10	18968	18973	AAAAAA
10	19083	19088	TTTTTT
10	19412	19417	TTTTTT
10	20146	20152	TTTTTTT
10	20331	20336	TTTTTT
10	20343	20348	AAAAAA
10	20450	20455	TTTTTT
10	21018	21023	AAAAAA
10	21154	21159	GGGGGG
10	22340	22345	AAAAAA
10	22518	22523	TTTTTT
10	22572	22577	AAAAAA
10	22785	22790	AAAAAA
10	23343	23348	GGGGGG
10	24815	24820	AAAAAA
10	25369	25375	AAAAAAA
10	25571	25576	TTTTTT
10	25867	25872	GGGGGG
10	26174	26180	GGGGGGG
10	26192	26199	AAAAAAAA
10	26237	26242	AAAAAA
10	26328	26333	AAAAAA
10	26659	26664	AAAAAA
10	26896	26901	AAAAAA
10	26914	26919	AAAAAA
10	26941	26946	AAAAAA
10	28663	28669	TTTTTTT
10	28716	28722	TTTTTTT
10	30132	30137	AAAAAA
10	30915	30920	AAAAAA
10	31204	31209	TTTTTT
10	31268	31273	CCCCCC
10	31437	31443	TTTTTTT
10	31527	31532	TTTTTT
10	31597	31602	AAAAAA
10	33151	33156	AAAAAA
10	33274	33279	AAAAAA
10	33358	33364	GGGGGGG
10	34948	34955	TTTTTTTT
10	34986	34992	TTTTTTT
10	36096	36101	AAAAAA
10	36438	36445	TTTTTTTT
10	38575	38580	AAAAAA
10	39983	39988	TTTTTT
10	40874	40879	GGGGGG
10	41912	41917	AAAAAA
10	45205	45210	TTTTTT
10	45860	45865	AAAAAA
10	46223	46228	AAAAAA
10	46296	46301	TTTTTT
10	46804	46809	GGGGGG
10	46973	46978	TTTTTT
10	48204	48210	TTTTTTT
10	49598	49603	TTTTTT
10	49681	49686	AAAAAA
10	50001	50006	TTTTTT
10	50087	50092	TTTTTT
10	50678	50683	AAAAAA
11	593	598	AAAAAA
11	788	793	AAAAAA
11	1228	1234	TTTTTTT
11	1589	1594	AAAAAA
11	1616	1621	AAAAAA
11	1933	1939	TTTTTTT
11	3111	3116	TTTTTT
11	4591	4596	TTTTTT
11	4714	4719	AAAAAA
11	4783	4788	TTTTTT
11	4821	4826	TTTTTT
11	4839	4844	TTTTTT
11	5310	5315	TTTTTT
11	5901	5906	AAAAAA
11	5987	5992	AAAAAA
11	6307	6312	TTTTTT
11	6390	6395	AAAAAA
11	7379	7384	AAAAAA
11	7671	7678	TTTTTTTT
11	7784	7790	AAAAAAA
11	8308	8313	TTTTTT
11	8924	8929	AAAAAA
11	9093	9098	CCCCCC
11	9601	9606	AAAAAA
11	9671	9676	TTTTTT
11	10435	10440	TTTTTT
11	10663	10668	TTTTTT
11	13276	13281	TTTTTT
11	13353	13359	TTTTTTT
11	14388	14393	CCCCCC
11	15278	15283	AAAAAA
11	17332	17337	TTTTTT
11	18035	18041	CCCCCCC
11	18570	18575	AAAAAA
11	18768	18773	TTTTTT
11	20527	20532	TTTTTT
11	22716	22722	AAAAAAA
11	22729	22735	AAAAAAA
11	22810	22815	TTTTTT
11	25758	25763	AAAAAA
11	26083	26088	TTTTTT
11	26414	26420	TTTTTTT
11	26700	26705	TTTTTT
11	27643	27648	TTTTTT
11	28758	28763	AAAAAA
11	29348	29353	TTTTTT
11	29358	29364	TTTTTTT
11	29628	29633	TTTTTT
11	29730	29735	AAAAAA
11	29768	29774	AAAAAAA
11	30478	30483	TTTTTT
11	32503	32508	TTTTTT
11	32716	32721	TTTTTT
11	32776	32781	AAAAAA
11	33017	33023	TTTTTTT
11	33165	33171	TTTTTTT
11	33235	33240	TTTTTT
11	34557	34562	TTTTTT
11	35111	35118	AAAAAAAA
11	35331	35337	AAAAAAA
11	36066	36071	AAAAAA
11	36361	36366	AAAAAA
11	37192	37199	CCCCCCCC
11	37554	37560	AAAAAAA
11	37670	37675	TTTTTT
11	37939	37944	TTTTTT
11	37968	37973	AAAAAA
11	38003	38008	TTTTTT
11	38978	38983	TTTTTT
11	39057	39062	TTTTTT
11	40215	40220	TTTTTT
11	41700	41706	TTTTTTT
11	43370	43375	TTTTTT
11	44110	44115	CCCCCC
11	45217	45222	TTTTTT
11	45438	45443	CCCCCC
11	45566	45571	CCCCCC
11	45651	45656	TTTTTT
11	46465	46471	AAAAAAA
11	46939	46944	AAAAAA
11	47124	47129	AAAAAA
11	47679	47685	TTTTTTT
11	48559	48564	AAAAAA
11	48587	48593	AAAAAAA
11	48766	48771	AAAAAA
11	48826	48832	AAAAAAA
11	48899	48904	AAAAAA
11	49378	49383	TTTTTT
11	50196	50201	AAAAAA
11	50503	50508	TTTTTT
11	50561	50566	TTTTTT
11	50599	50604	TTTTTT
11	50617	50622	TTTTTT
11	51755	51760	TTTTTT
11	52441	52446	TTTTTT
11	52835	52840	TTTTTT
11	56429	56434	TTTTTT
11	56745	56750	TTTTTT
11	56920	56925	TTTTTT
11	58394	58401	TTTTTTTT
11	58507	58513	AAAAAAA
11	59033	59038	TTTTTT
11	59649	59654	AAAAAA
11	59818	59823	CCCCCC
11	60326	60331	AAAAAA
11	61256	61261	TTTTTT
11	61398	61403	AAAAAA
11	64091	64097	TTTTTTT
11	64173	64179	TTTTTTT
11	66103	66108	AAAAAA
11	67511	67516	TTTTTT
11	68300	68305	TTTTTT
11	69810	69816	AAAAAAA
11	70148	70153	TTTTTT
11	71266	71271	AAAAAA
11	71302	71307	AAAAAA
11	72891	72897	CCCCCCC
11	72976	72981	TTTTTT
11	73099	73104	TTTTTT
11	74017	74022	CCCCCC
11	74654	74659	TTTTTT
11	74724	74729	AAAAAA
11	74813	74819	AAAAAAA
11	74983	74988	GGGGGG
11	75047	75052	AAAAAA
11	75336	75341	TTTTTT
11	76119	76124	TTTTTT
11	77534	77540	AAAAAAA
11	77587	77593	AAAAAAA
11	79310	79315	TTTTTT
11	79337	79342	TTTTTT
11	79355	79360	TTTTTT
11	79592	79597	TTTTTT
11	79923	79928	TTTTTT
11	80014	80019	TTTTTT
11	80057	80064	TTTTTTTT
11	80076	80082	CCCCCCC
11	80384	80389	CCCCCC
11	80680	80685	AAAAAA
11	80881	80887	TTTTTTT
11	81436	81441	TTTTTT
11	82908	82913	CCCCCC
11	83466	83471	TTTTTT
11	83679	83684	TTTTTT
11	83739	83744	AAAAAA
11	83981	83987	TTTTTTT
11	84129	84135	TTTTTTT
11	84198	84203	TTTTTT
11	85384	85389	CCCCCC
11	85520	85525	TTTTTT
11	86074	86081	AAAAAAAA
11	86295	86301	AAAAAAA
11	86874	86880	TTTTTTT
11	86981	86993	CCCCCCCCCCCCC
11	87037	87042	AAAAAA
11	87444	87450	AAAAAAA
11	87780	87785	TTTTTT
11	88085	88092	TTTTTTTT
11	88980	88985	TTTTTT
11	89059	89064	TTTTTT
11	89748	89753	TTTTTT
11	89994	89999	AAAAAA
11	90658	90663	AAAAAA
11	90809	90814	AAAAAA
11	90984	90990	TTTTTTT
11	92108	92113	CCCCCC
11	92414	92420	TTTTTTT
11	93126	93131	TTTTTT
11	93437	93442	TTTTTT
11	93670	93675	TTTTTT
11	93710	93715	AAAAAA
11	93819	93824	CCCCCC
11	93920	93925	TTTTTT
11	94498	94503	TTTTTT
11	95032	95038	TTTTTTT
11	95115	95122	AAAAAAAA
11	95305	95310	GGGGGG
11	95361	95366	TTTTTT
11	95417	95422	AAAAAA
11	96222	96227	TTTTTT
11	97387	97392	GGGGGG
11	98539	98544	AAAAAA
11	98781	98786	AAAAAA
11	99068	99073	AAAAAA
11	99243	99248	AAAAAA
11	99906	99911	AAAAAA
11	100153	100158	TTTTTT
12	25	30	TTTTTT
12	795	801	AAAAAAA
12	1127	1132	TTTTTT
12	1284	1289	TTTTTT
12	1656	1661	TTTTTT
12	2079	2084	TTTTTT
12	2340	2345	AAAAAA
12	2364	2369	TTTTTT
12	2416	2421	AAAAAA
12	3499	3504	TTTTTT
12	4004	4011	AAAAAAAA
12	4462	4468	AAAAAAA
12	4971	4976	AAAAAA
12	5110	5116	AAAAAAA
12	6281	6287	TTTTTTT
12	6321	6327	AAAAAAA
12	6436	6442	TTTTTTT
12	7642	7647	AAAAAA
12	8515	8520	TTTTTT
12	8787	8792	AAAAAA
12	9516	9521	AAAAAA
12	10054	10059	AAAAAA
12	10097	10102	AAAAAA
12	10556	10561	AAAAAA
12	10998	11003	TTTTTT
12	11441	11446	AAAAAA
12	12186	12191	TTTTTT
12	12913	12918	AAAAAA
12	13651	13656	TTTTTT
12	14772	14778	TTTTTTT
12	15646	15651	TTTTTT
12	16581	16586	AAAAAA
12	17373	17378	AAAAAA
12	17422	17428	TTTTTTT
12	17575	17580	TTTTTT
12	18060	18065	CCCCCC
12	18227	18232	AAAAAA
12	20290	20295	TTTTTT
12	20540	20545	TTTTTT
12	21351	21356	TTTTTT
12	21556	21563	AAAAAAAA
12	21916	21921	AAAAAA
13	578	583	AAAAAA
13	619	624	AAAAAA
13	739	745	AAAAAAA
13	837	843	AAAAAAA
13	895	901	AAAAAAA
13	991	997	AAAAAAA
13	1009	1014	AAAAAA
13	1212	1217	AAAAAA
13	1351	1356	TTTTTT
13	1605	1611	AAAAAAA
13	2643	2648	AAAAAA
13	2936	2942	TTTTTTT
13	3048	3054	AAAAAAA
13	3664	3669	TTTTTT
13	4280	4285	AAAAAA
13	4449	4454	CCCCCC
13	4957	4962	AAAAAA
13	5027	5032	TTTTTT
13	5791	5796	TTTTTT
13	6019	6024	TTTTTT
13	8631	8636	TTTTTT
13	8708	8714	TTTTTTT
13	9743	9748	CCCCCC
13	10634	10639	AAAAAA
13	11406	11411	CCCCCC
13	12637	12642	TTTTTT
13	13891	13897	AAAAAAA
13	17174	17179	CCCCCC
13	19489	19494	AAAAAA
13	19709	19715	TTTTTTT
13	19745	19750	CCCCCC
13	19805	19810	TTTTTT
13	20880	20888	CCCCCCCCC
13	21367	21372	TTTTTT
13	21698	21703	TTTTTT
13	22326	22331	TTTTTT
13	22336	22342	TTTTTTT
13	22606	22611	TTTTTT
13	22709	22714	AAAAAA
13	22746	22752	AAAAAAA
13	22790	22795	TTTTTT
13	22815	22820	AAAAAA
13	23457	23462	TTTTTT
13	24983	24988	TTTTTT
13	25004	25009	CCCCCC
13	25196	25201	TTTTTT
13	25350	25357	CCCCCCCC
13	25843	25848	AAAAAA
13	26812	26818	TTTTTTT
13	26881	26886	TTTTTT
13	28067	28072	CCCCCC
13	28203	28208	TTTTTT
13	28757	28763	AAAAAAA
13	28977	28983	AAAAAAA
13	29556	29562	TTTTTTT
13	29663	29668	CCCCCC
13	29712	29717	AAAAAA
13	30120	30126	AAAAAAA
13	30456	30461	TTTTTT
13	30761	30768	TTTTTTTT
13	31431	31436	CCCCCC
13	31603	31609	TTTTTTT
13	31656	31661	TTTTTT
13	31735	31740	TTTTTT
13	32670	32675	AAAAAA
13	33721	33726	TTTTTT
13	34383	34388	CCCCCC
13	34517	34522	TTTTTT
13	34701	34706	TTTTTT
13	34864	34870	TTTTTTT
13	35820	35825	TTTTTT
13	37662	37667	TTTTTT
13	38073	38078	AAAAAA
13	38143	38150	TTTTTTTT
13	38883	38890	TTTTTTTT
13	40052	40057	AAAAAA
13	40080	40086	AAAAAAA
13	40806	40811	AAAAAA
13	40909	40914	AAAAAA
13	41335	41341	AAAAAAA
13	41510	41515	AAAAAA
13	42173	42178	AAAAAA
13	42213	42218	TTTTTT
13	42835	42840	AAAAAA
13	43223	43229	AAAAAAA
13	43337	43342	AAAAAA
13	43612	43617	AAAAAA
14	319	324	AAAAAA
14	3242	3247	AAAAAA
14	4306	4312	GGGGGGG
14	5463	5468	TTTTTT
15	1369	1374	CCCCCC
15	2935	2940	TTTTTT
15	3491	3496	TTTTTT
15	3835	3840	AAAAAA
15	4140	4145	TTTTTT
15	5626	5631	AAAAAA
15	5713	5718	AAAAAA
15	6553	6558	CCCCCC
15	6811	6817	AAAAAAA
15	7008	7013	AAAAAA
15	7406	7411	AAAAAA
15	7739	7744	TTTTTT
15	8246	8252	TTTTTTT
15	9590	9595	AAAAAA
15	10005	10010	TTTTTT
15	10267	10272	AAAAAA
15	11195	11200	TTTTTT
15	11337	11342	AAAAAA
15	13935	13940	TTTTTT
15	14012	14018	TTTTTTT
15	15047	15052	CCCCCC
15	15938	15943	AAAAAA
15	16710	16715	CCCCCC
15	17992	17997	TTTTTT
15	18695	18701	CCCCCCC
15	18938	18944	TTTTTTT
15	19220	19226	AAAAAAA
15	19419	19424	TTTTTT
15	20739	20744	TTTTTT
15	22280	22286	AAAAAAA
15	22747	22752	CCCCCC
15	23801	23806	AAAAAA
15	25575	25580	CCCCCC
15	26506	26511	TTTTTT
15	26810	26815	TTTTTT
15	27371	27376	TTTTTT
15	29779	29784	TTTTTT
15	29952	29958	TTTTTTT
15	29992	29997	AAAAAA
15	30713	30718	TTTTTT
15	32561	32566	TTTTTT
15	32615	32620	AAAAAA
15	33166	33171	AAAAAA
15	33199	33204	TTTTTT
15	33251	33258	TTTTTTTT
15	33602	33607	CCCCCC
15	33719	33724	CCCCCC
15	34688	34693	TTTTTT
15	35134	35139	TTTTTT
15	35422	35428	TTTTTTT
15	35944	35950	AAAAAAA
15	35977	35983	TTTTTTT
15	36610	36615	AAAAAA
15	36909	36914	AAAAAA
15	37171	37176	AAAAAA
15	37258	37263	AAAAAA
15	37380	37386	AAAAAAA
15	37466	37471	TTTTTT
15	37648	37654	CCCCCCC
15	37848	37853	CCCCCC
15	38539	38545	TTTTTTT
15	39195	39200	TTTTTT
15	40131	40136	TTTTTT
15	40437	40442	CCCCCC
15	42705	42710	TTTTTT
15	43287	43292	TTTTTT
15	43838	43845	TTTTTTTT
15	45614	45619	TTTTTT
15	45821	45827	AAAAAAA
15	46932	46937	AAAAAA
15	47204	47209	TTTTTT
15	47242	47247	AAAAAA
15	47897	47902	AAAAAA
15	48197	48202	AAAAAA
15	49729	49734	AAAAAA
15	50267	50272	AAAAAA
15	50460	50465	TTTTTT
15	51880	51885	AAAAAA
15	53214	53219	AAAAAA
15	54046	54053	AAAAAAAA
15	54266	54271	AAAAAA
15	54347	54352	AAAAAA
15	55439	55444	AAAAAA
15	56802	56807	AAAAAA
16	23	28	AAAAAA
16	164	170	TTTTTTT
16	291	296	AAAAAA
16	317	322	TTTTTT
16	1101	1107	TTTTTTT
16	1331	1336	AAAAAA
16	1450	1456	AAAAAAA
16	3802	3807	AAAAAA
16	3977	3982	TTTTTT
16	4056	4061	AAAAAA
16	7121	7127	AAAAAAA
16	7512	7517	AAAAAA
16	7687	7693	AAAAAAA
16	7813	7818	AAAAAA
16	7901	7906	TTTTTT
16	8437	8442	AAAAAA
16	8532	8537	TTTTTT
16	8816	8822	TTTTTTT
16	9396	9401	TTTTTT
16	9431	9436	AAAAAA
16	10825	10830	AAAAAA
16	11501	11506	TTTTTT
16	11841	11846	TTTTTT
16	12083	12089	TTTTTTT
16	12209	12214	AAAAAA
16	12301	12306	TTTTTT
16	12353	12358	AAAAAA
16	12635	12640	AAAAAA
16	12722	12727	AAAAAA
16	13364	13370	AAAAAAA
16	13689	13695	TTTTTTT
17	10	15	AAAAAA
17	776	781	AAAAAA
17	1138	1143	AAAAAA
17	1180	1185	AAAAAA
17	1236	1242	CCCCCCC
17	1244	1250	TTTTTTT
17	1357	1362	AAAAAA
17	2209	2214	TTTTTT
17	2346	2351	AAAAAA
17	2386	2392	TTTTTTT
17	2686	2691	AAAAAA
17	2731	2736	AAAAAA
17	3898	3903	AAAAAA
17	4101	4108	AAAAAAAA
17	4674	4680	AAAAAAA
17	4761	4768	AAAAAAAA
17	4796	4802	TTTTTTT
17	5053	5058	TTTTTT
17	5136	5141	AAAAAA
17	5604	5610	TTTTTTT
17	5716	5722	AAAAAAA
17	6157	6162	AAAAAA
17	8967	8972	TTTTTT
17	9180	9185	TTTTTT
17	9234	9239	AAAAAA
17	9412	9417	TTTTTT
17	10734	10739	TTTTTT
17	11298	11303	AAAAAA
17	11405	11410	TTTTTT
17	11417	11422	AAAAAA
17	11602	11608	AAAAAAA
17	12068	12073	AAAAAA
17	12111	12117	AAAAAAA
17	12120	12126	TTTTTTT
17	12411	12416	AAAAAA
17	12659	12665	AAAAAAA
17	12763	12768	AAAAAA
17	13742	13748	TTTTTTT
17	14021	14026	TTTTTT
17	14051	14056	TTTTTT
17	14170	14175	TTTTTT
17	14888	14893	TTTTTT
17	15067	15072	AAAAAA
17	15474	15479	AAAAAA
17	15613	15619	TTTTTTT
17	16097	16102	AAAAAA
17	16347	16352	AAAAAA
17	16708	16713	TTTTTT
17	17268	17273	AAAAAA
17	17289	17294	TTTTTT
17	17552	17557	AAAAAA
17	17691	17698	TTTTTTTT
17	18126	18131	AAAAAA
17	18706	18711	TTTTTT
17	18748	18753	AAAAAA
17	19178	19184	TTTTTTT
17	19374	19380	TTTTTTT
17	19382	19388	TTTTTTT
17	19660	19666	TTTTTTT
17	19917	19923	AAAAAAA
17	20225	20231	AAAAAAA
17	20393	20398	AAAAAA
17	20827	20832	TTTTTT
17	21017	21022	TTTTTT
17	21092	21097	AAAAAA
17	21149	21154	AAAAAA
17	21198	21203	TTTTTT
17	21414	21419	AAAAAA
17	21438	21443	AAAAAA
17	22268	22273	AAAAAA
17	22615	22620	TTTTTT
17	22670	22675	TTTTTT
17	23141	23146	AAAAAA
17	23213	23218	TTTTTT
17	23280	23285	TTTTTT
17	23444	23450	TTTTTTT
18	1789	1795	AAAAAAA
18	2127	2132	AAAAAA
18	2345	2350	AAAAAA
18	3840	3847	AAAAAAAA
18	4880	4885	AAAAAA
18	5950	5955	AAAAAA
18	5984	5989	TTTTTT
18	6911	6916	GGGGGG
18	7168	7173	AAAAAA
18	7268	7273	AAAAAA
18	7487	7493	TTTTTTT
18	7514	7519	GGGGGG
18	7771	7776	AAAAAA
18	8073	8079	TTTTTTT
18	8303	8308	TTTTTT
18	8653	8658	AAAAAA
18	11253	11259	AAAAAAA
18	12543	12548	AAAAAA
18	12987	12992	AAAAAA
18	14673	14678	GGGGGG
18	16259	16264	AAAAAA
18	18689	18695	AAAAAAA
18	20687	20692	AAAAAA
18	21563	21569	GGGGGGG
18	23092	23098	AAAAAAA
18	23652	23657	AAAAAA
18	25554	25559	GGGGGG
18	27112	27117	TTTTTT
18	28167	28172	AAAAAA
18	29205	29210	TTTTTT
18	31207	31212	AAAAAA
18	32393	32398	TTTTTT
18	33147	33152	TTTTTT
18	34040	34045	AAAAAA
18	34110	34115	AAAAAA
18	35468	35473	AAAAAA
18	35517	35522	AAAAAA
18	35536	35542	AAAAAAA
18	37765	37771	AAAAAAA
18	38743	38748	AAAAAA
18	39004	39009	TTTTTT
18	39105	39110	AAAAAA
18	39734	39739	AAAAAA
18	39980	39985	TTTTTT
18	40223	40228	TTTTTT

## Sheet: PhaseDerived_Sequences
>1 300052-323524
GCACCATTTAAATCAATAAGTTACACATCATTAGTACCTTCCTTATTTTTTGACTGGGACAAATTTGGGA
CCGATGGGTTCAGGATCGAGTCTATTTGCCGTGCGTGTTCGGTAAGGTGATTAGGTGCAAGGTGAGCATA
TCGACGAACCATTTCGATAGACTCCCAGCCTCCCATTTCCTGTAACACTGACAACGGGACTCCGGCTTGA
ACCAGCCAACTTGCCCAGGTGTGTCTCAAGTCGTGAAATCTGAAATCATCAATACCAGCCCGTCTCAGCG
CCGCTTTCCAGGCTGTGTTTGCGTCATACCGCATCTTCCTTACTGTTGGCGCTTTCGTTCCGTCTGGTTT
GGTACAGCTTTCCTTGTACACAAATACCCAACGGTGATGATTACCGATTTGTTTTTTCAATACGCGACAT
GCAGTATCATTCAGCGCAACGCCAATTGCGCGGTTTGATTTACTCTCTTCCGGGTTTATCCATGCCACCC
GGCGCTGCATATCTATTTGTTGCCATTCAAGGTTGATGATGTTCGAGCGTCTTAAGCCTGTTGCCAGTGC
AAATTCAACAACAGACTTTAATGGCTCCGGACATTCATCAATCAGCCTTTGTGCTTCATGGGGCTCCAGC
CAGCGGAGCCGTTTATTCTTTGGTTGAGGCACTTTAATAATTGGTGCCTTATCGAGCATTTTCCATTCAC
GCTCTGCGGCTCTTAGCAGGGCCTTTATAAATGAAAGATGCGTAGCCTTCGTTGCAACGGACGCTGGTTT
TGGCGTGTATTCTGGAACAGGTTTCCCTTTTTTTCTGCATGCTTCTGCCCTGAGTTTCCAGTTTTCCTCA
TGACGCCGGTTCGTCATTTTCTGCATTGCTGAATAAATTTTTGATTCAGTAATGTCTCTTAGTTGCATTC
CTGCGAAATGTTGAAGCCAGAATCCGATCTGCTTTCCATTGAGCCTGTTTCTCTGCGCGACGTTCGCGGC
GGCGTGTTTGTGCATCCATCTGGATTCTCCTGTTAGTTAGCTTTGGTTGTGTGTGGGAGTCGTAGTCCTG
AACGAAAACACCCCGCAATGGCACATTGGCTGCTAATCCGGATTCGCACTTCCGGCCAATGCTTCGTTTC
GTATCACACACACCAAAGCCTTCTGCTTTGAATGCTGCCCTTCTTCAGGGCTTAATTTTTAAGAGCATCA
CCTTCATGGTGGTTAGTGCGTCCTGCTGATGTGCTTAGTATCACCGCTAGTGGTATTTGTGTCAACACCG
CCAGAGATAATTTATCACCGCAGATGGTTATCTGTATGTTTTTTATATAGATTTATTTTTTGCAGGGTTG
TGTGGCTTGGGAGGTGATCGAGAGATCAGAATTGCGTTGTTTAGTGAGTTGCACCTATTAATTTTAAAAT
AAATACAATTGGTGTTTTTCGAGTTTTTCTTAACTCTTCATGCAGCTCCGTTCTCAGAATATATGATTTT
TCGAGTTTGAAATTCTTGCGACCAGGCGTCTTATTGCCAGGCTCAGGAAGTGGAAGGCGTGTTTGAATGT
CGAGTGGTGGACAGTCATAGAAGTAAATTCTATAAAGCTCAAGCGGTTCCCTACGTTCTTGTGATTGACG
TTTTCCATTAAGATGGGAAAGAACCATTGACCATATTACTTTCATTATGCATTGCGCAGTCAGTTCATGC
TCGGCGAAGTGTTTACGATGCGTAGCATGAACACGCTGCATGAAAAAACCCGCATCAATTAAAATTGCTG
CTTTCTTCATAAGAGTCCCAAAAAAATAGCCCAGAGCCGTTATGCAGATATTAACAATTGTCTGCGAACG
GGGCTGGGCTTGGTTTAATTAATCTATGCCAAGTTGACTGTGCCGTCAACATAAAACTTACTTCCTATCA
CCCAAACGTCTCTTCAGGCCACTGACTAGCGATAACTTTCCCCACAACGGAACAACTCTCATTGCATGGG
ATCATTGGGTATTGTGGGTTTAGTGGCTGTAGAAACACCTGACCGCTATCCCTGATCAGTTTCTTGAAGG
TAAACTCATCACCACCAAGTCTGGCTATACAGAAATCGCCTGGCTCAACAGCCTGCTCAGGGTCAACCAG
AATTAACATCCCGTCAGGAAAGCTGGGCTTGGATCCTGTTGGTGCGGTCATGGAATTACCTTCAACCTCA
AGCCAGAATGCAGAGCCACTGGCTTTTTTGGTTGTGCTTACCCATTTCTCCGCATCGCCTTTGGTAAAGG
TTCTAAGCTCAGGCGAGAACATCCCGGCCTGAACATGAGAAAAAACAGGGTACTCATACTCACTTCTAAG
TGACGGCTGCATACTAACCGCTTCATACATCTCGTAGATTTCTCTGGCGATTGAAGGGCTAAATTCTTCA
ACGCTAACGTTGAGAATTTTTGCAAGCAATGCGGCGTTATAAGCATTTAATGCATTGATGCCATTAAATA
AAGCACCAACGCCTGACTGCCCCATCCCCATCTTGTCTGCGACAGATTCCTGGGATAAGCCAAGTTCATT
TTTCTTTTTTTCATAAATAGCTTTAAGGCGACGTGCGTCCTCAAGCTGCTCTTGTGTTAATGGTTTCTTT
TTTGCGCTCATACGTTAAATCTATCACCGCAAGGGATAAATATCTAACACCGCGCGTGTTGACTACTTTA
CCTCTGGCGGTGATAATGGTTGCATGTACTAAGGAGGTTGTATGGAACAACGCATAACCCTGAAAGATTA
TGCAATGCGCTTTGGGCAAACCAAGACAGCTAAAGATCTCGGCGTATATCAAAGCGCGATCAACAAGGCC
ATTCATGCAGGCCGAAAGATTTTTTTAACTATAAACGCTGATGGAAGCGTTTATGCGGAAGAGGTAAAGC
CCTTCCCGAGTAACAAAAAAACAACAGCATAAATAACCCCGCTCTTACACATTCCAGCCCTGAAAAAGGG
CATCCAATTAAACCACACCTATGGTGTATGCATTTATTTGCATACATTCAATCAATTGTTATCTAAGGAA
ATACTTACATATGGTTCGTGCAAACAAACGCAACGAGGCTCTACGAATCGAGAGTGCGTTGCTTAACAAA
ATCGCAATGCTTGGAACTGAGAAGACAGCGGAAGCTGTGGGAGTTGATAAGTCGCAGATCAGCAGGTGGA
AGAGAGACTGGATTCCAAAGTTCTCAATGCTGCTTGCTGTTCTTGAATGGGGGGTCGTTGACGACGACAT
GGCTCGATTGGCGCGACAAGTTGCTGCGATTCTCACCAATAAAAAACGCCCGGCGGCAACCGAGCGTTCT
GAACAAATCCAGATGGAGTTCTGAGGTCATTACTGGATCTATCAACAGGAGTCATTATGACAAATACAGC
AAAAATACTCAACTTCGGCAGAGGTAACTTTGCCGGACAGGAGCGTAATGTGGCAGATCTCGATGATGGT
TACGCCAGACTATCAAATATGCTGCTTGAGGCTTATTCGGGCGCAGATCTGACCAAGCGACAGTTTAAAG
TGCTGCTTGCCATTCTGCGTAAAACCTATGGGTGGAATAAACCAATGGACAGAATCACCGATTCTCAACT
TAGCGAGATTACAAAGTTACCTGTCAAACGGTGCAATGAAGCCAAGTTAGAACTCGTCAGAATGAATATT
ATCAAGCAGCAAGGCGGCATGTTTGGACCAAATAAAAACATCTCAGAATGGTGTATCCCTCAAAACGAGG
GAAAATCCCCTAAAACGAGGGATAAAACATCCCTCAAATTGGGGGATTGCTATCCCTCAAATTGGGGGAT
TGCTATCCCTCAAAACAGGGGGACACAAAAGACACTATTACAAAAGAAAAAAGAAAAGATTATTCGTCCG
AGAATTCTGGCGAATCCTCTGACCAGCCAGAAAACGATCTTTCTGTGGTTAAACCGGATGCTGCAATTCA
GAGCGGCAGCAAGTGGGGAACAGCAGAAGACCTGACCGCCGCAGAGTGGATGTTTGACATGGTGAAGACC
ATCGCGCCATCAGCCAGAAAACCGAATTTTGCTGGGTGGGCTAACGATATCCGCCTGATGCGTGAACGTG
ACGGACGTAACCACCGCGATATGTGTGTGCTTTTCCGCTGGGCCTGCCAGGACAACTTCTGGTCCGGTAA
CGTGCTGAGTCCGGCCAAACTCCGCGACAAGTGGACCCAGCTCGAAATCAACCGTAACAAGCAACAGGCA
GGCGTGACAGCCAGCAAACCAAAACTCGACCTGACAAACACTGACTGGATTTACGGGGTGGATTTATGAA
AAACATCGCCGCACAGATGGTTAACTTTGACCGTGAGCAGATGCGTCGGATCGCCAACATCGATAACCAG
GACATGACGATATCGGTCTGGGTCTTTCCTGATACTGATATTTCAGATGTATCGCGTGAGTTAATTGCGG
CAATTAAACAGGGGTATCTAACAGTAAAAGCCGCCGGGGTATGGGCGGGGGGCATTGAAACACCTTCGGT
GGAAACTCCATCGGAAGGCTCTAAATTTTTTGGTTTTGATATGGATAACGAATTCATCAGTGGTTTTGAT
GTAGGGGCATGGGGAGTATTACTCTGATGGCGAAAAATGACTTTAAAGCGTTTGCAACTGATCGAAATGC
CAATGTTATGTCGCAGGAGGAATGGGAAGCGTTGCCTGCGCTTATATCCGGATTTACAGCAGGGAAAGCA
TCCAGTGCGCAAGTCAATAAGGTTATTCGGCAGGCCAGCTTTATTGCTGCAGCTCTGGCCCAGTTTGTAA
GTGATAAAACGCAACGGGATGTGCTTGATAATGGTGATCTGCCCGGTTTTGTTGAATTGCTGGGATCGGG
GTTTGCTGTTGAATACCTGAGCCGCAAGAATCCGTTTGGCGATATCAAATCGGACGGCACGGTGAAAACG
GCTCTTCAAAACCTTGGTTTGGGAGAAGGTGCTCCAGCTATTGGCGTTCCGTTCTTCTGGCCGTCCGCTG
CAATGCCAAATACTGTAATCGACAGCTGGTCCTGTATGGTGTTTTTGAAGTTCAACGGCGCGAAATTCTC
TGCCACTGATTATCCTGTGCTGGCGAAAGTGTTTCCTTCGCTGGTATTACCTGAAGCCCGCGGTGATTTC
ATTCGTATCTGGGATGACGGGCGAGGTGCAGACGGTGGTCGCGAATTATTAAGCTGGCAGGCAGCTACAA
ACTTTTCTCAGTTTGCCGGGAATATAGGCGAAGGTGCGGGACACGCAATTAACTTTCATGATGGCATCGC
CGGAAATCAGCCAGGATTTTCACGATTTAATTTCACCAGTAACTCTGTGGGTGATGGTGTGAATTTTGTT
GCAGTCAGACCGCGAAATATTGCATTTAACTTTCTGGTGAGGGCTAAATAATGAAACCTGTTTTTGATGA
AAATGGGCTGGCTACAGTGCCGGGCGATATGCGTTGTTTTTATTATGATGCTGAAACATCTGAGTATACG
GGCTGGTCTGATGAATATATTAATACTGGCGTAAGTATGCCCGCCTGTTCCACTGGTATTGACCCTGGCG
AAAACATTCCGGGAAGAGTGGCAGTATTTACAGGTAAGGGATGGAGCCATGAAGAAGACCATCGCAATGA
GACTGTTTACTCAATCGAAAATGGCGCAGCTGTTACAGTGGATTATATCGGTGCCATCAAAGACGGTTAT
GTCACGATTTCACCGTTAACGCCATACGATAAATGGGATGGTGAGAAATGGGTGACAGACACTGAGGCAC
AACACAGTGCCGCAGTAGACGCGGCAGAAGCACAGCGCCAATCACTGATTGATGCAGCAATGGCTTCCAT
TAGTCTGATTCAGCTGAAGTTACAGGCCGGACGGAAACTGACTCAGGCAGAAACAACCCGACTTAACGCC
GTGCTGGATTACATTGACGCGGTGACGGCAACAGATACCAGCACCGCGCCGGATGTCATCTGGCCTGAAC
TGCCGGAGGCGTAGGCCATTCAATATCTGGCGCACCGGAAGTATCGACCAGCTCCAGTGCGTCCAGATAA
TCCAGCCACAAATTATATTGCGTCAGTTCGTCACCTTTCAGACGACCAATAGCCGCTTTACCGGGCCATT
GCTTACTGTTCATGTATTCGTTGGCCTGGTTAATTAGTAGCTGTCTTTCTGATTCAGTAATTTCAATAAG
CTCTTCATGCGTGGGTGGAGGAATATCTGCCCACGCAGGCAGCCCATCATCTCCGGCAATACGGATTTTT
CCTTGTGGCGGTTCAGCCATAAACTCACTGATAATATTTTGATTTACTTCCTTAGCGTCTGATAAATCCC
ATCCCTCTGATTTATATTTATCAATCATATCCACAGGGAAAAAAGCATTATGCCTTGCGCTATAAACATA
TTCGTCCATATAAATCACCCTGAATAAAATTACTCACCAACAGCCCACCAACTGTAATTCATCGATACCG
TGTCGCTGGTTGATGACGTTCTGTAAGCAGAATTAAAGCCGGTTAACGTTGGGCCTTCTGCAGTCATCAC
GAACCCTCGCCCAGCGCCTAAAGGCGCACCGCCATCACCAGAATGAGTAAGCATGGCGCAGTCCGCTTTT
TTGGGGAAAGGGATGCTGAATGTAATTCTCATTGTTTGCGTCGATAATGTCGGCGTAACCGCACCACGAC
CATATTGCAGGATTTTCCCGTTGGGTAATTTCATCCATCCATTACCACTGGCAAAAGAGGCCATGTCCGG
TATCTGATTTTCCCCTGTCCCCACATCCCGTTTTGCCGCTTCTCCCAAACCAACGTTTATGAAAATGCAG
AAATAACGAGCAAATGGCATCATTCCTGCTTTTGTCAGGGAGATCTACCATGCTTATTGGCTATGTACGT
GTGTCAACAAATGACCAGAACACAGATCTACAACGTAATGCGCTGAACTGTGCAGGATGCGAGCTGATTT
TTGAAGACAAGATAAGCGGTACAAAGTCCGAAAGGCCGGGACTGAAAAAACTGCTCAGGACATTATCGGC
AGGTGACACTCTGGTTGTCTGGAAACTGGATCGGCTGGGGCGCAGTATGCGGCATCTGGTCATTCTGGTT
GAGGAGTTGCGCGAACGTGGCGTTAATTTTCGCAGCCTGACGGATGCTATTGATACCAGTACCCCAATGG
GGCGCTTTTTCTTTCATGTGATGGGGGCCCTGGCTGAAATGGAACGAGAACTGATTGTTGAACGAACAAA
AGCTGGACTGGAAGCTGCTCGCGCACAGGGACGAATTGGTGGACGTCGTCCCAAACTTACACCAGAACAA
TGGGCGCAGGCCGGACGATTAATTGCAGCAGGAATTCCTCGCCAGAAGGTAGCGATCATCTATGATGTTG
GTGTATCGACACTGTATAAGAAGTTTCCGGCCGGAGATAAATGAAACCGTAGCACGTCGTATGCAAGATC
GTGCTGCGGTTTATGCTTACCACTTGAAGATTCAAAAATTAGGTGAGTAACGAACTGGAGACATAGCTCC
TTTTTTTCTTAATTCATCTGGTATTTTTTTCCCAAGATAAAGGTTTGCTATTTCAGGTGGGGCTTCTCGA
CCTTCAAAACCATAGCGAGAGCTTTGTGTTGCCTCAAAGTCAGGGTCTTCGTCCCAGTATTTCATCGTAG
GAAAATGTTCACGCGTTGATTTTAGCCATTTATCAGCAATGAAAACTCCTCGAACGATCCCCCTTACAGT
AGCAAGAATGACTTCTGCTTTACTGGCGCGCGAGACATTAATGCGCCAGCTAAATCGAACCGCATCATAA
AGCTCTGAATCTTTTGCACTTCTGTTAACGGAAATCATTAATGCTTTATGATGAAATGTTATGGTTTCGG
GTTGATATGTTGCTATCAACTCTTTGACATGCGCGGCGCCGAATTCATTGCTGCCAGCACCATTCATGAT
ATTCGTTAACCCAGGGTAGGCATCAATAAGTGCTGCTTCAACTTCGTACGCCGTCTTTTCATCAGTCATT
CCATGTCGATGGATGACATGGATAACTTCAAGTCCCGCTAATCTTATTTCTCTGATTTGCTTTAGCTTGT
TGCTCAGTAAGTCGTCATCATCAGCCGCTGCCACTTCACCGCGCATATGGGCAAATACGCGGTTACCTTT
GCCTTTCCCTACATAGAAGGTGCTTCCGTCCCTAGGATCAATCAATCGGTATACATACCAGCCAAGGTGT
TCAATTACTCCAGAAGGAAACTCAGTAATATCCATTTTGCAATATCTGTGAATTATTTGTGAGACGTATA
TTAATGAACATTGCAAGGGCTCACAACTAGTAGTGTTGAGAAAGCCATCGGGAAAATGAGGCTAACCCTT
TGAATTTACATAGCGCAAAAAGATACCTTTCCTCATAATGTGAGCTAATTTTATGTTTCGTTTGATGATC
GGGTCGGTCTCGAAAACCGGAGTAGGGGCAACTCTACCGGGGGTTCAAATCCCCCTCTCTCCGCCACTTT
ATCAATGACTTATCTCCCGACTTCCCGTCTTGCTTTTCCTAAACAGAACAATCGTAGAATATTCTTGAAG
GGTTAGATCGTCACTGTTTTCTGTTCGATACTGTGACATTCAGCACTTGATTCGCTATGGATCTGACAGG
AAGGTTTTGAGCGAAAATCTGCAGTTATTCAGTCGTTTTCTTATCGGTCACCATTATTCTTTTAGACATT
GATCCTACAAAGCTGCCGCAAAGTTGGTGGTGGGAACTGAAGTTGCGTAGAGAAGGGGTCAATACCCGGA
GGCAAACATGGGCTGGCAAAAGTGTAGCGGTATTAGGCGCAGCTATTTAGCCTAGTTATGTTTTATGAAA
ACTTGATATCATATAAGTGTCTTACTTATTGGCTGTAAATAAGTTTTTCCTAAGGAATTGTTTCTTGAGT
ATCATTTGTAACTGTAACGGAATTTATAATCCTTTGCTTTATTGTTACGGTATTTTTTATCACACCCTAT
TTTTAGTGGTTTTTTATACTGAAGTTTGGCAAAGTGAACTTTATATACATATACTTCATCCTGGTTTCAG
TTAAATTGGGGGGATGATATGGCAACTACATGTTCAGTTATATTGATTTTGGAGTCCTTTGATGTTTATT
TCGGAAAAGAGAGTGTGTTTCTGGAGAGAGGTTCATCTGTACTTGTCGACTCTAGCTCTAGAGATTTTTT
CCTGACATATCCTGAAAGAGTGATAGTGGCGGATTTTGGCGCTGAGTTTATTAGTCGCTATTTGAAAGCT
AATAACTTAAGGGATATTTCTGATTGTAGGGAATATCCATCTTATTTAAAAATAAACTTTGCTGACTTCA
GTTTAATTAAAGGATTAATTAGTTGGGCTAATCACTGTGCTGAATACATAGAAATTTTTGATGAGTCTAT
TGCTTTTACATGTCTCTCTGCATTTTCTTCTGAAAAACAATTTGGAGTATTTCTGTTTGGATGTTTGAAA
AGCACAGGGGCTAAAGTTAAAACGATTATTCATACGGATTTATCTGCACCATGGCGTCTTAAGGATATAT
CATCAAGATTATATCTCAGCGAAAGTTTACTAAAGAGGAAATTGAAAGAAGAGGGGGTATCATTCAGTAA
GATCATACTTGATGAGAGGATGCAAATGGCTGAATATTTACTCAGCACTCGTTGTTATCCTATTAGTAAA
GTAGCTAAGGTCTGTGGTTATGCCAGTGTCTCATACTTTACTTATGTATTTAGACGTTATTTTGGTGTTT
CTCCAAGTCAATACTCTCAGAGGAGTTCAGAAAGTAAAATTCTTACTCACCAGGGAATCTGATCATTGTT
CTTGCCCCCTTATTTCCAGACAGGGGGGGTATCTTAAGTTAACGTTACCCGCTGACGTCGATATTCTCGC
GGAGAGCGATAACCCAACGCACTGTGCGGATGGTTTTCATTGTAATGTTCGATCGCCACTGCAAGATTAT
GCAATGCCGTTCTTACATTCGGTTTCGGCATGAACGCGATGTAGTCTTCCTTCATCGTTTTCACGAACCT
TTCTGCAATTCCATTACTCTGAGGACTGCTGATTGCCGTTGTGCAGGGCTCCAGATTCAACTCTCTGGCG
AACTGCCGTGTTTCATGCGCTCTATACGCTGAACCGTTATCTGTCAGCCACTGGATGGACTGTTCCGGTA
CTTTATCGCCAAAGCGTTTTTCTATCGCTCCTAACATGACATCCTGCACTGTCGCTTTATCGTAACCTCC
CGTGCTTGCGGCCCAGTCTATGGCTTCACGATCGCAACAGTCCAGGGCGATTCATCTGGGCCAATCCTTG
CTCATAACAGGCATTCACTTCAGTCATGGCAGAAAGGTATGCATGCTGGAGAAGTCGTGAAAGAAAAGAA
GACTGCTGCGCCGTTTGTCGTCACGTTTATCTTCATTGGCTATGCAAGTCGTAATACAAGGTGGGACAAA
ACTGAGACACATAAGGCCTCGCAATGGCTTGCAAGGCTTTACATGTTTTGATGTGGTGGGACGTGTGAGC
GCAGTGTTGATGGGGTAATGCTTTGAATTAGAAGCGGATTCTTATAATTCGTAATGCGAAGGTCGTAGGT
TCGACTCCTATTATCGGCACCATCTCAACTTCCTCAAACGTCCGTATTAGTCCATAAAATCTCTGATTTA
TAACATTTTTTATTCTTTTAAGTCCATAGTAGTCCGTAACCATCCAGTAGAATCCGGTACTGAATGTGTA
TAGGATTGTGTATATGTTCCTGTTCGGTCTGGATTCCTATACACATGCCTTTAAACGATATGCAGATTCG
CCGCGCTAAGCCTGAAGCTAAAGCCTATACATTTGGAGATGGGCTAGGGTTGTCATTACTTATAGAACCT
AATGGAAGCAAGAGTTGGCGGTTCCGCTATCGCTATGCCGGCAAACCCAAAATGATCTCGCTTGGTGTTT
ACCCAACGATCACCCTTGCCGATGCTCGTTCCCGTCGTGATGAAGCTCGAAAACTTGTGGCAGAAGGAAA
GAACCCTAGTGAGGTTCGAAAAGAGCAAAAGCTAGCTATGCAAACAGAGTCAGAGAACGCCTTCGAAAAG
ATAGCCAGAGAGTGGCATCAACTTAAATCTGCTAAATGGTCGGCGGGATATGCATCAGACATCATGGAAG
CGTTTAAGAACGACATTTTTCCTTATGTCGGAACAAGGCCTGTGGGAGAGATTAAACCGCTAGAGCTGCT
GAACGTTCTGCGTAAAATTGAGAAACGTGGTGCGTTGGAGAAAATGCGCAAAGTGCGGCAGCGTTGCTCC
GAAGTGTTTCGCTACGCAATTGCAACGGGTAGGGCGGAGTACAATCCTGCGGCTGATCTCTCCAGCGCTC
TCGAAGTACACCAATCCAATCATTTCCCATTCCTAAAAGCTGATGAGATACCTGATTTTCTACGTGCCTT
AGAGGGTTACTCCGGGAGTAAGCTTGTCCAGATAGCCACGAAATTACTGATGATTACGGGTGTGAGAACC
ATCGAATTACGCGCGGCATTATGGCAAGAATTTGATCTGGATAACGCTATTTGGGAAATTCCTGCTGAAA
GGATGAAAATGCGTAGGCCACATCTTGTGCCCTTATCATCTCAAGCGGTAGATTTACTCAATGAACTCAA
GATCATGACAGGGAACTATCGTTATGTTTTTCCAGGGCGGAACGATCCGAATAGGCCAATGAGCGAAGCG
AGTATAAATCAAGCCATTAAGCGTATTGGGTATGGAGGAAAAGTCACTGGACATGGTTTTCGTCATACCC
TTTCTACAATCCTGCATGAGCAAGGTTTTGAGAGTGCTTGGATTGAAATCCAGTTGGCTCATGTAGATAA
AAATTCTATTAGGGGGACTTATAACCATGCTCAATATTTTAGTGGAAGGAAGTCTATGATGGACTGGTAC
AGTAATTTGATATTTGAAAGACTAAAAAGGAGTTAATTTGTGTCTCAACCACTTTCGGAAATATTGACAT
GGGATGATGAACAATGGGAGGTATTTGTCCATGATTGGCTTATTGTCTGTAAATCAGATGATTACCCGTG
GAGCGAACGTTTGGGAGGAGCTGGAGATAAAGGTAGAGACGTTGTTGGATATAAATCGGATCCTAACGTA
GAAGGTTATTCTTGGGATAATTATCAATGCAAACTGTACAAAAAAAGTTTAGGGTTCTCTGATGTTGTAG
TTGAGTTTGGAAAACTTATCTATTTTACTCTGAATGGTGATTATCCCATCCCTCAGAAGTACTTTTTTGT
GGCACCCTATGATTTATCTACTACATTTTCTAATTTATTGAAAAATAAAAACGAGCTTAAAAAAGCAGTC
CTTGATTCATGGGATTCAGCAATTTCAAAAAAATAACTAAAAAGATTGATATTCCATTAGATGATGAAAT
AAAAAAATATATTGAGGATTTTGATTTTAGTATTTTTTACTCTCTACCCTTATCATTGATTTTAAATGAT
ATTGCAAATACACACCTTTATTTTAAGTACTTTAACGAGCTGTATGTCGTGAGAATCCCTCCAAATGAAA
TTCCAACATACAATTCAAAAAAAGAGTCTGTATATGTTAATGCACTGCTTCAAGCCTATTCAGAGCATGG
AAATAAAACTTATAGTTCTTTCTTAGAGCTTGATGATCCATACAGACGACACTTTAATAATAGTAGAAAT
GATTTTTATTTTGCATCTTCGCTTGAGGTTTTTGTCCGCGAAGTATTTAAAGATGATGTATTCAAAGCAT
TGAAATGTTACATTTCATCTTCAATTGAACCCGTCTTTTATGAAGACCATAATTATGCATTTATTAGGTG
TAATGCAGTCTTGAAGCAGGCTGTTCTGACACCAATTGCACATTCAGTACTATCAAAAATATGTGAAGCA
AATGATAAAAAAGGAATATGCCATCATTTGGTTAATGATGGTGAAGTAATTTGGACGGTGAGATAATGGT
TAGAATTTATAATTCAAGTTTAGAAGTGGCATGTCGAATGGCGAAAGTGCTCGTCGCTATTTATCCTTCT
TCATTAAGCCTTGAACGGCTTATTTGTTTTGATTTTATTTTAGTAAATCTTAAGGATTTTTTACCTGAAG
AGATTAGTCTTCATCCTCCAATACCCCGTAGAGATGCTCAGTTAGCCCTAAAACGAGAGATTGTTTTAGA
ATCATTGGCTTTGTTGCAAGGCTATGAACTAGCCTCAAAAATTTATACACATCGTGGTTTTGTATATAAA
GCTTCTGAAAAAACATATGCATTTACAAATTCTCTACATAATGAATATGTTGCGCAGATGGAGCATAATA
TAAATTTGGTGGTTAAGTTATATAGTGATATTCCTGATGAGCAGTTGCAATCAATTATAAAAAATAAAAT
TGGCAAATATGATATGGAATTTAATTATGAATGACAATTTTTTTACGTTCAGAAAAATAAAGGTAACCGG
ATTCAATAAATTAGATGCTATAATTGAATTTGGTTCTAAATTGACTATTTTATATGGTGGTTCTGACTCT
GGAAAAACATACATATATTATTTGATTCGATATTTATTAGGGAGTGAAAAACTAAAAAATAAAGATATCG
ATCATGCTCAAGGTTATGATTTAGCCTATCTGGAATTTAATTTTCAAGGTAGGGTAATGACAATTGAGAG
GTCTCTTCAGGATAGCGCCCATTACAGATTATATGATTCGAGCATTGAAAATGTTAGTGAAGCTAATCTG
TTGATGGTTTTTTCCAAAAGTGCTTCGTCTAAAAAGAGTTTTTCATCATACTTTTATGGTAGGTTGAATT
TCAAAGAGGCTAAAGTAAGAACAAACTTAAGTAATACTCTTCATAAATTTAATCTTAATAATGTTTTTGA
ATTTTTTTGTATTGATGAATTAAGAGTGTTAACTGAGAAGTCGTTAATTCTTTCTGATATTCCTAGCGAG
GAGACAAAAAGAAAGTCTGAATTTAAATTCCTTTTAACTCAGAGAGATGATACTAACTCCTTAGCAGAAA
AACCAAATAAAAAAGCAAGATATTTTTAAAAAAATCAAATTGCAAATATTTATGAGGAATTGAAAGCGCA
ATTAATTTATCCTGAATATGATCAAGTCATTGTTTCAAGAGAACTTGAGAAAGTAGAGCAAGATATTGAA
TCATCGAAAGATATATTGAAAGGTATTGTTGATGCACTTGATGATAAGAAGCAATTATTAAAAGAGTTAA
GTGATGAATTATATTCAATCAGTGACAGGGAAAAATACTTATCATTACTCATTGAAAGATTTAGTCTTCT
TAAAGACCAATACTTTATAGATCTACAAAGAATAGATGTTGTATCACAGGCGAATTTCTATTTAAATAAT
TTTGCAGATATTTATTGTGAGTTCTGTAATACACCGCAAAAAAAAGAAAATGAAATATCATATGATGATT
GTTTTTTGTCGTGTAATGCAGAAAAATTGAAAATCAAAAGCCAGCTGAAAGGATTAATTGAATCAATCGG
ATCTAATGTTCGCGAACATGAATTAATTATGTTAAGAAAAAATGATGTTAATGAAATTTATCAATCAGAA
AAAAGTGATTTTAAGACGTTAGAAGATAAAAATATAAAACAATACATTCATCTCTTGAATCACTTTATGA
ATATAAAGACAATCTTTTAATGGATCACACAAAACATAGCATTCTATCTTCATTACAAGATAAAGAAGAT
GATGTTGACGAACTTAAATACTCCGCCGAGGACTTTGACTCCTTAACAGTAGCTGATTTGTATGATATAG
AAATAGCGATGCAAGACTTTTTGAATGATATAAATTTTGAAAATTCTAAAGATAACAAAGTGCGATTTGA
CGAAGATACATATGACTTTAATATCAATGGGAAACGCCGAGGAATGTTTGGTAAAGGTACCCGTGCAGTA
ATGCATGCTATATTTACCATTTGCTTTGCGGAATTTTTATCAAGAAAAGGGAATCCATTCATTGGATTTG
TTGTGCTTGATAGTCCATTAGTGACGCACTTTGATAAAGATAGAGGGGGTTCTCTATCGGATGTTAATAG
CGTCAGTCTCAGTGATTCATTTTATCACGCATTAATCAAAAGGGACTATAATTTCCAGATTGTAATTCTT
GAGAATAAAGGTCCGACGTTCCAAATAAAAATTAATGATGCAAATAAAATCCATAACTTAAATAAGAATG
GAAGCTCTGGTTTTTATCCTGTTTAATACATTAAAAATATAACTGCTAATTGGGGTGCTCGAAATTATAT
TTCGTTTCGAGCGCTCAGTTCATTTCTAAATAATTTGCAAAATTATTTTGGGTACTTTCGCCTCTACACT
TCCTTCGGGTGGTTCCACAATAATGGATCTCACCGGCGTTTGATATTTTATAATCTAACCCCTTAGCGCG
CGCAGCCCCCCACGCCTGCTCGCTTCGCTTAACAGACTGGTTTTCATGCATTCCGCAAATCGTCTCAGAA
GCCACCACACAAGGGCTTTCGCGTCAAAAATGGTGCATGAGAATCATGCGTTTTCATGCGCTATAGACAT
GCACTCATGCGCTCTCAGGCCAGCCAGGGAAAAGGCGTAAAAAATCCCAGTACTGGACCGGGATTACGTG
GGCTTTTTTTGCTAATCAGACAGGAATTTGCTGACGGCTTGACAGCTTTGACGCGGAGCCATAGCGATTG
AGAGTTTGCTGTTGTTTTTCCGGCATTTGTGCTTTCTCTGATTCCTGTTCATTGCGCCGGGGCTTCATGA
TTATCGTATCCACACTTTCCAGTGCGGTAAATGTGTAGGAACATTCAAGATTCTGGCACTGATACCATGA
GCGTTTAACCGATGGTGCTTCATAGGCGGAGGTTCTGGCGTGTGCCGTCGTACCGCATTCGGGACATTTA
AGTGCCATTAATATTACTCCTGCATGCCGTTAATGTAATCCAGACGTTGCTGAAAGCGCAGTTGTTGTGC
AGGGGTGTAAGAGCTCTGGCAATCACGAACCATCATGGGGTCAGGCATCACACCGGATTCATCCAGAATC
ATACGATAATCCCCGGCAATTTCAGGCGGTGTTATTGCCAGCTGGCGAACCAGAGCATTGCGTAATATAC
GGGACGCAACGTCAACCCCTCCGCGCCCCTTCAGGAACGGAGCCAGTGCAGATGTCAGGGCTGCTCCATT
CGCCTGCATAAAATTGCTGAGAGCGTCTTCTGTGCAGGCCTCCATCAGTTGATGCTGCGAGTAAATGCAT
TCGCGCGCAGCACAGTTAATTTGCCATTTCAGCACATCCAGATGTTCCCGCTGTAATTCGAGCTGTCGAG
CATAATCTGCTGGTTTTTCCATGGCAGTGAGGAGTGATTCTATCTGTTGTTCAACGGCTTTTCGGCTCTC
ACTATGTCCAGCCCACAGAATACGGGCATTTCTAAAACTGATAAGCGCTTGGTCTGGAGTGACTCGGGCC
ATCATACTGCTTTCTCCTTCTCAGCACGTTCCTGACGAACCTTCATTTTATGCATAGCTGCTGGAGAGAG
TTTATTACTGAAATCCAGACGGGCCGCATAATCCGGGGCAACTCCCGCCAGTTTAAACACGGGGTCCTGT
TCGGGCATCGCATCGTTAGTCAGAGCCGGTCTGGTGATATGTTTATGAATAAAATCTTTCAGCAGTGTGT
CCGGGTCATTAACTGAATGCACCACACCGACAACTGCGCTGGCTTCCCTGCCCATTGTTGATTTGAGCAG
GCTTAGTGTCTGGATTAGTGCTTTTCCATGCGACTGCATAAAATCTTCCCAGATTTGTTTTGCGCGAATA
CCCACAAGGGTGTCGTGCGCGTGGATATACTTTCCGGCTAATTCCGCAGCCTCCTGCGGCAAAAGTGCAT
TTTCGCTTTCCTGAGCCGCCAGCAGCTCATCAAAATCCTCAAGCGTTTCTCGTCCCAGCGCAATTTCCGT
GCGCAGTTTTTTCATTTCCTTTGAGACTACGCCCTGACTTTCACGAAATAGCGTGCGCCACTCCTCATTC
AGGGCGTTCGTCGTGGCTTCCATTTCAGCGCGGCGCTGGCGGATTGTCGCAATATTATCCGCTGCCGCTT
TTTGCTGACGACGTGCTTCAAGCCATGCAGATTTGGTGGCATTCACTTTCTCAAGCGCCTGTTGCGTCGA
AACAGGGATAGAAATTTCAACGATCGGGTTATTGTTCTGTTCTGGGATTGTCATGTCAGCACCTAGTGGT
TTGTCGTGGTGTCAATTGTGCTGTGATGCATACAAAGCTGCCATTGAACGCCATTGTGCGAGCGACAAGA
CAAAGACTGAACCGCCCCGGACCTCTTTTGGCTAGCCAGAAAAGGCCTCGTTTAACTAAGGCTGTTTCAG
ACTTACCTTAACTATTCACTACTATTCACTTAGGTAAAAAAAATAGGTAATACAGAAGGTTATAAGGTGA
AGGGTTGGCATGGCAGTATTCATCGACTGTTCATAACTGTTCACATGGGAATAAAATTATTTATGGTATT
TTTTCATAATGGGTGGTTTTTTTATTCCTCGTAGCTATTTGTTTTTTGCTCCTCACCACTATTCACCCTT
ATTCAGGAGTATTCAACAGGCACATAAATAGACTGCATGTTTTTGCCGGGGAATAACATTTTCGCCTCTG
GCCATGGTGTTGCATTTCATACTGATTTTTATAAAACTAGATCTGTCCGGTTCTTTATGGATTCATTCGG
ATATATTTTACGATTTAAGGTGATGTTATTTAATATCAAGGTTTTTATGCAGGCCCAATGTTTATAAGTT
GGATGCGATTCAAAAATATGCCCGGAAATTGGGGCCTGCAATGCAAGGCCTCGTGTAGAAGTTGTACTGC
CTTGCTGTATTGGCGGTGGGGTTAGCACTATCAGGTGCAATGACCCATAGGATAGTAAACCCTGGGTGAA
TGGTAGTTCCTATTAATGCTCCTGTATTTATAGTCCGCAGGCATGGTATTTATTATGTCATTTTATATGG
TTTAATCGGGCTTTAAATTCCATAAAATCAATATGTGACGCTAAATAAAAAATGCGTGCGCAGGTGGTTT
ATATACACATAATAAGGAACTACCTGAACCCGGATAAATTCATCCGGACTGTTGTGGAAATTAAAGAGGG
TAGATAAATGCGTAATATTTCTGTGTCTGCGCCAGCTCCTGCTGCGCCATTATTTCCTGTATCGAACCAT
CATGAGCGATTTTTACGCCTGCCTGAGGTGATGCACTTATGCGGGTTGTCCCGTTCGACCGTTTACGACC
TGATCAGCCGCGATGCGTTTCCGAAGCAGATCCCGCTTGGCGGTAAAAATGTCGCCTGGGCACAGTCTGA
GGTCAGCGCATGGATGGCGGACCGCATCAGCGCCCGTGGGCGGGGATGTGATGCATGATGATACCTGCAT
ACATTAAATACCTTTATTCTGGCTTGCTTACTGTCGTCATTTCCAGGTATAGTTTTTCCGCTGTCGCAAA
ATCGGCAGCCGGAATTGGCGTTCCGTATAACTTATTGGCGACAATTGACGCCCCTTGCGTCTTTTTTTAC
GTCGTAGCTCAGGCACAACCATTTTCAGGGCTGTGGTGTTTATGCTTACACCATGGTTCTATCGAGATAA
TGGTAGTCCGGGCGGGGCAGCCTTCGGGCTGGCCGGTTTCCAATAAGGCCGGTTACGCCAACCCCGTTCG
GGCTGCCACCAGTGAAATTGGCGTTTCCGGTGGTAGCAATAACCGCTACTTATTGGAGGCTGCCATCATG
GCTACAATCCTCACCCCGTCACACCCGCAATATGTCTTTGTGTTTGCCGCAATCCGCCGTGCTGACACTC
ACCCCCGCATCTGTATGCTTCGCACTGTCTCCTGCGATGAGCGTTCCGCGCGCCGTTTGCTAGTCCGAGA
TTATGTACTCTCCCTTTCTGCACGGCTGCCTGCCGGGGAGGTGACGCTATGAACCAGTTTGAGATTTCCT
ACGACGATGTTGTAAGGCTGAAACATTTACGCAATGTGGGTGAGTATGTAACTGGCATGGCAGCCCTGCA
GGACTGTTATGAAAAGCCAGCAGGTGCCCAATGCGAACAACTGGTTTCCCTCATTTATCTGATGACAGAG
CAACTGGATGGAGTGGTGCAACGCTGCCATGACGACCTGATGAATGCGGAGGTGGCCTGATGATATGCTG
TGAATCTCTTCTGGCACTTCGTGCCGCTCTGTATCGCCGTGCCGTTGCCTGTGCCTGGCTGGCTCTAAGC
AATCATCAGGAACGTTATTCCGGCCTGACGCTCGCTGAACTTGAAGATGCCATAGCCCGCGAGCTGGAAG
GGTTCTATCTGCGCCAGCATGGGCAGCAAAGAGGGCTGGAAATTGCCTGCGCGTTGCTTTCGGATCTGAT
GGAGTCGGGGCCGCTTAAAGCCTGTCCGGTTCTCTCACTGCTCGGAATGACGGTCATGGATGAACTTTGT
TCCCGTCACCTCAACAAACCAGCGCTGCACTAAGGAGGGCCGCACAATGTCAGGAATGAAAGTTAGCCAG
GCTGAGAAAGCAGCTCGGGGTCACTGGTCAAGAATTTTACCTGCGCTGGGCGTAAATGTACTGAAAAATC
GGCACCAGCCCTGCCCGGTCTGTGCCGGGAAAGACCGCTTTCGATTTGATGACCAGGAAGGGCGGGGAAC
GTGGTTCTGTAACCAGTGCGGGGCAGGTGATGGCCTGGCGCTTGTAAGTAAAGTACTGGATGTAGGCATT
AGTGAAGCGGCAGACAGAATAAACGGCATTATCGGAAACCTGCTGCCAGTATCTCAGGGAATGCTTGAAT
CTGGTTCTCCTGAAAAAGAGGACGGGAGAAAAGCTGCAGCAGTGCTGGCTGCCCGTTTGTTTGATAAGTC
CCGCCAGACCACTGGCAATGCCTATCTGACGAGTAAAGGGTTTCCTGCACTGCCTTGCCGGGAATTAACC
GCTATGCATAAAGTCGGTGGTGTGGCATTTCGCGCGGGAGATCTTGTCGTTCCATTGTATGCAGATGGAG
AGCTGGTAAATCTGCAGTTAATCAACGCTAATGGGGGCAAATGCTTCCTTAAAGGCGGTCAGGTTAAGAA
TGCCTTTTACCTGGTTGAAGGTACTGCCAAAGCAGCCAAACGGCTCTGGATAGCGGAAGGATATGCCACC
GCACTTACTATCAACTATCTGACTGGCGATGCTGTCATGGTGGCCTTTTCGTCCGTCAATTTCCTTTCCC
TGGCGAGCATTGCCTGCAGTGAGTACCCAACGCACCAGATAATTATTGCTGCTGACCGCGATCTCAACGG
TGCGGGGCAAACAAGGGGCGCAGCTGTTACCGGGGCCTGCAATTGCACAATGGCGCTCCCGCCTGTGTTT
GGTGACTGGAACGATGCATTCACGCAAAACGGCGAAGAAGCCACCCGGCATGCAATTCATGAAGTAATAA
AACCAGCTGTTGCCAGCCCCTTCGACACAATGAGCGAAGCTGAATTTACCGCGCTGAGCGTCAGCGAAAA
AGCGCAGAGGGTAGTGGATCACTATAAAAATTCACTGGCAGTAGACCCGAACGGGCAGCTCCTTTCACGC
TATGAGGCGGGGGCCTGGAAAGTTATCTATTACGCCGATTTTGCCCGTGATGTCGCTGCGCTGTTTCAGC
GCCTCGACGCACCTTTTTCATCCGCGAAAATTGCGTCTCTCGTGGAAACCCTCAAACTGATCGTTCCGCA
ACAGCAGAATCCGGCGCGGCAACTTATCGGATTTCGCAACGGTGTGCTCGATACCCGGACAGGATTGTTC
AGCCCGCACGATAAGAAGCACTGGTTACGTACGCTGTGCGAGGTGGATTACACGCAGCCCGTTGACGGTG
AGTCACTGGAAACCCATGCCCCGGCATTCTGGCGCTGGCTGGATCGTGCCGCAGGTTTTAATCCTGAAAA
ACGGGACATTATTCTGGCTGCATTGTTTATGGTGCTGGCTAACCGTTATGACTGGCAGCTGTTTCTGGAG
GTCACTGGCCCTGGCGGAAGTGGAAAGAGTATTCTTGCTGAAATAGCAACCATGCTGGCGGGTGAAGATA
ACGCGACCTCGGCAACCATTGAAATGCTTGAGTCGCCAAGAGAACGAGCTGCGTTAATAGGTTTTTCACT
GATTCGACTTCCCGACCAGGAAAAGTGGAGCGGTGACGGGGCCGGACTAAAAGCCATCACTGGCGGCGAT
GCGGTATCCGTTGATCCCAAATATCAGAACGCCTATTCAACCCACATCCCGGCGGTCATCCTGGCTGTGA
ACAATAATCCGATGCGCTTCACTGATCGTAGTGGTGGAGTTTCACGCCGAAGGGTGATCCTGCATTTCCC
CGACCAGATAGCCCCGGAGGAACGCGATACCCAGCTCAAAGAGAAAATTGCCAGTGAGCTAGCGGTGATT
GTTCGCCAGCTTATGCAGCGTTTCAGCGACCCAATGAGTGCCAGGACATTGCTTCAGTCACAGCAGAACT
CCGATGAAGCGCTCACCATCAAACGTGATGCTGATTCAGCTTTTGATTTTTGCGGCTACCTTGAGGTCCT
ACCTGACACCACGGGCATGTTTATGGGGAACGCTAATATTGTTCCACGTCAGCCTCGAACTTACCTCTAC
CATGCCTATCTGGTCTACATGGAGGCTAACGGCTATAAAAATACGCTCAGTCTGACCATGTTTGGCAAGG
GGCTACCGTTAATGCTCAAGGAATATGGGCTGCAGTATGAGAAACGACGGACCAATCAAGGAATGCAGAC
TAATCTGGCCCTAAGAGAGGAAAGCAATGCTGACTGGTTGCCAAAATGCGATGAGTTTGCAGCGAAATAA
CTGACCTAAGACCGGCTGTGCCGGTCTTAAATCCGCTACAGGAAATTATCTCAAAATATATATCGATAAA
ATTTAAAAGTTATATGCTAAGGCGTCAGCGGAAAATGCATCTAATTCATTGTTAGATGATGTTTATTTTT
GAATTGATTTAAACATCCCATCGAGTTGTAATTTATTTATGTCGGTTTTCTTTATGGCTTTAATTAAGTT
TTCAATAACTTCCAAAGAAAAAATTACATCTTTCTTTTCAATTCTAACCCCCCCGTGGTGGCTGCAAGCA
TTAAGGATGTCCTTTGTAATTTCAACATCATTTTTCATTAATGGTTCATAGTCCAGAGCCTCAATAACAG
AAACTAAACTACCTAGCATTTGCTCTTGGTATTGAACGTTGTTTAAATGCATTATACGAATATTAACAAG
CATGAGAATATATTCTAAATATCTCCTGGCAGTATTTCCTTTCTCTTGTAAAGAATCACGATCATATTCC
TCAATACTCATGACTTCATTATGTAAAGAGGCTATTTTGTGCTCTGCTAATGAAATATTTATCGCATCCA
TGAGGTTTCGTGAGAAGCCTGTAGATGTAACATGACCATTTGCGGGCCTTGTTAAAATACATGTAGTATA
GCAATTTATATTTGGGGTCTGGATTGTCTCATTTACTCTTTTAACCGTTCTATAAACGTCTACCATATAA
GAACCTGAGTTTTCAAATGAACATGAAGAGCATTTTGTATTATATATTCTATTTAGAGATAACTGATTGT
GATAGTATCCCTTTAAGAAAGCATATATAGTGTCATTAAACTCGACAAACACAACGGACTCAATATATAT
ATGGAATTTATCATTGGGGTGCCACTCTAATTCAAGTCTTCTTGTAGAGTCATCAAAGGAAAAGTTTGAA
ATAAAATCCCAGTTACCTAAATCTATAAAATCAACGATATTTCTACCTGCACCATGGATATTTTTATTTA
TTAAAGTTGTGATTGAGTTTTTTATAATGTCCCAATCATGAATTTCATGATCGAATTTATTATTGATGGT
TTCTTTTATTTGATTGGAAAAGTTTGAATAACTAGTCACTTGTTAGCCTCAAAATTAATAATGAGTATTA
AAATTTAATTGATATTGTCTATAAAATGTAGCGATGCAATTTTATTGCAACGAAATGATTTTTACAACAT
ACCATTATCGCTAAACAAAATCGCACCCATCAAATCAACTTACGTTACAATCACTACAAAGCGATTGCAT
TTAAATTCAAAACAGTTTTCTGTTGGGCGCATTTTTTGTTGTACTGGACTAAAGAGAAAAAATGGGGTAA
GGAACAAATACCTTCCGTGCTCAAAAATTAGGTTTTTATGCACTTATTAATCAGTCAAGGTGAACAGTAA
AGTGTTCACTTCTTATCAATCGTTAATTTCATATCTTTTTGAATATTAATGAAAAAAAACACAATGAGTA
GTATGAACAGTTTTCCCCCAAAAAAAGTTTTTTCTGCCTTGAGAATGCGCGGAAAGCGAACGCCTTCACC
AATGTGTATAGGGGTGTGTGTAGTTTAAATCTTCTATTTTAATTTATGTATTAAAATCATTGTGTTGGTG
GCGATTATTGGTTCCTATTATCG
>2 892240-928363
TCATGACTTCGCCTTCTTCCCATTTCTGATCCTCTTCAAAAGGCTACCTGTTACTGGTCGATTTAAGTCA
ACCTTTACCGCTGATTCGTGGAACAGATACTCTCTTCCATCCTTAACCGGAGGAGGGAATATCCTGCATT
CGCGCACCCATCGACGAACTGTTTCAAGGCTTCTTGGGCGTCGCTGGCGTGCGTTCCACTCCTGAAGTGT
CAAGTACATCGCAAAGTCTCCGCAATTACACGCAAGAAAAAGCCGCCATCAGGCGGCTTGGTGTTCTTTC
AGTTCTTCAATTCGAATATTGGTTATGTCTGCATGTGCTATCTGCGCCCATATCATCCAGTGGTCATAGC
AGTCATTGATGTTCTCTGCTTCGATAACTCTGTTGAATGGTTCTCCATTCCATTCACCTGTGACTCGGAA
GTGCATTTATCATCTCCATAAAACAAAACCCGCCGTAGCGAGTTCAGATAAAAGAAATCCTCGTCAGTGC
GAGGATGCTGTTCATTGCTGCTATACACTTTTTTGCTCTCAACGTAAGCGGTAGCTCATTCTGTTGGGTT
GGTGCAGTTGCTTTTAGGAAATGCTATTTACCCCTTAAACGTCGGCTGAAAGAGCTAAAATCCATGCAAA
AAATTTACGCAATTTTGTGTATTATTGTGCAGTAAGTAATGAGCTATTTTCTGCGCAAAAAATGGATGGT
AAATTTGTCCGGAGCAGGAAAAATTTTATGGGCGCTAAACATGAAAAAAGATTCGTATCCTTATTTGATT
TGCATGACAGTTTTAGGCCTGATCTTTATTTTCCTTTTCTTCTGGTGGCGGGCAGATATTTACAGGGTCA
CGTTTCTTAATCAGAGTATATCCCACTATTACATTCTGTTTAGCATGGGAATAGCTTTTCTGTTATCTCT
GTTTTGGGTTAAGAAGGGGATAGTAAAACAAAGCGGCTGGAAGAGTCTGTCAGCATACCTTAAGGTTTAT
GCAGGGATGTGCATATTTGCTGGATTTTTTCTGATTATACCCCTTACAACACTAACTTATTTTTTGCCTG
GAGAGACATCGTCTTATGTTGCACCGTATCGGTATACTTCCGGTAGTTCAAAAAGTTGTTCTGGAGCTGA
GGTGGATGACCCCGATCTACATGAGAATATTCGCATTTGCTATCCGTATGGCAATTATGAGTACGATAAT
ATTATCTATGTTGAAAAGAAAATTAATACATTAGGTGCGGTAGTAACATATGCACAGACCGCGCGTGATG
ATACTGAATGAGATAGTATATAGCGGGCAAGTTTTAGTTAATTTATCGAGGTAATATAATTTACCTCGAC
TCGTTTATTCTGGTATTAATATTTCGCTTTACGATCGATTTTTATCTGATGATATCATGCGGTTTTCATA
TACTGACTTACTGTCTTTTCTCCGTTAGCGATTTTCTCCTGCTCAGCGATGATTTTATCTTTGGCTTCTA
GTTAATTTCGCTCACTTCGAACCTCTCTGTTTACTGATAAGTTCCAGATCCTCCTGGCAACTTGCACAAG
TCCGACAACCCTGAACGGCCAGGCGTCTTCGCTCATCTATGGGATCGCCACACTCACAACAATGAGTGGC
AGATATAGCCTGGTGGTTCAGGCGGCGCATTTTTATTGCTGTGTTGCGCTGTAATTCTTCAATTTCTGAT
GCTGAATCAATGATGTCTGCCATCTTCCATTAATCCCTGAATTGTTGGTTAATACGCTTGAGGGTGAATG
CGAATAATAAAAAAGGAGCCTGTAGCTCCCTGATGATTTTGCTTTTCATGTTCACCGTTCCTTAAAGACG
CCGTTTAACATGCCGATTGCCAGACTTAAGTGAGTCGGTGTGAATCCCATCAGCGTTACCGTTTCGCGGT
GCTTCTTCAGTACGCTACGGCAAATGTCATCGACGTTTTTATCCGGAAACGGCTGTCTGGCTTTTTTGAT
TTCAGAATTAGCCTGACGGGCAATACTGCGAAGGGCGTTTTCTTGCTGAGGTGTCATTGAACAAGTCCCA
TGTCGGCAAGCATAAGCACACAGAATATGAAGCCCGCTGCCAGAAAAATGCATTCAGTGGTTGTCATACC
AGGTCTCTCTCATCTGCTTCTGCTTTCGCCACCATCATTTCCAGCTTTTGCGAAAGGGATGTGGCTAACG
TATGAAATTCTTCGTCTGTTTCTACTGGTATTGGCACAAACCTGACTCCAATTTGAGCAAGGCTATGTGC
CATCTCAATACTCGTTCTTAACTCAACAGGAGATGCTTTGTGCATATCGCCTCCCGTTTATTATTTATCT
CCTCAGCCAGCCGCTGGGCTTTCAGCGGATTTCGGATAACAGAAAGGCCGGGAAATACCCAGCCTCGCTT
CGTAACGGAGTAGACGAAAGTGATCGTGCCTACGCGGATATTATCGTGAGGATGCTTCATCGCCATTGCT
CCCCAAATACAAAACCAATTTCAGCCAGTGCCTCGTCCATTTTTTCGATGAACTCCGGCACCATCTCGTC
AAAACCCGCCATGTACTTTTCATCCCGCTCAACCACGACATAATGCAGGCCTTCACGCTTCATACGCGGG
TCATAGTTGGCAAAGTACCAGGCATCTTTTCGCGTCACCCACATGCTGTACTGCACCTGGGCCATGTAAG
CCGACTTTATGGCCTCGAAACCACCGAGCCTGAACTTCATGAAATCCCGGGAGGTAAACGGGCATTTCAG
CTCAAGGCCGTTGCCGTCACTGCATAAACCATCGGGAGAGCAGGCGGTGCGCATACTTTCGTCGCGATAG
ATGATCGGGGATTCAGTAACATTCACGCCGGAAGTGAATTCAAACAGGGTTCTGGCGTCGTTCTCGTACT
GTTTTCCCCAGGCCAGCGCCTTAGCATTAACTTCCGGAGCCACACCGGTGCAAACCTCAGCCAGCAGGGT
GTGGAAGTAGGACATTTTCATGTCAGGCCACTTCTTTCCTGAGCGGGGCTTTGCTATCACGTTGTGAACT
TCTGAAGCGGTGATGACGCCGAGCCGTAATTTGTGCCATGCATCATCCCCCTGTTCGACAGCTCTCACGT
CGATCCCGGTACGCTGCAGGATAATGTCCGGTGTCATGCTGCCACCTTCTGCTCAGTGGCTTTCTGTTTC
AGGAATCCAAGAGCTTTCACTGCTTCGGCCTGTGTCAGTTCTGACGATGCGCGAATGTCGCGGCGAAATA
TCTGGGAACAGAGCGGCAATAAGTCGTCATCCCATGTTTTATCCAGGGCGATTAGCAGAGTGTTAATCTC
CTGCATGGTTTCATCGTTAACCGGAGTGATGTCGCGTTCCGGCTGGCGTTCTGCAGTGTATGCAGTATTT
TCGACAATGCGCTCGGCTTCATCCTTGTCATAGATACCAGCAAATCCGAAGGCCAGACGGGCACACTGAA
TCATAGCTTTATGCCGTAACATCCGTTTGGGATGCGACTGCCACGGCCCCGTGATTTCTCTGCCTTCGCG
GGTTTTGAATGGTTCGCGGCGGCATTCATCCATCCATTCGGTAACGCAGATCGGATGATTACGGTCCTTG
CGGTAAATCCGGCATGTACAGGATTCATTGTCCTGCTCAAAGTCCATGCCATCAAACTGCTGGTTTTCAT
TGATGATGCGGGACCAGCCATCAACGCCCACCACCGGAACGATGCCGTTCTGCTTATCAGGGAAGGCGTA
AATTTCTTTCGTCCACGGATTAAGGCCGTACTGGTTGGCGACGATCAACAATGCGATGAACTGCGCATCG
CTGGCATGAAAGCGCGATGGGGAGACAGGGCGGCATGAGACGACAGCGACGAAGTTTCACCGACATCATC
TGCGAAAACTGCAAATACCTTCCAACGAAACGCTCCAGAAATAAACGCAAGCCAATCCCAAAAGAATCTG
ACGTAAAAACCTTCAACTACACGGCTCACCTGTGGGATATCCGGTGGCTAAGACATTGTGCGAGGAAAAC
AAGGTGATTGACCAAAATCGAAGTTACGAACAAGAAAGCGTCGAGCGGGCTTTAACGTGCGCTAACTGCG
GTCAGAAGCTGCATGTGCTGGAAGTTCACGTGTGTGAGCACTGCTGCGCAGAGCTGATGAGCGATTCGAA
TAGCTCGATGCACGAGGAAAAAGATGATGGCTAAACCAGCGCGAAGACGATGTAAAAACGATGAATGTCG
GGAATGGTTTCACCCTGCATTCGCTAATCAGTGGTGGTGCTCTCCAGAGTGTGGAACCAAGATAGCACTC
GAACGACGAAGCAAAGAACGCGAAAAAGCGGAAAAGGCAGAAAAGGCAGCAGAGAAGAAACGACGACGAG
AGGAGCAGAAACAGAAAGATAAACTTAAGATTCAAAAACTCGCCTTAAAGCCCCGCAGTTACTGGATTAA
ACAAGCCCAACAAGCCGTACACGCCTTCATCAGAGAAAGAGACCGCGACTTACCATGTATCTCGTGCGGA
ACGCTCACGTCTGCTCAGTGGGATGCCGGACATTACCGGACAACTGCTGCGGCACCTCAACTCCGATTTG
ATGAACGCAATATTCACAAGCAATGCGTGGTGTGCAACCAGCACAAAAGCGGAAATCTCGTTCCGTATCG
CGTCGAACTGATTAGCCGCATCGGGCAGGAAGCAGTAGAGGAAATCGAATCAAACCATAACCGCTATCGC
TGGACTGTCGAAGAGTGCAGGGCCATCAAGGCGGAGTATCAACAGAAACTTAAAAAACTGCGAAACAGCA
GAAGTGAGGTTGCATGAATATCTACGAAAGAATTGATGGCAGCAAATACCGAAATATTTGGGTAGTTGGC
GATCTGCACGGATGCTACACGAACCTGATGAAAAAACTGGAGACGATAGGATTCGACACCAAAAAAGACC
TGCTTATCTCGGTGGGCGATTTGGTTGATCGCGGTACAGAGAACGTAGAATGCCTGGAATTAATCACATT
CCCCTGGTTCAGAGCTGTACGTGGAAACCATGAGCAAATGATGATTGATGGCTTATCAGAGCGTGGAAAC
GTCAATCACTGGCTGCTTAATGGCGGTGGCTGGTTCTTTAATCTCGATTACGACAAAGAAATTCTGGCTA
AAGCTCTTGCCCATAAAGCAGATGAACTTCCGTTAATCATCGAACTGGTGAGTAAAGGAAAAAAATATGT
CATCTGCCACGCCGATTATCCTTGTGATAAATACGAGTTTGGAAAGCCAGTTGATCATCAGCAGGTAATC
TGGAACCGCGAACGAATCAGCAACTCACAAGACGGGATCGTGAAAGAAATCAAAGGCGCGGACACGTTCA
TCTTTGGTCATACGCCAGCAGTGAAACCACTCAAATTTGCCAACCAGATGTATATCGATACTGGCGCAGT
GTTCTGCGGAAACCTCACATTGATTCAGGTACAGGGAGAAGGCGCATGAGACTCGAAAGCGTAGCTAAAT
TTCATTCGCCAAAAAGCCCGATGATGAGCGACTCACTACTGGCCACAGTTTATTGGTTTTCGTAACTGAG
TCATTTTATTATTTTATTGCAACTTTTAATCTTTTATAGTGCGAAATAAATGGAGCTGGCATTCATTTCG
CACTTTATGTTTTTGTTGGACTTATGTTATTTTGATTGAATTCAATTCAGTTAAAAAAAGAAGGTGATTG
CTCCATTTATAAATGAATAGTCATCCCCTGTCTTGAATTCTGATGTTACTTTATTAAATGCTAGTGTGAA
GGCTACAGGTGCATACCCAATTGTTGCGCCAACTTGATATTCATCAACAGTTTTGTTTAGCGATACTGTT
GTTTGTTTCGTCTGTATTGTTTTTCCTTCGAGAGTATAGTTGCGATTGACATCTCGTCTTTCCATACCTG
CAAAAATCTTGTATTTGAATCCGCTTGTATCGGACATATGCATTAAACCACGGGGAGCCAGCAGACCAAA
GCCATTATCCGAATTGAAGGTTTTATCATTACCAATGGCAATGGTTGCGCCATATGCTACATATTGAAAT
AAGTTTCCAGTAACAGCAGAAACTTCAGGGTATAATCCAACATTAGCACCTAAAATATCCATACTTGGTG
TCATGGATAGCATCCCTTTTACAGTATAACCGTAGCGATTCTCTATTTGATCATCCCATGCATGATATTT
TTCTGCCCCAATAATCTCATGAGCTTTATTTTGTACTTTCTGACCGCCTGCGTCGGGGCCAACAACACCT
ATGTCAGTACCTAATCGATAGCGAATCCAGTCATTCGCAAGGGAGTTCCATTCAATACCAGTGTGAGTGT
ATGCACTAAAAGCTCTGTCTCCAGTTACAGCTGTGTTGTGTCTTTTATTACTGCCTGATGGAGAGTAAAT
ATCTTGCGCAATATGGAGAGATAATTGGCTCGAGTCTGAGATATCGTGGCTATATCCCAGAAATAAGCCT
TGTGAGTAATCATCTCTGTTTTCATGTTTATTGCCATAAATATCATTAAGTATTGGTTGAAACTTCCCTG
CATCATCATTTGCTAATGATAATGCAAGGCTGTTCGCGATAGCTGAACACGTGGTAAATGACAGAGCAAT
AAAGACGCCAGCGATGACACTTTTTTTCATATGTTATTGTCTTCCTTTTTTTTGAATGGTGCGCGTATTT
TACATACATGAGTTTGTAATGCAAGGTGCGTAATCAATATGATGTTTTATAATTGCGTGAGACAATTGAT
TTATTCGTTTTTTATTGCGGTTTTTATTATCTTTTAATGTAACGGTGTTTTTATTAAGTGTGTTTGCGTG
GTGTTTTATGTTTTTTATAATTTTATTTTATTAAATTTAAATGCATTAGTAATGGCTATTCTATATAGCA
ATATAAGAACTGTTACAAAAAAAGGGGGGGCAATTACAGGTAGTTATGGATGATGAGTGAAACAGATATT
GGAGAACCGGGGAATGAATGATGTCTGAGTCTTATATATCAGAACTCCTTCGCTGTCGCTGGGGGCTCCT
GTGCTTATGTCGTTTCCCCGATTCGGTTTTGAACGATTACCGAATGTTGAAGAATTATGCCAAAATATAG
AAAGGATTTACTGCATGAATACCCAATATTTACAGTATGTTCGTGAGCAACTTATGGCAGCTACTGCTGA
CTTGAACGGAGCAACGAAAGGCCAGCTCGAAGCCTGGCAGGAGCATGCACAATTTGATACTGGTACATAC
AAACGAAAGAAGCCGCGCATTCTGGATGTGGTAACTGGCAAGATGATTACGCTGGATAATACGCCGACTT
CCGGTAAGCAGTCGTACGCAAAAGGTTCATCCATTGCTTTGGTCAGCCCGGTTGAATTCTCAACCTCTTC
ATGGCGCCGCGCGGTTTTGTCTCTCGATGAACATCAGAAAGCATGGTTGCTTTGGTGTTACAGCGAAAGC
GTTCGATGGGGGCATCAGGTCACCATAACGCAATGGGCATGGAGCGAGTTTAAAGATTTGTTAAGTAACA
GAAAAATTGCAGGTAAGACACTGGATCGCCTGAAGACGTTAATCTGGCTGGCTGCACAGGATGTGAAGAG
CGAACTTGCAGGGCGTGAGGCCTATGAATACCAGACACTGGCATCATTGGTGGGAGTGACAACAAAAAAC
TGGTCCGAGACATTTACTGAACGCTGGGTTGCAATGAAGCACATTTTTCTACAGCTTGATAGTGATGCTT
TATTGCTTGTGACGAGAACACGTTCAAAACAAAAGGCAGCATTTTTACAGCAAAATATTGCAAAACTGGA
TTAAAAGCCATATACTTCATGCAAATTTGGTATGTTGTAAAAAATGTATAAACCCGCTGCCGAGTGGGTT
TTTTTATGCCCTGAGTTGTACTTGTACGGTAAACATGCTGGCTGCTATGTAATAGAGTTTTTTTAGCCTG
TAACCTCTTGACGGCATTGAATTGCTTTTGTTATGAGTTGTAAGCCAATGTTATCATCTTGTATTGGGGT
GGTTATGAAGGATGGTGCGCTGCTCAGGAGTTCTTCACTTTTTATTGCCTACATGGGATGCCTTGGATGG
GGGAGTGCTTATTTCTATGGATGGGGTACTTCTTTTTACTACGGCTTCCCATGGTGGATTGTAGGTGCAG
GTGTTGATGATGTTGCCAGAAGTTTATTTTTTGCAGTTATCGTCATTGCTATATTTCTTATCGGTTGGGG
TATTGGTGTTGTATTCTTTTTCGCAGTGAAAAGAAAACATTCTATGCAAGAGCTAAATGTATTTCGCCTT
TATTTTGCTGTGGAATTATTGTTTGTGCCGGCAATTATTGAGTTTTCTATATTGAGACAGAAGATTCAGG
TACCTCTTTTGCTACTGTCAGCAGCGATTGCGCTGGCGGTTACAATTTCGATAAGATCTTATGGGCGATT
TTTATCGGTATCATGCTTCTATGATAAGCCATTTATAAAAAAACATTTTTTTGAGATTGTGATGATTGCT
TTTGTGGCATATTTCTGGCTTTTTTCATTTCTGACAGGATATTACAAACCACAGTTTAAGAAAGAATATG
AAATGATTAATTATAATGATGGTTGGTATTATGTTCTTGCTCGTTATGATAATTGTCTGGTTTTGTCTAC
TTCTTTCAATGCAGGTAGTAAAAGGTTTGTCATTTATCAATCAGCACAAGATAAGAATCTTCAGGTTGAT
ATTGTAAGGACCAGAATTTAATTGGCTGCATAAATAATATTTTAAGTTGCAAGTTGGCTATTCGTAGGAA
TAGAACCTTAGGCATGCTGAATGCGTTTCCTGAACATTGTTTTATAAACTGTGTCTGCTTGCTGTTGTGA
TCCTGCTTTTAGTGATGGTGATGATGGATTTCACCAGCAGGATAATGTTGGTACTGACTGATGGCGCTCT
GGTCTGCGGCATTGTGGTATTGCTGTGGCCGATGATGAAAGAACAGAATGAATAATTCTTGACTTTTTTG
TTTACTGTTTATTAAAAAATCAACCGCATGGTGAATCCTCCTTGGAGGGGCTAAATGATCGAGTTTTAAG
GGCACGTAGCGAGTTCTGTTTGATCATTGCAGAACTTAGCGGGAGGCGCCATGCGTACATCACTAATGTT
ATTTCCTTCTATCATTTTCCTTGTGAGTTCTGGCTGCGCATGGCGCGGCCTTTTTTTTATGACCTGCCAC
TGGCAGATGGTCATCCTGTGATTTGATTCCGGTTCCGGCTTTTTAACTCTGTTCCTGTACACGGGAGAAA
TTCTATGTCGATTAATCGTTATGATATTGGTTACAAGAAGTACCACGTATTGTGTTGAGATAGAAAGCAT
GGTGCCAGAGGTAAATGCAGCAGCATAATAAAAAAGAGCCAGCGCAGAAGAGAACGGGTAAAAGAGTCTG
CGCTGGCGTGGGGATATTCCCCGTGGAGAAATGATATGTAACACACATCGGGAACCTTTCTATATAAACA
TTATCATTATTGTCAATCATAACAGTCAGGTATTATGACGTTTATGCATCAGGGCCATCAGGAATTAACT
GGTGGCTTTTTATTGTTGTCAGCTTCCGGATAACGGGAGACGGGGTATGTACCAGATGGAAAAAATAACA
ACAGGTGTGTCATACACCACGTCAGCGGTGGGGACGGGATACTGGCTACTGCAGTTGCTGGACAAAGTCT
CCCCATCCCAGTGGGTGGCAATAGGCGTATTGGGTAGCTTGGTGTTTGGCTTGCTGACGTATCTGACAAA
CCTTTATTTCAAGATTAAAGAAGATAAGCGTAAGGCTGCGAGAGGTGAATAATGTCGCCATCATTACGCA
AGGCTGTTGCTGCTGCTATTGGTGGTGGGGCTGCTGCCATAGCGTCTGTGCTCATCACTGGTCCGAGTGG
TGACGATGGCCTGGAAGGTGTCAGCTACATACCATACGAAGATATCGTTGGCGTATGGACTGTATGTCAC
GGACACACCGGAAAAGACATCATTCCCGGTAAAACGTATACCGAAGCAGAATGCAAAGCCCTCCTGAATA
AAGACCTTGCCACGGTCGCCAGACAAATTAACCCGTACATCAAAGTCGATATACCGGAAACAACGCGCGG
CGCTCTTTACTCGTTCGTTTACAACGTGGGCGCTGGTAATTTCAGAACATCGACGCTTCTTCGCAAAATA
AACCAGGGTGATATCAAAGGCGCATGTGATCAGCTACGGCGCTGGACATACGCTGGCGGTAAGCAATGGA
AAGGGCTGATGACTCGCCGCGAGATTGAGCGTGAAGTCTGTTTGTGGGGGCAACAATGAGCAGAGTAACC
GCGATTATCTCCGCTCTGGTTATCTGCATCATCGTCTGCCAGTCATGGGCGGTTAATCATTACCGTGATA
ACGCCATCGCCTATAAAGAACAGCGTGATAAAAAAGTCAGTGAGCTGAAGCAGGCGACCGCCACCATTAC
TGACATGCAGCAGCGCCAGCGTGCTGCTGATGCACTCGATGCTAAATACACGAAGGAGTTAGCTGATGCG
AAAGCTAAAAATGATGCTCTTCGGCGCAAGCTTGATAATGGTGGTCGGGTGTTCGTCAAAGGAAAATGCC
CTGTGCCATCCTCAGACGAAACCTCCAGCGCCTCCGGCATGGGCAATGATGCCACCGTCGAACTCTCTCC
AGTTGCTGGACGAAACGTTCTCGGTATCCGGGACGGAATTATCCGCGACCAAACAGCACTGAGAACGCTT
CAGGAATACATCAGGACGCAATGCCTTCGATGATAGCGATAATTTTACTCATCATCCTTCACATCTGGCT
CTGTAGACAGGGTGGTGCTCACTTCTGGAGTGAATCATGGTTAAACATCTCATTGCTGATGCTTGATATT
GAGCATCTGGCGCGCGGTAAGGGGCTGCGTTGAGATAAGAGCCAGTCATTAAAAATACCTGGATTTAGCC
TCGCATTCGCGGGGCTTTTTTATTGCCATTACAAAAGCCACTCCCTACAGAGTGGCTTTGATAATGGCTT
ATACCCTACACGGGATAACTTAACTGATATCCCTTTTAACGGATAAAGGTATTCAAGCCTGACACATCAT
GCGCTGTATCGTCGCTGTATTCCCGCATTAACCATGACCGTAGCCCGACGGGGAACTCCTTCTGCGCGAG
TGTGCGGGAATAATCAAAAACGATGCACACCGGGTTTTTACCGCGCTAATGATTCGCGGGTTTGTCCCTC
ATGCTCGCCAGTCCTGTGCGGGGGTGGAAGAAACAGGACACTCACACAGATTCTTGTGGGTCGATGCTAT
TCCTTTCTGGATTATCCCGATGCCATTCATGCAAGGGCTGTATCAGACGTTCGTCATGGCTTTCAGGCTG
ACGGCTCCTCCCGGTGGGGTGGCCTGCCACGGGGCGGGAGCGTCGCGGAAAAAGGCTAGTTTTTGCATTT
TTATCGGCCACCATCATCTTTGCATCTTATTGATTATTAATGGTTATTTGTTTTTTGTATGTCGAATTGA
GTGTTTTTTGTTCGACATCGAACGCGTTTTCTTAAAGTTGTTCGCACGATGCATGTTTAAAGCTCTCCGG
AGGAAATATGGATCATGAGTTGAAAAACCTGGTGCTGAATATTAATCAACTGGCGGCTTTATCTGGTCTG
CACCGCCAGACTGTCGTGGCAAGACTGAAAAACATTCGTCCCGCTGGTGGACATGACAAACTCAAGCTAT
ACCGGTTGACCGATATTCTGACTGAATTTATGGGGTTACCACCGCCGGTTGCTGAGGGCGAAATGGATCC
ACATGAACGCAAAGCCTGGTATCAGTCTGAACGTGAGCGTCTTAAGTTCGAACAGGAAACGGCACAACTC
ATTCCGGCCAGTGATGTCAGACGGGAGTTTGCCATCTGGGCAAAAGCGGTCGTGCAGGTGCTGGAGACAT
TACCGGATATTCTGGAACGTGACTGTGGTCTGCAGCCTGCCGCTGTGAGCCGTGTTCAGTCCATTATTGA
TGATCTGCGCGATCAGATAGCCCTGCGGGTGACCGAAGCAGGTGCGGATGATGAGGAGGAATTACAGCAG
GAGGAGTAATGCTGAATCAGGAAACCGCAAAGGCAGCACGAACCGATTCAGGTTATATCCTTCGCGCACC
GAGACGAATGCGGGTTGCTGATGCCGTTGCTCAGTATATGCGGGTGCCCATGGGGGCCGGGAACTCAGTC
CCGTGGGATCCGCTGGTGGCACCGTATGTTATTGAGCCGATGAACTGCCTGGCCTCGCGTGAATACGACG
CAGTGATATTTGTTGGCCCGGCACGAACCGGCAAGACTATCGGCCTGATTGACGGCTGGGTGATTTACAA
CGTGATTTGCGATCCTGCGGATATGCTGATCATTCAGATGACGGAGGAAAAAGCCCGCGAACACTCCAAA
AAACGACTCGCCAGAACGTTTCGCGTCAGCCCGGAAGTGGTCAGTCGCCTGAGTCCGAACAAAAATGACA
ACAACGTTTATGACAGAACATTCCTTGCTGGCAACTACCTGAAAATCGGCTGGCCGTCAGTCAATATCAT
GTCCTCATCAGATTATAAATGCGTGGCGCTGACGGATTATGACCGTTTTCCGGAAGATATTGATGGCGAG
GGGGATGCCTTCTCTCTTGCCTCAAAACGTACCACCACATTTATGTCCAGTGGTATGACGCTGGTGGAGA
GTTCCCCCGGCAGGGATGTGAAGGATGTGAAATGGCGACGGACTTCACCGCATGAGGCTCCACCAACCAC
GGGGATACTGTCGCTCTATAACCGTGGCGATCGCCGTCGCTGGTACTGGCCCTGTCCACACTGTGGTGAG
TATTTTCAGCCCTGCGGCGATGTGGTTGCTGGTTTCCGTGATATTGCCGATCCCGTGCTGGCAAGTGAGG
CGGCTTATATTCAGTGTCCTTCCTGTTCAGGACGGATTATGCCTGAACAAAAACGTGAGCTGAACGGACG
TGGGGTCTGGTTGCGGGATGGTGAATCCATCAATGCGGATGGTAGTCGTTATGGTGATCCCCGACGCTCA
CGTATTGCGTCATTCTGGATGGAGGGTCCGGCAGCTGCTTACCAGACACTCTCGCAACTCGTTTACAAAC
TGCTTACTGCAGAACAGGAATACGAGACAACCGGAAGTGAAGAAACACTCAAGACGGTTATCAATACCGA
CTGGGGATTACCTTATCTTCCCCGCGCCAGCATGGAGCAACGAAAAAGTGAACTGCTTGAGCAGCGGGCA
GAGCCAGTTCCTTCCAGCAGTGTGCCGGATGGCGTTAATTTCCTTGTGGCGACAGTGGATGTGCAGGCGG
GACGTCATCGCCGTTTTGTGGTTCAGGTAACGGGCTATGGCAGCCGTGGCGAACGCTGGATTATTGATCG
TTACAACATCACGCAGTCATTGCGCGGTGACAGCGACGGTGAGAGCCAGCGAATTGATCCGGCCAGCTAT
CCGGAAGACTGGGATGTCCTGCTGACGGATGTTTTTCATAAAAGCTGGCCGCTGGCCTCCGATCCTTCTC
AACAAATGCGACTGATGGCAATGGCGGTGGACTCCGGCGGTGAAGACGGGGTCACTGATAATGCCTATAA
ATTCTGGCGTCGTTGCCGTCGTGATGGCCTTGGTAAACGTATTTACCTGTTTAAGGGCGACAGCATCCGG
CGCGCAAAACTGATCACCCGTACATTCCCTGATAACACCGGACGAACGGGCCGACGGGCGCAGGCCGCAG
GTGATGTGCCGCTCTGGCTTCTTCAGACGGATGCACTGAAAGACCGGGTGAATAACGCGTTATGGCGTGA
CTCTCCAGGTCCCGGCTATGTGCATTTCCCTGACTGGCTGGGGAGCTGGTTTTACGACGAACTGACGTAT
GAAGAGCGGAGTAGTGACGGGAAATGGAGTAAGCCGGGTCGCGGTGCCAACGAAGCTTTTGACCTGATGG
TGTATGCCGAGGCTCTGGTCATTCTGCATGGATACGAAAAGATCCGCTGGCCGGATGCACCGGGGTGGGC
GAGCCGGGAAACCTGGCTGGAGAGTGTCCCGGACAGTACCGAACCGTCACCCTCACCGGAACCGGTATCC
ACGCCTGTTAAAAAACAAAAACGGAAGAAAACAGTAACTGACGATGTTAACCCCTGGCTGACTTCCGGAG
GATGGTTATGAACCAGAATGATATCGAAGCCATGATTCAGCGTTATACGGAAGCTGAAATGGCGGTGCTG
GACGGAAAATCCGTCACCTTTAATGGTCAGCAGATGACCATGGAAAACTTATCTGAGATCCGGCAGGGAC
GGCAGGAGTGGGAGCGCCGCCTTGCGGCTCTGATTACACGACGACGGGGGCATCCCGGGTACCGGCTGGC
GAGGTTCTGATGGCAATTCTTGATGATGTGATTGGCGTTTTTTCACCAGGATGGAAAGCGGCAAGGCTGC
GTTCCCGTGCGGTGATCCAGGCTTATGAGGCCGTAAAAACGACGCGGACACACAAAGCCCGGCGGGAAAA
CCGAACTGCCGACCAGTTAAGCCAGTACGGGGCCGTGTCGTTACGTGAGCAGGCCCGTTACCTTGATAAC
AACCACGATCTGGTTATTGGTGTATTTGACAAGCTGGAAGAACGGGTGGTGGGGAAAAACGGGATTATTG
TCGAGCCACATCCGGTATTACGCAATGGGGCCATTGCCCGTGATCTGGCAGCGGAGATACGCACCCGATG
GAGTGAATGGTCTGTCAGTCCGGAAGTCACCGGGCAGTTTACCCGTCCGATGCTGGAACGTCTGATGCTG
CGTACCTGGCTGCGCGATGGTGAGGTGTTTGCCCAGATGGTTTCCGGGCGCATAAACAGCCTGACGCCTT
CTGCCGGTGTTCATTTCTGGCTGGAGGCGCTCGAGCCAGACTTTATTCCCATGACCAGTGATGAGAGCAA
CAGGCTGAATCAGGGCGTGTTTGTTGATGACTGGGGGCGTCCCGAAAAATATCTGGTGTATAAAAGCCGT
CCCGTATCCGGACGGCAGATGGAAACCAAAGAAGTGGATGCAGAGCGAATGCTGCATCTTAAATTTGTTC
GCCGTCTGCACCAGATGCGCGGGACGTCTTTGTTGTCCGGTGTGCTGATCCGCCTCAGTGCCCTGAAAGA
GTATGAGGATTCTGAGCTGACTGCAGCAAGGATCGCCGCTGCTCTGGGGATGTACATCCGGAAAGGCGAT
GGGCAGAGCTATGAACCGGATGGTAATGGCAGCAAGGATAAGGAACGCGAGCTTACCATTCAGCCAGGCA
TTATTTACGACGATCTGAAACCCGGCGAAGAAATCGGAATGGTGAAGTCGGATCGCCCCAATCCTAACCT
TGAAACTTTTCGTAATGGTCAGTTGCGTGCCGTGGCGGCGGGCAGTCGTCTGAATTTTTTCCAGTACAGC
GCGCAACTATAACGGCACTTACAGCGCCCAGCGTCAGGAGCTGGTTGAATCCACTGATGGCTACCTGATC
CTGCAGGACTGGTTTATTGGTGCCGTCACCCGCCCGATGTATCGTGCCTGGCTGAAACAGGCTGTGGCAT
CCGGTGTTATCAGGCTACCCCGCGATCTTGACCGTTCTTCACTGTATACCGCGGTGTATTCCGGACCGGT
GATGCCGTGGATTGACCCTGTTAAGGAGGCTGAGGCCTGGAAAATTCAGATTCGTGGTGGAGCAGCGACA
GAATCAGACTGGGTACGTGCAGGTGGTCGTAATCCGGATGATGTCAAACGTCGGCGCAAGGCCGAAATTG
ATGAAAACCGCAAGCTGGATCTGGTATTTGATACCGATCCGGCCAGTGATAAAGGAGGCAGCAGTGCCGC
AACGAAACGACAGGAGCCGCAGCACACCGACGACCAGTCCGAAGAATAATTCCTGGTTCAGGATGCAGGC
TGGTCACCAGAGTGACGCGGATATTTATATTTATGACGAGATTGGTTTCTGGGGTGTTACAGCGAAGCAG
TTTATCAGTGATCTGAATGCACTGGGCGATATCACCCACATTAATCTCAATATCAATTCACCGGGTGGCG
ATGTCTTTGAAGGCATCGCCATTTTTAATGCACTGAAAACACATGGTGCGTCCATTACCGTTTATGTCGA
CGGTGTGGCGGCGTCAATGGCGTCGGTCATTGCGATGGTGGGAAAACCGGTCATTATGCCGGAAAACTCC
TTCATGATGATTCATAAACCATTTGGCTTTACGGGCGGTGATGCGGAGGACATGCGCACCTATGCCGACC
TGCTCGATAAAGTTGAGGCGGTTCTGTTACCCGCTTATGCACAGAAAACCGGGAAAACCACCGATGAAAT
TGCTGCCATGCTGGCGGATGAGACCTGGATGTCCGGTGCCGAATGTCTGGCACATGGATTTGCTGATCAG
GTGACGCCAGCCGTTAAGGCAATGGCATGTATTCAGTCAAAACGTACAGAGGAATTTAAAAAGATGCCGG
AATCCATTCGAAACATGATTACTCCGCCACGCAACAGTGCTCCACGCGTACAGGATGATGGACCTGCAGC
CTCCCGGACGCCAGTGCAGGCAGCAGCACCTGTGGTGGATGAAAACAGTATCCGTGCGCAGGTACTGGCA
GAGCAAAAAGCGCGTGTAAACGGTATTAATGATCTGTTTGCCATGTTTGGCGGGCGTTATCAGACGCTGC
AGGCTCAGTGTCTTGCCGATCCTGAATGTTCGCTGGAGCAGGCCCGCGAAAAGCTGTTGAACGAGATGGG
GCGCGAGTCCACGCCATCTAATAAAAATACCCCGGCTCATATTTATGCCGGAAACGGTAATTTTGTGGGG
GATGGGATCCGCCAGGCGCTGATGGCGCGTGCCGGATTTGAAAAAACCGAACGTGATAATGTCTACAACG
GGATGACCCTGCGTGAATATGCCCGTATGTCACTGACTGAACGGGGTATTGGGGTTTCCAGTTATAACCC
GATGCAGATGGTCGGTGCGGCGTTCACACACAGTACGTCTGACTTCGGTAATATTCTGCTGGATGTTGCG
AACAAAGCCATTCTGCAGGGCTGGGAAGATGCCCCTGAAACCTATGAACAGTGGACGCGGAAAGGTCAGT
TGTCTGATTTTAAAATTGCCCATCGTGTGGGTATGGGGGGCTTCAGTGCTCTGCGTCAGGTGCGTGAAGG
GGCGGAATATAAATACGTCACCACCGGAGATAAACAGGCCACTATTGCACTGGCGACCTATGGCGAGCTG
TTCAGTATCACCCGTCAGGCCATTATCAATGATGATCTGAATATGCTGACCGATGTCCCGATGAAACTGG
GCCGTGCGGCGAAATCCACTATTGCCGATCTGGTTTATGCCATTCTGACGTCTAACCCGAAAATCTCCAC
AGATAATGTAAGTCTGTTCGATAAAGCGAAACATGCAAACGTACTGGAGAGCGCTGCAATGGACGTGGCA
TCGCTGGATAAAGCCCGCCAGTTGATGCGCGTTCAGAAAGAGGGGGAGCGTCATCTGAATATTCGTCCTG
CGTTCGTACTGGTACCGACGGCGATGGAGTCTGTTGCTAACCAGGTCATTCGCTCCTCAAGTGTCAAGGG
GGCTGACATTAACGCCGGTATTATTAACCCGGTGAAAGATTTTGCGACCGTTATTGCAGAGCCTCGTCTT
GATGATAACAGCCAGACCACCTTCTACCTGGCTGCGTCAAAAGGCTCCGATACGATTGAAGTGGCTTATC
TCAACGGTGTGGATACGCCATATATTGATCAGATGGAGGGCTTCAGTGTGGATGGCGTGACAACGAAAGT
GCGTATTGACGCCGGTGTCGCGCCAGTTGATCACCGCGGTCTGGTGAAATGTACGGCGTAAACGTCGCAG
ACAACAACTCTGATGGCCCGTAAGGGCTTTTTTTGTACCTGAAATCAGCCCCTGAACGGGGCTGTGCGGA
GACAGTTATGGCAAAGAATTTTGTAGAAGAAGGAAAAACGGTGGCGATTGTTGCCAGTGCAGCCATCAGC
AGCGGAGATCTGGTGCAGGTGGGCGATGTTTTTGCGGTGGCGCTGACCGATATTCCACAGGGTGAAACAG
GCGACGGCATGACCGAAGGTGTGTTTATGCTGCCTAAGCTGAAAACGGATGACATGAAAACGGGTAAGAA
GGTTTATCTGAAGTCAGGAAAAGTTCAGCTGACTAACAGCGGCTCTGATCCGCTGGTCGGGGTTGTCTGG
GCAGATGCCGGAACCAGTGCAGAAGAAGTGCCGGTAAAACTCAATGTCTGATCCCTTTTCCCGGCTGGCA
GCGCGTATGGATGCTATCACGGTCAGAAAGATGGGAAAGACAGCCTCGATTAATGATGTCGATATGACTG
TGATCCCGGGAGAAACACTGGCAGAGCTGAATGCTCTGTCCGGACCTGCGGTCTCTCTGGTGGTGTTTTC
TTCGGGATACCGCCCACGGCGCGGGGATCGCGTTGTTTATGACGGACAACAATGGACGGTCACACGGCAT
GAACGCTTTAACGGTAAGCCAATGATCTTTATTGAGTAAAGAGGTGTGGGATGAAGGGGCTTGAGAATGC
CATCCGCAATCTGAACAGCCTTGATACCCGTATGGTGCCACAGGCCAGCGCATGGGCGATAAACCGTGTG
GCACAGAAAGCGGGCTCGGTTGCCACCCGGCAGGTTGCCGGGAATACCGTTGCGGGAGATAACCAGGTGA
AAGGGATCCCCCTGAAACTGGTTCGTCAGCGTGTCCGGGTGTTTAAAGCCAGTCCGTCAGGAAAAATGAC
GGCCAGGATCCGCGTTAACCGGGGCAATCTGCCCGCCATTAAGCTGGGGACAGCCCGGGTCAGACTGGCC
CAGCGTGGTGGAAAACTGCAGTACCGTGGCAGTGTGCTGAAGGTGGGTAAATATCTTTTCCGGGATGCGT
TTATTCAGCAACTGGCGAATGGTCGCTGGCATGTGATGCGGCGTATTGATGGCAAAAATCGTTACCCCAT
TGATGTGGTGAAAATCCCGCTGTCCGGACCGCTGACACAGGCATTTGAAGATGCCCGCGACCGCATCATT
GCTGCGGAAATGCCGAAACAGCTGGGGTATGCACTGAAACAACAACTGAGGTTATGGCTGACCCGATGAA
CCGACATACACAAATCCGCCAGGTCGTACTGGCACGCCTTCGGGAACAGTGTGGAGACAGCGCCACGTTT
TTTGACGGGCTTCCGGCATTTGTTGATGCGCAGGAACTGCCTGCCGTGGCGGTGTGGCTGAGTGATGCTC
AGTACACCGGAAAAATGACGGATGAAGATGACTGGCAGGCTGTTCTGCATATTGCTGTCTTCATCCGGGC
ACAGGCACCGGATTCAGAGCTGGATATGTGGATGGAGAGCACCATTTTCCCGGCCCTGAATGATGTATCG
GCACTTTCCGGACTCATCGACACCCTGATCCCACTCGGTTTTAACTATCAACGTGATAATGAGATGGCCA
CCTGGGCGATGGCGGAAATCACGTACCAGATCACGTACACGAATTAAGGAGGTGGTAATGACCACGCCAA
ATCCACTGGCAAAGACGAAAGGTGCGGGGACGACGTTCTGGATGTATACCGGCAACGGCGATGCGTTTGC
GAACCCTTTGTCGGACACTGACTGGCTGCGTCTTGCGATGGTGAAGGATCTGCAACCTGGCGAAATGACC
GCTGATGCAGAAGATGACACTTATCTCGATGATGAAGATGCAGACTGGAAAACGACAACCCAGGGGCAGA
AATCCGTTGGTGATACTTCGGCGACGCTGGCCTGGCGTCCGGGTGACAGCGGGCAGAAAAAACTGGTTCA
GTTGTTCGACTCCGGTGAAGTCTGCGCGTTTCGTATCAAATATCCCAACGGCACTGTTGATGTTTTCCGC
GGCTGGCTGAGCTCACTGGGTAAAACCATTGCCTCAAAAGACGTGATGACCCGCACAGTGAAAATCAGCG
GTGTGGGGCGTCCATATCTGGCAGAGGAGGGCACTGAAACTGTGGGCGTTACCGGGCTGACGGTGGCACC
GGCATCCGCCAGTGTCAATGTGGGAGCAACCACCACGCTGACCTTTACAGTAAAACCTGACGGAGCCAGT
GACAAAGCGATCAGTGTGCATTCGACAGATCCACAGACAGCCACTGTGACCCTGAACGGACTTGTGGCCA
CGGTGAAAGGCGTGAAGCAGGGCAGCGTCAGCATTGTGGGCATGACCGCTGACGGGAATTTTGTGGCTGT
GGCTGCGGTGACTGTCAGCGCTGCAGGTTAACAGGACGATACTCATCATTTGCCCCGGTTATCCGGGGCT
TTTTTGCAGGTGGAGAACATGATGTTTCTGAAACAGGGCACGTTTAATTATGAAAAGCAGTCCGTGGTGC
TCAGTGAGCTGTCCGGGCTGCAGAGAATTGAATATCTGGCGTTTGTTCAGCAGCGAACGGCAAAGTTTGA
TGCCGAAGAGGGAGAACTGCCGGAGGCTGAACGACAGATTGCTTTTCTGCGGATGGGGATGGATATCAAT
GCTTGGCTGGTTTCCCGCTCACTGTGGAATGCGGAACAGTCTCAGGATGTTGAGACGCTTTGCGCATCCG
TTATTACAACATGGTCGTATGATGCCCTGGGAGCGGGGGCGGAGATGGTTCTGTCGCTGAGCGGTATGGG
AGCCATTGAGAATGCCGGGGATTTGGAGCATGAGGTGCTGACGCCGGAAAAGTCCTGACGCGGGAAATGC
AGTTTGTCATGCGGCTTGCCCGGGAGTTCCGGCGGGCAGACTGGCGGCGGATGCTGTCGGAAATGTCGGC
CACTGAGCTTGGTGAGTGGGGCGATTATTTCCGGATGCAGAGCTTCAGTGATGTGTGGATGGATGCGCAG
TTTGCCTCGCTGAAGGCATTGATCGTGAGAATGGTGTCCGGTAGCAGTGATGCTGCGGTGGCTGATTTCA
GCCTTTTACCGGAAGAGAACGGGATACCGGAGCGAACGGACGAAGAACTGATGCATCTTGGGGAAGGTAT
TTCCGGAGGTGTGCGTTATGGACCAGATAGCCAACCTGGTCATTGATTTGGGGATTGATGCGGCAGAGTT
TAAAAATGAAATTCCCCGTATCAAAAACCTTCTGAATGGTGCAGCCAGCGATGCAGAACGGTCTTCTGCC
CGTATGCAGCGTTTTATGGAGCGTCAGACTCAGGCCGCCCGGCAGACAATGCAGGCGGCTTCTTCGGCTG
CAACAGCCGCATCCGTCCATGCGCAGACGGTGGAGAAGAGCGCACAGGCTCATGAACGCATGGCCCGCGA
GGTGGAGCAAACCCGCCAGCGTATGGAGGCACTGAGCCAGAAAATGCGCGAGGAACAGGCGCAGGCCATG
GCTCTGGCGGAGGCTCAGGATAAAGCGGCTGCTGCGTTTTATCGTCAGATTGACAGTGTGAAACAGGCCG
GTGCGGGGCTGCAGGAATTACAGCGTATTCAGCAACAGATCCGACAGGCCAGAAACAGTGGCGGGATTGG
TCAGCAGGATTATCTGGCGCTGATTTCTGAGGTTACGGCGAAAACCCGTGTTCTTACACAGGCTGAGGAA
GAGGCTACCCGACAGAAAGTGGCGTTTATCCGTCAGCTTAAAGAGCAGGCAACCCGCCAGAATCTTTCTT
CTTCTGAGTTGCTTCGTGCTAAGGCTGCCCAGCTGGGGGTAAGCAGTGCTGCAGAAGTGTATATCCGCAA
AATGGAGCAGGCAGGAAAAGCCACGCATTCGCTGGGTCTGAAAAGTGCAGCAGCCCGTCAGGAGATAGGC
GTTCTGATAGGTGAACTGGCCCGCGGCAATTTAGGTGCGCTGAGGGGATCCGGAATAACGCTGGCTAACC
GTGCCGGGTGGATAGACACACTGATGTCACCGAAAGGCATGATGCCAGGAGCGGTTATTGGCGGTATTGC
CGCGGCTGTCTATGGTCTGGGTAAAGCCTGGTATGACGGTCAGAAGGAGGGGGAAGAATTTAACCGCCAG
CTGTCGCTGACGGGGCATTATGCCGGAGTCACTGCCGGGCAGCTGTGGACGCTCAGTCGTGCTATTTCCG
GGAATGGTATCACGCAACATGCTGCAGCCGGTGCGCTGGCTCAGGTGGTGGGGAGTGGTGCATTTCGTGG
AAACGATATCGGTATGGTGGCGAGAGCTGCCGCACAGATGGAGCGATCGGTTGGCCAGTCGGTCAGCGAT
ACCATAAATCAGTTTAAGCGGCTGAAGGATGATCCTGTAAATGCCGCGAAGGCTCTGGACAATGAGCTGC
ATTTTCTTACTGCCACTCAGCTTGAGCAGATACGCGTCCTTGGGGAGCAGGGGCGGTCCAGTGATGCTGC
ACGGATAGCCATGTCTGCACTGGCAGAGGAAACCGGTCGGCGTACTGCGGATATTGATAATAACCTCAAT
GCGCTTGGCAGTACGCTGAAGTATCTGTCTGATTTGTGGAGTCGTTTCTGGGATGCGGCCATGAATATTG
GTCGTGAAGACTCGCTGGATGAACAGATTGCCGCTTTACAGGAGAAAGTGTCGCGGGCGAAAAGACTCCC
CTGGACGGCATCATCTTCTCAGGTTGAATACGATCAGCAGCGTCTTAACGATCTTCAGGAGAAAAAACGC
CAGAAGGATTTGCAGGATGCAAAAGAGCAGGCAGAGCGGAATTATCAGGAGCAACAGAAACGCCGTAATG
CTGAAAATGCTGCACTGAACCGGATGAATGAAACGGAAGCAGCACGACATCAGCGTGAAATAGCGCGTAT
TAATGCCATGCAGTACGCCGATCAGGCTGTCAGGGATGCGGCGATACAACGTGAAAATGAACGTTACGAG
AAAGCCCTGGCATCCGGTAAGAAAAAAACACGCGAAACCCGTAATGATGAGGCCACCCGGTTATTGCTGC
AGTACAGTCAGCAACAGGCACAGGTGGAAGGACAGATTGCTGCTGCCAGACAGTCAGCAGGCATTGCCAC
GGAAAGGATGACAGAAGCGCGTAAACAGCTTCTGGCTCTGCAGCAGCGCATCAGCGACCTGGACGGGAAA
AAACTGACGGCAGATGAAAAGAGTGTGCTGGCCCGTAAAGATGAACTGATTCAGGCACTGACGCTGCTGG
ATGTAAAACAGCAGGAGCTTCAGAAACAGACGGCACTCAACGAGCTGAAGAAAAAAACAATTCAGCTGAC
CAGTCAACTGGCTGAAGAAGAGCGCGCTCAGCGTCAGCAACATGACCTGGATATCGCCACGGTGGGTATG
GGTGATCAGCAGCGACAGCGATATCAGGTACAACTGAGTCTTCGCCAGAAATACCAGCAACAGCTGGAGC
AGTTGAGGCGGGATAGTGAGCAGAAAGGGACATATAACACGGATGACTACAGAAAGGCCGAGCAGGCGCT
GACGGAGAGCCTGAACCGACAACTGAATGAGAATCGCCGTTACTGGCAACAGCTTGAAGTTGTACAGGGT
AACTGGAAAAACGGAGTCCTGCGTGCATTTCAGGATTTTACCGTGGATGCAGATAATACGGCAGAAACAG
CAGAACAGGTGTTCTCGTCAGCCTTCAGCAACATGGGAAATGGCCTGGCAACTTTTGTCACTACCGGCAA
ACTCAATTTCAAATCCTTCACCTCTTCTGTGCTGTCAGATATGGCGAAAATCCTGGCGCAGGCAACCATG
ATGAAATCGATAAAAGGGATTGGCAGTGTACTGGGATTTGATCTCAGCAGCCTTTCCCTGAATGCCAATG
GGGGGATTTATCAGTCTGCTGATTTGAGTCGTTACAGTGGCACGGTGGTTAACCGTCCGACGTTTTTTGC
TTTTGCAAAAGGCGCGGGTGTGATGGGGGAAGCGGGACCTGAAGCCATTCTGCCATTGCGTCGTGGTGCT
GACGGTAAGCTGGGGGTTGTGGCGGATATTGGGGGTTCAGGTATGGCGATGTTTTCCCCGCAGTACAACA
TCGAGATCAATAACGATGGCACGAACGGGCAGATAGGTCCGGCTGCCCTGAAGGCGGTTTATGACCTCGG
GAAAAAAGCGGCAGCGGACTTTATGCAACAGCAGGCCCGTGATGGTGGTCGGTTAAGTGGAGCATATCGG
TAATGGAGACGTTTCACTGGAAAGTGCGCCCGGATATGAATGTGGTATCAGAGCCGAAAGTGGTGACAGT
GAAGCTGGGCGATGGTTATGAACAGCGTCGTGCGGCGGGACTGAATAACCAGTTGTCGACTTACAGCGTG
ACGATACGTGTTCGTAAATGTGAACACCCATCTTTAAAAGCCTTTCTGGAACGGCACGGTGGCGTCCGTG
CATTTCAGTGGACGCCACCTTATGACTGGAAACCGATCAGGGTGGTTTGTCGTAAATGGTCGGCAAGCGT
GGGGGCGCTGTGGGTAACCATAACGGCAGATTTTGAACAGGTCGTGGCATAGGAGGCTCTGATGCAGGAT
ATTCCACAGGAAACACATCATGAGACGACACGCCTCACTCAGTCAGCCCAGGCGGTGCTCTGGGAAATCG
ATCTGACAGAGGTCGGTGGTGAACGTTATTTTTTCTGTAATGAGCAGAACGAAAAAGGTGAGCCGGTTAC
CTGGCAGGGGCGGCAGTATCAGGCATACCCCATTCAGGGGACGGGATTTGAACTGAACGGCAAGGGCAGT
TCTGCCCGTCCGACACTGACGGTTTCTAACCTGCACGGCATGGTCACGGGGATGGCGGAAGACCTGCAGA
GTCTGGTCGGCGGAACGGTGGTCCGGCGTAAGGTTTACGCCCGTTTTCTGGATGCGGTGAACTTCGTCAA
CGGAAACAGCGACGCCGATCCGGAGCAGGAGGTGATCAGCCGCTGGCGCATTGAGCAGTGCAGCGAACTG
AGCGCGGTGAGTGCCTCTTTTGTACTGTCCACGCCGACGGAAACGGACGGCGCTGTTTTTCCGGGACGTA
TCATGCTGGCCAACACCTGCACCTGGACCTATCGCGGCGATGAGTGCGGTTATCACGGTCCGGCGGTCGC
GGATGAATATGACCAGCCAACGTCCGATATCACGAAGGATAAATGCAGCAAATGCCTGAGCGGTTGTAAG
TTCCGCAATAACGTCGGCAACTTTGGCGGCTTCCTTTCCATTAACAAACTTTCGCAGTAAATCCCATGAC
ACAGACAGAATCAGCGATTCTGGCGCACGCCCGGCGATGTGCGCCAGCGGAGTCGTGCGGCTTCGTGGTA
AGCACGCCGGAGGGGGAAAGATATTTCCCCTGCGTGAATATCTCCGGTGAGCCGGAGGCGTATTTCCGTA
TGTCGCCGGAAGACTGGCTGCAGGCAGAAATGCAGGGTGAGATTGTGGCGCTGGTCCACAGCCACCCCGG
TGGTCTGCCCTGGCTGAGTGAGGCCGACCGGCGGCTGCAGGTGCAGAGTGATTTGCCGTGGTGGCTGGTC
TGCCGGGGGACGATTCATAAGTTCCGCTGTGTGCCGCATCTCACCGGGCGGCGCTTTGAGCACGGGGTGA
CGGACTGTTACACGCTGTTCCGGGATGCTTATCATCTGGCGGGGATTGAGATGCCGGATTTTCATCGCGA
GGATGACTGGTGGCGTCACGGTCAGAATCTCTATCTGGATAATCTGGAGGCCACAGGGCTGTATCAGGTG
CCGTTGTCATCAGCACAACCGGGCGATGTGCTGCTGTGCTGTTTTGGTTCATCGGTGCCGAATCATGCCG
CCATTTACTGTGGTGATGGCGAGCTGCTGCACCATATTCCTGAACAACTGAGCAAACGAGAGAGGTATAC
CGACAAATGGCAGCGACGCACACACTCCCTCTGGCGTCACCGGGCATGGCGCGCATCTGCCTTTACGGGG
ATTTGCAACGATTTGGCCGCCGCATCGACCTTCGTGTAAAAACGGGGGCCGAAGCCATCCGGGCGCTGGC
CATGCAGATCCCGGCGTTTCGTCAGAAGCTGAGCGACGGCTGGTATCTGGTACGGATTGCCGGGCGTGAT
ACAGGTGAAAATGAATTATCTGCCCGTCTTAATGAGCCGCTGGCAAATGGTGCCGTGATCCACATCGTGC
CGCGCCTGGCGGGTGCTAAAAGTGGCGGTGTGTTTCAGGCAGTGCTGGGTGCGGCGCTGATTGCGGTGGC
ATGGTGGAACCCTGTGGGCTGGCTGGGGGCCGCGGCTGTATCGGGTATGTATGCAGCAGGGGCCAGTATG
ATCCTGGGTGGTGTGGCGCAGATGCTGGCACCGAAAGCCAGAACTCCCCGTACACAGACAACGGATAACG
GCAAACAAAACACCTATTTCTCCTCACTGGATAACATGGTTGCCCAGGGCAATGTTCTGCCCGTTCTGTA
CGGTGAAATGCGCGTGGGATCACGTGTGGTTTCTCAGGAGATCAGCACGGCAGACGAAGGGGACGGTGGT
CAGGTTGTGGTGATTGGTCGCTGATGCAAAATGTTTTATGTGAAACCGCCTCCGGGCGGTTTTGTCGTTT
ATGGAGCATGACGAATGGGTAAAGGAAGCAGTAAGGGGCATACCCCGCGCGAAGCGAAGGACAACCTGAA
GTCCACGCAGCTGCTGAGTGTGATCGATGCCATCAGCGAAGGACCGATTGAAGGTCCGGTGGATGGATTA
AAAAGCGTGCTGCTGAACAGTACGCCGGTGCTGGACAGTGAAGGTAATACCAACATCTCCGGTGTCACGG
TGGTGTTCCGGGCCGGTGAGCAGGAGCAGACACCGCCGGAGGGATTTGAATCCTCCGGTTCTGAGACGGT
GCTGGGTACGGAAGTGAAATACGACACGCCGATCACCCGCACCATCACGTCGGCAAACATCGATCGTCTG
CGCTTTACTTTCGGTGTGCAGGCACTGCGGGAAACCACCTCAAAGGGGGACCGGAATCCGTCGGAAGTCC
GCCTGCTGGTTCAGATACAGCGTAATGGTGGCTGGGTGACGGAAAAAGACATCACCATTAAGGGCAAAAC
CACGTCGCAGTATCTGGCCTCGGTGGTGGTGGATAACCTGCCGCCGCGCCCGTTTAATATCCGGATGCGC
AGGATGACGCCGGACAGCACCACAGACCAGCTGCAGAACAAAACGCTCTGGTCGTCATACACCGAAATCA
TCGATGTGAAACAGTGCTACCCGAACACGGCACTGGTTGGCGTGCAGGTGGACTCGGAGCAGTTTGGCAG
TCAGCAGGTGAGCCGTAATTATCATCTTCGCGGGCGCATTCTGCAGGTGCCGTCAAACTATGATCCGGAA
AAACGCACTTACAGCGGCATCTGGGACGGAACGTTAAAACCGGCATACAGCAACAACATGGCCTGGTGTC
TGTGGGATATGCTGACCCACCCGCGCTACGGCATGGGGAAACGTCTTGGTGCGGCGGATGTGGATAAATG
GGCGCTGTATGTCATCGGCCAGTACTGCGACCAGTCAGTACCGGACGGCTTTGGCGGCACGGAGCCGCGC
ATCACCTGTAATGCGTACCTGACCACGCAGCGCAAGGCGTGGGATGTGCTCAGTGATTTCTGCTCGGCGA
TGCGCTGTATGCCGGTATGGAACGGGCAGACGCTGACGTTCGTGCAGGACCGGCCGTCGGATAAGGTGTG
GACCTATAACCGCAGTAATGTGGTGATGCCGGATGATGGCGCGCCGTTCCGCTACAGCTTTAGCGCCCTG
AAAGACCGCCATAATGCCGTTGAGGTGAACTGGACTGACCCGGACAACGGCTGGGAGACGGCGACAGAGC
TTGTGGAGGACACGCAGGCCATTGCCCGTTACGGTCGTAACGTCACGAAGATGGATGCCTTTGGCTGTAC
CAGTCGGGGGCAGGCACACCGTGCCGGGCTGTGGCTGATTAAAACGGAACTGCTGGAAACGCAGACCGTG
GACTTCAGCGTGGGCGCAGAAGGGCTTCGCCATGTACCGGGCGATGTCATTGAAATCTGTGATGATGACT
ATGCGGGGATCAGCATCGGTGGGCGTGTGCTGGCGGTGAACAGCCAGACCCGGACGCTGACGCTCGACCG
TGAAATCACGCTGCCATCCTCCGGCACCACGCTGATAAGCCTGGTTGACGGAAGTGGCAATCCGGTCAGC
GTGGAGGTTCAGTCCGTCACCGACGGCGTGAAGGTAAAAGTGAGCCGGGTTCCTGACGGTGTTGCTGAAT
ACAGCGTGTGGGGGCTGAAGCTGCCGACGCTGCGCCAGCGCCTGTTCCGCTGCGTGAGTATCCGTGAGAA
CGACGACGGCACGTATGCCATCACTGCCGTGCAGCATGTGCCGGAGAAAGAGGGCATCGTGGATAACGGG
GCGCACTTTGACGGTGACCAGAGCAGCACGGTGAATGGTGTCACGCCGCCAGCGGTGCAGCACCTGACCG
CCGAAGTCTCCGCAGACAGCGGGGAATATCAGGTGCTGGCGCGATGGGACACGCCGAAGGTGGTGAAGGG
TGTGAGCTTCCTGCTTCGCCTGACCGTGGCAGCGGATGACGGCAGTGAGCGGCTGGTCAGCACGGCCCGG
ACGACGGAAACCACATACCGCTTCACGCAGCTGGCGCTGGGGAACTACAGGCTGACAGTCCGGGCGGTAA
ATGCGTGGGGACAGCAGGGCGATCCGGCGTCGGTATCGTTCCGGATTGCCGCACCGGCAGCGCCGTCACA
GATTGAGCTGACACCGGGCTATTTTCAGATAACCGCCACGCCGCATCTTGCGGTTTATGATCCGACGGTA
CAGTTTGAGTTCTGGTTCTCGGAAACGCGGATTGCGGATATCAGGCAGGTTGAAACCAGCGCGCGTTATC
TTGGTACGGCGCTGTACTGGATAGCCGCCAGTATCAATATCAAACCGGGCCATGATTATTACTTTTATAT
CCGCAGTGTGAACACCGTTGGCAAATCGGCATTCGTGGAGGCCGTCGGTCGGGCGAGCGATGATGCGGAA
GGTTATCTGGATTTTTTCAAAGGCAAGATAACCGAATCTCATCTCGGCAAGGAGCTGCTGGAAAAAGTCG
ATCTGACGGAGGATAACGCCAGCAGACTGGATGAGTTTTCGAAAGAGTGGAAGGACGCTAACGATAAATG
GAATGCCATGTGGGGCGTCAAAATTGAGCAGACCAAAGACGGCAAACATTATGTCGCGGGTATTGGCCTC
AGCATGGAGGACACGGAGGAAGGCAAGCTGAGCCAGTTTCTGGTTGCCGCCAATCGTATCGCGTTTATTG
ACCCGGCAAACGGGAATGAAACGCCGATGTTTGTGGCGCAGGGCAACCAGATATTCATGAACGACGTGTT
CCTGAAGCGCCTGACGGCCCCCACCATTACCAGCGGTGGAAATCCACCGGTATTTTCCCTGACATCAGAC
GGAAAGCTGACCGCTAAAAATGCGGATATCAGTGGCAGTGTGAATGCGAACTCCGGGACGCTCAACAACG
TCACGGTAAATGAAAACTGTACGATTAAGGGCATGCTGGAGGCGACTCAGGTCAGAGGTGACTTCGTTAA
AGCTGTATCCAAATCATTTCCGAAACAGGCTGGTACGTGGGGTAACACGGAAACACCAAACGGGACGGTT
ACAGTCACCATCAGCGATGATCATAACTTTGACCGTCAAATCATTATTCCGCCCATTATCTTTAACGGAA
TAGCGTATAGCGATCCGGGAAGTGGTAATAACCCGGGAGGTACAAGATACACGGGTTATGGTTTTGAAGT
TCGCAAAAACGGTGTATTAATCGCATCCAGAGAAACTAAAGGGGCCATTCCCGGTAGCTACAGTGCGGTT
ATTGATATGCCGAGTGGCAGGGGAAGCGTCACTCTGGAGTTTAAGGTTTTCCATAAAGGCAATCAGCGGG
CAGGTAATATCACCGACTGTACGGTGATTGTGACCAAAAAAGCGGCTTCCGGCATCAGTATCCGTTGAAA
TATTTATAACCCTAATAACGGGCGCCAGAAATGGCGCCTTTTTTATTGCAGAAAATCGGGAGGTAATTAT
GCGTAAAGTTTGTGCAGCAATTTTGTCCGCAGCCATTTGTCTGGCCGTATCCGGTGTGCCTGCATGGGCG
TCTGAGCATCAGTCCACGCTGAGCGCAGGATATCTTCATGCCAGTACGGACGCTCCCGGCAGCGATGATC
TGAACGGGATTAACGTGAAATACCGTTATGAGTTTACGGACACACTGGGGCTGATTACGTCCTTCAGTTA
TGCCAACGCCGAAGATGAGCAAAAAACGCATTACAGCGATACCCGCTGGCATGAGGATTACGTGCGTAAC
CGCTGGTTCAGCGTGATGGCAGGGCCGTCTGTGCGTGTGAATGAATGGTTCAGTGCGTATGCGATGGCGG
GTGTGGCTTACAGCCGTGTGTCGACTTTTTCCGGGGATTATTTCCGCGTAACTGACAACAAGAGGAAAAC
GCACGACGTGCTGACCGGAAGTGATGACGCTCGCTACAGCAACACATCTCTGGCGTGGGGGGCTGGCGTG
CAGTTTAACCCGACCGAATCAGTGGCCGTTGATGTCGCTTATGAAGGCTCCGGCAGCGGTGACTGGCGCA
CTGACGGTTTCATCGTGGGTGTCGGTTATAAATTTTGATTAGTAACACAGCGTTATGACAGCCCGCCGGT
TCAGGCGGGCTTTTTTGTGGAGTGGGTATGGCAGCAGTACAAATATCAGGCGTGCTGAAAGATGGTGCGG
GAAAACCAATACAGAACTGCACCATTCAACTGAAAGCCAGACGTAACAGCACCACGGTGGTGGTGAACAC
GGTGGCCTCTGAAAATCCGGATGAGGCAGGGCGTTACAGCATGGACGTCGAGTATGGTCAGTACAGCGTC
ACTCTGTTGGTGGAGGGATTCCCGCCATCACATGCCGGGACCATCTCCGTGTATGAAGATTCTCAACCGG
GTACGCTGAATGATTTTCTCGGTGCCATGACGGAGGATGATGCCCGTCCGGAGGCACTGCGTCGTTTTGA
ACAGATGGTGGAAGAAGCAGCGCGTCACGCAGAGGAGGCGAAGAAGAATGCCGGAGAAGCAGAGACGTCC
GCGAGGAATGCCGGCATATCAGCCAGTAAGGCGGAAGCGAGCGCCGCAAATGCTGATACTTCAGCAGAGG
ATGCATCGGAGTCAGCCCGGCAGGCGGCAGAAAGTGCAGCCTCTGCAAAGAAGTCAGAGGAAGCGTCCTC
GTCCTCAGCCTCTGAGGCCGCTCAAAAAGCCAGTGAGTCATTACAAAGTGCAACAGATGCCGAGTTGTCA
AAAAAGACGGCAGAAAGTGCAGCCGGTAATGCAGCCAGGGATGCAACGACCTCAACAGAAAAAGCCCGGG
AATCAGCAGAAAGCGCACAGTCAGCGGAACAAAGCAGAATAGCGGCGGAAGACGCCGTAAACAGAATTCC
CACCGTGGTGGGGCCTCCCGGACCAAAGGGGGAACCGGGTCCCGCGGGTCCTCAGGGGCCGAAGGGAGAT
AAAGGAGAGCGTGGAGACACCGGTCCGGCAGGGGCAACCGGTGAACGGGGACCGGGAGGAGATACAGGTC
CGGCAGGTCCGCAGGGGCCGAAAGGCGACAGGGGAGAGCGGGGAGAGACCGGTCTGACAGGAAGTACAGG
TCCACAGGGGCCAAAGGGAGATACCGGGGCAACAGGTCCGGCAGGACCGCAGGGACCGAAAGGGGAAACA
GGTGCGGCTGGCCCGGTGGGGGCTACCGGACCTCAGGGGGCGAAGGGCGACCCGGGGGAGACACAAATAC
GGTTCCGTCTGGGGCCGATGAGAATTATTGAGACAAACAGCTATGGCTGGTTCCCGGGTACAGATGGTGC
GCTCATCACCGGACTGACCTTTCTTGACCCCAAAGATGCCACACAGGTTCAGGGGATGTTTCAGCATTTG
CAGGTCAGATTTGGTGACGGGCCATGGCAGGATGTTAAGGGACTGGATGAAGTGGGCAGTGATACAGGCA
GAACTGGAGAATGACATGAATATTTTGAGAAAGCTTATGCAGAGTCTGTGCGGTTGCGGAAAGCATGATG
ACTGTGAAAACGGACGGTCACTTACAGCACAATTGCGACTGGGACCGGCAGACATTCTGGAGTCAGATGA
GAATGGCATTATTCCGGAGCAGGACAGGGTAATCACACAGGTGGTGATACTGGATGCAGATAAAAAGCAG
ATACAGTGTGTGGTAAGACCGCTGCAAATCCTGCGTGCTGACGGGACGTGGGAAAATATTGGCGGGATGA
AGTAACCCGACAGCTTCACAAAACCGGAGTCCGGCTCCGGTTTTTGTTGTCATGTCCGGTGGATGTTTGT
TAGGAAAGCAAAGATGGCAAAACTGCTGGAGGTTTTGTGGTTGAGTATGCCAATATAATTAATAGATTAA
AGAGTTAGTTGTGAAGAAAATATGGATAAACAGGACGACGAATGCTTTCACCGATAAGGACAACTTTCCA
TAACTCAGTAAATATAGTGCAGAGTTCACCCTGTCAAACGGTTTCTTTTGCAGGAAAGGAATATGAGTTA
AAGGTCATTGATGAAAAAACGCCTATTCTTTTTCAGTGGTTTGAACCTAATCCTGAACGATATAAGAAAG
ATGAGGTTCCAATAGTTAATACTAAGCAGCATCCCTATTTAGATAATGTCACAAATGCGGCAAGGATAGA
GAGTGATCGTATGATAGGTATTTTTGTTGATGGCGATTTTTCAGTCAACCAAAAGACTGCTTTTTCAAAA
TTGGAACGAGATTTTGAAAATGTAATGATAATCTATCGGGAAGATGTTGACTTCAGTATGTATGACAGAA
AACTATCAGATATTTATCATGATATTATATGTGAACAAAGGTTACGAACTGAAGACAAAAGAGATGAATA
CTTGTTGAATCTGTTAGAGAAAGAGCTGAGGGAAATTTCAAAGGCGCAGGATTCTTTGATTTCTATGTAT
GCAAAGAAAAGAAATCATGCATGGTTTGATTTCTTCAGAAATTTAGCCTTATTAAAAGCAGGAGAGATAT
TCAGGTGCACATATAATACAAAGAATCACGGTATTTCATTCGGGGAGGGGTGTATCTATCTTGATATGGA
TATGATACTTACAGGTAAGCTTGGTACAATATATGCTCCTGATGGAATTTCAATGCATGTGGATCGTCGT
AATGATAGTGTAAATATTGAAAATAGTGCAATAATTGTTAACCGTAGTAATCATCCTGCTCTACTTGAGG
GACTTTCTTTTATGCATAGTAAAGTAGATGCTCATCCATATTATGATGGTTTGGGGAAAGGAGTTAAGAA
ATATTTTAATTTTACACCATTACATAATTATAATCATTTTTGTGACTTTATTGAGTTTAACCACCCTAAT
ATAATCATGAACACAAGTCAGTATACATGCAGTTCATGGTAAATGAATTTGATATAGTTTATTTTGTTGT
AATAAATGATTTGCAGGGTATTAGATATAAACATGAAAATTCCCTCATTACAGTCCAACTTCAACTTTTC
CGCCCCGGCAGGATACTCTGCTCCCATTGCTCCTAATCGTGCTGAAAATGCCTATGCGGATTACGTTTTG
GATATAGGTAAGCGAATACCACTTTCCGCAGCAGATTTAAGCAACGTATACGAAAGTGTAATACGCGCCG
TCCATGACAGCCGTAGCAGGCTTATCGATCAGCATACAGTCGATATGATCGGCAACACTGTACTTGATGC
TTTGAGCCGATCACAGACATTTCGTGATGCCGTAAGCTATGGCATTCATAATGAGAAGGTACACATTGGT
TGCATTAAATACAGAAACGAATACGAGCTTAACGAAGAATCTTCTGTCAAAATTGATGATATTCAATCAC
TAACCTGTAACGAATTATATGAATATGATGTCGGGCAAGAGCCAATTTTCCCCATTTGCGAAGCAGGAGA
AAACGATAACGAAGAGCCTTATGTCAGTTTTAGTGTTGCGCCAGATACTGACTCTTATGAGATGCCATCG
TGGCAGGAAGGACTGATTCACGAGATTATTCATCATGTTACTGGATCTAGCGATCCATCTGGAGATAGTA
ATATAGAGTTAGGACCCACCGAGATTCTCGCACGTCGTGTCGCTCAAGAACTGGGATGGAGTGTTCCCGA
CTTCAAAGGATATGCAGAGCCAGAACGTGAAGCTCATCTTAGGCTACGTAACCTGAATGCCCTTCGACAG
GCTGCCATGAGGCATGAAGAGAATGAGAGGGCTTTCTTCGAAAGGCTGGGTACGATCAGTGACCGATATG
AGGCGAGTCCTGATTTCACAGAGTATTCCGCTGTGTCTAACATAGGATACGGATTTATCCAGCAACATGA
TTTTCCTGGATTGGCTATCAACGATAATTTACAGGATGCAAATCAGATCCAACTGTATCATGGCGCCCCT
TATATTTTTACATTTGGGGATGTGGACAAACACAATCAGCAATGATTCGTCTTTGCAGTGACATAAGGTT
ACTATTCATACATTTTAACGGAGTTGATGATGGGTAATCGTGCAACATTGTATGTAAAGGCAATTCCCCT
AATTTTACTGTAGTAAGTGAACATGGCCGGAACGAGACTATCAGCATCATCGGCTTCGGCCCAGTAAAAA
GAGGCTCGGAAAAATGCACAATAGGCATCACACGTCATGCATGGATTCAAATTGTACATAATTCAACAGT
ACAGCTATAAATCGTAAAGAAACTGCAGTACGTTGTGCACAGAAAAGTACCGTGATTCACTATTGTACAG
GTCCATTGCAGCAACAATATTTTGTGAATTTTGCGTGAGAGAAAGAAAAGGAATAATTTGTATATAAACA
ATTGATTAATCAATTGCTGGAAAATAAATAAAACTGATAATTAAAGGCTTAAAGCTTGTATTAAATCATA
TTTAAAATTTTTTGTTTTAAATGCAGCGTGTTATTGTGTTTTTTTTAATCTATCGGTCTGGTACTTGTAA
TCAGTGAGTATATCGCACCACTTCAGGATGCTGCAGATTTAGATATTGCGACGGATGAGCAGACATCGTT
ACTGGCGGCATGGAAGCAGTATCGTATGCCGCTCAATCATGTTGATACGTCTGTATCTCCAGATATCGAG
TGACCGGTAATACCTGCGTTATAGTTCGTAAACGTTCGTTTGATGGGATGCTGGAAGGATGAATTAGTTG
CCAGATACAAAAAGCAAGAGTTCATTTCTAATTTTTGTTGCCATGTTAGGGGGGATGTTTGTTAAGGAAA
TTTAGATGGGTTTATTTTGAAGGTTGAAATGTATGTTATCGCCATATTCTGTAAATTTGGGATGTTCATG
GAATTCTTTAACCAGAAACCTGACTTCGCCTGATAATCGTGTTTTATCCTCTGTAAGGGATGCTGCCGTT
CATTCTGATAATGGGGCGCAAGTAAAGGTTGGCAACAGAACATATCGTGTTGTTGCCACCGATAATAAGT
TTTGCGTTACAAGAGAAAGTCATAGTGGTTGTTTTACTAATCTGTTGCACAGGCTGGGATGGCCTAAGGG
GGAGATTAGCAGGAAAATTGAGGTCATGCTGAATGCATCACCAGTGAGCGCTGCTATGGAAAGAGGCATT
GTTCATTCGAACAGACCTGATTTACCTCCTGTTGATTATGCACCGCCAGAGTTACCGAGTGTGGACTATA
ACAGGTTGTCAGTACCTGGTAATGTTATTGGCAAAGGGGGGAACGCTGTAGTATATGAAGATGCTGAGGA
TGCAACAAAAGTCCTGAAGATGTTTACTACATCTCAAAGCAATGAAGAGGTGACAAGCGAAGTTCGTTGC
TTCAACCAATATTATGGTGCCGGGAGTGCAGAAAAAATATATGGCAATAATGGTGATATTATTGGTATTA
GAATGGATAAAATAAATGGAGAATCGCTTTTAAATATTTCGTCCTTGCCAGCACAGGCTGAGCATGCTAT
TTACGATATGTTTGATAGACTGGAGCAAAAAGGAATTCTTTTTGTCGATACAACAGAGACAAATGTCTTA
TATGACCGCGCGAAGAATGAGTTTAATCCAATAGATATATCATCTTATAATGTTTCCGACCGTTCATGGA
GTGAAAGTCAAATAATGCAATCTTATCATGGCGGAAAGCAAGATCTTATTAGTGTGGTATTAAGTAAAAT
TTAG
>3 1159810-1186416
TTAAATACATTTTACCGGTTTTGGCAGGCCAGCAATTTTGGTGGCTTGCTTAGCCGGACCTTTCGGAAAC
AGTCGGTATAAATAGCGGCTGTTACCTTTTTCTTCGCCAAATTTATTCGCCATCGCTTTTACCAGCATAC
GAATCGCCGGAGAAGTATTGAATTCCAGATAGAAATCACGCACAAAACGCACCACTTCCCAGTGTTCTGG
CGACAGCGAAATCCCTTCGTTCTCTGCAATCACCACTGCCAGCGGCTCACTCCACTGGCTGCTTTCTTTG
AGATAGCCTTCGGTATCCGTTTCTATCTCTTTACCTTCGAAGATCAGCATAATTATTACTACCTTAATCA
GACTGCCGGCAGTGTAACAAAAAACAAAGCCCCGCATAAAGCGAGGCTATGAAAGTGTTAGCGGGTGAGA
TTAATCGCGGCTGGCGAAGCCCAGAATGCTCAGCAGGCTGACGAAGATGTTGTACAGCGAAACATACAGG
CTAACCGTGGCACGAATATAGTTCGTTTCACCGCCATGAATGATGTTGCTGGTTTCAAACAAAATAGCGC
CAGAGGAGATCAAAATGAAGACCGCGCTGATCGCCAGATGCAGAGCAGGCAGCTGCAGGAAGATATTAGC
AACCATACCAATCAGCACCACCACAATACCCGCCATCAGCATACCGCCGAGGAACGACATATCTTTGCGG
GTGGTCAGCACATATGCAGAGCAGCAGAAGAACACTAACGCCGTTCCGCCCAGTGCCATAGCGATTACGT
CACCCATTCCGGCAGACAGATAGGTATTCAGAATTGGTCCGAGGATATAACCCAGAAAACCGGTAAAGGC
GAATGCGGAGATAATCCCGGTCGGCTTATTCGCCATTTTATAGGTCAGGAACATCAAACCATACATACCC
ACCAGCGTCAGAATCAGACCCGGAGATGGCAGCATCAGCACCGTACTGGCAGTTGCGGTAATCGCCGAAA
AGGCCAGCGTCAGGCTCAGCAGAAAATAGGTATTACGCAGCACTTTATGGGTGCTAAGCAGTGATGTACG
GTCATGTGAAGAACTAACAATACGATCCATTGAGTCACTCTCTATGACAGATGTAATTAATTAAGCAGCA
TAATGATAATGCGTAAGGGCACCCAGTAGTTTTACCCATCTTTACGCATTTGATCTGGAACAGGTTTAAC
AGCGGATTATCAGGTCATTAAGCAAATATAACGCCCTGAGAATTTCGGCAGGCAAAAGAAAAAGGGGTTA
GCATTTAGCTAACCCCTTATCTTATCTGGCGGAAGCGCAGAGATTCGAACTCTGGAACCCTTTCGGGTCG
CCGGTTTTCAAGACCGAAGAAAAACAAATAAAAATCAGTGTAATACGTGAAATTGCTGAAAAGTTAATCA
AATTTAACACCAAGAAAAATCAAGGTATTAGGAAGTTGCTCATAGCTAGTATACCAAGTCTTTTTGCCAG
AAATTTTTCTGGATTGTCTACTTGCTAACCACGAGCGGCAAATCCAGTGTTGGTGTGATTTTTGTTTTAC
GATCGTAAATCAACACCTGATTTTCTGTTTTATGCCCGCTGAAAATTTGTTTGTCGCGACTGCTGCCTTC
GTAATCTGAGATCCCCTTGGCTTTTATGTCGTGAAAATTGCACCCGAACGGAACGCCAACTTTTTGCTCG
GCTGCGCGTTTAGCCTGATTCCACCAGTTATTCAGCGTTTTAGCTATGACTTTCCCGCCTTTGGTTGTAT
TGATCACATATTCGCATGTACAGGAAGATACATTTCGGGCTAACTGGATCGCTGTACGTAATCGCGGTGA
CCATTCCTTGATTTGTTTGGTGCCGGTTTTGTTTTGCTCAATGTAGATCCCTTTATCCATAATATCCTGC
CATTTCAACTCAAGCACATCACCGAGTCTTGCCGCACAGAGATAGGAAATCTCCATTGCAATGCGTAACT
GTGGAATTGCTTCCGCATATATCGCCGCATACTGTTCATCGGTGATGTAAACAGTGCGGGCTTTAAGAGA
GAATTTTCTGACTCCTTTGCATGGGTTATTCTTCACATACCCACGCTCATATCCCCACCCGTATACTCGA
CTCAGGCTTGCCAGTTCATGATTTGCCTGGGTCTTGCTCTCAAGCCCTCGTTTATCCATGAAAATTCTTA
CCTGCTCAGTTTTGACATTATCAGCAAGCACTTTTCCGAATACCATCAGCAACGCCTTCTGATGTTGTCG
ATAATCTTTTTGGGTTCGGGGGGCCAGTTCTGTAAATGCAGGGGAGTCCATAAACATGTGCCACAATTTA
GCTACGGTCATTATGTTGTGGAGTTTTGCTTTTTCCAGTTCATAATTTTGCCAGACTTTAGCTACGCTGG
TTTTCCGCACTCTTCCTAGCCCTATACTTCTTGTACTTCCTTCGGGTTTCCACACGTAACTGTAACCATT
CGATCTAACCCGCGGTGGCAGTACATTATCTTTTTTATTTTTTCTTGGTCTTCCCATTGTTCAGCGCCTC
AAAATCGGGTTCAGCAGAAACCAGTTCAGATGTTTTTGGCATCGTTGTCAGACCGTGTGGAATATCCCTG
CGGAGAACTATGGGTTCGTTTTTAGGGCCGATTACAAATGGGATGCCGTGCAGTCTTAACTGGTGTTGCT
GTTTTGTGTATCGCTCGTATTTCGTGATCTCTTTAATCTCTGCTGGAGATAGAGTTAATTCGTACATGTG
GTCACGTGCCTTTACAGCATGACCGCGGCCACTATAGCTGGTGGGCGGCGATATGGGTTGAACATCAAAA
ATCAGCCTGACTCGGGAGCAGTTTTTGCCAGATGGCTGAAACGTATTTCGCCTGGTAACGTGCATCGTGC
AGGGCGTTATGGCGTTCACCTTCGAATGGAATAGTCGTTCTTGCGTCGAAATCCATCACCAGTCCCAGAG
CAACCATCGTTCTTACATCGCGATCATTGGTGTAACGCCACGGGCAGGGGATCCCCTGCCGTTCATATGA
ACGGCGTAAAATCACGTTGTCGAAAGTTGCACCGTTACCCCAGACCTGAACAAAAAATTCACCGGAGTTT
TCGTCGATAAATTCCCGGAATTGCAGCAGTGCATCATCCAACGTGATTTCATCGGTCAGAATGGAGGATT
GTGCTTCGCGTGACTGTTTCAGCCACCACTTAATGGTGTCCCGATCGATGACCCCACCTGCGGTTTCCAG
ATCGATAGTTTTGCTGAATTCTGGCCCCATCTCTCCGGTTGCCGGATCAAAAAACTTACCGGCTATAGAG
TTTATTGGCGCATCAGGATTTTTTCCCATTGTTTCAAGGTCAATCATCAGATGGTGCCACAACCTGCTGG
TGGATGAGATTTCATGATGACCGTTCACTTTAATTAAGGGATTTGCTGTTTCGCCAGTTTTATTATCGCT
GGCGTGATACTGATCGCTGCCAGTGTTCTCCTTGTGCAGATGTTCAGTGCCTTCCATTTCCTCCGGATCA
TTTTTCTGAGCTTCAGCCTGATTCTCTTCATCGAATGTTTCCAGGTAGGTTGCGTTCCCCATCACCGCAC
CACAGTCAGGACAGTTGCCGCCACCGGTCTGACCGCATGCGGTGCAAACTTTTTCCAGTTCCTGTTGCAC
TGCTGGTTCTGGTTGTTGTTCTTCTGGCCCGTTTTGTTGCGTATCCGGGCTGTTTTGTTCCGCTTCTGGC
TCATTTTGTTTCACGTTGGGCTGATTCTGGTCCTCAGCGTCGCGACTCTGGATCCCTTTCACCCATTTCG
GATCATTCGGGTCGCTAATCCCTTCAACAAATTCACCACGTGATGCAGCAAGCAATTTATCGGCGTCAGG
CTGGCTGATATTGGCTGCCTGCATAATTTTGTTTACTTCGTCAGCGGTAACTTTTACCGGCTCTGATTGT
TCGGAATCTTCAGCGGTATCCACATTTTGCGGTAAGCCCGTGTATGTGCCATTTTTTCGGGCAAAATATT
CTTCTTTTGAGATTTCGGTACCGCCGGCAGCCAGCGCCTTGTCCAGACCAGAAAGTTTGTTTGCCCTGCC
GTATTTTTCCCCGCCCTTATCGGTAAAGACGAAATAAAATGGTCCTTCACGCTCTACAGATGGTTCAGCT
TCCACCAGGATTTCATTTTTTTGAGTATCGGATTCTGCCGTCTCCACTGGAGCAGTTTGTGCTGCTGACG
GCTGGAGAGCATCAGTAGAGCTCTGGTCTGTTTCTTCATGTTCAAACACGCCCTTTGTCGTCAGGTATTC
ACTGATATATTTGTTCAGTGCAACGGGATCTTTGTGAATATCGATCGGACGTTCGCGAACAAGGCCAAAA
ATAGTCTGACGGTCATAGCCAAGTGCTTCGGGCTGTTTGCGCATTGATGCTGAGATACGCTTCCAGTCTT
CGCGATCCTTGTCGATAACCTCATTTGTCGCCCAGCGATGGATGGTACCGTCAATGTTTCCTGCATCCAC
ATCACCGGGCCAGAGGGCGCAGGCCAGTTCATTGTCGAGTGTTTTCCATGTCTGTTTGTATTCGCGGCGA
ATGGCAACAGTGACAGCCCCGGTTTTTTCAGCAGCGTTTTCAGTGTTCTGTTGGTTGACTCTGGCGCGGG
TGAGATCAACAACAGACGTGTATTTTCCGGTTTCCTTGCGTTCACCTTCGCGACGTTTTTTCCAGATGCG
CATCTCTGCCTGAATTTCAGGCCATTTAGCGCCAGGCTCACATTTATGCTTAACCCACCCGATGGCATGC
AGTTTAAGTTCAGGATACATGGCGTTAACTTCTGGCATTTTCATCAACGCTTCAACGATATGTCCGCCGA
ATGTTGCCATGTCTTCCTGTAGTAATTCCTGTGCGCTAATCACCATATCAACGGTGATGTTTTCGCATGT
GTCGAATTTAACCAGGACTGCGTTCTGTACTTCAGGGGACAGCTTGTCAAAATTGACGTTCATCGGATCG
GATTCTGGTTCGACCGGTACAAAGGAAGCTGACTCCTCATCCCAGCGGTTTTCCTGCATATATTCGGTAT
CCCAGGAATCGAGGGCAGGGCGGGGTATGCCGGGTTTATCCTCGCAGACAATAAATTTATAAGCGCAGTC
CTGAGCTGCCGGGAATTGCTCCAGAAATTGCCAGTGAAATTTTGCGCGTGCGCGACGCTCATCACCGGCT
TCAATGGCAGTGGCCACCGCAACAGCGCTATCTTCTTTTATGGCCTGTTCGTCAGGAATAGCAGCGCAAA
TAAAGATTTTACTCATTGTGTTTTAACCTCATTACAGATTTAAGGGTGAACAAATCCCTGCCATTGCTGG
CATATAAAAATGAAACCGGATATTAATTACGGTGCTGTTTTAAAGTCCTGCCGGTATTTCGTTATTATTA
GTGTGAGTAGTTTTATCTACCGGATAACAGTTACCGGGAATTTTTTGTTCTGCTGCTGCAGCCATGCATT
CTTTCATTGAACCGTATAAGCCAGTCACCAGCTCAAGAGATTCGCCGGAAACAAGATAAACTGTCAGAAC
GAGTGCAAATGTTGTATTCATTGTTTATATCCTTTTTGCAGCAGGTCCAGACGAGCCAGCATTGAAGGAA
TGCATACTTCATTTAACAGGTCCTGCTCGAGTTTTCTCTGCTTAATGGCGTCTTCAATAAATGTTTTGTC
TCCAGTGATAACGCCAATTTCGAAACGAAGTTCAGACGTGCTGGCATTACATGATAACTTTTCCATTATC
GCGTCCTCAACAATGAATTTTGTGATGCGGTGCCTGGTGCCTCCAGGTGACGTTAACCAGTTAACAATTA
ACGCCGGATACAGAGCATTCTCGTTACTCAGCAAATGACCGCTTTACCGATTTAACTGTTCCGCGTGCGC
TGAGCCGCATTCACCGCATCACAAAATTCACTTTTAAAAAAGGGCGGCAGAGCAGTTACGGAGTAAAACT
GATACCGCCAAATGTCACCAGAATATTGATAACAGAGGGCGTTGCAGCGGGGTTGTCACTTAAGCGTATG
GTCAACCTGACAACCCGGTGTCCTCAACGGGGAAAGAATAACCCCGCCATACTTACCGCCGCGCCATTTC
GCGGATTGCCACAACCGGAAGCGCACGGTCGAATTAAATTTAACGACGGCTCTAAGGGAGAAGGACTTCG
CCGTGCACTTTCGTGTTATGCCCTGACTTTTCAGGGATATATCCTTTCAGTAAACTGTCAGTGCCGGATT
CTTATCTGTGTCCGGCGCACGACCACACGTAGCAGCGTGTTGGTCTCCATTTTTAATTCAGCCCTTAATG
GAGGATAAAATGCCAAACAAACCATGCCCTGCCTGTAACGCTCTTTCTGGCTTTTTAGAGAAGGGCGGTT
ATTACATTTTTAACTGTCCAGAACATGTTGAATTTCATATATCAAAACTTGACAGTATCATTACAAAGCC
AAATCAGTATCAGTCTGATTTACTGAATAAAGAGTTAAACGCCGCCCGAGATTAAGGGCGTAGTGGCCCA
TTAAAAATATTGCAAAGACCAACTATTGTTGAACTGGATTAAACCAGTAATTCTCTATTGCTCTTATTGT
TACCATCGGATGATTGCCGGGGGTTATTTTAAGTTCGGGAGGAAAAGGCTCTCCATCAGCAGCCATCATT
GAGTATGTGAAATCCGCCGACGCAGTCCCTTTCATGATAATTCCGAATTTTTCAAGTAATGAGAGCAGTT
CCGGTAATCCTGTGTCATCTGAATAACTTTCCTCATAGAAAGAAGCGATTGCCGCAGGAGATGACAGTTC
TCGCTCTGCAATTTTTTTGTAGTTTTCCAGAATTCTTTTTTTGAATACTTTTCCTCGACATGAAAACCCA
TCACCGAGGCAATCCGCTTTGCAGTTTCTTCAGTATTCTGGTTGTTTGTTACCGAAACAGAGTACAATCC
GGTAAACGCATCGCGCACATTACGAGCCATATTATCAATGTATTTCTTCGTTGCAGATTCTAATTCAACT
TCGTTCAGACGTTGGTGAAGTGCATGTGCTGCAATTTCCTGGATTTCTTTTAGTAAATCTTTAAATTCCA
TCTTTAACTCCGTTAGTCGTTAGATTTTGCCGAACTGGAAAGCGCCTGTTTAAACTCACTGAAGCTGAGA
GCTTCCTCGCCTTCGGCAAGGCCTTCGAAGTATTCTTCGTAAGCCTTTTCCATGATTGTGTCGAAATCCA
TATCACTCACCTGAGTTTCTTTCCAGCCAGCGACGGGCACCATTTTCGGTTTTAAACGTTTTGCTTTTGG
TATACGTCATCGCGGTGAATGTACCGTCCTGGTTGGGAAACACGCCGTACACCAGAGATTCGTTGTTGCC
AAGATCGATAGTATCCATGTTGACCTCATTTCCCCTTAACGCCGGGTAGCGGAACAAAAACCTGCTGCAT
AGTTATTAAAGTTGAACCCTGCCGTCATGTTCATACGCCTCGGGCTGGCTACTTACCCCCTGACCACTGC
TTGGTAACTCGAAGTATTGCCCGGCGTTCTGTGGGGCGGGGTGGGTGGTTGGTGTATGTAATCTACAATA
AAAAACTGTTTTTGTGTCAACAGTTTTTAATTGTTGTTTTGGGCAAAAAAATCCCTCGAAAGAGGGAGTA
TGAAAATTGTTCAACTCAGATAGAGAAGGGAAATTGTCGCCGAGAATGTGTCACGCTTACAATCTCAATG
CTTGAAGCAGCTACTCTGTACAGGATTATGTAGTTAGGGTGGGTCACGATCTCTCTCAATCCAGAAACCC
GTTCGCTTGGTGGATATAAGTACGGATGCTCAGATAGAGGTAATACCGATGTTTCAATGCGTATTTTTAG
TCTACGTGCTGCCGGTGGGTTCTCCTTGGCGATGTAAGTTATGATCTGGCGCAAATCATCGCGAGCAGAC
GGTAGCCATAAAATGGGTAACATTACTCGCTCTTGTTAGTTACAGCAATTTGAGCAATAAGATTTTCCAT
TTCAGCCATTACCTCGTCATGTGGAATTGCGGGGCGAGTGTCTGCAAGGCTTGACGTTACTTTAGTGCGC
AACCATTCGTTGTAACTGTTTTCTTGTTCGGTAGTTTCGAATTCTGAAACTATCGGAGAAAGGGCTGTAC
CCATGGCATAACTCCTCTTCTTGTACTGTGGTCACGCCCGGCGGCTTTTTTGTGCCGCCAGCCACCTAGC
AATGGTTTCTTCCATTGATTTTTTCTTGTCTTTGATTTCTTGAAGCATTTTTTCTTGGTCTTCCTCAGGA
AACGCACTAAAAGCTTGGAGCAGTTCGCGTTGGCGAGGACCAATTTTCATCGTGTCAGGGGTGAAAATTT
GCTCACACTCTTCAGGAGGCAATAAAAACCAATGCAATGGATGCCCTGAAACCTCAACCAGTTTATCCAA
ACTTGAGGCTTTAGGTGTAGCCTTACCGCTGACCCATTGTTGAACAGTTTGTTGTGTCACACCAATTCTA
CGGGCAAGCTCAGCCTGGCTCCATCCAGTTTCCTGAAGAAGCTTGCTGATTCTGTACATAGATACTTCTA
GGGCGCTCATCATTATTCAATTTTACAGGTAAATACTGTTAAAAGCATCACAATAAAAAACTGTTGATTG
CATACAGTTTTTTATTGTAGGCTTTGCTTATAGTTTTTAGAGGAGGGCAAAATGCTAGATAGCACTCGCG
AAAAAATTAGGCAGAAATACACTCAGGCTGAAATAGGTCGTTATATGGGGGTCGCTCAACAGACTGTTTG
GCAATGGTTTAGCTTTGGCGTTCCCCCAAAGCAGGTAATTCCGTTATGCCAACTAATGAAGTGGGAAGTT
ACCCCGCATGAAATCCGCCCAGATATTTATCCTAACCCAACCGACGGTTTACCTGTTGGATGTAAGGTTA
ACACATCAAATGCGCCGGAGTTGATTCATGAAAATCAAGCATGAACACATCCGCATGGCGATGAATGCCT
GGGCGCATCCGGACGGCGAAAAAGTACCGGCTGCGAAAATTACCAAAGCGTATTTCGAGCTGGGAATGAC
GTTCCCGGAACTGTATGACGACAGCCATCCGGAAGCCATGGCTCGCAATACTCAGAAAATTTTCCGCTGG
GTGGAGAAAGACACTCCTGATGCGGTTAAAAAAATTCAGGCGTTGTTACCAGCGATCGAAAAAGCGATGC
CGCCTCCGCTGGTGGCCCGAATGCGCAGCCACAGTTCCGCTTATTTTCGGGAGTTGGTAGAGACGAAGGA
ACGGCTGGTGAAAGATATTGATGATTTCGTTGCATCAGCGATCGTTCTGTTCGATCAGATGAATCGTGGT
GGCCCGGCAGGAAACACTCTGGCTGTGCATTAATTGGGTAATAAATATGAGTAATGACAAAAAATTGACA
CTGAGCGTTTACGAAAACAGTCCGCACATCTGGCGTGGCGGTTTATCTGATGTGGAGCTGGCAGAGTGGT
TGATACATAAAGCTAATGCGCTGCTCTGGCGTTTGTCAGCCAGAGAACAGCGCAAGGAAACCAGAATAAA
GCTGGCTGATGCAGAAGCGTGTGCCGGGCTTATTGAGGATTATACAAATCTTGGTATTTCTTCAGCAGAG
AGTGATCCCATTCAGCCTCTGAGCAGGGAGTCAATCCAGCACGCTGGTTGTATGGCACATCTTGTAACTG
CTCGTCAACATGAGGTGGGTATTGGATCACTTCCGGCGGGATATTCGCTGATTCCAGAGCTGGTTGAAGC
AAGAAAATCAGTTCAGAAAAAGAGAGATGACGCACTTCAATTATTGAGAGAGCACTATGGCGCGATACCA
GAATGCGAACAGCGTCGATACCCTGAAGGTTATGAATGGATGCAGTCTCTTTTTGAAGTTCGCTAATCAA
TATGTCGAGACGAAGGTATGTTTCGGCGCGCAGCCAGGCTCTGTAATCCGGGAGCATTTCGGGGCTGTTA
CACCAGCGGTTTGTTGCTGCAACATTTAATACATGAGCCTGATAAAGGCTTTTCAAAAAATACATGTCGA
ACCTCCTCTGGTTCTGTCGATTGGGAACCACAGATTATATCCGGAGGAAGGTTCGGCACCAGATGAGGTA
GCCATGCGTGATTACGCAAAAGTTTCTCCGCGATTCTGGCTGGGAGAAACGGGGAGAGAACTTAGAAAGG
CGGGTGCAGAAGCGCAAGTTGTTGCTTTTTACCTGATGACATCCCCTCACGCAAATATGCTGGGTTTGTA
TTACCTGCCAGTTTTATACCTTGCTCATGAAACCGGGCTTGGTCTGGAAGGGGCTTCAAAGGGGCTTAAA
AGGGCTGTTGAAGCTGGTTTTTGTAGCTATGACCATGATGCAGAGATGGTCTGGGTCCATGAAATGGCAG
CCTGGCAGGTTGGGGAAACGTTGAAGCCTGGCGATAACCGTTGTGCAGGTGTCAGGAATGAGTATGCATC
ATTACCTGAAAACGCTTTTCTGTCAGTGTTTTACGACAGATATAAAACGGATTTCCATCTGGATGTGAGG
CGGAATAATAGCCGAAATTCGGTAAGGGGCTTCGAAGGGGCTTTTAAGGGGCTTCGAAGCCAAGAACAGG
AACAGGAGCAGGAGAAAGAACAGGAACAGGACAAAAACACTATGGTTCATGGCAAAAAAAACACCACGAA
CCAGGCAGGGGATGTTCAGACCGTCAATCCTGGTCAGCCAGCAGGCACGACACCGGAAGCCGATTCGGGC
GCTGTGCAGCAGGTGATGACCGCAGGGTCGGAGCAATCACACCAACTGCAGCAGCCTGAAGCCGATTCCG
CCATTCAGCGGGAAGCCGATCGGGTAGTCCCGGAAAGCACCGGGCAGTCTGTGGGACGAGTGGATTATCC
GGATGTGTTCGAACAGGTCTGGCGGGAATACCCGTTGCGTGCTGGGGCAAACCCGAAGAAATCCGCTTTC
AGTGCCTGGAAGGCCAGATTGCGCGAGGGGGTGCCACCAGAGACCATGCTGGATGGTGTGAGGCGTTACG
CGAGATACCTGGCGGCGACCGGGAAAGCGGGAACGGAATTTGTTCAGCGAGCGACGACGTTTTTTGGGCC
GGACCGGAATTTTGAAAACCCCTGGTTGCTCCCGGTAAGCGGCACGAACAACCAGCGTTGTGTGAATCAT
ATTTCTGAACCGGATACCGAAATTCCGCCGGGATTCAGGGGGTGATGTGGCATGAAAAACATTGCGGCAG
CCGGGGTTCTTGAACGTATTCGCAGACTTGCACCACAGGCGTCGGTTCCACCGTACCGGACGGTGGAGGA
GTGGCGGGAATGGCAACTTGCTGAAGGACGAAAACGCAGCGAGGAGATTAACCGCCAGAATCACCAGTTG
CGGGTGGAAAAAATCCTGAATCGTTCGGGCATCCAGCCTCTGCACAGCAAATGCTCGTTTGCGAATTATC
AGGTGCAGAACGACGGGCAAAAATACGCGCTGAGCCAGGCCAAATCCATAGCTGACGAACTGATGACCGG
GTGCACGAATTTTGTGTTCAGCGGTAAAACCGGCACCGGGAAAAATCACCTTGCAGCGGCGATGGGTAAC
CGGCTGATGGCGAAGGGGCGCAGCGTGATTATCGTCACCGTGTCTGATGTCATGAGCGTGTTGCATGACA
GCTACGACAACGGCAAATCCGGGGAAAAATTTTTACAGGAGCTTTGCAGTGTTGATTTGCTGGTCCTGGA
TGAAATAGGCGTTCAGCGGGAGACGAAAAACGAGCAGGTGGTATTACACCAGATAATTGATCGCCGGACA
GCATCACTGTGCAGTGTCGGGATGTTAACAAACCTGAATCATGCCGCAATGAGTACACTTCTTGGTGAGA
GGATTATGGACCGCATGACCATGAACGGTGGTCGATGGGTGACGTTTAACTGGGATAGCTGGCGTCCAAA
TGTCAGCAATATGAGGGTTGTGAAGTAATTTTGTCCGGAGGAAATTTTAATGGAAACCGTATCTGACGCA
CTGAAAGCACTGAAAAAAGCCTCTTCACATGTGGTGGCAGCTCGCCTTGGAATCAGTCGTGAAGAGGCTG
TCAACGAGCTGTGGGAACTCAAAATAAATGGCGTCGTTGATAAAACTGGTCACACCTGGTTTCTGGCTGG
CGAAGGTGAATCCCGGGTAACCGAAGAGCGGCCAGTAAAATCTGAAGCACAGGATATGCTGACCGGGGAG
GTCGAACAAAAAGTTACCGCAGACATGATGATTGAGTTTATCGGTCAGGATGGGGCTAAAACGTGTGAGG
AACTGGCGGGTAAGTTCGGTGTCAGTACTCGCAAGGTTGCTTCCACGCTGGCGGTGGTAACCGCAACGGG
GCGGCTGGCACGCGTTAATCAGAACGGTAAATTTCGTTACTGCATGCCGGGCGATAATTTACCAGCAGAG
CCGAAAGCCGCGCTGGTAACGGAAAGTGATGGTAAGGCCTTTCCTCAGCCAGCAGGTGCTGCGTTACCAG
TCCGGGAAGCCGCAACACAGGAAGAAATTAAAACAGAAACTGTGGCGGACATTGTGCAGCCGTTGCCATC
GTTTACCGAAACGCAAGCAGATGAGCTGATTTTTCCGTCCCTTCGCAGGGCAAACCTGGCGCTGCGCAGG
GCGAAAAGTGATGTTCAGAAGTGGGAGCGAGTCTGCGCCGCGCTGCGGGAGCTGAACAAGCACCGGGATA
TTGTTCGACAGATTACTGATTCTTCCCGCCGTGTTGTATCGGAAAAGTGATTGCCGGAGGCGCTTATGGC
AAAAGTATTTACACAGGAAGAGCGGGAAAAAATTAAAGGGCAGGTTGTTGAGCTAGTACGCCGGAGTGGG
CGCGAGACGTTACGGCAACTGGAAGCCAAGACAGGTGCGACAAGATATCTGATGAGCGTTCTTGCCAGAG
AGCTGGTTGCCAGTGGCGATGTATACAACTCTGGTTACGGGTTATTCCCATCTGAACAGGCTCGTAAGGA
CTGGCAAAACGCCCGCAAAAAACTATCGAGGGCAAAACTGAAGAAACCGGTTGTGGTTGATCCTGACCTT
ATCTGGTCATTACCAGACGGAGAAATACGCCGCTATGACAGGCAATTGAACATAATTTGTAGTGAGTGCC
GTAACAGTGAAGTGATGCAGCGAGTTTTGATATTTTACACAGGAGTAATGATGGAATAGTGAAAATAACA
TGAAACCTTTGGATTCTGGTGTTTCAGTGGATGGGAAAAGAGCAGATACATAGAAAATGAATAGCAATAA
TTCACAGTCTGGATGTTGTTTGTATGCTTATAAAATGATCCTAGTATGCATTGCCGGAGTTGAATCAGCT
CCAATGAAGAAACTGAGAGGAGTATTTAGAAGATAGCTAAATGGATGTAATTATTAGTATCTAAAAAATA
GTATTTTTGAAATGGGTCTAAGAACACAACAATGTACAAATGAGAAGTTATCTTTTAATATGTTCAAAGA
CCCATTAGGATTGATATCAGTTATGTTAGCTAGATTGATAAAGTGATTACATATTTTCTGTTATATGCTG
AAATGAATAATGCTATTCCAGAGTGCAGCAGAGAAAGTCTCCTGATGATTGAGCTCTGGAAATTGTACAA
TAGAAAAATTACTGTATTTTTCTGTCAAAATATTTCTCAAAACAGATTCCGCTTTGATGGCTTCAGGATA
TAAAGATGCGGAGTAATCAAGGCTAAGATTTCCGTTAAGCAAGCATATACTTTTAGTGTGCTTTGATTCT
GATATATCATCTTTAATTATCTTGATGATTCTTTCATTCTGCCATAGAAGTGATGGTGCAGATATATAAT
AATAGTTAAAGCATGAATTATTTTTTAAGCAATCAAGCACAAAAATAGCACCTAGCGAGTGTCCCCATAT
ACCGATTCTGGAACTGTTCGGAGCAATAGTACTAACCCATGGCATGATCTGAGTTAGTAATAATTCTCGG
AAAGACTGGCTTCCTCCACCAGTAAAGTAGATCCATGCTGGTTTAGAGTTATCAACAATAGCATTTTCAC
CATCAGGAGTATAATCGTAAGCACGGCGATGAATGCTAAGGTTATTCCAAGATTCATAACCAAGTGTAAC
TAACACTGGTGGATTGGGTAGTGCATCAATAACAGGCAGAATATCAGAAATGTAATTGTTGGCACTATTC
CCATCAAGTATATAAAGAGTTGCATTATTTTTTTTAATGTTTTTTGGAGTAAAAATACATATTTTATATT
TGGTGTCATGGTTAATTGAGTTAAATATGCGTGTTTGACAATGAATGTCCATATGTTTAGTCATGCGTTC
TCCCCATGAGCATTAAAGGATGCTTAAGATATGCTATGTCACTGATAAAAAATTTGTTGTGTGTGTTTAG
TTATTTTATCTACCTCCATTATGATTTAAGACTGATATATGTTATCAGCAAAGGTACATCGTTATTATTT
TACCTGTCAATACATTTGATATTGATTATCGTTTACATCGCTTGCTTAGGAAATTGAAGGCAGGTAACTA
TCATGTCAATGAACTAACCCACAGTCTAACGTACTTCTTTCCCCAATCACCAACAACCAAATTCCTGTTA
TCACCACTGGGATTTTGGCGCAACTTCATGGTGCAGAGGTAAATAGCATCAAGCAAAATCTCTTTTTCCG
TTGTTGTCCTTATGGGACGTCTGTCTTTCTGACCGATTTCATATTGGCGAGGTAATGGGAAGTTAAGTAG
AATAGCTGCGGGTGCTTGAGGCTATCTGCCTCGGGCATGAACACCAACGGCAGATAGAGAAAAGCCCCAG
TTAACATTACGCGTCCTGCAAGACGCCTAACATTAATCTGAGGCTCAATCTATGAACGGCAAATCTAGGT
TAGCCTCTTACGTGCCGAAAGGCAAGGAGAAGCAGGCTATGAAGCAGCAAAAGGCGATGTTAATCGCCCT
GATCGTCATCTGTTTAACCGTCATAGTGACGGCACTGGTAACGAGGAAAGACCTCTGCGAGGTACGAGTC
CGAACCGGCCAGACGGAGGTCGCTGTCTTCACAGCTTACGAACCTGAGGAGTAAGAGACCTGGCGGGGGA
GAAATCCCTCGCCACCTCTGATGAATCAGGCATCCTCAACGCACCCGCACTTAACCCGCTTCGGCGGGTT
TTGTTTTTTCCTGGCATTCTGGTTTACAATTCGCACGCCAGCCTGAACAACTGGCACCTGCTGCGCCAGC
AGAGACAACCGATGGCGCACGATACCAAATTATACAATTCTGATGATTCTGCCGTCTTTGCCAGCAGGCG
CGGACGGTGTTTTCACGCATTCAAATCTGACTGGTACCAGCATCCCCCATGCACTGAAGAACAGGCCGAA
TGGCTCATTCAGTGTTACCGCAGGCGCGGATGCGAGGTTAAAAAAGCCCTTAGCCTCGACTACCGTCACT
GGATAATCTCCGTCAGGCTCCCTTACTCCGAACGGCCACCGCGTCCGTCCCGCACATTCCAGCAACGGAT
CTGGAGGTAATGTGCGGGTATTACTTCGACCTGTTCTGGTACCGGAACTCGGTCTGGTTATCGTTAAGCC
AGGCCGTGAATCAATGTCAGCATTCCATAACGGCAGAATACTGGTGGAGCCGGAACCAAAAAGCATGCGA
GCTCTGCCGTCCGGGGTTGTACCTGCCGTTCACCAGCCGCTGGCGGAAGATAAATCACTACTGCCATTTT
TCAGCGATGAGCGGGTGATCCGTGCTGCGGGTGGCGCTGGTGCACTGTCTGACTGGTTATTACGTCACGT
GAAATCCTGCCAGTGGCCTCATGGTGATTATCATCACAGCGAAACTGTCATACATCGTTACGGTACCGGC
GCGATGGTGTTGTGCTGGCACTGCGACAACCAGCTGCGCGACCAGACATCCGAATCACTTGAGCAACTTG
CTCAACAGAATCTGGCCGCCTGGATGATTGACGTCATCCGCCACGCAATGAATGGCATACAGGAACGGGA
ATTATCGCTGGCTGAATTATCCTGGTGGGCAGTCTGCAATCAGGTGGTGGACGCATTACCTGAGGCAGTA
TCGCGTCGTTCTCTGGGATTACCGGCGGAAAAAATCCGCTCCGTATACCGTGAAAGCGACATCATACCGG
GAGAACAGACCGCCACCAGCATACTGAAGCAGCGCACAAAAAATATTGCGCTACCGCCTCACACCCACCA
GCAACAGAACCCACCACAGGAAAAGACGGTGGTCAGCATTGCCGTTGATCCGGAGTCTCCGAAATCCTTC
ATGAAACGACCTAAACGTCGCCGCTGGGTAAATGAGAAATACACACGCTGGGTAAAGACACAGCCGTGTG
CGTGTTGTGGTAAGCCAGCGGACGATCCTCATCATCTGATTGGTCATGGTCAGGGTGGAATGGGAACAAA
ATCCCACGATATTTTCACGCTACCGCTGTGTCGGGAGCATCACAACGAGCTTCATGCGGATCCGCTGGCG
TTCGAAGAAAAGCATGGTTCCCAGGTTGATTTAATTTTTCGTTTTCTTGATCACGCTTTTGCAACCGGCG
TGCTCGGGTAAAAGAGGTTACTGATGCGTATAGAGTTTGTTTTGCCTTACCCGCCGACGGTGAACACCTA
CTGGCGACGTCGTGGCAGCACATATTTTGTATCAAAAGCCGGTGAGCGTTATCGCCGGGCTGTGGCGCTT
ATTGTTCGCCAGCAGCGGCTGAAATTAAGCCTGTCCGGACGGCTGGCAATAAAAATTATTGCAGAACCAC
CGGATAAGCGCCGCCGTGACCTGGACAACATTCTGAAAGCACCGCTGGATGCGCTGACGCATGCGGAAGT
GCTCATTGATGACGAGCAGTTTGATGAAATCAATATTGTGCGCGGTCAGCCTGTGCCAGGTGGACGGCTG
GGCGTGAAGATTTACGAAATCAGAGGTGGTAACGATGGCGCGTGATATCCAGATGGTTCTTGAGCGATGG
GGGGCATGGGCAGCAAATAATCATGAAGATGTAACATGGCCCTCGATAGCTGCTGGTTTTAAAGGATTAA
TCCCGACTAAAGTGAAATCACGTCCTAAGTGTTCTGATGATGACGCCATGATAATTTGTGGTTGTATGGC
ACGATTAAACAAGAATAATCAGTATTTGCACGATTTGTTGGTGGATTATTACGTAGGTGGAATGACATTT
ATGGCTCTTGCACGTAAGCATAGATGTTCTGATGGGCTTATTGGTAAAAGGCTTTATAAAGCGGAAGGTA
TTATTGAAGGAATGCTTATGGCTCTGAATGTCCGGTTAGATATGGATATGCGGTAGGGATATATAGTGAT
GAGGGTTATGTTTTCTGTGTTTATAATTAACATGTTTATTTTTTGATGGTCATGTATTGTGGAAGGTAGA
TAAAATGTTGCCTGGTGAATTGAAAATATTGATAATCAATCTTCATCATTAAATAAAAGGAGTGCTTATG
TGGATTGTGTTAGTACTGTCACTGTCAACTCTCAGTTGGCATAAGGTAGTGGCTTTTTCATTGTTGACGG
TGTCTGTTGTCCTGGCTGTGCTTAATGATATTATTGATTGGTCGGTGTTATTTTTTGTTGCTACAATCGT
TTTTTTTATTATTTTGAAGTTCAACTGGAAATATAACGCCTGGGCTAAATCTATATATGAAGTTGGCATA
GTTTTATCAGCCATAGCATTATTTTTCCATCTATGGCCAGGGTTTCACAATCCTGTAGTGCTAAATTCTG
TTACTGTTGGCCCTCAAAGTACTCCCTATACAATGTATTTTAATTTTGATAAAGCGCTGGTGCCATTTTT
GTTAGTCCTGTGTACATCTTCTTTGTTTAAAAAAGAAGTAAAATCAGAAGTGTCTTTGTGGAAGTGGGGG
GCTCTGTCGCTCTCTGTTCCTCTTATCCTGTTTTTGGCTGTTTTTTTTGGTGGATTAAAGCCAGAGATTC
ATTTTCCTGAGTGGTTGCCAGAGTTTATATTGGCTAATTTGTTTTTTGTGTCTCTGGCAGAGGAATCATT
ATTTAGAGGGTATATTCAATCACGGCTATCAGAAGTAACGTCTCCATTGGTTGCATTAATTGTGGCGGCT
TTGTTGTTTGGTTTTTATCACTATTCAGGTGGTGCTTTACTTGTATTATTTGCCACGTTATCTGGTGTTG
TGTATGGATTGTCATGGATGTGGAGTGGGCGTTTGTGGGTTGCCACCCTTTTCCATTTTGGTTTGAATCT
GTGTCACTTGTTATTCTTTACCTATCCATTTTTAAAACATAATTGATTTTTTCTATGGTTTTAAATTTAT
AAGACTGAAAAATAGCAGGACGTGACATTTGCATGAAAAATATGCACGGCAAAGCATTTACGTACGTAAA
AAATCAGGTATGCTGTTAAGAGTGGTTATTTCGCCGCATAGCTTGACCCCGCCTCTGAGCGGGTTTTTTG
TGCCCGCAAAGTAGCGCAGTGCGTTAAATGTGCTGGTAGTTATTAATACAGGTCTTTCAGCTTGCTGGCT
TTTTCGACAAGAGTTATTGGTGTGTCACGTTAACCGGAAAGGGTAAAAAGACATGCTGAAACAGCAGGAT
ATGACAGAAACCGCCAGAGTTGTGTTTGATGAATTAAGCGTCACCGAACCGGCGACGGTCGGGGAGATTG
CGCAGAATACGTACCTTTCACGCGAGCGCTGCCAGTTAATACTGACCCAGCTGGTTATGCGGGTCTGGCA
GACTATCAGTTCGGTTGTTACAGACGCCTTCAGTCCTGAAGGCTTTTTTATTTGTGGTAAATGGGCGGCT
GGTGGGTGTTAGCGGCACCTGTCAGTCCTTTGCTTATGTGTTGATGATAATTTACCTTTTGGGGCTATAA
TTGAACTAACCAATTGCTAATGAAAGTAAAATTATAATGGTTGTTGTCTGTTCAGTTATCATGGTTTGCT
CCCCAATTAATATTTTTCTTGAAAAGGATACGTTGTCACTTAAGCCCGGCTCAGTCGTTCTGGCCACCAA
ATGCATCAGGGCGCTTTTCCTTATGCATTATGGCAAAGTTAAAATTTTCGATATAAACCATTCCATAGTA
AGTCAATATCTGGAAATTCAGCATAAGCTGACAAGAACTCATCTGACTGACGTTCCGCTTTATCTGTCAC
TGGAACCCAACAACCCTGCGTTGGCTGAGGCTTTAATTACCAGCCAGAGATTTTCCGGAGATACCACGGA
TATGTTTCTTATGATGGCATGCCTGTCGCTGTTTGAATCAGATGAACGGATATTATTATTTTTAAGTGGA
TGTTTATCCAGTATAAGTGCCAAAGTCAGGGCGATAATTCAGACAGATATATCAGCAAGCTGGACGCTTG
GTGCGATTGCGTTACGCCTGCATATGAGTGAGAGTTTGTTAAAGATAAAACTGAAAAATGAAGGGCACAT
GTTCAGTCGCTTGTTGCTGGAAGAGCGGATGCGTGTTGCTGTCAATATGTTATGTTCCCGGCATGGATAT
GGACAGGCTGTAGCAGAAAAATGCGGTTATTCAAGCTGGTCCTACTTTATTTCTGTATTTCACCGCTATT
ATGGCTTCCCGCCAGACAGATATGTATCCAGGCAAGGGCTTGATTATTGATTTTCATCTGATTATTATTT
TTTGACCCAGCCCTTTAGCTCAGTGGTGAGAGCGAGCGACTCATAATCGCCAGGTCGCTGGTTCAAATCC
AGCAAGGGCCACCATCACATACCGCCATTAGCTCATCAGGAAAGAGCGCCAGCTTTCGAAGCTGGTTGCG
CGGAGTTCGGGTCCCCGAAGGCGGTCCATTATCTGTATCCTGCGTTGTTAGCTCAGCCGGACAGAGCAAT
TGCCTTCTAAGCAATCGGTCACTGGTTCGAATCCAGTACAACGCGCCACACTTATTTTCCCTGGCTCGCT
TTTGCGGGCCTTTTTTTTAAATGTCTCACAATTCAGGCGGTTGACTGTTGTCTGGTTTGCGGGGAGTTTG
TTAAAAGAAACTGGCATGGTGAATCCCCCTGTGCGGAGGGGCAATCAGCGAGTAGGTATATGGGATAATC
GCGGATTCAGGTGCTGGTACTGAATTCACCGGGAGGCACCCGGCACCATGCAATGGCACATAGCGCCACT
CTCCAGCCCCTCTCCGGAGGGGCTTTCTTATGGACAAAAAAAGCCCGCGCAGGGAGACGCGGGCGGCAAG
GAATAAACAACAAAACGTGAAGTAATATTTCAGCTGGCGAATAATATCCGACAGTAATCACTCTGCGCAA
TAGCGCGGCCTTTTTCGTATTGCGGGCTGTTGTCTCTCTTCTGCCATTGTCCTGTAACTTCCGGACTTCA
GCCCGCTCCTCATTTTACTCACAATATTATCCCGGCCGGGAGGATTCATGGCATTTAAACACTATGATGT
TGTCAGGGCGGCGTCGCCGTCAGACCTTGCGGAAAAGCTGACACACAAACTGAAAGAGGGCTGGCAGCCA
TACGGCGGACCGGTTGCCATTACGCCGTACACACTGATGCAGGCGGTGGCTATTGAAGGAGATCCACAGG
TCGGCCCTTCATCTAAGCCGGACTGGTTCTACGTGGTTGTGCTTGCCGGACAGTCCAACGGCATGGCCTA
CGGTGAAGGGCTTCCGTTACCGGATTCTTACGATGCTCCGGATCCGCGCATTAAACAGCTGGCGCGCCGC
AGCACGGTAACTCCGGGTGGAGAGAGTTGTACGTATAACGACATCATTCCGGCCGACCACTGCCTGCATG
ATGTGCAGGATATGAGTACGCTGAATCATCCGAAGGCAGACCTGAGCAAAGGGCAGTACGGCTGTGTCGG
CCAGGGCTTACATATTGCCAAAAAACTGCTTCCGTATATCCCGAATAACGCGGGGATCCTGCTGGTACCA
TGCTGTCGTGGTGGTTCTGCATTCACCCAGGGCGCTGAGGGGACATTCAGTGCGGACACGGGGGCCAGCC
AGGATTCGGCACGCTGGGGTGTGGGTAAACCGTTATATCAGGACCTGATTGCGCGCACTAAAGCTGCATT
ACAGAAGAACCCGAAAAATGTGTTGCTGGCGGTGTGCTGGATGCAGGGAGAGTTTGACATGAGCGCCGCC
ACCCACGCACAGCAACCTGCGCTGTTTACAGCCATGCTGACACAGTTTCGTGCTGACCTCTCCGTGTTTA
ACGCGCAGTGCCATGGTGGCAGTGCTGCAGATGTGCCGTGGATTTGTGGTGATACGACGTATTACTGGAA
AAATACATACGCTACCCAGTACGACACCGTGTACGGCGGGTATAAAAACAGGGAGAGTGAGGGCGTTTAT
TTTGTGCCCTTCATGACAGACGGTAACGGCGTCAATACCGCCACTAACGCGCCGGCAGAAGATCCGGATA
TTCCGGCATCAGGATATTACGGTGCGGCATCGAGAACGAATGGAAACCAGGTATCATCAAACCGCCCGAC
ACATTTCAGTTCATGGGCGCGCAGGAGCATTATTCCGGATCGTCTGGCAACCGCTATTCTGAACGCAGCC
GGGCGCACCTCCGCCTTCATCAGTGGTAAGGCACCGGAAATCAAACCCTCGCCCGGCGGCAACACGCCAT
CGGGTCCGTCTGCAGATACGTCCGTTCGCACAATCTCCCTGCTGCCGGCAGCCGGAGAGGCTGCTGCGCA
GGGCTGGAGCATTAAGGATGGCGGAATTCAGTTGTCAGATGGTGTATTTAAGATCACCAGGCAGAGCAAT
AAAACCTGGTCCCTGACGCATCCGGTGGATGACGCAATTACCCTGCTGACACAGGGCGGCAGACTGAACT
GTAAGTTCCGCCTGTCAGGCGCACTGACCAACAATCAGTTCGGGCTGGGGATTTATCTGTATACGGATGC
TCCCGTTCCTGATGGTGTGGCGATGACGGGTACCGGTAATCCGTTCCTGATGTCGTACTTCACTCAGACC
ACTGACGGCAGAGTGAATCTGATGCATCACAGGAAAGCCGGAAACACGAAGCTGGGGGAGTTCGGCGATT
ACGGTAACGACTGGCAGACGCTGGAGCTGGTGTTCACCGCCGGCAGTGCCACGGTTACTCCGAAACTGAA
TGGAGTGGCTGGCCCGGCATTCCAGGTTATAAAAGACAGTCTGACACTGGGACTGAATGCGCTGACGCTG
ACGGATGTTACAAAAAATGCAGCGTATGGCGTTGAGATAGAAAGTCTGGTGCTGGAGATAAATGCACCGG
CAGCATAATAAAAAAAGAGCCAGCGACTGACCTGAAAGAAGACGCTGGCTAAAAGGCCTTATATGTTTGT
AGAGACTTATTTTTCACAGACAGCAATGATGCCTGTCAATATATTATCAATATGCGGATTGAACCGCCCC
GGAAATCCTGGAGACTAAACTCCCTGAGAAAGAGGTAAACAGGATGACTAAAAATACTCGTTTTTCCCCC
GAAGTCCGTCAGCGGGCGATTCGTATGGTTCTGGAAAGTCAGGATGAATATGACTCACAGTGGGCGGCAA
TTTGTTCCATTGCCCCAAAGATTGGCTGTACGCCGGAGACTCTGCGTGTCTGGGTTCGCCAGCATGAGCG
GGATACCGGGGGCGGTGATGGTGGGCTCACCAGCGCTGAACGTCAGCGTCTGAAAGAGCTGGAACGTGAA
AATCGTGAACTGCGCCGCAGTAACGATATCCTTCGCCAGGCTTCCGCTTATTTTGCGAAGGCGGAGTTCG
ACCGCCTCTGGAAAAAATGATGCCACTGCTGGATAAGCTGCGTGAGCAGTACGGGGTCGGACCGGTATGC
AGCGAACTGCATATTGCCCCGTCAACGTATTACCATTGTCAGCAACAGCGACATCATCCGGATAAACGCA
GTGCCCGTGCGCAGCACGACGACTGGCTGAAGAGAGAGATACAGCGCGTATACGATGAAAATCATCAGGT
GTACGGTGTGCGTAAAGTCTGGCGTCAGTTGTTACGGGAAGGAATCAGGGTGGCCAGATGTACAGTGGCA
CGTCTCATGGCGGTTATGGGACTTGCCGGTGTTCTCCGGGGTAAATGGGCCCGTCGTCCGTCTGGCACCA
TCCATCACAGCGATAAAGGCTCTCAGTATGTGTCACTGGCCTATACGGAGCGACTAAAAGAAGCCGGATT
ACTGGCATCAACAGGGAGTACAGGCGACTCGTATGACAACGCGATGGCTGAGAGCATCAATGGTCTTTAC
AAAGCGGAGGTAATACACCGTAAGAGCTGGAAAAACCGTGCAGAAGTGGAACTGGCCACACTAACGTGGG
TGGACTGGTATAACAATCGACGATTGCTGGGAAGGCTGGGCCATACTCCTCCGGCAGAAGCAGAAAAAGC
TTATTATGCTTCCATCGGAAACGATGATCTGGCAGCCTGAGTTCACAGATAAAACACTCTCCAGGAAACC
CGGGGCGGTTCATTAATTAATGAAAAATATTCTCAATTTGTACCCAACAAAGACAAACACGACCAGAGCA
CCTGTTCAGACAGGTTTACTTAAACGACTTATATATGACACAAAAAGCGACCACTAAAGTCGCTTTTTCT
TATGGTAACAGGCAATAACGCTCTCAGATATTTTTTAGCATTTTTTTGACCGCGCGTTTCCGGACGTATT
CTGTTCTCCTGTCCCTTTATATCGTCGGAATACCCGCCGCTCTTCAAATCCCATTCCCAACTCAGAATGT
AGTCTGTTGACCGCTTGTTTTATTTCGGTCAGGTTCACCGGTGAAACCGGAGTCCGGCGCGCCTTACGCA
AACACTCTGCTCGTTTCTGTGCCGCCACTTTTCTTTTCTGGTCATCACTTAGCTGTACCATCACTTTTGC
CCATCGTTCAGCTGCTCTCCGGTACAGTCCTTTTTTCTCCAGACATTCTGCCACGTGATCATGTAGCATA
AGTGACCTCCGATTATCTACAGACTGCCATCCTGAATTTACCTTCCCTTAATGAAATAACAATAAAAAAC
AAACCACGCAAAAACAATAAAACAACACACAAAAAAAACTAAATAATAAACAAAAATAATCACCTTATTT
TATTATTTTTTGAGGGAGCAATTACTGAACAAAAAACGCTGACTATATACTCAAAACCAAACAACTATTC
TGCCAATCAGGTATCATGGCAACACACGGAATTACCGTGTTTTTGCCTTCTCTGCCCATACAATACGGGC
ATATACTTCATTCTCTATTGTAATATTTCTATCCATGTGCCCCACTCCATTTACCTGTAAATAATATTCA
AAATATTTATCACAGAAATCGTTTTTGGCCATGAACTGAGCACACTATAAAGTCCGGAACTGACTCTTTG
TTAAATTACCTTAACGTTACCAGTAACACCCTCATAACAAAACATCACGGTATACACTGGGTACGGATAT
ATTCCTGTGCTCCTTCCAGTTGCTTCTGCATTGCCATCAGCCGTTCTCTGAGGATGAAATAATCCCGTTC
AGCGGTGTCTGCCAGTCGGGGGCCGGTTGCATTATCCACGCCGGAGGTGCCGGTGGCTTCACGCACGGTA
CCGGAGCAGGTGGCGTTGATCCGCAGGCGCTTACGACCAGCGGCAACATCAGCACGCAGAGTTTCATTTT
CAGCTCTCGCATCGGCTAATTCCCTCGAGTATCTGGCATCAAGTGCAGCGACATCACGCTGGCGTATCTG
CATATCAGTAATTGTCGCGTTCGCCAGCTCCAGCTCACTGGCTTTTTTATCGCGCTGCTCTTTGTAGATG
ATGGCGTGATCACGGTAATGATTCAGCCCCAGACTAAGCGCACCACAGGCCACCAGCAGGACAATGATAA
CCACACACAGAACACGGTTCATATCACCACCAACGGATTGCCCAGACCAGAACAGCAATGGCCACAATAC
GAATGGCAAAAGCTGCCGCTCTTGTTAAATCCAGACTGGCTGGCGTCTCCACTTCAATGCCTTTCATAAT
GGACAACCTCAGAAAGAATCTTTTATACTTCCTCACAGGGAAAGTACCTCCCTACCCATAATTTCTCCCT
TGCCTTACTCAAGGTCAGAAAACACAAAACCCCGCTTGCTGCCAACAAACGGGGTTTTTACTTTTATTCA
CTTAGGTTTTACCAGTTTTCAGGATTTCGTGTTATCCACCCGCGTTGGCCAACGTCATTTTTCAGGAAAA
TATTCTGCTATCTGTCGATGTCCCAGCACGCCAGCGCGCTCTCCTGGTCACGCCGTGAGACCTGACCGTA
GCAATTATTTGAACGGATACGGCAGTCTCTGCCACCGTCCTTAATCCACCAGCGAATCGCCTCACAGGCA
CCTTTTCGATCGCCTGCATTAATTCGTTTATAAAACGTCGACGGGAAGCACTTACCGGGGCCAATGTTGT
ACGGACAGAATGACGCGATCCCCGCTTTCTGGGGTTCGGTCAGCGGCACCCGGATGTTTTTCTCCACCCA
TGCCAGCGCCTTGTCACGTTCGATGGCATTAACCCGGTCGCATTTTTCCTTTGACAGCTTCATGCCAGGA
ATAACAGGCTTACCATCCACCAGAATGGCACCACGGCAGATGGTCCAGATCCCCGCACCATCACGGTATG
CCGTGGTGTGGTTACCTTCCTTTTCATCCAGAAACTGGTCGAGGATTTCAGGCGCAGAAGCACCTGCACC
AATCAGCGCCAGAACGGCAGCCGACAGGCCGTATTTTATTTTTTCGTTCATGGGGATTTATCGATTTCTA
ATCCCTTGATATGTTAGGTATATAATCCAACACTCATGGTCGCTCTCATAAACATATCCCTTGAGACGCA
GCAGATTACAACAAATGAAGCCATATAAATGAACAGTAAAGAAAGTTTGCGCAGAAGATTTTTACAACTA
ATGACAGAAAACGTTAAATCAGAGTTACTTCTTCTGATGGCAGATAATAACGAAGCAACAAGCAGCATTC
TTGCAGACCCTTACGGTAAGATCTCACATAAAACGCTGGATATTATTACCACAACATTAACACCGCTGAT
GCTTCAACGGCTGAAACATAATATCAACGCATGGGTTAATGAAGAATTAAGTCCTCCCTGCTTATGGGAT
TCTCGTTACGCATGTCAGCAAAAAATGCGAATTTTCAACTTACTATCACCAAAGCTCAGGTAGCCATAAA
ATCCTGCCCTTCATGGCATACAGGATTTCAATGGAATCACAATGACCAACTCTTGCACAGCTGTATCCCT
GACTCCCCGACAACTCAGATTTTCAGTATCTGCTGCTATCTAAAGAGAAAGCGCACAAATGCAAGGGTCT
TTCATCACGTCCTGTTATTGATTGCCTGTGACCTTTTCTTACCTCATGGAACGTTTTTTCAGTTAGAAAT
ATTCATTTTACAACCAGTTCGTATTGTTTATTCATCGACTACTCTCCCCGCGCCACCTTACGACGGTCCT
CTCTGATTTTGAAATACAGGTTAGTCAGATACGTCAGCAGGCCAAACAGCAGACTTCCCAGCACTCCTAT
TGCCACCCACTGGGACGGAGAGACTTTGTCCAGCAGCTGCAGTAACCAGTATTCCGTCCCCACCGCTGAC
GTGGTGTATGACACACCTGTTGTGATTTTTTCCATCTGATGTATGTCTCCGTCACCGCCGACAGAAAATG
AAAGTAA
>4 1180157-1209126
ATGGCATTTAAACACTATGATGTTGTCAGGGCGGCGTCGCCGTCAGACCTTGCGGAAAAGCTGACACACA
AACTGAAAGAGGGCTGGCAGCCATACGGCGGACCGGTTGCCATTACGCCGTACACACTGATGCAGGCGGT
GGCTATTGAAGGAGATCCACAGGTCGGCCCTTCATCTAAGCCGGACTGGTTCTACGTGGTTGTGCTTGCC
GGACAGTCCAACGGCATGGCCTACGGTGAAGGGCTTCCGTTACCGGATTCTTACGATGCTCCGGATCCGC
GCATTAAACAGCTGGCGCGCCGCAGCACGGTAACTCCGGGTGGAGAGAGTTGTACGTATAACGACATCAT
TCCGGCCGACCACTGCCTGCATGATGTGCAGGATATGAGTACGCTGAATCATCCGAAGGCAGACCTGAGC
AAAGGGCAGTACGGCTGTGTCGGCCAGGGCTTACATATTGCCAAAAAACTGCTTCCGTATATCCCGAATA
ACGCGGGGATCCTGCTGGTACCATGCTGTCGTGGTGGTTCTGCATTCACCCAGGGCGCTGAGGGGACATT
CAGTGCGGACACGGGGGCCAGCCAGGATTCGGCACGCTGGGGTGTGGGTAAACCGTTATATCAGGACCTG
ATTGCGCGCACTAAAGCTGCATTACAGAAGAACCCGAAAAATGTGTTGCTGGCGGTGTGCTGGATGCAGG
GAGAGTTTGACATGAGCGCCGCCACCCACGCACAGCAACCTGCGCTGTTTACAGCCATGCTGACACAGTT
TCGTGCTGACCTCTCCGTGTTTAACGCGCAGTGCCATGGTGGCAGTGCTGCAGATGTGCCGTGGATTTGT
GGTGATACGACGTATTACTGGAAAAATACATACGCTACCCAGTACGACACCGTGTACGGCGGGTATAAAA
ACAGGGAGAGTGAGGGCGTTTATTTTGTGCCCTTCATGACAGACGGTAACGGCGTCAATACCGCCACTAA
CGCGCCGGCAGAAGATCCGGATATTCCGGCATCAGGATATTACGGTGCGGCATCGAGAACGAATGGAAAC
CAGGTATCATCAAACCGCCCGACACATTTCAGTTCATGGGCGCGCAGGAGCATTATTCCGGATCGTCTGG
CAACCGCTATTCTGAACGCAGCCGGGCGCACCTCCGCCTTCATCAGTGGTAAGGCACCGGAAATCAAACC
CTCGCCCGGCGGCAACACGCCATCGGGTCCGTCTGCAGATACGTCCGTTCGCACAATCTCCCTGCTGCCG
GCAGCCGGAGAGGCTGCTGCGCAGGGCTGGAGCATTAAGGATGGCGGAATTCAGTTGTCAGATGGTGTAT
TTAAGATCACCAGGCAGAGCAATAAAACCTGGTCCCTGACGCATCCGGTGGATGACGCAATTACCCTGCT
GACACAGGGCGGCAGACTGAACTGTAAGTTCCGCCTGTCAGGCGCACTGACCAACAATCAGTTCGGGCTG
GGGATTTATCTGTATACGGATGCTCCCGTTCCTGATGGTGTGGCGATGACGGGTACCGGTAATCCGTTCC
TGATGTCGTACTTCACTCAGACCACTGACGGCAGAGTGAATCTGATGCATCACAGGAAAGCCGGAAACAC
GAAGCTGGGGGAGTTCGGCGATTACGGTAACGACTGGCAGACGCTGGAGCTGGTGTTCACCGCCGGCAGT
GCCACGGTTACTCCGAAACTGAATGGAGTGGCTGGCCCGGCATTCCAGGTTATAAAAGACAGTCTGACAC
TGGGACTGAATGCGCTGACGCTGACGGATGTTACAAAAAATGCAGCGTATGGCGTTGAGATAGAAAGTCT
GGTGCTGGAGATAAATGCACCGGCAGCATAATAAAAAAAGAGCCAGCGACTGACCTGAAAGAAGACGCTG
GCTAAAAGGCCTTATATGTTTGTAGAGACTTATTTTTCACAGACAGCAATGATGCCTGTCAATATATTAT
CAATATGCGGATTGAACCGCCCCGGAAATCCTGGAGACTAAACTCCCTGAGAAAGAGGTAAACAGGATGA
CTAAAAATACTCGTTTTTCCCCCGAAGTCCGTCAGCGGGCGATTCGTATGGTTCTGGAAAGTCAGGATGA
ATATGACTCACAGTGGGCGGCAATTTGTTCCATTGCCCCAAAGATTGGCTGTACGCCGGAGACTCTGCGT
GTCTGGGTTCGCCAGCATGAGCGGGATACCGGGGGCGGTGATGGTGGGCTCACCAGCGCTGAACGTCAGC
GTCTGAAAGAGCTGGAACGTGAAAATCGTGAACTGCGCCGCAGTAACGATATCCTTCGCCAGGCTTCCGC
TTATTTTGCGAAGGCGGAGTTCGACCGCCTCTGGAAAAAATGATGCCACTGCTGGATAAGCTGCGTGAGC
AGTACGGGGTCGGACCGGTATGCAGCGAACTGCATATTGCCCCGTCAACGTATTACCATTGTCAGCAACA
GCGACATCATCCGGATAAACGCAGTGCCCGTGCGCAGCACGACGACTGGCTGAAGAGAGAGATACAGCGC
GTATACGATGAAAATCATCAGGTGTACGGTGTGCGTAAAGTCTGGCGTCAGTTGTTACGGGAAGGAATCA
GGGTGGCCAGATGTACAGTGGCACGTCTCATGGCGGTTATGGGACTTGCCGGTGTTCTCCGGGGTAAATG
GGCCCGTCGTCCGTCTGGCACCATCCATCACAGCGATAAAGGCTCTCAGTATGTGTCACTGGCCTATACG
GAGCGACTAAAAGAAGCCGGATTACTGGCATCAACAGGGAGTACAGGCGACTCGTATGACAACGCGATGG
CTGAGAGCATCAATGGTCTTTACAAAGCGGAGGTAATACACCGTAAGAGCTGGAAAAACCGTGCAGAAGT
GGAACTGGCCACACTAACGTGGGTGGACTGGTATAACAATCGACGATTGCTGGGAAGGCTGGGCCATACT
CCTCCGGCAGAAGCAGAAAAAGCTTATTATGCTTCCATCGGAAACGATGATCTGGCAGCCTGAGTTCACA
GATAAAACACTCTCCAGGAAACCCGGGGCGGTTCATTAATTAATGAAAAATATTCTCAATTTGTACCCAA
CAAAGACAAACACGACCAGAGCACCTGTTCAGACAGGTTTACTTAAACGACTTATATATGACACAAAAAG
CGACCACTAAAGTCGCTTTTTCTTATGGTAACAGGCAATAACGCTCTCAGATATTTTTTAGCATTTTTTT
GACCGCGCGTTTCCGGACGTATTCTGTTCTCCTGTCCCTTTATATCGTCGGAATACCCGCCGCTCTTCAA
ATCCCATTCCCAACTCAGAATGTAGTCTGTTGACCGCTTGTTTTATTTCGGTCAGGTTCACCGGTGAAAC
CGGAGTCCGGCGCGCCTTACGCAAACACTCTGCTCGTTTCTGTGCCGCCACTTTTCTTTTCTGGTCATCA
CTTAGCTGTACCATCACTTTTGCCCATCGTTCAGCTGCTCTCCGGTACAGTCCTTTTTTCTCCAGACATT
CTGCCACGTGATCATGTAGCATAAGTGACCTCCGATTATCTACAGACTGCCATCCTGAATTTACCTTCCC
TTAATGAAATAACAATAAAAAACAAACCACGCAAAAACAATAAAACAACACACAAAAAAAACTAAATAAT
AAACAAAAATAATCACCTTATTTTATTATTTTTTGAGGGAGCAATTACTGAACAAAAAACGCTGACTATA
TACTCAAAACCAAACAACTATTCTGCCAATCAGGTATCATGGCAACACACGGAATTACCGTGTTTTTGCC
TTCTCTGCCCATACAATACGGGCATATACTTCATTCTCTATTGTAATATTTCTATCCATGTGCCCCACTC
CATTTACCTGTAAATAATATTCAAAATATTTATCACAGAAATCGTTTTTGGCCATGAACTGAGCACACTA
TAAAGTCCGGAACTGACTCTTTGTTAAATTACCTTAACGTTACCAGTAACACCCTCATAACAAAACATCA
CGGTATACACTGGGTACGGATATATTCCTGTGCTCCTTCCAGTTGCTTCTGCATTGCCATCAGCCGTTCT
CTGAGGATGAAATAATCCCGTTCAGCGGTGTCTGCCAGTCGGGGGCCGGTTGCATTATCCACGCCGGAGG
TGCCGGTGGCTTCACGCACGGTACCGGAGCAGGTGGCGTTGATCCGCAGGCGCTTACGACCAGCGGCAAC
ATCAGCACGCAGAGTTTCATTTTCAGCTCTCGCATCGGCTAATTCCCTCGAGTATCTGGCATCAAGTGCA
GCGACATCACGCTGGCGTATCTGCATATCAGTAATTGTCGCGTTCGCCAGCTCCAGCTCACTGGCTTTTT
TATCGCGCTGCTCTTTGTAGATGATGGCGTGATCACGGTAATGATTCAGCCCCAGACTAAGCGCACCACA
GGCCACCAGCAGGACAATGATAACCACACACAGAACACGGTTCATATCACCACCAACGGATTGCCCAGAC
CAGAACAGCAATGGCCACAATACGAATGGCAAAAGCTGCCGCTCTTGTTAAATCCAGACTGGCTGGCGTC
TCCACTTCAATGCCTTTCATAATGGACAACCTCAGAAAGAATCTTTTATACTTCCTCACAGGGAAAGTAC
CTCCCTACCCATAATTTCTCCCTTGCCTTACTCAAGGTCAGAAAACACAAAACCCCGCTTGCTGCCAACA
AACGGGGTTTTTACTTTTATTCACTTAGGTTTTACCAGTTTTCAGGATTTCGTGTTATCCACCCGCGTTG
GCCAACGTCATTTTTCAGGAAAATATTCTGCTATCTGTCGATGTCCCAGCACGCCAGCGCGCTCTCCTGG
TCACGCCGTGAGACCTGACCGTAGCAATTATTTGAACGGATACGGCAGTCTCTGCCACCGTCCTTAATCC
ACCAGCGAATCGCCTCACAGGCACCTTTTCGATCGCCTGCATTAATTCGTTTATAAAACGTCGACGGGAA
GCACTTACCGGGGCCAATGTTGTACGGACAGAATGACGCGATCCCCGCTTTCTGGGGTTCGGTCAGCGGC
ACCCGGATGTTTTTCTCCACCCATGCCAGCGCCTTGTCACGTTCGATGGCATTAACCCGGTCGCATTTTT
CCTTTGACAGCTTCATGCCAGGAATAACAGGCTTACCATCCACCAGAATGGCACCACGGCAGATGGTCCA
GATCCCCGCACCATCACGGTATGCCGTGGTGTGGTTACCTTCCTTTTCATCCAGAAACTGGTCGAGGATT
TCAGGCGCAGAAGCACCTGCACCAATCAGCGCCAGAACGGCAGCCGACAGGCCGTATTTTATTTTTTCGT
TCATGGGGATTTATCGATTTCTAATCCCTTGATATGTTAGGTATATAATCCAACACTCATGGTCGCTCTC
ATAAACATATCCCTTGAGACGCAGCAGATTACAACAAATGAAGCCATATAAATGAACAGTAAAGAAAGTT
TGCGCAGAAGATTTTTACAACTAATGACAGAAAACGTTAAATCAGAGTTACTTCTTCTGATGGCAGATAA
TAACGAAGCAACAAGCAGCATTCTTGCAGACCCTTACGGTAAGATCTCACATAAAACGCTGGATATTATT
ACCACAACATTAACACCGCTGATGCTTCAACGGCTGAAACATAATATCAACGCATGGGTTAATGAAGAAT
TAAGTCCTCCCTGCTTATGGGATTCTCGTTACGCATGTCAGCAAAAAATGCGAATTTTCAACTTACTATC
ACCAAAGCTCAGGTAGCCATAAAATCCTGCCCTTCATGGCATACAGGATTTCAATGGAATCACAATGACC
AACTCTTGCACAGCTGTATCCCTGACTCCCCGACAACTCAGATTTTCAGTATCTGCTGCTATCTAAAGAG
AAAGCGCACAAATGCAAGGGTCTTTCATCACGTCCTGTTATTGATTGCCTGTGACCTTTTCTTACCTCAT
GGAACGTTTTTTCAGTTAGAAATATTCATTTTACAACCAGTTCGTATTGTTTATTCATCGACTACTCTCC
CCGCGCCACCTTACGACGGTCCTCTCTGATTTTGAAATACAGGTTAGTCAGATACGTCAGCAGGCCAAAC
AGCAGACTTCCCAGCACTCCTATTGCCACCCACTGGGACGGAGAGACTTTGTCCAGCAGCTGCAGTAACC
AGTATTCCGTCCCCACCGCTGACGTGGTGTATGACACACCTGTTGTGATTTTTTCCATCTGATGTATGTC
TCCGTCACCGCCGACAGAAAATGAAAGTAAAGAAAAACAAAAAAGCCGCCAGTGTCACCCACTGACGGCC
AACTCCGGGAGCCGTGATTATGGCATTCAGGCTCTGCTAAAAATGCCAGATAACATTCCGGCCTCCCCTG
ATTCAGGTTATAAATGACACAATATCTTGACAACACCCGTCACTGTCTGTCAGAAAATATACCGCCAGGC
ATAAGTATCATGTGAAATCCAACTATCCTTCTGAGCCAGCACCTCTCCACCGAAAGTCAGTGCTGGCTGT
TTTTTTCCTTAATAAAGCATCTGTAACTGGTTGTTGTTCTGCGGGTTCTGTTCTTCGTTGACATGAGGTT
GCCCCGTATTCAGTGTCGCTGATTTGTATTGTCTGAAGTTGTTTTTACGTTAAGTTGATGCAGATCAATT
AATACGATACCTGCGTCATAATTAATTATTTGACGTGGTTTGATGGCGTAGATGCACGTTGTGACATGTA
GATGATAATTATTATCATTTTGCGGGTCCTTTCCGGCGATCCGACAGGTTACGGGGCGGCGACCTCGCGG
GTTTTCGCTATTTATGAAAATTTTCCGGGATCCATGTCCGGTTTCTCTTCAAGTTAACTATATGAAAAAT
ATAAAAACAGGTCTTCTGTGAACCGGACATGAACAAAAAACAGACATGTAAACCGGACATGACCGGTTTT
GTTGTGATTGTGAGGTGAGAGTTTTTGCGAGGTGAGGAGTGGCTACGCAGACTGAAGTTGCCAGGCATTT
AAGTCTGACCGATCGCCAGCTTCGCAGATTGCAGAAATTGCCGGGTGCCCCGATATCGAATAAGCGAGGG
CAACTGGATCTGGATGCCTGGCGCGATTTTTACATATCGTATCTGAGGAGAAGTAAAAACGATGTGCCTG
ATGGCGATAGCGAAGACGACTATGAGGAGAAATTGCTTATTGCCAGATGGGAACTGACAGCAGAACAGGC
TGTTACACAGCAGTTAAAAAAGCGTACAGCCTGAACCGTCTGGTCAGAATCTGACGAATTAGACAAAGTG
GTGTCCACCAAATAAGTAGTGGGAACCAAAGTATCAGATATGCAGAAAAATGTGACTCCCGGCAGGCGAA
AAGGCTGCCCTAATTATCCTCCCGAATTTAAACAGCAGCTCGTTGCTGCCTCCTGTGAACCCGGGATATC
CATCTCAAAACTTGCTCTTGAAAATGGCATTAACGCCAATCTGTTGTTCAAATGGCGACAACAATGGCGC
GAGGGAAAGCTGCTATTACCTTCTTCAGAGAGCCCCCAGCTACTTCCTGTGACTCTCGATGCAGCTGCCG
AACAGCCAGAATCGCTCGCAGAGGACCCGGAAACCCTCAGTATCAGCTGTGAGGTAACGTTCCGGCACGG
GACGCTCCGCTTCAATGGCAATGTCAGCGAAAAGCTCCTGACTCTGCTGATACAGGAACTGAAGCGATGA
TCCCGTTACCTTCCGGGACCAAAATTTGGCTGGTTGCCGGTATCACCGATATGAGAAATGGCTTCAACGG
CCTGGCTGCGAAAGTACAAACGGCGCTGAAAGACGATCCCATGTCCGGCCATGTTTTCATTTTCCGGGGC
CGCAGCGGCAGTCAGGTTAAACTGCTGTGGTCCACCGGTGACGGACTGTGCCTCCTGACCAAACGGCTGG
AGCGTGGGCGCTTCGCCTGGCCGTCAGCCCGTGATGGCAAAGTGTTCCTTACGCAGGCGCAGCTGGCGAT
GCTGCTGGAAGGTATCGACTGGCGACAGCCTAAGCGGCTGCTGACCTCCCTGACCATGCTGTAAATCTCT
TTATCCTGGTTGTCACAGAATAAGCCCGGTAAAATACGGGCTTATGAACGACATCTCTTCTGACGACATC
TTCCTGCTGAAACAGCGCCTGGCCGAACAGGAAGCGCTGATCCACGCCCTGCAGGAAAAGCTGAGCAACC
GGGAGCGCGAAATAGACCATCTGCAGGCGCAGCTGGATAAACTCCGCCGGATGAACTTCGGCAGTCGTTC
CGAAAAAGTCTCCCGCCGTATCGCACAAATGGAAGCCGATCTGAACCGGCTTCAGAAAGAGAGCGATACG
CTGACTGGTAGGGTGTATGACCCGGCAGTACAGCGTCCGTTGCGTCAGACCCGCACCCGTAAGCCGTTCC
CTGAATCACTACCCCGTGACGAAAAGCGACTGTTGCCTGCGGCGCCGTGCTGCCCGAACTGCGGCGGTTC
ACTGAGCTATCTGGGCGAGGATACCGCCGAACAGCTGGAGTTGATGCGTAGCGCCTTCCGGGTTATCCGG
ACGGTACGGGAAAAACATGCCTGTACTCAGTGCGATGCCATCGTGCAGGCACCTGCACCTTCGCGGCCCA
TCGAGCGGGGTATCGCCGGACCGGGGCTGCTGGCCCGCGTGCTGACCTCGAAGTATGCAGAGCACACCCC
GCTGTATCGCCAGTCAGAAATATACGGCCGGCAAGGTGTGGAGCTGAGGCGTTCACTGCTGTCGGGCTGG
GTGGATGCATGCTGCCGGCTGCTGTCTCCGCTGGAAGAGGCGCTTCATGGCTATGTCATGACTGACGGCA
AACTCCATGCCGATGATACCCCGGTCCAGGTACTGCTGCCGGGTAATAAGAAGACGAAGACCGGGCGGTT
GTGGGCGTATGTTCGTGATGACCGCAATGCAGGGTCAGCGTTGGCACCTGCAGTGTGGTTCGCTTACAGC
CCGGACAGAAAAGGCATCCATCCGCAGACTCATCTTGCCTGCTTCAGCGGTGTGCTGCAAGCGGATGCGT
ACGCCGGGTTCAACGAGCTGTATCGCAATGGTGGGATAACGGAAGCTGCCTGCTGGGCTCATGCCCGCCG
AAAGATCCACGATGTGCACGTCCGCATCCCGTCAGCACTGACGGAAGAAGCCCTGGAGCAGATCGGTCAG
TTGTACGCCATAGAGGCGGATATAAGGGGAATGCCGGCAGAGCAGCGGCTTGCTGAACGTCAGCGAAAAA
CGAAACCGTTGTTGAAATCCCTGGAAAGCTGGTTGCGTGAAAAGATGAAGACCCTGTCGCGACACTCAGA
GTTGGCGAAGGCGTTCGCGTACGCACTTAACCAGTGGCCGGCACTGACGTACTATGCGAACGATGGCTGG
GTGGAAATCGACAACAACATCGCTGAAAATGCCCTGCGGGCGGTCAGTCTGGGTCGTAAAAACTTCCTGT
TCTTCGGCTCTGATCATGGTGGTGAGCGGGGAGCGCTACTGTACAGCCTGATCGGGACGTGCAAACTGAA
TGACGTGGATCCAGAAAGCTACCTTCGCCATGTGCTTGGCGTCATAGCAGACTGGCCGGTCAACCGGGTC
AGCGAACTGCTTCCGTGGCGCATAGCACTGCCAGCTGAATAACACATCCCCGTCAATACGGCCCTCGCTG
TACGCTTACTTAAAAAATGAGGTGTCAAAAGGAAAACTGATTGACACCGGGTTCTGTATTTTTGCCCTCA
GTAAGCTGGCAATGGCGTTATCCAGTACGCTTGATTCCATCCCTTTATCCATGCAGCGACAGTTTCCTGA
TTTAACACCGCGCCATCTTGACCATCTGAAAACCCTTATTGCTAAGGGGGCAAATCAGTGTGCGCGGGCA
GGGGATAAATTACCGGATTTACTTGATGAATATATCAGAGCAACAACTGAATAATATGATGAGCGCTGTC
ACAACTGCATTACAGCCCCTGATAAGGGCATTGCCGGTGACGCCAGTTGAATGGGCTGATCAAAATTATT
ATCTGCCTAAAGAATCTTCATATGGTGAGGGCGAATGGAAAACGCTGCCATTCCAGATCGCCATCATGAA
CAGTATGGGGAATGATCAGATCCGCACTGTTAATCTGATTAAATCTGCCCGTGTTGGCTATACAAAGATG
TTGCTGGGGGGGGGCGGGTATTTTATTGAGCATAAATCCCGAAACAGTCTGCTTTTTCAGCCCACGGATT
CTGCCGCTGAAGATTTTATGAAGTCTCACGTGGAGGCGACGATTCGGAACGTGCCATGCCTGAAAGACCT
TTCCCCATGGCTGGGTCGTAAACATCGTGACAATACTCTCACGCTGAAACGCTTTTCATCGGGCGTCGGT
TTCTGGTGCCTGGGCGGCGCTGCCGCCAAAAACTACCGTGAAAAATCCGTTGACGTGGTCTGCTATGACG
AACTTTCCTCGTTCGAGCCGGATGTCGAAAAAGAGGGCTCGCCAACCCTGCTGGGGGATAAGCGTATTGA
GGGGTCGGTGTGGCCAAAATCCATTCGCGGCTCGACGCCTAAAATCAAAGGCACCTGCCAGATCGAAAAA
GCCGCTAACGAGTCGGCGCATTTTATGCGTTTTTATGTGCCCTGCCCGCACTGTGGGGAGGCGCAGTATC
TGAAATTTGGCGATGAGTCCACGCCTTTTGGGCTTAAATGGGAGAAGGACAGCCCTGAAAGTGTTTTCTA
CCTCTGTGAACATCATGGCTGCGTGATCCATCAGTCTGAACTGGACCAGAGCAACGGGCGGTGGATCTGT
GAAAACACGGGCATGTGGACCCGTGACGGTCTGACGTTTTTCAGCGCCCGGGGTGATGAAATTCCGCCGC
CGCGCTCCATCATGTTCCATATCTGGACGGCGTACAGTCCGTTCACCACCTGGGTACAGATTGTCTATGA
CTGGCTGGATGCACTGAAAGATCCCAACGGCCTGAAAACCTTTGTGAACACCACGCTGGGCGAGACCTGG
GAAGAGGCCGTGGGCGAAAAACTCGATCACCAGGTACTGATGGATAAGGTGGTGCGTTACACGGCGGCGG
TGCCTGCCCGGGTGGTTTATCTGACGGCGGGCATTGACTCGCAGCGAAACCGTTTTGAGATGTATGTCTG
GGGATGGGCTCCGGGAGAGGAAGCCTTTCTGGTGGATAAAATCATCATTATGGGGCGTCCTGATGAGGAA
GAGACGCTGTTACGTGTGGATGCGGCGATCAACAAAAAATACCGCCATGCGGATGGCACCGAAATGACTA
TTTCCCGTGTCTGCTGGGACACCGGGGGGATCGATGGTGAAATTGTTTATCAGAGATCAAAAAAACACGG
TGTTTTCCGGGTGCTGCCGGTAAAAGGCGCATCTGTCTATGGCAAGCCGGTGATCACCATGCCAAAAACC
CGCAATCAGCGGGGCGTGTATCTGTGTGAAGTGGGAACGGACACCGCAAAAGAAATTCTCTATGCCCGTA
TGAAAGCCGATCCCTCGCCTGCGGATGAAGCCACGTCGTATGCCATCCGTTTTCCTGATGATCCGGAGAT
TTTTTCGCAGACAGAGGCGCAGCAACTGGTGGCGGAAGAGCTGGTGGAGAAGTGGGAAAAAGGAAAGATG
CGTCTGCTGTGGGATAACAAAAAGCGGCGTAACGAAGCGCTGGACTGCCTGGTGTATGCCTACGCGGCAT
TACGTGTGTCCGTGCAACGCTGGCAGCTTGATCTGGCTGTACTGGCAAAATCCCGGGAAGAAGAGACGAC
CCGGCCAACCCTGAAAGAACTGGCAGCGAAGCTGTCCGGAGGAGTGAATGGTTACAGTCGCTGAACTGCA
GGCGCTGCGTCAGGCGCGCCTTGATTTATTAACCGGTAAACGGGTGGTGTCTGTCCAGAAAGATGGTCGC
AGAATTGAATATACGGCGGCTTCTCTGGATGAGCTTAACCGGGCGATCAATGATGCGGAGTCGGTACTGG
GGACAACCCGGCGTCGCCGTCGTCCGCTGGGAGTGAGGTTATGAAACGAACGCCTGTCCTGATTGATGTG
AACGGCGTTCCGCTTCGTGAGAGTCTCAGCTACAACGGGGGCGGTGCAGGATTTGGCGGGCAAATGGCGG
AGTGGTTGCCACCGGCGCAGAGTGCCGATGCGGCCCTGCTGCCCGCGTTGCGTCTGGGGAATGCCCGGGC
AGATGATCTGGTGCGCAATAACGGAATAGCGGCCAATGCGGTGGCACTGCATAAGGATCACATTGTCGGG
CATATGTTTCTTATCAGCTACCGTCCGAACTGGCGCTGGCTGGGGATGCGGGAGACCGCAGCAAAAAGCT
TTGTCGATGAGGTGGAGGCGGCCTGGTCGGAATACGCCGAAGGGATGTCTGGCGAGATCGACGTGGAAGG
AAAACGCACGTTCACGGAATTTATCCGTGAAGGTGTGGGCGTTCATGCGTTTAACGGCGAAATCTTTGTG
CAGCCGGTCTGGGATACGGAAACCACGCAGTTATTCCGTACGCGTTTTAAAGCCGTGAGTCCGAAACGGG
TGGACACGCCAGGACACGGTATGGGGAACCGTTTTCTGCGGGCCGGGGTGGAGGTCGATCGATATGGCCG
TGCCGTTGCGTACCATATCTGTGAGGATGATTTTCCTCGCTCCGGGAGTGGACGATGGGAACGGATCCCG
CGTGAACTTCCCACCGGGCGTCCGGCCATGCTGCATATTTTCGAGCCGGTGGAGGACGGGCAGACCCGTG
GGGCCAACCAGTTTTACAGCGTCATGGAACGGCTGAAGATGCTCGATTCCCTGCAGGCAACACAGCTTCA
GTCGGCCATTGTGAAAGCCATGTATGCAGCGACGATTGAAAGTGACCTTGATACCGAAAAGGCCTTTGAA
TATATCGCCGGTGCGCCGCAGGGGCAGAAGGATAATCCGCTTATTAATATTCTGGAGAAGTTCTCCAGCT
GGTATGACACGAATAACGTGACGCTGGGTGGTGTCAAAATTCCGCACCTTTTCCCCGGGGATGATCTGAA
ACTACAGACTGCGCAGGATTCAGACAATGGATTTTCGGCGCTTGAACAGGCGCTGCTGCGGTATATCGCC
GCCGGTCTTGGCGTTTCCTACGAACAGTTGTCCCGTGATTACTCGAAGGTCAGTTATTCAAGTGCCAGGG
CCTCTGCCAATGAGTCGTGGCGCTATTTTATGGGGCGGCGAAAATTTATTGCGGCCCGGCTGGCCACGCA
GATGTTTTCCTACTGGCTGGAAGAGGCACTTCTTCGGGGGATTATCCGTCCGCCACGGGCGCGTTTTGAT
TTTTATCAGGCGCGATCAGCCTGGTCACGGGCAGAGTGGATTGGTGCCGGAAGAATGGCCATTGACGGGC
TCAAGGAGGTTCAGGAATCGGTGATGCGCATTGAGGCCGGACTGAGCACGTATGAGAAAGAGCCGGCGCT
GATGGGCGAGGATTATCAGGACATTTTCCGCCAGCAGGTCAGGGAATCTGCAGAGCGGCAAAAAGCCGGA
CTCTCACGTCCGGTGTGGATAGCGCAGGCGTATCAGCAGCAGATAGCGGAGAGTCGCAGGCCGGAAGAGG
AGACAACACCCCGTGAGACGTAATCTTTCACACATTATTGCCGCAGCATTCAATGAACCGCTGCTTCTGG
AGCCCGCCTATGCGCGGGTTTTCTTTTGCGCGCTCGGGCGCGAGATGGGGGCAGCAAGTCTTTCGGTACC
ACAGCAGCAGGTACAGCTTGATGCTCCCGGAATGCTGGCTGAAACGGACGAGTACATGGCCGGAGGTAAA
CGACCGGCCCGTGTTTACCGGGTGGTGAACGGTATTGCTGTACTGCCGGTGACCGGCACGCTGGTGCACC
GGCTGGGGGGTATGCGGCCATTTTCCGGAATGACAGGCTATGACGGCATTGTCGCCTGTCTTCAGCAGGC
AATGGCGGATAGCCAGGTGCGGGGCGTACTGCTGGACATTGACAGTCCGGGCGGGCAGGCCGCCGGCGCG
TTTGACTGCGCTGACATGATTTACCGCCTCCGTCAGCAGAAGCCGGTCTGGGCACTGTGCAATGACACGG
CCTGTTCTGCAGCCATGCTGCTGGCGTCGGCCTGCTCCCGACGGCTGGTTACCCAGACATCCCGTATCGG
CTCCATTGGCGTGATGATGAGCCATGTCAGCTATGCCGGTCATCTGGCGCAGGCCGGTGTGGATATCACG
CTGATTTACTCAGGGGCGCACAAGGTGGATGGCAATCAGTTTGAAGCCTTACCGGCAGAGGTTCGCCAGA
ACATGCAGCAGCGCATTGATGCGGCGCGCCGGATGTTTGCCGAAAAAGTGGCCATGTTTACCGGTCTGTC
TGTTGATGCCGTCACGGGAACAGAGGCCGCCGTTTTTGAAGGTCAGTCCGGCATTGATGCCGGGCTGGCG
GATGAATTAGTCAATGCGTCGGATGCCATCAGTGTGATGGCCACGGCGCTGAACAGTAATGTCAGAGGAG
GCACTATGCCGCAATTAACTGCAACGGAAGCCGCCGCGCAGGAGAACCAGCGAGTGATGGGGATCCTGAC
ATGCCAGGAAGCGAAAGGACGTGAACAGCTTGCCACGATGCTGGCAGGACAACAGGGCATGAGCGTTGAA
CAGGCCCGGGCGATTCTGGCCGCGGCGGCACCGCAGCAGCCGGTGGCATCCACGCAGAGTGAAGCCGATC
GCATTATGGCGTGTGAAGAAGCGAACGGTCGTGAACAACTGGCGGCAACGCTGGCGGCGATGCCGGAGAT
GACGGTGGAAAAAGCCCGCCCGATCCTGGCTGCTTCACCGCAGGCGGATGCCGGACCCTCACTCCGTGAT
CAGATCATGGCACTGGATGAGGCAAAAGGGGCTGAGGCGCAGGCTGAACAGCTGGCTGCCTGCCCGGGAA
TGACTGTGGAGAGCGCCCGGGCTGTGCTGGCTGCGGGATCAGGTAAGGCAGAACCGGTCTCTGCATCCAC
AACCGCCCTGTTTGAACGCATCATGGCGAACCATTCACCGGCTGCGGTACAGGGTGGCGTGCCACAGACG
TCAGCAGACGGTGATGCGGACGTGAAAATGCTCATGGCCATGCCATGAAGTCAGTGCTGACCATCAACAG
GAGGTTTTTACAATATGGTAACGAAAAACATCACTGAACAGCGTGCGGAAGTACGTATTTTTGCCGGTAA
TGATCCGGCTCATACAGCCACAGGCAGCAGCGGGATTTCCTCGGCAACACCGGCACTGACGCCCCTGATG
CTGGATGAAGCCAGCGGGAAACTGGTGGTCTGGGACGGACAGAAAGCCGGTAGTGCAGTTGGCATACTGG
TACTGCCGCTTGAAGGCACAGAGACGGTACTGACCTATTACAAGTCGGGGACCTTTGCGACGGAGGCAAT
CCGCTGGCCTGAAAGTGTGGATGAACACAAAAAGGCAAATGCCTTTGCCGGCAGTGCCCTGAGTCACGCG
GCGCTGCCGTAACACGTTATCAGGCCACCGCGGTGGCCTGACTGATTTCTGAATGAAAGGAACTGATTTA
TGGGATTGTTTACGACCCGCCAGTTACTCGGTTATACCGAACAAAAAGTGAAATTTCGTGCGCTGTTTCT
GGAGCTGTTTTTCCGCCGTACGGTGAATTTCCATACCGAAGAGGTGATGCTGGACAAAATTACCGGAAAA
ACGCCGGTGGCGGCCTATGTCTCCCCGGTTGTTGAAGGAAAAGTGCTGCGTCATCGCGGTGGTGAAACCC
GCGTGTTACGTCCGGGCTACGTCAAGCCGAAACACGAATTCCCCTGGAGCCGGTAAAAGGAGCCGGTACC
ACCCTGTGGGTTTATAACGGTCAGGGTGACGCCTATGCAAACCCGTTGTCAGACGATGACTGGCAGCGAC
TGGCTAAGGTGAAGGATCTGACGCCGGGCGAGATGACGGCAGAATCCTACGATGATAACTACCTGGATGA
TGAAGACGCGGACTGGACCGCGACCGGGCAGGGGCAGAAATCTGCAGGTGATACCAGTTTTACGCTGGCC
TGGAAACCGGGAGAGGAAGGCCAGAAAGGGCTTATAGGCTGGTTTGAAAGCGGCGATGTCCGGGCCTATA
AAATCCGTTTTCCGAATGGCACGGTGGATGTGTTTCGTGGCTGGGTCAGCAGTATCGGTAAGGCCGTGAC
GGCGAAAGAAGTGATCACCCGCACGGTGAAAGTCACTAACGTGGGTAAACCTTCTGTAGCGGAAGAACGC
AGCAAAATTACGCCGGTCAGTGCGATTAAGGTGACGCCGACATCCGGTACGGTGGCAAAAGGGAAAACAA
CCACCCTGACGGTTTCTTTTGAGCCGGAAAGTGCAACAGACAAGACGTTCAGAGCGGTTTCCGCCGATCC
GTCGAAAGCCACCATTAGTGTGAAAGATATGACAATTACGGTAAACGGCGTGGCGACAGGTAAGGTGCAG
ATCCCTGTGGTGAGCGGAAATGGTCAGTTCGCCGCAGTGGCTGAAGTCACCGTTACTGAAGCGGGCGCTG
CAGGGTAAACGGAGGTCATACATGTTTCTGAAAACAGAACAATTTGAATATAACGGTGTGTCTGTCACGC
TTTCCGAATTGTCTGCGCTGCAGCGTATCGAGCATCTTGCCCTCCTGAAACGGCGTGCAGAACAGGCAGA
ATCCAGCGGCAACCTGCAGGTAAGCGTGGAAGATCTCGTCAGAACCGGCGCGTTTCTGGTGGCGATGTCC
CTGTGGCATAACCATCCACAGAAAACGCAGTCACCGTCAATGAATGAGGCCGTGATGAAGATAGAGCAGG
AAGTGCTCACCACCTGGCCTGCCGATGCCATTGCCCGGGCGGAAGACGTGGTGTTGTGCCTGTCCGGGAT
GAGCGGGGCTGTTCGTCCGGATACTGATATTACTGAAGTGGCGAAAAATAACACGCTGACTGATGATGAT
TTTTCTGCGGGAAAGTCTTCGACGGCGAGCTGAACTTTGCCCTCAGACTGGCGCGTGAGATGGGGAGACC
CGACTGGCGCGCCATGCTTGCCGGGATGACATCCACCGAATATGCCGACTGGCACCGTTTTTACCGCACG
CATTATTTTCAGGATACCCAGCTGGATATGCATTTTTCCGGGCTGACGTACGCTGTACTCAGCCTGTTTT
TTTGCGATCCGGATATGCATCCCTCTGATTTCAGTCTGCTTGTCCCCCGGCATGAGGAAGAGCAGGTGGA
GAGGCCGGATGAGGACAAAATGCTGATGCAGAAAGCGGCAGGACTTGCCGGAGGCGTCCGGTTCGGTGGG
GACGGAGGGCGCGATATTTTATCGTCTGCGGATGTGGCGGATGTCATGGTGGATGATGCCGCATTAATGA
TGGCTTCAGCGGGGATTCCGGGAGGTGTGAGATATGTCCCAGCCGGTTGGTGATCTTGTTATTGACCTGA
GTCTGGATGCTGTCCGTTTCGATGAGCAGATGAGCCGGGTAAGGCGTCATTTTTCAGGTCTGGATACCGA
CGTCAGAAAAACCGCCAGTGCTGTTGAACAGGGCCTGAGCCGCCAGGCGCTGGCTGCACAAAAAGCCGGG
ATTTCCGTCGGGCAGTATAAAGCGGCCATGCGAACCCTGCCCGCACAGTTTACGGATATCGCCACGCAGC
TTGCCGGTGGTCAGAATCCCTGGCTGATCCTGCTGCAACAGGGCGGTCAGGTGAAGGACTCCTTCGGCGG
GATGATCCCCATGTTCAGGGGGCTTGCCGGTGCGATCACCCTGCCGATGGTCGGGGTCACCTCGCTGGCG
GTGGCGACAGGTGCGCTGGTGTACGCCTGGTACCAGGGAGATTCCACGCTTTCAGCGTTTAATAAAACCC
TGGTTCTTTCCGGTAATCAGTCCGGACTGACTGCCGATCGCATGCTGACGCTCTCAAGAGCCGGGCAGGC
AGCAGGGCTGACGTTTAACCAGGCGAGAGAGTCACTGGCAGCCCTGGTGAATGCCGGTGTGCGTGGTGGT
GAACAGTTTGATGCCATCAACCAGAGTGTCGCGCGTTTTGCTTCTGCATCCGGTGTGGAGGTGGACAAGG
TTGCAGAGGCTTTCGGAAAACTGACCACCGACCCTACGTCGGGGCTGATTGCGATGGTGCGCCAGTTCCG
TAACGTGACGGCAGAGCAGATTGCGTATGTTGCGCAGCTGCAGCGTTCCGGTGATGAGGCCGGGGCCTTA
CAGGCGGCGAACGATATCGCCACGAAAGGCTTTGATGAGCAGACCCGTCGCCTGAAAGAAAACATGGGGA
CACTGGAGACCTGGGCGGATAAAACCGGGAAGGCATTCAAATCGATGTGGGATGCCATTCTGGATATCGG
TCGTCCTGAGTCCTCAGCGGATATGCTCGCCAGTGCACAGAAGGCATTTGATGAGGCGGATAAAAAATGG
CAGTGGTACCAGAGCCGGAGCCAGCGCCGGGGAAAAACCGCCTCTTTCCGGGCCAACCTTCAGGGCGCAT
GGAATGACCGGGAAAATGCCCGTCTGGGGCTGGCAGCGGCCACGCTGCAGTCGGATATGGAAAAAGCCGG
TGAACTGGCCGCCAGGGACCGGGCCGAACGGGACGCATCACAGCTGAAGTATACCGGAGAGGCGCAGAAG
GCGTATGAGCGTCTGCTGACGCCGCTGGAGAAATATACCGCCCGTCAGGAAGAACTGAATAAGGCCCTGA
AAGACGGGAAAATCCTGCGGGCGGATTACAACACGCTGATGGCGGCGGCGAAAAAGGATTATGAATCGAC
GCTGAAAAAGCCGAAGTCGTCAGGAGTCAAAGTGTCAGCCGGTGAGCGTCAGGAAGACCAGGCGCATGCT
GCCCTGCTGGCGCTTGAAACCGAGCTCAGGACGCTGGAAAAACACAGCGGTGCGAATGAGAAAATCAGCC
AGCAGCGTCGCGATTTATGGAAAGCGGAAAATCAGTATGCGGTCCTGAAAGAGGCTGCCACGAAACGGCA
GTTATCTGAGCAGGAAAAATTCCTGCTGGCGCATAAAGACGAGACGCTGGAGTACAAACGCCAGCTGGCT
GAGCTGGGAGACAAAGTTGAACACCAGAAACGCCTGAATGAGCTGGCACAGCAGGCGGTGCGGTTTGAAG
AGCAGCAGAGCGCGAAGCAGGCCGCCATCAGCGCAAAAGCCCGCGGTCTCACTGACCGTCAGGCGCAGCG
GGAGTCTGAAGCGCAGCGTCTTCGGGACGTGTACGGTGATAATCCGGCTGCGCTGGCGAAGGCCACATCT
GCACTGAAGAACACCTGGTCTGCGGAGGAGCAGCTTCGTGGAAGCTGGATGGCCGGGCTGAAGTCCGGCT
GGGGCGAGTGGGCGGAAAGTGCGACGGACAGTTTTTCGCAGGTTAAAAGTGCTGCCACGCAGACCTTTGA
CGGTATTGCACAGAATATGGCGGCGATGCTGACCGGTGCAGAGGCAGACTGGCGGGGATTCACCCGTTCG
GTGCTGTCCATGCTGACAGAGATTTTTCTGAAGCAGGCGATGGTGGGGATAGTCGGGAGTATCGGCAGCG
CCATTGGCGGTGCTTTCGGTGGTGGTGCGTCTGCCTCCACGGGGACGGCCATTCAGGCTGCGGCGGCGAA
CTTCCATTTCGCGACCGGGGGATTTACGGGGACGGGGGGTAAATATGAACCTGCGGGAATTGTTCATCGC
GGGGAGTTTGTCTTCACGAAGGAAGCAACCAGCCGGATTGGCGTCGGCAACCTGTACCGCCTGATGCGCG
GCTATGCGGAAGGTGGTTATGTGGGTGGTGCCGGAAGTCCGGCGCAGATGCGGCGGGCGGAAGGTATTAA
TTTTAATCAGAACAATCACGTGGTGATTCAGAACGACGGCACCAACGGACAGGCGGGGCCGCAGCTGATG
AAGGCGGTGTATGACATGGCCCGCAAGGGGGCGCAGGATGAGCTCCGGCTGCAGTTGCGTGATGGCGGTA
TGTTATCGGGGAGCGGGCGATGAAAACCTTTCGCTGGAAAGTGAAGCCGGATATGGAGGTGAACTCGCAG
CCATCGGTGCGTGAAGTGCGTTTTGGTGACGGGTACTCACAGCGTATGGCGGCAGGGCTGAATGCTGACC
TGAAAACATACCGTGTGACGCTTTCCGTGACCCGGGAGGAGGCCCGGCATCTGGAAGCGTTCCTGGCAGA
GCACGGTGGCTGGAAGGCGTTTCTGTGGACACCGCCTTATGCCTGGCGGCAGATAAAGGTGACCTGTGCC
GCCTGGTCATCACGGGTTCGCATGCTGCGGGTTGAATTCAGTGCCGAGTTTAAGCAGGTGGTGAACTGAT
GCAGGATATTCACGAAGAAAGTCTGAACGAGTCGGTTAAATCAGAGCAGTCACCGCGGGTGGTGCTCAGG
GAAATTGACCTGACGGTGCAGGGCGGTGAGCGGTATTTTTTCTGTAATGAGCTGAATGAAAAAGGGGAGG
CGGTCACCTGGCAGGGGCGGCAATATCAGGTATACCCGATTGACGGCAGCGGTTTTGAGATGAACGGGAA
GGGCAGCAGTGCCAGACCGTCGCTGACGGTGTCCAATCTGTTTGGTCTGGTCACCGGGATGGCGGAGGAC
CTGCAGAGCCTGGTGGGGGCCACGGTGGTCCGCCGCCGGGTGTATGCCCGTTTTCTGGATGCGGTGAATT
TTGTGGCGGGCAATCCGGAAGCGGACCCGGAGCAGGAGCTGAGCGACCGCTGGGTGGTGGAGCAGATGTC
AGAGCTGACGGCCATGACAGCCTCGTTTGTGCTGGCCACACCGACGGAGACGGACGGAGCGCTGTTTCCC
GGTCGCATTATGCTGGCGAATACCTGTATGTGGACCTACCGCTCTGATGAGTGTGGTTACACGGGCGGGG
CTGTGGCGGATGAGTTCGATAAACCCACCACCGATATCCGTAAGGACAGATGCAGCAAGTGCATGCGCGG
GTGTGAGATGCGCGGCATGGTGGCTAATTTTGGCGGTTTCCTTTCCATTAATAAACTTTCGCAGTAAATC
CCGGTTTATGACACAGACTGAATCAGCGATTCTGGCGCATGCCCGGCGGTGTGCGCCTGCGGAGTCGTGC
GGCTTCGTGGTGAGAACGCCGGAGGGGGAGCGGTATATCCCTTGTGTGAATATCTCTGCAGAGCCGGAGG
CGTATTTTCGTATTGCACCGGAAGACTGGCTGCGGGCAGAGATGCAGGGGGAGATTGTGGCACTGGTCCA
CAGTCATCCCGGTGGTCTGCCCTGGCTGAGCGAGGCCGACCGGCGGCTGCAGATAAAAAGTGCACTGTCC
TGGTGGCTGGTCTGCCGGGGGGAAATTCATAAATTCCGCTGTGTGCCACATCTGACAGGACGGCTCTTTG
AGCACGGGGTGACGGACTGTTACACGCTGTTCCGGGATGCATACCATCTGGCGGGAATTGATATGCCGGA
TTTTGAGCGTGAGGATGACTGGTGGCGCAATGGTCAGAACCTGTACCTGGACAATATGGAGGCGACTGGT
TTTTACAGGATTTCCCTGCCTTCCGCACAGCCTGGCGATATCCTGCTGTGCTGCTTTGGCGCATCGGTGG
CCAATCATGCCGCCATATACTGCGGCAACGGTGAACTGCTTCACCATCTGCCTGAACAACTGAGTAAACG
GGAGAGGTATTCCGAAAAATGGCAACGACGAACGCATTCAGCCTGGCGTCACCGCCACTGGCACGTATCT
GCCTTCACGGGGATTTACAACGATTTGGCCGCCGCCTCAGCCTGTATGTGAACACGGCAGCGGAAGCCAT
CCGTGCCCTGTCGATGCAGATGCCGGGATTCCGCCGTCAGATGAACGAAGGCTGGTACCAGATACGTATT
GCCGGTGATGACACGGCACCGGAGGCGGTGTACGCCCGTCTTCACGAACAGCTGGGTGAGGGAACGGTCA
TCCATATTGTGCCGCGACTGGCCGGGGCCGGAAAGGGTGGACTGCAGATTGTGCTGGGGGCGGCAGCCAT
CGTGGGCTCTTTCTTCACTGCCGGGGCATCAATGGCGTTATGGGGTTCAGCCCTGGCAGCCGGTGGTTTT
TCTGCCACCACGATGCTGTTTTCACTTGGAGCCAGCATGATTCTGGGCGGTGTGGCCCAGATGCTGGCCC
CGAAGGCAAAAACACCGGATTACCGCGCAACGGATAACGGCAGACAGAACACGTACTTTTCCTCGCTGGA
TAACATGATTGCCCAGGGGAACCCGATGCCGGTGCCTTACGGGGAAATGCTGGTTGGCTCCCGGCGAATC
TCCCAGGACATCAGTACCCGTGATGAAGGCGGTGACGGGAAGGTGGTGGTTATCGGGCGGCAGGCATAAA
AGCGAAAAAATCCCGCAGTGCTCACGGACAGGAACTGCGGGAGCGTTACGAAGATTGAGTGTAAGGAATT
ATTCTTATGTCACGACAAAAACATTAACTCAGAGAGGGAGGATGTGCCGTTCTTTTCAGGGAGAAAGGAT
TTATCGTCCTGAGGAATAAAGGTAAGGGGCCCGCCCCTTACCTGACTGATTATTGAATGATGCCGCAGGC
CATTCTCGCACCACCACCGCCCAGGGGCTCCGGATGGTCATGATGGTTATCACCGCCAGCATGAAGCATG
AGAGAACGCCCTTTAATCTCTTTTAATGAGTTCAGTCTCGGGGCCAGGACCGGGTAGTTCGCTTTTCCGT
CATGCGTCACGAACAGCGCAGGGAGGTCGCCCGGGTGTCCATCCGGAGACCAGGGGCCAAGATGTTTGCC
GGTGTTTTTCGGGTCAAAGTGACCGCCAGCCGATAATGCTGCGACCGGTTTTCCGTCTTTCAGTGCCGGG
GCGCAATTTCCTTTTTCGTGCACATGAAAACCATGAATGCCTTCAGACAGAGAGTGAAGGGCTGGTGTGA
ACAGCAGACCGTAGGGGGTCTCCTGAATGGTTATTTTTCCAATGCTGACTTCTTTTCCGTCAGCACTGAC
AAGGTTCATTGGGACTTCCTGTTCTGCTGCGTATCCGCATGATGCTGCTGTCAGCATGGCAATGGCAGCA
ATGATTTTACATTTCATAAAACCCTCATTAATTCCGTTAACAGACTGAGCTTGCTGGTTACAGGGTAACA
AACAGCGTTCTGATGATATCGCGCAATAGCTGTGCAATATCCTATCACTGCGATTAATAATACCAATTGA
GAGGAACATTATGGGTAAAGGTGGCGGCAGGGCGCACACGCCGGTTGAGGCAAAGGACAATCTTAAGTCC
ACGCAGATGATGAGCGTGATTGATGCCATTGGTGAAGGGCCGATTGAAGGTCCGGTGAAGGGGCTGCAGA
GTATCCTGGTGAACAAAACCCCGCTGACGGACACGGACGGTAATCCTGTGATACATGGTGTGACCGCGGT
CTGGCGCGCCGGGGAGCAGGAGCAGACACCACCTGAAGGCTTTGAGTCCTCCGGGGCGGAAACCGCACTG
GGCGTGGAAGTGACGAAGGCAAAGCCGGTGACGCGCACCATTACGTCCGCGAACATTGACCGCCTGCGGG
TCACCTTCGGGGTGCAGTCACTGTTGGAGACCACCTCAAAGGGCGACCGTAATCCCTCTTCTGTCCGACT
GCTGATTCAGTTGCAGCGTAACGGTAACTGGGTGACGGAAAAGGATGTCACCATTAACGGCAAGACCACC
TCGCAGTTTCTGGCGTCGGTGATTCTGGATAATCTGCCTCCCCGTCCTTTTAACATCCGGATGGTCCGGG
AGACGGCGGACAGCACCTCGGACCAGCTGCAGAATAAGACGCTCTGGTCGTCATACACCGAAATCATCGA
TGTGAAACAGTGCTACCCGAACACGGCGATTGTGGGGCTGCAGGTGGATGCGGAGCAGTTTGGTGGCCAG
CAGATGACGGTGAACTACCATATCCGAGGTCGCATCATCCAGGTGCCGTCAAACTATGACCCGGAAAAAC
GCACGTACAGCGGCATCTGGGACGGCAGCCTGAAACCGGCATACAGCAACAACCCGGCCTGGTGCCTGTG
GGACATGCTGACTCACCCGCGCTACGGCATGGGAAAACGCCTGGGGGCGGCGGATGTGGACAAGTGGGCG
CTGTATGCCATTGCGCAGTACTGCGACCAGATGGTCCCTGATGGTTTCGGGGGCACAGAGCCGCGGATGA
CCTTTAATGCGTACCTGTCACAACAGCGTAAGGCGTGGGACGTTCTCAGTGATTTCTGCTCGGCGATGCG
CTGTATGCCGGTATGGAACGGCCAGACGCTGACGTTCGTTCAGGACAGCCCGTCGGATGTGGTGTGGCCG
TACACCAACAGTGATGTGGTGGTGGATGATAACGGCGTGGGGTTTCGCTACAGCTTCAGCGCCCTGAAGG
ACCGCCACACGGCGGTGGAGGTGAATTACACCGACCCGCAGAACGGCTGGCAGACCTCCACGGAACTGGT
GGAAGACCCGGAAGCCATACTGCGCTACGGGCGCAACCTGCTGAAGATGGATGCGTTCGGTTGCACCAGT
CGCGGTCAGGCCCACCGTGCCGGGCTGTGGGTGATAAAGACCGGACTGCTGGAAACGCAGACGGTGGATT
TCACGCTCGGGTCACAGGGGCTGCGTCACACACCCGGTGACATTATTGAAATCTGTGATAACGACTATGC
CGGGACCATGACCGGCGGACGTGTCCTGTCCATCGATGCCGCCAGCCGCACCCTGACACTGGACCGTGAG
GTGACCCTGCCGGAGACCGGTGCCGCCACGGTGAACCTGATTAACGGCAGCGGTAAGCCGGTGAGCGTGG
CCATCACTGCACACCCCGCGCCGGACCGGATACAGGTCAGCACCCTGCCGGATGGCGTGGAGACATACGG
TGTGTGGGGGCTCTCCCTGCCGTCACTGCGTCGTCGCCTGTTCCGCTGTGTCTCCATCCGGGAAAACACG
GACGGCACCTTTGCCATCACGGCAGTGCAGCACGTACCGGAAAAAGAAGCCATCGTGGATAACGGTGCCC
GCTTTGAGCCGCAGTCAGGCACCCTGAACAGCGTCATCCCTCCGGCAGTGCAGCACCTGACGGTGGAGGT
GAGCGCAGCTGACGGCCAGTATCTGGCGCAGGCTAAATGGGACACGCCGCGGGTGGTGAAGGGCGTGCGC
TTCAGTCTGCGCCTGACCAGCGGAAGCGGAGAAGGCAGCCGTCTGGTGACCACCGCCATCACTGCGGATA
CAGAGCATCGTTCCAGTGGTCTGCCGCCGGGGGAATACACCCTGACGGTCAGGGCGATTAACAGTTATGG
CCAGCAGGGGGAACCGGCCACCACCACGTTCAGGATTAATGCACCTGCGGTACCCGCCACGATTGAGCTG
ACACCGGGCTATTTTCAGATAACAGCGGTCCCGCGTCTTGCGGTGTATGACCCGACGGTACAGTTTGAGT
TCTGGTTTTCGGAGACAAAAATCGCAGATACATCTCAGGTGGAAACCTCTGCCCGTTATCTGGGGACCGG
CAGTCAGTGGAGTGTATCCGGCCCGCACATTAAGCCCGGGAAGGATTTCTGGTTTTACGTGCGCAGCGTC
AACCTGGTGGGGAAATCTGCTTTTGTGGAAGCCAGTGGCCGGGCCAGCAATGATGCAGAAGGGTATCTGG
GGCTGTTTCGGGAAAAAATAGGAAAACTGCATCTGGCTCAGGGGCTGTGGGAGCTGATAGACAACAGCCA
GCTTGCGGATGAGATGGCGGAGATGAAGACCTCCATCACCGAAACCCGCAATGAAATCACACAGACGGTC
AGTAAAACGCTGGAGGACCAGAGCGCCATCATACAGCAGATACAGCGCGTGCAGAAGGACACAAATGATG
ACCTTGCTGCACTTTACATGCTGAAGGTACAGAAAACAAAAAATGGCATACCCTATGTTGCCGGTATTGG
AGCGGGGATTGAGGATACTGATGGCCAGCCCCTGAGCAACATACTGCTGCTGGCTGACCGTATTGCGATG
ATTAACCCGGAGGACGGCAACACCACGCCGTTATTTGTGGCGCAGGGGAATCAGTTGTTCATGAACGATG
TGTTCCTGAAACGACTGTTTGCGGTGAGTATCACGTCATCCGCCAATCCCCCGACGTTTTCCCTGACGCC
GGAGGGCAGGCTGACCGCAAGAAATGCTGATATCAGCGGTAACGTGAATGCGAATTCCGGGACGCTCAAC
AACGTCACGATTAACGAGAACTGTCGGGTTCTGGGAAAACTGTCCGCGAACCAGATTGAAGGCGATCTCG
TTAAAACAGTGGGCAAAGCTTTCCCCCGGGATTCCCGTGCACCGGAGCGGTGGCCATCAGGGACCATTAC
CGTCAGGGTTTATGACGATCAGCCGTTTGACCGGCAGATTGTTATTCCGGCGGTGGCATTCAGCGGCGCT
AAACATGAGAGAGAGCATACTGATATTTACTCCTCATGCCGTCTGATAGTGCGGAAAAACGGTGCTGAAA
TTTATAACCGTACCGCGCTGGATAATACGCTGATTTACAGTGGCGTTATTGATATGCCTGCCGGTCACGG
TCACATGACGCTGGAGTTTTCGGTGTCAGCATGGCTGGTGAATAACTGGTATCCCACAGCAAGTATCAGC
GATTTGCTGGTTGTGGTGATGAAGAAAGCCACCGCAGGCATCAGTATCAGCTGAATTTTATAACCCATAT
ACGGGCGCCAGAAATGGCGCCTTTTTTATTGCAGAAAAGCGAGAGGTAATTATGCGTAAACTTTATGCCG
CCATTTTGTCCGCAGCCATTTGTCTGGCCGTATCCGGTGCGCCTGCATGGGCGTCTGAACATCAGTCAAC
GCTGAGCGCGGGGTATCTTCATGTCTCGACGAACGTTCCTGGCAGCGATGAACTGAACGGGATTAACGTG
AAATACCGTTATGAGTTTACGGACACACTGGGGATGGTGACGTCGTTCAGCTATGCAGGAGACAAGAATC
GCCAGCTGACCCGTTACAGCGATACCCGCTGGCATGAAGATTCCGTTCGTAACCGCTGGTTCAGCGTAAT
GGCGGGGCCGTCTGTGCGCGTGAATGAATGGTTCAGCGCGTATGCGATGGCGGGTGTGGCTTACAGCCGT
GTGTCGACTTTCTCCGGGGATTATCTCCGCGTAACTGACAACAAGGGGAAAACGCATGATGTGCTGACCG
GAAGTGATGACGGTCGCCACAGCAACACGTCTCTGGCGTGGGGAGCTGGCGTGCAGTTTAACCCGATCGA
ATCCGTGGCCATTGATATTGCTTATGAAGGCTCCGGCAGTGGCGACTGGCGCACTGACGGCTTCATCGTG
GGTGTCGGCTATAAATTCTGATTAGCCAGGTAACACAGTGTTATGACAGCCCGCCGGTTCAGGCGGGCTT
TTTTGTGGGGTGAATATGGCAGTAAAGATTTCAGGTGTACTGAAAGACGGCACAGGAAAACCGGTAGAGA
ACTGCACCATTCAACTGAAAGCCAGACGTAACAGCGCCACGGTGGTGGTGAACACGGTGGCCTCTGAAAA
TCCGGATGAAGCCGGTCGTTACAGCATGGACGTTGAGTACGGTCAGTACAGCGTTATTCTGTTGGTGGAA
GGGTTCCCGCCGTCACATGCCGGGACCATCACCGTGTATGAAGATTCTCAACCGGGGACGCTGAATGATT
TTCTCGGTGCCATGTCGGAGGATGACGTCCGGCCGGAGGCACTGCGTCGTTTTGAACTGATGGTGGAAGA
AGCGGCGCGTCACGCTGAGGAGGCGAAGAAGAATGCCGGAGAGGCGGAGACGTCCGCGAGGAATGCCGGC
ATATCAGCCAGTCAGGCAGAAGAGAGCGCGGCAAATGCTGACACTTCAGCAGGGGATGCATCGGAGTCAG
CCCGGCAGGCGGCAGAAAGTGCAGCCGCTGCAAAGCAGTCAGAGGAGGCGTCCTCGTCCTCGGCTTCTGC
GGCCGCTCAAAAAGCCAGTGAGTCATCACAAAGTGCAGCAGAAGCTGAATTGTCAAGAAAGACGGCAGAA
AGTGCAGCCGGTAATGCAGCCAGGGATGCAACGACCGCAACAGAAAAAGCCCGGGAGTCAGCAGAAAGCG
CACAGTCAGCGGAACAAAGCAGGATAGCGGCGGAAGAAGCCGTAAACCGAATCCCCACCGTGGTGGGACC
TCCCGGGCCAAAGGGGGAACCGGGTCCCGCGGGTCCTCAGGGGCCGAAGGGAGATAAAGGAGAGCGTGGC
GACACCGGCCCGGCAGGGGCAACCGGCGAACGGGGACCGGCAGGTGATGCTGGTCCGGCAGGCCCGCAGG
GGCCGAAAGGTGACAGGGGAGAGCGGGGAGAGACCGGTCTGACGGGAAATGCAGGTCCACAGGGTCCAAA
GGGAGACACCGGGGCAGCAGGCCCGGCAGGCCCACAGGGACCGAAAGGAGAAACAGGTGCGGCTGGCCCG
GTGGGGGCAACCGGACCTCAGGGACCGAAGGGCGACCCGGGGGAGACACAAATCCGTTTTCGTCTGGGGC
CGGCGAGCATTATTGAGACAAACAGCCATGGCTGGTTCCCGGGTACAGATGGTGCGCTCATCACCGGACT
GACCTTTCTTGCCCCCAAAGATGCCACACGGGTTCAGGTTTTTTTTCAGCATTTGCAGGTCAGGTTTGGT
GACGGGCCGTGGCAGGATGTTAAGGGGCTGGATGAAGTGGGCAGTGATACAGGCAGAACAGGAGAATGAC
ATGAACATATTAAAAAAAATTATGCAGCGTCTGTGCGGTTGCGGAAAGCATGATGACTGTGAACACGGGC
AGTCGCTTACAGTACAACTGCGACTGGGGCCGGCAGACATCCTGGAGTCAGATGAGAATGGCATTATTCC
GGAGCAGGACGGGGTAATCACGCAGGTGGTGATACTGGATGCAGATAAAAAGCAGATACAGTGTGTGGTA
AGACCGCTGCAAATTCTGCGTGCTGACGGGAGGTGGGAAAATATTGGCGGAATGAAATAG
>5 1245903-1316397
ACCGCCTGCTTTTTCAAATAATTGCGGCGACATGGTTTCCGGTACACGCTTAACGACAACTTCAGCGCCA
TCCACTTTGCTTGCACCCTCAGCGACTGCGCGTGCCATCGTTTCAACATGTCTAAGGATATGGTTTATCA
TTTTGAAAAATATAATTTTATTTCATCCTCCTGGTCACTTTGGGGCACGTCTGGGGCACGGGCATTAAGG
ACATTATTCAACATGGCAACTTGAGTCACGCTGCACTCAGGCATCCATGCACCATAAACATTGTAGACCA
TGCTGGCGCTGGAGTGCCCCATCTGTGATGCAATAAATGTCGGGTTTGCTCCGGAAGATAAAGCCCAGCA
CGCATAGGTATGGCGTGACTGATACGCTTTACGGGATCGGATACCCGCTCTTTTTATTGCTGAATCCCAT
GTCGCTCCGATGGAGCTTACCGCGTAGTTAATACCCGCCTTGTGATTCTTGCGAACGATTTGCGGACAGA
AAACAAAAGTGCACTCGTGCAAAATTGTTCTTCCGTACTCGCGTAATTGAACAGTGATCTGATGCTGCCT
GCTAAGACGAGTAAGCATCGCCTGGTTTTTAAGTGCTTCAATTGCTGGTGCCAGAAGATGTATAACCCGG
TTAGTGCCTGCGTCGGTCTTTGGTAGCGTAAAATCACCTATTTTTGTAAAATTTCGTCGCACTGTTATCG
TGCCAGCTTTCAGGTCGATATCCTCCCATGCAAGTGCGGCAATTTCACCGTGTCGCATCCCTGTAAAAAC
AGCCACTGTCCAGAGGTTTTTGGTCTGTTGATGATGGCAGGCATCAATGAGACGGCTAAACTCATCTCTG
GTCAGTGGATCCGGCACTGGTTTTGATTTCCTCAGCGGTGTTATTGAATTAAACGGGTTTTTCTCCAGAT
ACCCGTTTTCGGCGGCAAAGCTGAACATTCCGGCTGTTGTTGTCATGTAATAGTTCACTGTGGGTACGGT
TCTTCCTTTTCGGGACGTGCTGGTTTTCCTGCTTCCCTTTTCCCCGGTCAGTAAATCTTTCCTGATAAAC
AGCAGATCTTCTTTTGTAATCGATGACGCCAGCCTGCCAGGACCAAGCCTCGGTAGCATATTTTTCATCA
CTGATTGATAACGATTTAAGGCGTTACTACCGATTTCCATTGCTTTCAGAGTAAGCCATTTCTGTGCCAG
TTCACCGACGGTGATATCTTTTTTTACCAGGCCAAATAGCTTCAGGTTAGGTGAGTCAGGGAATCGATCG
GCATAATCAAACGTTCCTGTTCTGATTGCAAAGCAGACCGAAGCCCTTAACTCACCAGCGATCTTTCTGT
TTTTCGGTGTATCGGGCACGCGAAGATTTTCGCGCACTCGTTTACCCCTGTACTTAAACGTTATTCGGAG
TTTTCCTCCGTGATTTTCAACGCCGGCTGGATAGGCTGAATTCGCCATTGTTCCTCCTGCGTCCAAGAGC
ACGCTCAGGTTATACTCTTATGGACAAGAATTAAACATCCTGAGATGGTAAGGGTTGGTTTTTGATCCAA
GTGTTGATGGTAGGAAGATGATAGAGACATTCGCTGTTTTTCTTTGGCGTTCCGTCGGGGGCGATTTGTT
TATATTCTCTGCCGTTCATCCACGCACTGTCCCTGGCGCGTAATATTGTTCCTTTTCTCAGGCCTGTTAC
AGCCATTAAAAGCTCCAGTGTTACCCATTCATTCGCATTTATCTGTACAACAGGTGTGATGACTGGCTGA
ATGCCATGGTTATGTTGGTTTACTAACTCGCGCATAAGTTGCCTCTGCATGTGTAAGAAAAAACCGCCAT
CAGGCGGCTTGGTGTTCTTTCAGTTCTTCAATTCGAATATTGGTTACGTCTTATTCGATGCGCACTCCTG
GTATTTCGCCTTTTGATATTGCTAAGTCATAAATTTGCGCGGCACTATACCCATCTCGCATCCATGAATC
TAAGGCGCGAACAGCCTCGCTACGCTTTTTATCTTCTCTCTCATTTTTGATATCAACGAGGACATCAACG
CAATTAAGGCAAATGTGGATTTTGTCTTTACATTCGATCATGGCGGCTTTGCCATGATTTCCGCCACACA
GTGAGCATAAATCTTCAGGGTCTGGCTGGTATTTCTGTAACGTTAGAGGGTTGAATGTTGAACAGGCCAT
AATCATCTCCATAAAACAAAACTCGCCGTAGCGAGTTCAGATAAAAGAAATCCCCGCGAGTGCGAGGATT
GTTATTCATTGCCGATATTCACCTTTATCGCGAACACCTTTACCGGTTTATCACCGAAGTGCGGATGTGT
GATTGTCTTGATTTCATATCCGTCATACGGAACATCAATTCTTCGGCTGGAATCGTCGCGCTTCGGATAT
CCCTTTGTGATAATCAGGCGGTCATACTCGCGGAACATAATTCGCTTATTCCAGTAGTCATTAAACAGGC
GATACTCTTCCGTTTTCTCTCCGCGAATCATGGCATCGAAGTATTCACCTTTAACGGCAAGTTGCAGGTT
AGCCACGGTTAACCTCCTGCGGCGGTTCTGGTAGCGGCATCCAGTGAGTTGCTTGCTCAATACCATTACC
CGGCTTAATCGTTGCATCTCCGCGCCGAAAGGTGCTTCCGGTATAGCGTGCGGAGCATATTAGCGGTTCA
ACCAGAGAGCTATCGAAATTCACCGAAATAAGCACGTTCTGGCCCTTTTCAGGCATTCGATCACTACAGC
TTATCCAACTATCCGGAGTTACCGGAGAGTTACCAGCCTCATAAGCGGATTTCATCCAGTGCGTAAGCGT
TTCGATGCTTACACATCCGCAATCAACGTCTATTTTTTCTTTTTGTTCTGACAACCATTCCTGGAATGAC
AGCTTGGCAGTCTGGCTTGCTGGATCAATTCGTGGCAGGCCGATATATAGTGGTACATTTCCCGGCTCCA
TCGAATTGTCGGGACAAATAAACGTGTTACAACCATATTTAACGAGCTCAATTCCCACTGTGTCGATAGT
GGCGAATGGTTCAGTGGTCAATGCAGTCAACGCAATTTCATAAGCACGGCGCTCAATATTATCTCGCACG
TCCAGGCTGCCGATTCGCTCTTTGATTTCTTTAATCATTTCTTTGTCGGTGAACGTTGTCATGTGTTAGT
CCTTATCCACTTCAACGCCATCTTTCAGCGTGATGCCGTGCCAATCATCAGCCCAACTGGTTAACCCAGG
CGCATCAATGCTAGGCATATAGACGCTTGCAGTGTGGTAGCCCTTATCGTTATCAATGCTGGCAACGTGC
TCGCCGTTGTATGCGCTCAGCGTGTCTAGGACACTATAAAACTTTCCTCCGGCTGCCCTGAAATCCTTTA
CAGCCTTCACAAGACGATTCCACGCTTTTTCCTGTTCTGGCGTCAGGTCGATTAATTCCTGCAAAGTTGC
CATTTCAGTTTTCCTTATATGGGTTAATTTTATTGTGCAGTGTGTTGAACGACGCCCATACCACGTCGTT
ATACAACTCAATAACTAGCTCAATTATTTTCCCGATTGCCCAGACAAAAATTAGCGGGGATATCGGTGTC
ATCAACACGATAAACAGAATGAGAAACAAAAATTCTGTCGCTCTACTTTTTCGCGGATATTCTTTTCTGA
ATAATGTAGGCACATCACTCTCCTTTGTTGCTCCTCAAAATTTTATGCCCTGGCGCAAAAGCACGCGTTT
TGTCTTTGCTTATTCGCCAGCCATCCTTGCGCGCCTCTTTTGCACAGCCAGCCCATGACGTACCGATATA
CTCACCGAAGTCTGGCGACTTATATTTGCCATCTGTACACTGGAGGCAATCACAATAGAGATGCATGGTG
TAACTTGCAGCAATAGCCATATCACTCTCCTTTAGTGCGCAAGTGGTTTTTCCAGCGGTTTTGCTCCGCG
CTGGGCTTTTTGCAAAAACCACAATCCATCATCCCGTAATATTTCATCAACCCCATCCGTCGGTTGCTGA
GTCTCACCCACTGCCAGACGCCAGGAGCGTTTCTACGAACTAACAGAATCTTTGCTTTACGGTTTTTCAT
CGTTTTGCTCTCCTGCATCTCTTTGCTGCTCGTCGTGCCGCTGCAATACCGGTATGGCGGCGCTTTGGTG
TCGGGATGATGTTCTTTGCAATTAGCGCAGAAGCCCAAAAACGAGTCGGATACGGTAACAAGCCGATACA
TGCCACACGCATTACTCACCTCTTTTGATGCGAATGCCAGCGGCGCGCTCGGCTTCACTTTGTTCCCAAA
ACCACTTGTGAAGCGCCATAAGCTTTTCGTCAATCGGTGCATATTTGCGATTAAAGTAGGCCTGAGCATC
TTTCTCAGATTCGTCCGGTAATTCGCCAGGGCCAAACAGTGTGTTATAAATCCATGCTAGTCCGCTCTTA
GCGTCGCCAGTTGCCTGCCATTCGATAATGGCAGCCTGCATGACCAGAATGTTTTTCCCGATTAATAGGT
CCAGTTCTTTGTACCGGTTGCGGATGTATGCATTCTCGCTTTGTAATTTTGCGTTGCGCTTTTCTGAGGC
TTCAAGTAACGCCTGCTTATCGCGTAGAGCTTCTTCCAGTTCAGCAACATGGCATTCACTATCAATAAGG
TTGTTCTCTGCTGCTTCAAGCTCAACACGCAGCTTCCCAACCGTAAGCGCAATCTCCTCGTTCTCCTGGT
CGCGGCGTTTGATGTATTGCTGGTTTCTTTCCTGTTCATCCAGCAGTGCCAGCACGGTAGCCGGGTTAGC
CTCTGCTATGAATTCAGCGTTTGCATAAGCCTGATCATCTGATTCAATCAGGCAGTTAACATGACATTCC
GCAATCACGCCACCGGGTTCTCCTTTCCATTTTTGGCAAACAAAAACTCCTGTTAAATTGCCGTGCTGGT
TAACAGATGTATGCCCTACGATGTAGCTTCCTTTAGTTGCTTTCTCTGCCTTTTCACGCAGTGCCTGATA
ATTAATTTCGCTCACTTCGAACCTCTCTGTTTACTGATAAGCTCCAGATCCTCCTGGCAACTTGCACAAG
TCCGACAACCCTGAACGGCCAGGCGTCTTCGCTCATCTATGGGATCGCCACACTCACAACAATGAGTGGC
AGATATAGCCTGGTGGTTCAGGCGGCGCATTTTTATTGCTGTGTTGCGCTGTAATTCTTCAATTTCTGAT
GCTGAATCAATGAGGTCTGCCATCTTTCATTAATCCCTGAATTGTTGGTTAATACGCTTGAGGGTGAATG
CGAATAATAAAAAAGGAGCCTGTAGCTCCCTGATGATTTTGCTTTTCATGTTCACCGTTCCTTAAAGACG
CCGTTTAACATGCCGATCGCCAGACTTAAATGAGTCGGTGTGAATCCCATTAGCGTTACCGTTTCGCGGT
GCTTCTTCAGTACGCTACGGCAAATGTCATCGACGTTTTTATCCGGAAACTGCTGTCTGGCTTTTTTGAT
TTCAGAATTAGCCTGACGGGCAATGCTGCGAAGGGCGTTTTCCTGCTGAGGTGTCATTGAACAAGTCCCA
TGTCGGCAAGCATAAGCACACAGAATATGAAGCCTGCTGCCAGAAAAATGCATTCTGTTGTTGTCATGCC
GGGTCTCTCTCGTTTGCTTCTGCTTTCGCCGCCATCATTTCCAGCTTTTGTGAAAGGGATGTGGCTAACG
TATGAAATTCTTCGTCTGTTTCTACTGGTATTGGCACAAACCTGACTCCAATTTGAGCGAGGCTATGTGC
CATCTCGATACTCGTTCTTAACTCAACGGGAGATGCTTTGTGCATACAGCTCCCCGTTTATTATTTATCT
CCTCAGCCAGCCGCTGTGCTTTCAGGGGATTTCTGATAACAGAAAGGCCGGGAAATACCCAGCCTCGCTT
TGTAACGGAGTAGACGAAAGTGATCGCACCTACCCGGATATTATCGTGAGGATGCTTCATCGCCATTGCT
CCCCAAATACAAAACCAATTTCAGCCAGTGCCTCGTCCATTTTTTCGATGAACTCCGGCACCATCTCGTC
AAAACTCGCCATGTACTTTTCATCCCGCTCAACCACGACATAATGCAGGCCTTCACGCTTCATACGTGGG
TCATAGTTGGCAAAGTACCAGGCATCTTTTCGTGTCACCCACATGCTGTACTGCACCTGGGCCATGTAAG
CCGACTTTATGGCCTCGAAACCACCGAGCCGGAACTTCATGAAATCCCGGGAGGTAAACGGGCATTTCAG
CTCAAGGCCATTGCCGTCACTGCATAAACCATCGGGAGAGCAGGCGGTACGCATACTTTCGTCGCGATAG
ATGATCGGGGATTCAATAACATTCACGCCGGAAGTGAACTCAAACAGGGTTCTGGCGTCGTTCTCGTACT
GTTTTCCCCAGGCCAGTGCTTTAGCGTTAACTTCCGGAGCCACACCGGTGCAAACCTCGGCAAGCAGGGT
GTGGAAGTAGGACATTTTCATGTCAGGCCACTTCTTTCCTGAGCGGGGCTTTGCTATCACGTTGTGAACT
TCTGAAGCGGTGATGACGCCGAGCCGTAATTTGTGCCATGCATCATCCCCCTGTTCGACAGCTCTCACGT
CGATTCCGGTACGCTGCAGGATAATGTCCGGTGTCATGCAGCCACCTTCTGCTCAGAGGCTTTCTGTTTC
AGGAATCCAAGAACTTTCACTGCTTCGGCCTGTGTCAGTTCTGACGATGCGCGAATGTCGCGGCGAAATA
TCTGGGAACAGAGCGGCAATAAGTCGTCATCCCATGTTTTATCCAGGGCGATCAGCAGAGTGTTAATCTC
CTGCATGGTTTCATCGTTAACCGGAGTGATGTCGCGTTCCGGCTGGCGTTCTGCAGTGTATGCAGTATTT
TCGACAATGCGCTCGGCTTCATCCTTGTCATAGATACCAGCAAATCCGAAGGCCAGACGGGCACACTGAA
TCATGGCTTTATGCCGTAACATCCGTTTGGGATGCGACTGCCACGGGCCGGTGATTTCTCTGCCTTCGCG
GGTTTTGAATGGTTCGCGGCGGCATTCATCCATCCACTCGGTAACGCAGATCGGATGATTACGGTCTTTG
CGGTAAATCCGGCATGTACAGGATTCATTGTCCTGCTCAAAGTCCATGCCATCAAACTGCTGGTTTTCAT
TGATGATGCGGGACCAGCCATCAACGCCCACCACCGGAACGATGCCGTTCTGCTTATCAGGGAAGGCGTA
AATTTCTTTCGTCCACGGATTAAGGCCGTACTGGTTGGCGACGATCAACAATGCGATGAACTGCGCATCG
CTGGCATCACCTTTAAATGCCGTCTGGCGAAGAGTGGTGATCAGTTCCTGTGGGTCGACAGAATCCATGC
CGACACGTTCAGCCAGCTTCCCTGCCAGCGTTGCGAGTGCTGTACTCATCCGCTTTATACCTCTGAATCA
ATATCAACCTGGTGGTGAGCAATGGTTTCAACCATGTACCGGATGTGTTCTGCCATGCGCTCCTGAAACT
CAACATCGTCATCAAACGCACGGGTAATGGCTTTTTTGCTGGCCCCGTGGCGTTGCAAATGATCGATGCA
GAGTGATTCAAACAGGTGCTGGGGCAGACCTTTTCCCATGTCGTCTGCCAGTTCTGCCTCTTTCTCTTCA
CGGGCGATCTGCTGGTAGTGACGCGTCCAGCTCTGAGCCTCAAGACGATCCTGAATGTAATAAGCGTTCA
TGGCTGAACTCCTGAAATAGCTGTGAAAATATCGCCCGCGAAATGCCGGGCTGATTAGGAAAACAGGAAA
GGGGGTTAGTGAATGCTTTTGCTTGATCTCAGTTTCAGTATTAATATCCATTTTTTATAAGCGTCGACGG
CCTCACGAAACATCTTTTCATCGCCAATAAAAGTGGCGATAGTGAATTTAGTCTGGATAGCCATAAGTGT
TTGATCCATTTTTTGGGACTCCTGGCTGATTAAGTATGTCGATAAGGCGTTTCCATCCGTCACGTAATTT
ACGGGTGATTCGTTCAAGTAAAGATTCGGAAGGGCAGCCAGCAACAGGCCACCCTGCAATGGCATATTGC
ATGGTGTGCTCCTTATTTATACATAACGAAAAACGCCTCGAGTGAAGCGTTATTGGTATGCGGTAACGCC
GCGCTCAGGCGGCTTTGATAGTCATATCATCTGAATCAAATATTCCTGATGTATCGATATCGGTAATTCT
TATTCCTTCGCTACCATCCATTGGAGGCCATCCTTCCTGACCATTTCCATCATTCCAGTCGAACTCACAC
ACAACACCATATGCATTTAAGTCGCTTGAAATTGCTATAAGCAGAGCATGTTGCGCCAGCATGATTAATA
CAGCATTTAATAAAGAGCCGTGTTTATTGAGTCGGTATTCAGAGTCTGACCAGAAATTATTAATCTGGTG
AAGTTTTTCCTCTGTCATTACGTCATGGTCGATTTCAATTTCTATTGATGCTTTCCAGTCGTAATCAATG
ATGTATTTTTTGATGTTTGACATCTGTTCATATCCTCACAGATAAAAAATCGCCCTCACATTGGAGGGCA
AAGAAGATTTCCAATAATCAGAACAAGTCGGCTCCTGTTTAGTTACGAGCGACATTGCTCCGTGTATTCA
CTCGTTGGAATGAATACACAGTGCTGTGTTTATTCTGTTGTTTATGCCAAAAATAAAGGCCACCATCAGG
CAGCCTTGTTGTAAATGTTGCAGGTATCAAGTAAGTAATTAGATGGAGCGCCATAAATTATGAATTCATC
GTTTGTCGGGTCCATCTCCATCTCTTGTCCTATTGCCATTCTTGCGTCAGTGTCGTCAGCGGCGAAGCAT
AAAACAGCCCACGCACCCATTGTTTTAAAAAGAACTGCAATTGGCTGTGGTTTTACTGAATTTGCGTTAG
CGCGAAAATCACAAATCGCACTTTCATGAAATTCCATATATCACCTCAAATAAGTGGTTTGCTGCCTAAT
TTCATTTTCTGGCGACCAACACAAGTCATCTTGCTGTCAGTTGTTTGGATTTACGGTAGCCTGCCGCGTA
AAGAGCTACATTTGGAAGACAAGTTGAGCCTTCATATTTTCTGGTCAACGTTGTCAGTGTTATTACTTCT
GCTCTCATTGCTGGTTTGCGTTTGCATTGTAAGACCACTCGTGATGGGGTTGGCCTGTGTAGTTTGTCGG
AGCTAATCGCCTCCTGACTTTGCAGGTTTGCGCGACGAGCTCTACGGCGAGAAGCTGCGGTGCCTTTAAA
TTCTGTTTTTCTGGACATAGATTCCTCCCGAATAAACTTTGGCGATGCAATCTCGAAGCTCCTCCTGAGA
CGGTTGCTTCGGCATTGCATCCCACAGCTTATGTGGTTGGGTGATCTGGCTTTTCAGCCACGTAGTCGAG
AGTCGACGTTGTTTAAAGAGCCTGCCAGTCTGTTCCATTTGGCTTCCAGCGTCCTGCTGATGGTTAAATA
GTACGATATGTACTTCACTTGGTCAATACAATTTGTTCTAAAACGGGGCGTTTTTTTACAACGCTTTGTA
TTTAATAGTATTGTTTTTTAGCGTGGGTGTATTGCCTCGGCGATGTAAGGAGAGATCAGAATTGCGTTGT
TTAGTGAGTTGTATCTATTTATTTTCCAATAAATACAATTGGTTATGTGTTTTTTTGGGCGAGAGGAAAA
GAAAACCCGGCATGGAGGCCGGGTTGATGATTAGCGGTGTGGCCTTGAGCGATAATGCTCACACACATGT
TCAAGATTTCCATGCCTTATCCGTTCATAGGCATTCACATGAACTTCTCGATCGAATTGGTCATTCAAAT
TGTATGTAGACATCTGTGTTTTCTCATATTGGCGGCAGCCCTACAACCGCTTGAAAAAATGTACCAGACG
CGCTAAGGTTACATCGCAAATATTGTGTACCTTAACAAGGGCTCCTTTTGGAGGCTCTGGTTAAACAGCA
TCAATGTCGGACTGGGGAGTTGGACATTGTGCTGAATGCTTTTGCATTATTGAGGCCGAACGTAAACCTT
CAGAATTGAAGAGATGCGTTCGGCTTCTTCGTTTGTGATATCGTTAGGAATGCCTTTAATCGTTACTGTA
ACCCCTGATTCAGGTCGAAGAACTACTGGAAGATCATAGGTATGAAGTGCATTAGCCTTGCCTTCGACTT
TTGTTGGTTCGCCAGTCAAATCTTTTTCCTCACTGGATTCTTTGTCAATCGGAGTGTATGGGATTTCTTC
ACCAGACTGGAAAGCTACAAACTTTTTGATTGCACTTTCCATGCGGCTTTTATATGCAGTAATGCTGCTG
TCGCTAGGCTTCGGCTCAGTTGCGTTGATGTATCGCTCGGCAAGCTCATTCACATCAAGCTGAGTAACAT
CACCCATTTCCTCTTCTTGGACTACCGTTAAGAGGCGAGCGGATGAGTTTTTTAAATTTCGAGCGGTGGC
CTCCTTCATTATGTTCAGCGACATAAGCTCTTCAAGGAAGTCCTTGAATGCCTGCACGCTAACGTTTGAC
TTTGCCATTTGCTCTCTCTCTAAGTTATTGACTCAGATCGAGTTTATCCAGGAATTGATTTGCATGCAAG
ACTCAAGTCTTGAGAATTTCCGTTCAAGATCCACTCTCAATAAAAAAGGCCGCACCTCTGCGACCTTTCA
TCTCCTAAATCTCTTTTCTCTTACCTAAAGAAACAGCAGGCTGGGTCAGCCCTAACAACTTCAAGTGCAT
CGGTCAGAGAAAGCTCCGTGCTATACAGGTGTTATTTCATATCTTTTTGCATCCAATAAATTTTCCATCT
GTCCAGAGAGCGGATGCACTTGATTCTTGTTGATGGCAGGACGTTTTTTCACCTGCCTCACCCTGCCATA
CAGGACGCTGCTCACCGATATCTATCGTCCGGTCATTGATGTTATAGACAATATCCAGATCATTACGGAT
ATACTCAGATGGCCTTATGCTTTCAATGAATAGATGAACTTCTTTTTGACCGCTTGATACTCATGGCCAT
TAAACTCCATCTATCCTCTTTACCCAAACGTCTCTTCAGGCCATTGGCCGGCGATAACTTTCCCCACAAC
GGAACAACTCTCATTGCATGGGATCATTGGATATTGCGGGTTTAGTGGTTGTAGAAACACCTGACCGCTA
TCCCTGATCAGTTTCTTGAAGGTAAATTCATCACCACCAAGTCTGGCTATGCAGAAATCGCCGGGCTCAA
CAGCTTGCTCAGGGTCAACCAGAATTAACATCCCGTCAGGAAAACTAGGTTTGGAACCTGTTGGTGCGGT
CATTGAGTTACCTTCAACCTCAAGCCAGAATGCAGAGTCACTGGCTTTTTTGGTTGTGCTTACCAATCTC
TCCGCATCACCTTTGGTAAAGGTTCTGAGTTCTGGAGAGAACATCCCAGCCTGAACATGAGAAAAAACAG
GGTACTCATATTGTTTTTTAACTGGGGCCGATGAGTATTCGCCAACAGGTGAAAATGTCCCGTCGTGGTT
GAATGATATGTTATCAATACCAAGGTATTTAAACACCACACCAATATCACTAAGAGATGGATGACGAGAT
CCGCGCAACCAGTGTCCAATTCCACCCTGCGTCATACCTAGCTCTTCGGCTAACTTCTCTTGAGTTATGC
CGAGCTCTTTCATTCTGGATCTAGCCAGTTCATACCATTTCATTTTCATGTCCTTATTATTACGCTCTGT
ACTGGAACCATCCATGCACAATGTGTATTTTTACTTGTATTTGAGAAGTACATATTGTATTTTTTTATTC
GTGGTTACTATGGAGGGCATATGAGCAACCTACGAAAATATCGAGAGTCACTGAATATCTCTCAAACAAC
ACTTGCTAAGGCAGTTGGATGCACACAGGGAGCTATCGGACATTGGGAATCTGGTCGTCGCTTCCCAGAC
CTTAAAACATGCCGTGCTCTTGTTGCGTGTCTAAACAAGTTAGGCGCAAAAGTAAGTCTTGATGACGTGT
TCCCGCCGGAGCACAAAGCCGCTTAATAAGCGGAGCCGCTCTTTGTAACAACGGACATTCGTCCTACGTC
GCTGAAAAGCGAGTCCCAAGATATCTGACCAACTAAGGCCATATGCGTTTCCACGCATACCTTTCAACTA
GCTATTCACTATTGGAAATCTTAAGAAATGGAACAAACAAGTTACAGCAAACTATCACAGCGAGAAATTG
ATCGCGCTGAAACTGATTTACTCATCAACCTGTCAACGCTTACCCAGCGCGGTCTGGCAAAGATGATTGG
CTGTCATGAATCGAAGATAAGCAGAACGGACTGGAGATTTATTGCTTCGGTCTTGTGTGCTTTCGGAATG
GCATCAGACATCAGTCCGATTAGCAGGGCTTTTAAGTATGCGCTTGATGAAATCACAAAGAAAAAATCCC
CGGCCGCCACCGAGGATTTTAAGCAAATTGATATGCAATTCTGAGGGAATTACTGGATCAATCCACAGGA
GTAATTATGACAAAACAACTCAGTCCTTACCAGGACAAAATTCACAAACACATACTACGTGATCGCTTCC
TGTCCAGCTTCAAGCAGCCTGGTCGATTCCGGGCTGAGTTGGAAAAAGTGAAGCTGATGCAGAAGGAGAA
AGGTCATGAGTAACATATCTAATCTAGCCGAAGCCAGAGAGGCAAGAAGGCTACAACAACCGCATCAAAG
CAGCGGTAAGGGGTATGCCTTGCTGCACCGTAAAATTATGGATGTGCCGTTTTACAAGGACGCAGAAGCT
GCGCATCTGTGGGTTCACTTAATCCTCAAAGCAAAGCATACGCCTGAGTATGTAATGACTGACGCAGGAG
AAATTCTGGTAGGCAGAGGGAAGCTACTTGGCGGTAGAAACTCTCTGGCGTTTGAAACAGGACTCAAACC
AGATCGCGTTCAGTACCTGCTTAGAAAGTTCAAAAAACTCGGCATGATTGACTGGGTTTCACACGGTAAA
TTCTCAGTTTTCTCGGTAGAGAAATATGACGATTATCAGTCAAATTTTGTACCAGCAGATTACCAGCAAA
TTACCACCTCAAAGCCAGCAATACCAATGCCTGCAAGCAATACTGTACCAGCAGATTACCAGCAAATTAC
CACAGATAAAGAATATAATAATATTATCTCTAATACTGACGTATTAGAGAGTGCCACAGCAGACAAAAAG
TCTGACAAGAAAAAACCTTCCGTTAGCTGTCAGGATGTTGTCGATGCTTACCACGAAATCCTTCCTGAAG
CGCCAAAAATCCGCGCACTGAATGACAAGCGTAAAAACCAGATCCGAACGTTCTGGCGCAAAGCCGGAGT
GATAACCCGCCAGCTTGACGGGCATGGGTTCACGATGCAGGACTGGAGAAATTATTTGAGCTACGTAGGC
GAAAATTGCCGATGGATGTTCGAAGAGCGCCCAAACCATCAGCGCGGAACCGTCTGGCACAAAAAGGGAT
TTGATTTCCTGCTTAACGATAATACCTACCTGAAAGTTCGTGAGGGTGAACACGATGACCGATAATTTTT
ATGCGCCGCCCCATAGCATCGAGGCAGAGCAGGCGGTGATTGGTGGATTGCTTCTGGATGATGACAGCAG
TGAGCGCGTCCAGAAAGTTCTGGCGATGCTGAAGCCTGATTCATTTTACAGCCGACCACACAAAATCATT
TTCGAAGAAATAACCAGAATGCACCGGGAGCAAAAGCCAGTAGATGGCCTGACGCTTTTCGATGAACTGG
AGCGTAAATCGTTAACGGCGTCTGTTGGCGGTTTTGCTTATATCGCTGAGATCGCAAAGAACACGCCAAG
CGCAGCAAACATCGTTGCCTATGCAATGCAGGTTCGTGAAACCGCAATGGAACGCTACGCCATCAACCGC
ATGACTGAAGCGACGGAATTGCTCTATTCCCGCAACGGAATGACTGCAACGCAGAAGTACGAAGCTATTC
AGGCGATTTTCACGCAACTGACAGACCATGCAAAAACCGGATCGCGTCGCGGCCTTCGCTCATTTGGCGA
GGTCATGGAAGACTGGGTTAGCGACCTTGAGAAGCGATTTGACCCGTCAGGCGAACAACGAGGAATGAGC
ACAGGGATCCCATCGCTGGACAGGATGCTGTCACCGAAAGGTCTGGTGAAAGGCTCTCTGTTTGTCATTG
GCGCTCGCCCTAAGATGGGGAAAACGACGCTATACAGCCAGATGGCAATCAATTGCGCAGTGCATGAGAA
AAAGCCCGCTCTGATGTTCAGCCTTGAAATGCCAGGTGATCAGATACTGGAAAAACTGGTAGGACAGAAG
TCAGGTGTTAACCCGAATATTTTTTACCTTCCGGCGACAAATGACGCCGATGACGGCTATCAGGGTGATT
ACGATGGTGACTTCAACAGGGCGATCGAAACAGCTAATCGCTTGAGTGAAATCGACCTGCTTTACATCGA
CGACACGCCGGGATTATCTCTGGCTCAAATCGTCAGCGAAAGCCGTCGAATCAAACGAGAAAAAGGATGC
GTTGGCATGATTCTGGTCGATTACCTGACACTAATGACCGCTGAGAAGGCCGATCGCAACGACCTTGCTT
ACGGCATGATCACCAAAGGACTGAAGAACCTTGCCAAAGAGCTTGATTGCGTTGTTGTGCTTCTGACGCA
GCTTAACCGCGCACTGGAAAGCCGAACCAATAAACGCCCACTACCAAGTGACTCACGAGATACAGGGCAG
ATTGAACAGGATTGCGATTATTGGGTGGGGATCCATCGTGAAGGTGCTTTTGATGACAGTGTTCCACCTG
GTGAAACCGAACTAATCCTTCGTCTCAATCGTCATGGCAATACCGGCACGGTGTATTGCATTCAGGCAAA
TGGCGCTATTTATGACACAGACCAACAGTCTGCTGAAATGCGCCGACGTGAACGCGAGGAACCGCAGTCC
AAGAAGAAAGGAGGATTCTGATGAATAAAAAACAATTAGCCATTCTCGAAAAGGCATGGGATGCACAAAT
ATCATACGCTTTGAAAGAACAGGCACTACCAATAATCCAGACCAAATCGAAAATAGCCAGGCAGTTATGC
GATGGCGGATTCCTGAACGAAATTGAGATTACGCGCCAGATGGTAACGTTTAAAGGGTATGAGATAAATC
ATCATGGTATAGCGGCGTATTGCTCCCATCTTCCTGATGACGTTGACATTGATGAAATGGAAAGGGAGAT
GAAGCAATGACCATCTACATCACTGAGCTAATAACAGGCCTGCTGGTAATCGCAGGCCTTTTTATTTGGG
GGAGAGGGAAGTGAACGATAGCTACCGACAGTTTGAAAACTGGTGGTCAAAAGACAAAAGCCAGTTCACG
GGAGACGATGAATTAAAAGAGTTTGCCTGGGTGATATGGCAGGCATCGCGCTCTGCTATTGAACTGGATA
TCGACTGGCCCGAATCGAATGACGACTTTTGGAAAGATGGTGAAGAAGGTGCTTATGCGATGGGTTATGA
GGATGGGCGTGACAAAACGGTAATTGCAGTAATGAAAGCCATCAGGGCCGCAGGAATCAAAGAAAAGAAT
TTCGATTAAGCAAATATCACTTCAATAAATCGCTTTTAAGGCATCACAATCGCTCTGTAGCGAGGTAAAC
GCGTGCAAGGCATGCCAATAAGCAGCGAGAATGAAAAATGCGTCAGAATGTGTTTGAGGAGGTTTTAAGA
AATGAGTACGATAGCTGAGCTTGTCAGGGCTAATTTTCGTGAAGAGTTGGTGCGTTGGTATCGGTATCGT
TCATCGTCCAGTTTGCCGCTTGATGAGTTGTATGAGCATTCACCTGCCGCACGACGCTATCCGCGTGACC
GTGTTCTTCGACGGTTGTTCAAACTCAACAATGAGTTTCAGCGCAACAGAATTATCCGGAGTCTGGATTT
AAAGTGAAGGAGTGAGCATGAGCGACCTATCATTAACCCAGCCAAAGCTAAAAGAATGTCCGTTTTGCGG
CGGTAATGCTCGTCTGTGGGTTGAGGCCGGAATAAATATTGATGTGTGGGGCTATGCAGAATGTGACCTC
TGTGAAGCCAGGGGGGCATGGGCACCATCAGTTGCTGCGGCGGCTGAAAAATGGAACCGGAGAGCAGGAG
ATGAAGCAAACCTTTCTGCTTCGCAACGAAGCAATCAGAAATAACGCCATAGACGCCATTCTCTCACTAC
CCATCGACGACAAGTCACCCCACGAAGTCCACGTTAAAGAACCCAAGCGCAGCAAAGCGCAGAATGACCG
TATGTGGCCGATGCTGAACGATGTTTCGCGTCAGGTGCTATGGCATGGTCAACGGCTGGCGCCGGAAGAC
TGGAAAGACCTGTTCACTGCCCTGTGGCTTAAGACCAAAAAACTGGAGCAACGAAGTGTGCCTGGTATCG
ACGGTGGCGTTGTCATGCTTGGCGTGCGTACCAGCAAAATGCGGAAGGCCAGCATGACTGAGCTTATCGA
AATCATGTTCTGGTTCGGCTCAGAGCGCAACGTGCGGTGGAGTGATGACTCCCGGCGAGAGTATGAATGG
TCACAACGAAAAGGTAGGGCTGCATGACTATCAAATCAAATACGCCAGCACACGACAAGGACTGCTGGCA
AACGCCGCTTTGGCTTTTTGATGCACTGGATATTGAGTTTGGATTCTGGCTGGATTCGGCAGCGAGCGAC
AAAAATGCTCTGTGCGCTCACTGGCTAACTGAGGCCGACGACGCGCTCAATTCTGAGTGGGTAAGCCACG
GTGCAATCTGGAATAACCCACCGTACAGCAATATCAGGCCGTGGGTGGAAAAAGCCGCTGAGCAGTGCAT
ACAACAGCGACAGACGGTAGTTATGCTTGTGCCAGAGGATATGTCAGTCGGATGGTTCAGCAAGGCTCTG
GAGAGTGTTGACGAAGTTCGCATCATCACTGATGGACGGATTAATTTTATCGAACCATCGACAGGGCTGG
AGAAGAAGGGAAACAGCAAAGGCTCCATGCTGCTGATTTGGCGACCGTTCATCAGTCCTCGACGAATGTT
TACTACTGTATCCAAAGCGGCATTGATGGCGATCGGGCAGGGCGTCAGGAGGGCGGCATGAGGCGACAGC
GACGAAGTATCACCGACATCATCTGCGAAAACTGCAAATACCTTCCAACGAAACGCTCCAGAAATAAACG
CAAGCCAATCCCAAAAGAATCTGACGTAAAAACCTTCAATTACACGGCTCACCTGTGGGATATCCGGTGG
CTAAGACATCGTGCGAGGAAAACAAGGTGATTGACGCGATGATTTATTCGGGGCTATATTCCTCACGCGC
CAGCAAAATCTGGCGTCGGGATTGGCGTCCTGGATAGAGACCGCGACAGATACACGCCGCGAGCGTGTTT
TTTATTGTCGTATGCACGCGCACATCTGAATTATGGTGGGCTGTGTGGGGGCGGAGAGATCCGCGCCGGT
CGGTTTCCCGGTTACGCCAACCCTGCACAGTTCACCACCAGACGATTGGCGTCGTCGGTGGTGAGTTATT
AAGAAACCACCAGAGGGCGTCATTATGACAACTCAAATTTCTGTTGAAACTCTCTCCCCGATCACCCATA
ACCAGATTCCTGTTATTACCACCGAACTTTTGGCGCAGCTTTACGGCACTGAGCCGGTGCGTATTCGCCA
GAATCATCATGAGAACAAAGTACGCTTCGTTGAAGGGAAACACTTTTTCAAAGTTGTTGGTAATGACCTT
AAAGAATTGCGGGTAGCTTTAAACTACTCACAAAATTTGCGGGTTACTTTAAGTAACTCACAAAATTTGC
AACCATCTTTAAGAGGGTTACAAATTTCCCCGAAAGCCCGCTCCCTCATACTCTGGACAGAACGAGGCGC
AGCCCGTCACGCAAAAATGCTCGAAACTGATCAGGCGTGGGATGTGTTCGAAAAACTGGAAGACTGCTAT
TTCAGCCAGTGCGAGAAAAATACTGGCAAACAAGAGAAGAAGCTCAACGGGCTTTCCGCAAAAGAAACAG
ACAGCCTTGTATGGCTGTGGGATTATGCCAACCGCTCACAGGCATTGTTCCGTGAGTTGTATCCCGCATT
AAAACTGATTCAGTCTGGCTATTCCGGCATATGCCACGACTACGGCTATGAGTTCTCGTATATCATCGGG
AGGGCGAGGGGCGTTTTAATTAATCACACGCGGGATATAGATATTTATGAGCCTGACGGGCCGACGAACC
TTCTGGCATGGGAAAGGCTTAAGAACAAAGAGTTGCCGCCTTCACTGCATCGCTACTGACAATTGACAAC
TTAACAAACCCAGCTTCGGCTGGGTTTTTTATTGCTGAATTTTCAATGTGAGAGGACATGACAATGAATG
AGCTGATAAATAGCAATGCCATCAAAATGACAAGCATTGAAATCGCTGAGTTGGTGGGAAGCCGTCATGA
CAAGGTGAAACAATCCATTGAACGACTGGCGGTTCGAGGTGTGATCCGAAATCCCCCAATGGTGGTTTTC
GAAAAAATCAATAACTTAGGATTACTTCGTGGCGTAGAGGCTTACGTTTTTGAGGGCGAACAAGGTAAGC
GCGACAGCATTATTGTCGTTGCCCAGTTGTCGCCGGAATTCACCGCTCGCCTTGTTGACCGCTGGCGAGA
ACTCGAAGGGGCAACCGCGAAAATACCACAAACCTTTTCTGAGGCATTGCGCCTTGCGGCCGACCTTGAA
GACCAGAAGGCTGAACTGGAGAAACAGCTTGCTCTCGCAGCACCTAAAGTTGAGTTTGCCGATCGCGTTG
GCGAGGCCAGCGGAATTTTGATTGGAAACTTTGCAAAGGTTGTTGGTATTGGTCCAAACAAACTGTTTGC
GTGGATGCGCGATCACAAAATCCTTATTGCTTCAGGCTCCCGGCGCAATGTGCCAATGCAGGAATATATG
GATCGTGGCTATTTCACAGTGAAAGAAACAGCGGTCAATACAAATCACGGAATACAGATATCGTTCACCA
CAAAAATCACCGGGCGTGGTCAACAGTGGCTGACCAGAAAGCTGCTCGATAACGGAATGCTGAAAGTAAC
AAGGGAGGCTGCTTAATGGCTAAACCAGCGCGAAGGAAATGCAAAATATGCAAGGAATGGTTTCACCCGG
CATTCTCAAATCAGTGGTGGTGCTGCCCGGAACACGGAACTCAATTAGCACTCGAACGACGAAGTAAAGA
ACGCGAAAAAGCGGAAAAAGCAGCAGAGAAGAAACGACGACGAGAGGAGCAGAAACAGAAAGATAAACTG
AAGATTCGAAAACTCGCCTTAAAGCCCCGCAGTTACTGGATTAAACAAGCCCAACAAGCCGTAAACGCCT
TCATCAGAGAAAGAGACCGCGACTTACCATGTATCTCGTGCGGAACGCTCACGTCTGCTCAGTGGGATGC
CGGACATTACCGGACAACTGCTGCGGCACCTCAACTCCGATTTGATGAACGCAATATTCACAAGCAATGC
GTGGTGTGCAACCAGCACAAAAGCGGAAATCTCGTTCCGTATCGCGTCGAACTGATTAACCGCATCGGGC
AGGAAGCAGTAGACGAAATCGAATCGAACCATAACCGCCATCGCTGGACTGTCGAAGAATGCAGGGCGAT
CAAGGCGAAGTATCAGCAGAAACTTAAAGACCTGCGAAACAGCAGAAGTGAGGCCGCATGACGTTCACAG
TAAAAACCATTCCAGACATGCTCGTTGAGGCATATGAAAATCAGACCGAGGTAGCCAGAATACTGAACTG
TAGTCGCAACACGGTCAGAAAATACACTGGCGATAAAGAAGGGAAAAGACACGCTATCGTCAACGGTGTT
CTTATGGTTCACCGCGGATGGGGTAAAGATACTGATGCGTGATATCCGGCAGGTTCTTGAGCGCTGGGGG
GCATGGGCGGCAAATAACTATGAGGATGTTACATGGTCGCCCATTGCTGCCGGATTTAAGGGACTGATCC
CCGAAAAAGTAAAATCACGTCCACAGTGCTGTGACGATGATGCGATGGTGATATGCGGGTGCATAGCCCG
CCTTTACCGGAACAATCGCGATCTGCATGACTTGCTGGTTGATTATTACGTGTTGGGGGAGACGTTCATG
GCGTTGGCACGGAAACATGGGTGCTCTGACACCTGTATAGGTAAACGCCTTCACAAAGCGGAGGGGATTG
TTGAAGGCATGCTGATGATGCTGGGAGTGAGGCTTGAGATGGATCGGTATGTTGAGCGTGAATTGCCGGG
AGGGAGAACCTCTGTATTTTATCAGCGAAAAAATAGTTTACGATCGTAAAAATCTGCATATCATGATAAG
AGTGGTTACATTGCCACGCAGTCGAACCCGCCGATGCGCGGGTTTTTTTGTACCCCGAATCCTGTGAGCT
ATACGGAAAGTACACAGAAAGGAAGGTGCGACCGTAATTAATAACAAAATCTTAAAAATCGCATATAGCA
CTATTAGTTTTCTAAATATTGTATATTTTAAGTATTGCAGGATAACCCTGTAACGAAGTTTGCGTAACAG
CATTTTGCTCTACGAGTTTGCCAGCCTCCCCCAGTGGCTGGCTTTTTTATGTCCGTAGCGTCAAAGCAGC
AATGGCGCTAGGGCGTCGTGCAATTGGCGTTGAGCTGGAGAGCGGGCGTTTTGAGCAGACGGTCAGGGAA
GTTCAGAATGTAGTCAGTCAGAACGGATGATATTGCAGGATTAGTTACGTACCGTTATTATCCTGCGCCC
GGCCCTTTAGCTCAGTGGTGAGAGCGAGCGACTCATAATCGCCAGGTCGCTGGTTCAAATCCAGCAAGGG
CCACCATATCACATACCGCCATTAGCTCATCGGGACAGAGCGCCAGCCTTCGAAGCTGGCTGCGCGGGGT
TCGAGTCCTCGATGGCGGTCCATTATCTGCATTATGCGTTGTTAGCTCAGCCGGACAGAGCAATTGCCTT
CTGAGCAATCGGTCACTGGTTCGAATCCAGTACAACGCGCCATATTTATTTACCAGGCTCGCTTTTGCGG
GCCTTTTTTATATCTGCGCCGGGTCTGGTGCTGATTACTTCAGCCAAAAGGAACACCTGTATATGAAGTG
TATATTATTTAAATGGGTACTGTGCCTGTTACTGGGTTTTTCTTCGGTATCCTATTCCCGGGAGTTTACG
ATAGACTTTTCGACCCAACAAAGTTATGTCTCTTCGTTAAATAGTATACGGACAGAGATATCGACCCCTC
TTGAACATATATCTCAGGGGACCACATCGGTGTCTGTTATTAACCACACCCCACCGGGCAGTTATTTTGC
TGTGGATATACGAGGGCTTGATGTCTATCAGGCGCGTTTTGACCATCTTCGTCTGATTATTGAGCAAAAT
AATTTATATGTGGCCGGGTTCGTTAATACGGCAACAAATACTTTCTACCGTTTTTCAGATTTTACACATA
TATCAGTGCCCGGTGTGACAACGGTTTCCATGACAACGGACAGCAGTTATACCACTCTGCAACGTGTCGC
AGCGCTGGAACGTTCCGGAATGCAAATCAGTCGTCACTCACTGGTTTCATCATATCTGGCGTTAATGGAG
TTCAGTGGTAATACAATGACCAGAGATGCATCCAGAGCAGTTCTGCGTTTTGTCACTGTCACAGCAGAAG
CCTTACGCTTCAGGCAGATACAGAGAGAATTTCGTCAGGCACTGTCTGAAACTGCTCCTGTGTATACGAT
GACGCCGGGAGACGTGGACCTCACTCTGAACTGGGGGCGAATCAGCAATGTGCTTCCGGAGTATCGGGGA
GAGGATGGTGTCAGAGTGGGGAGAATATCCTTTAATAATATATCAGCGATACTGGGGACTGTGGCCGTTA
TACTGAATTGCCATCATCAGGGGGCGCGTTCTGTTCGCGCCGTGAATGAAGAGAGTCAACCAGAATGTCA
GATAACTGGCGACAGGCCTGTTATAAAAATAAACAATACATTATGGGAAAGTAATACAGCTGCAGCGTTT
CTGAACAGAAAGTCACAGTTTTTATATACAACGGGTAAATAAAGGAGTTAAGCATGAAGAAGATGTTTAT
GGCGGTTTTATTTGCATTAGCTTCTGTTAATGCAATGGCGGCGGATTGTGCTAAAGGTAAAATTGAGTTT
TCCAAGTATAATGAGGATGACACATTTACAGTGAAGGTTGACGGGAAAGAATACTGGACCAGTCGCTGGA
ATCTGCAACCGTTACTGCAAAGTGCTCAGTTGACAGGAATGACTGTCACAATCAAATCCAGTACCTGTGA
ATCAGGCTCCGGATTTGCTGAAGTGCAGTTTAATAATGACTGAGGCATAACCTGATTCGTGGTATGTGGG
TAACAAGTGTAATCTGTGTCACAATTCAGTCAGTTGACAGTTGCCTGTCAGACTGAGCATTTGTTAAAAA
AATTTCGCATGGTGAATCCCCCTGTGTGGAGGGGCGACTGGTGAAAAATCCTTGCTTGTGATTCATTATC
GACACGGGTTCGGTGGTACCAGGCCGAACTCACCGGGAGGCACCCGGCACCATGCAGTATACAGAGATTA
GGCATATACCAAGGCCTCTCATAGCAGGGGCCTTTTTACATGTAAAAAAGCCCGAGTGGGTTCGGGCAAT
TGCATGAGATACTCGTTTTAATAATCGAAATCATTTTAACCAGGATTCATAAGGCTGCGCAACTGCGCGG
CCTTTTTCGTATTTCGGGCTGTAGTCTTCCTTCTGCCATTGTCCTGTAACTTCCGGACTTCAGCCCGCTC
CTTATTTTACTCACAATATTATCCCGGCCGGGAGGATTCATGGCATTTAAACACTATGATGTTGTCAGGG
CGGCGTCGCCGTCAGACCTTGCGAAACGAATAACTCAAAAACTGAAGGAAGGGTGGCAGCCTTATGGTAG
TGCGCTGATTTCGACAGCTGGTTATGGTGCGGAGTTCATCCAGCCAGTTGTGAGTGAGGGGAGCATCTCA
TCACCAGAGGAGCCAGGCAACCGTCCGACGACCTCAGCGCCTTCTGTTGCGCCAGAATATTACTATGTGA
TCGCGCTTGCTGGTCAGTCCAATGGTATGTCATACGGTGAGGGACTGCCATTGCCGGATACATTCGACAG
CCCTGATCCACGTATTAAACAGTTAGCGCGTCGCAGTACGGTGACACCGGGCGGTGCAGTATGCAAATAT
AACGACATCATTCCGGCGGACCATTGTCTGCATGATGTGCAGGACATGAGCCGTCTTAACCATCCGAAAG
CGGACCTGTCAAAGGGGCAGTACGGAACCGTGGGGCAGGGGCTGCATATCGCCAAAAAACTGCTGCCGTT
TATACCGGCGAATGCGGGCATTCTGCTGGTTCCGTGCTGTCGTGGTGGTTCAGCGTTCACCACCGGAGCC
GATGGCACATACAGTGACGCGAGTGGTGCCTCGGAGAATTCAACCCGCTGGGGTGTGGACAAGCCGCTGT
ATAAGGACCTTATCGGTCGAACAAAAGCAGCACTGAAGAAGAATCCGAAAAATGTGCTGTTTGCCGTGGT
GTGGATGCAGGGGGAATTTGATTTTGGCGGTACGCCGGTAAATCACGCCGCACAGTTTGGTGCGCTGGTT
GATAAATTCCGTGCAGACCTGGCGGATATGGCAGGCCAGTGCGTCGGTGGCTCTGCTGGCGGTGTTCCCT
GGATATGCGGGGACACGACGTATTTCTGGAAGCAGAAGAACGAATCCACGTACCAGACGGTGTATGGCAG
CTATAAAAACAAAACGGAAAAGAATATCCATTTCGTACCGTTCATGACGGATGAGAACGGGGTGAATGTG
CCGACGAACAAACCGGAAGAAGACCCGGACATTCCGGGTATCGGATATTACGGTTCGAAATGGCGTGACA
GCTCAGCCACCTGGACGTCACAGGACAGGGCGAGCCATTTCAGTTCATGGGCTCGCCGCGGGATTATTTC
CGACCGTCTGGCAACGGCGATTTTGCGCCATGCGGGAAGAGTGGCGCTAAACGCGGGGGCATCATCGACA
GTATCAGAGGTGCGCCCGTCATCGCCTTCCGGTGCAGAAGCCACAGGCGTCACAACACTGCTCTCTTACC
TTGCCAGCGAGTCAGAGGGAAGCCTGAAAGTACAGGGATGGTCAGCCAGTGGCGGCAGGGCAGAAGTGGT
CAGCGATGCGGAGGGAACCGGAGGTAAGGCAGTGAAGCTGACCAAGGAAGCCGGTAAAAGCAGCTGGGTG
CTGGAGTACGCCGCGGGCAACGGTGCGGCTCTGTTACAGAAAGGGGGGCAGATTCGCTGCCGCTTTAAGG
[truncated: 8,814 more rows]
