# Supplementary material for: Comparative Genome Analysis Reveals Accumulation of Single-Nucleotide Repeats in Pathogenic Escherichia Lineages
Source: Curr Issues Mol Biol. 2022 Jan 20;44(2):498–504. doi: 10.3390/cimb44020034 (PMC8928963; doi:10.3390/cimb44020034)
Supplement: Supplementary file 1 [file cimb-44-00034-s001.zip › Table S5.xlsx]

## Sheet: Sheet1
Table S5. Assembly sequences used in this study.
Accession no.	Bioproject	Biosample	Species taxid	Organism name	Infraspecific name	Assembly level
GCF_000005845.2	PRJNA57779	SAMN02604091	511145	Escherichia coli str. K-12 substr. MG1655	K-12 substr. MG1655	Complete Genome
GCF_000007445.1	PRJNA224116	SAMN02604094	199310	Escherichia coli CFT073	CFT073	Complete Genome
GCF_000008865.2	PRJNA57781	SAMN01911278	386585	Escherichia coli O157:H7 str. Sakai	Sakai substr. RIMD 0509952	Complete Genome
GCF_000009565.1	PRJNA224116	SAMEA2272558	469008	Escherichia coli BL21(DE3)	BL21(DE3)	Complete Genome
GCF_000010245.2	PRJNA224116	SAMD00061081	316407	Escherichia coli str. K-12 substr. W3110	K-12 substr. W3110	Complete Genome
GCF_000010385.1	PRJNA224116	SAMD00061087	409438	Escherichia coli SE11	SE11	Complete Genome
GCF_000010485.1	PRJNA224116	SAMD00060923	431946	Escherichia coli SE15	SE15	Complete Genome
GCF_000010745.1	PRJNA224116	SAMD00060956	585395	Escherichia coli O103:H2 str. 12009	12009	Complete Genome
GCF_000010765.1	PRJNA224116	SAMD00060957	585396	Escherichia coli O111:H- str. 11128	11128	Complete Genome
GCF_000013265.1	PRJNA224116	SAMN00000110	364106	Escherichia coli UTI89	UTI89	Complete Genome
GCF_000013305.1	PRJNA224116	SAMN02604181	362663	Escherichia coli 536	536	Complete Genome
GCF_000014845.1	PRJNA224116	SAMN02603424	405955	Escherichia coli APEC O1	APEC O1	Complete Genome
GCF_000017745.1	PRJNA224116	SAMN02604038	331111	Escherichia coli O139:H28 str. E24377A	E24377A	Complete Genome
GCF_000017765.1	PRJNA224116	SAMN02604037	331112	Escherichia coli HS	HS	Complete Genome
GCF_000017985.1	PRJNA224116	SAMN02603421	413997	Escherichia coli B str. REL606	REL606	Complete Genome
GCF_000019385.1	PRJNA224116	SAMN02598405	481805	Escherichia coli ATCC 8739	ATCC 8739	Complete Genome
GCF_000019425.1	PRJNA224116	SAMN02604262	316385	Escherichia coli str. K-12 substr. DH10B	K-12 substr. DH10B	Complete Genome
GCF_000019645.1	PRJNA224116	SAMN02604066	439855	Escherichia coli SMS-3-5	SMS-3-5	Complete Genome
GCF_000021125.1	PRJNA224116	SAMN02603441	444450	Escherichia coli O157:H7 str. EC4115	EC4115	Complete Genome
GCF_000022225.1	PRJNA224116	SAMN02604255	544404	Escherichia coli O157:H7 str. TW14359	TW14359	Complete Genome
GCF_000022345.1	PRJNA224116	SAMN02603900	595496	Escherichia coli BW2952	K-12 substr. BW2952	Complete Genome
GCF_000022665.1	PRJNA224116	SAMN02603478	469008	Escherichia coli BL21(DE3)	BL21(DE3)	Complete Genome
GCF_000023365.1	PRJNA224116	SAMN02598470	536056	Escherichia coli DH1	DH1	Complete Genome
GCF_000023665.1	PRJNA224116	SAMN00002656	866768	Escherichia coli 'BL21-Gold(DE3)pLysS AG'	BL21-Gold(DE3)pLysS AG	Complete Genome
GCF_000025165.1	PRJNA224116	SAMN02603636	701177	Escherichia coli O55:H7 str. CB9615	CB9615	Complete Genome
GCF_000025745.1	PRJNA224116	SAMN02603334	714962	Escherichia coli IHE3034	IHE3034	Complete Genome
GCF_000026245.1	PRJNA224116	SAMEA3138229	585055	Escherichia coli 55989	55989	Complete Genome
GCF_000026265.1	PRJNA224116	SAMEA3138230	585034	Escherichia coli IAI1	IAI1	Complete Genome
GCF_000026285.1	PRJNA224116	SAMEA3138231	585035	Escherichia coli S88	S88	Complete Genome
GCF_000026345.1	PRJNA224116	SAMEA3138234	585057	Escherichia coli IAI39	IAI39	Complete Genome
GCF_000026545.1	PRJNA224116	SAMEA1705959	574521	Escherichia coli O127:H6 str. E2348/69	E2348/69	Complete Genome
GCF_000027125.1	PRJNA224116	SAMEA2272277	216592	Escherichia coli 042	42	Complete Genome
GCF_000091005.1	PRJNA224116	SAMD00060955	573235	Escherichia coli O26:H11 str. 11368	11368	Complete Genome
GCF_000147855.2	PRJNA224116	SAMN00016779	595495	Escherichia coli KO11FL	KO11	Complete Genome
GCF_000148365.1	PRJNA224116	SAMN02603258	655817	Escherichia coli ABU 83972	ABU 83972	Complete Genome
GCF_000148605.1	PRJNA224116	SAMN00017915	869729	Escherichia coli UM146	UM146	Complete Genome
GCF_000167875.2	PRJNA224116	SAMN02435896	340186	Escherichia coli E110019	E110019	Complete Genome
GCF_000183345.1	PRJNA224116	SAMN02603727	685038	Escherichia coli O83:H1 str. NRG 857C	NRG 857C	Complete Genome
GCF_000184185.1	PRJNA224116	SAMN02602978	566546	Escherichia coli W	W	Complete Genome
GCF_000210475.1	PRJNA224116	SAMEA2272237	316401	Escherichia coli ETEC H10407	ETEC H10407	Complete Genome
GCF_000212715.2	PRJNA224116	SAMN02604221	696406	Escherichia coli UMNK88	UMNK88	Complete Genome
GCF_000219515.2	PRJNA224116	SAMN02469619	1001989	Escherichia coli PCN033	PCN033	Complete Genome
GCF_000227625.1	PRJNA224116	SAMN02603406	1072459	Escherichia coli O7:K1 str. CE10	CE10	Complete Genome
GCF_000233875.1	PRJNA224116	SAMN02603902	885276	Escherichia coli str. 'clone D i2'	clone D i2	Complete Genome
GCF_000233895.1	PRJNA224116	SAMN02603903	885275	Escherichia coli str. 'clone D i14'	clone D i14	Complete Genome
GCF_000245515.1	PRJNA224116	SAMN02604278	1048689	Escherichia coli O55:H7 str. RM12579	RM12579	Complete Genome
GCF_000257275.1	PRJNA224116	SAMN02603904	910348	Escherichia coli P12b	P12b	Complete Genome
GCF_000258025.1	PRJNA224116	SAMN02604168	595495	Escherichia coli KO11FL	KO11FL	Complete Genome
GCF_000258145.1	PRJNA224116	SAMN02604169	566546	Escherichia coli W	W	Complete Genome
GCF_000262125.1	PRJNA224116	SAMN02603645	741093	Escherichia coli Xuzhou21	Xuzhou21	Complete Genome
GCF_000270105.1	PRJNA224116	SAMD00060976	536056	Escherichia coli DH1	DH1	Complete Genome
GCF_000284495.1	PRJNA224116	SAMEA3138414	591946	Escherichia coli LF82	LF82	Complete Genome
GCF_000285655.3	PRJNA224116	SAMEA2272019	941322	Escherichia coli O25b:H4-ST131	EC958	Complete Genome
GCF_000299255.1	PRJNA224116	SAMN01831189	1134782	Escherichia coli O104:H4 str. 2009EL-2050	2009EL-2050	Complete Genome
GCF_000299455.1	PRJNA224116	SAMN01831188	1133852	Escherichia coli O104:H4 str. 2011C-3493	2011C-3493	Complete Genome
GCF_000299475.1	PRJNA224116	SAMN01831190	1133853	Escherichia coli O104:H4 str. 2009EL-2071	2009EL-2071	Complete Genome
GCF_000332755.1	PRJNA224116	SAMN02603426	1274814	Escherichia coli APEC O78	APEC O78	Complete Genome
GCF_000464955.2	PRJNA224116	SAMN02147037	1335303	Escherichia coli O104:H21 str. CFSAN002236	ATCC BAA-178	Complete Genome
GCF_000468515.1	PRJNA224116	SAMN02604176	1335916	Escherichia coli LY180	LY180	Complete Genome
GCF_000493755.1	PRJNA224116	SAMN02603887	1355100	Escherichia coli JJ1886	JJ1886	Complete Genome
GCF_000499485.1	PRJNA224116	SAMEA3138816	1403831	Escherichia coli str. K-12 substr. MC4100	K-12 substr. MC4100	Complete Genome
GCF_000520035.1	PRJNA224116	SAMN02641383	1248902	Escherichia coli O145:H28 str. RM13514	RM13514	Complete Genome
GCF_000520055.1	PRJNA224116	SAMN02641384	1248915	Escherichia coli O145:H28 str. RM13516	RM13516	Complete Genome
GCF_000597845.1	PRJNA224116	SAMN02647163	562	Escherichia coli	ST540	Complete Genome
GCF_000599625.1	PRJNA224116	SAMN02666434	562	Escherichia coli	ST540	Complete Genome
GCF_000599645.1	PRJNA224116	SAMN02666695	562	Escherichia coli	ST540	Complete Genome
GCF_000599665.1	PRJNA224116	SAMN02666696	562	Escherichia coli	ST2747	Complete Genome
GCF_000599685.1	PRJNA224116	SAMN02666697	562	Escherichia coli	ST2747	Complete Genome
GCF_000599705.1	PRJNA224116	SAMN02666698	562	Escherichia coli	ST2747	Complete Genome
GCF_000662395.1	PRJNA224116	SAMN03081526	1248903	Escherichia coli O145:H28 str. RM12761	RM12761	Complete Genome
GCF_000671295.1	PRJNA224116	SAMN03081527	1248823	Escherichia coli O145:H28 str. RM12581	RM12581	Complete Genome
GCF_000714595.1	PRJNA224116	SAMN02794012	316435	Escherichia coli Nissle 1917	Nissle 1917	Complete Genome
GCF_000725265.1	PRJNA224116	SAMN02918008	340184	Escherichia coli B7A	B7A	Complete Genome
GCF_000725305.1	PRJNA224116	SAMN02440167	1435461	Escherichia coli KLY	KLY	Complete Genome
GCF_000730345.1	PRJNA224116	SAMN02872945	1328859	Escherichia coli O157:H7 str. SS17	SS17	Complete Genome
GCF_000732965.1	PRJNA224116	SAMN02905113	155864	Escherichia coli O157:H7 str. EDL933	EDL933	Complete Genome
GCF_000743255.1	PRJNA224116	SAMN02929659	1322345	Escherichia coli ATCC 25922	ATCC 25922	Complete Genome
GCF_000750555.1	PRJNA224116	SAMN03013572	679895	Escherichia coli BW25113	K-12 substr. BW25113	Complete Genome
GCF_000784925.1	PRJNA224116	SAMN02709589	562	Escherichia coli	ECONIH1	Complete Genome
GCF_000800215.1	PRJNA224116	SAMN03093203	1245474	Escherichia coli ER2796	K-12 ER2796	Complete Genome
GCF_000800765.1	PRJNA224116	SAMN03107000	83333	Escherichia coli K-12	K-12 ER3413	Complete Genome
GCF_000800845.1	PRJNA224116	SAMN03339595	439184	Escherichia coli RS218	RS218	Complete Genome
GCF_000801165.1	PRJNA224116	SAMN03264844	562	Escherichia coli	RM9387	Complete Genome
GCF_000801185.2	PRJNA224116	SAMN03262652	562	Escherichia coli	94-3024	Complete Genome
GCF_000801205.1	PRJNA224116	SAMN02743420	511145	Escherichia coli str. K-12 substr. MG1655	K-12 substr. MG1655	Complete Genome
GCF_000803705.1	PRJNA224116	SAMN03265100	1330457	Escherichia coli O157:H7 str. SS52	SS52	Complete Genome
GCF_000813165.1	PRJNA224116	SAMN03274236	1329907	Escherichia coli APEC IMT5155	APEC IMT5155	Complete Genome
GCF_000814145.2	PRJNA224116	SAMN03263950	562	Escherichia coli	6409	Complete Genome
GCF_000819645.1	PRJNA224116	SAMN03083542	562	Escherichia coli	789	Complete Genome
GCF_000827105.1	PRJNA224116	SAMN02673556	930406	Escherichia coli O157:H16	Santai	Complete Genome
GCF_000829985.1	PRJNA224116	SAMN02949643	745156	Escherichia coli 1303	1303	Complete Genome
GCF_000830035.1	PRJNA224116	SAMN03292179	562	Escherichia coli	C41(DE3)	Complete Genome
GCF_000831565.1	PRJNA224116	SAMN02949644	758831	Escherichia coli ECC-1470	ECC-1470	Complete Genome
GCF_000833145.1	PRJNA224116	SAMN03301757	562	Escherichia coli	BL21 (TaKaRa)	Complete Genome
GCF_000833635.2	PRJNA224116	SAMN03294311	562	Escherichia coli	USML2	Complete Genome
GCF_000931565.1	PRJNA224116	SAMN03287565	562	Escherichia coli	MNCRE44	Complete Genome
GCF_000952955.1	PRJNA224116	SAMEA2547783	562	Escherichia coli	K-12 substr. RV308	Complete Genome
GCF_000953515.1	PRJNA224116	SAMEA2547782	562	Escherichia coli	K-12 substr. HMS174	Complete Genome
GCF_000967155.2	PRJNA224116	SAMEA3865278	562	Escherichia coli	HUSEC2011	Complete Genome
GCF_000968515.1	PRJNA224116	SAMN03371467	941323	Escherichia coli VR50	VR50	Complete Genome
GCF_000971615.1	PRJNA224116	SAMN03390066	562	Escherichia coli	CI5	Complete Genome
GCF_000974405.1	PRJNA224116	SAMN03277616	83333	Escherichia coli K-12	K-12 MG1655	Complete Genome
GCF_000974465.1	PRJNA224116	SAMN03277613	83333	Escherichia coli K-12	K-12 MG1655	Complete Genome
GCF_000974505.1	PRJNA224116	SAMN03277619	83333	Escherichia coli K-12	K-12 MG1655	Complete Genome
GCF_000974535.1	PRJNA224116	SAMN03277614	83333	Escherichia coli K-12	K-12 MG1655	Complete Genome
GCF_000974575.1	PRJNA224116	SAMN03277617	83333	Escherichia coli K-12	K-12 MG1655	Complete Genome
GCF_000974825.1	PRJNA224116	SAMN03277615	83333	Escherichia coli K-12	K-12 MG1655	Complete Genome
GCF_000974865.1	PRJNA224116	SAMN03277618	83333	Escherichia coli K-12	K-12 MG1655	Complete Genome
GCF_000974885.1	PRJNA224116	SAMN03277612	83333	Escherichia coli K-12	K-12 MG1655	Complete Genome
GCF_000981485.1	PRJNA224116	SAMEA3143339	83333	Escherichia coli K-12	K-12 substr. AG100	Complete Genome
GCF_000986765.1	PRJNA224116	SAMN03856947	1048254	Escherichia coli O104:H4 str. C227-11	C227-11	Complete Genome
GCF_000987875.1	PRJNA224116	SAMN03576594	562	Escherichia coli	SEC470	Complete Genome
GCF_000988355.1	PRJNA224116	SAMN03276545	562	Escherichia coli	SQ37	Complete Genome
GCF_000988385.1	PRJNA224116	SAMN03276546	562	Escherichia coli	SQ88	Complete Genome
GCF_000988465.1	PRJNA224116	SAMN03276542	562	Escherichia coli	SQ2203	Complete Genome
GCF_001007915.1	PRJNA224116	SAMN03612246	562	Escherichia coli	CFSAN029787	Complete Genome
GCF_001020945.2	PRJNA224116	SAMN02404591	83333	Escherichia coli K-12	K-12 substr. GM4792	Complete Genome
GCF_001021005.2	PRJNA224116	SAMN02404590	83333	Escherichia coli K-12	K-12 substr. GM4792	Complete Genome
GCF_001021595.1	PRJNA224116	SAMN02666437	562	Escherichia coli	O18	Complete Genome
GCF_001021615.1	PRJNA224116	SAMN03761813	1401688	Escherichia coli APEC O18	APEC O18	Complete Genome
GCF_001021635.2	PRJNA224116	SAMN03761814	1954351	Escherichia coli APEC O2-211	APEC O2-211	Complete Genome
GCF_001029125.1	PRJNA224116	SAMN03765122	1358422	Escherichia coli PCN061	PCN061	Complete Genome
GCF_001039415.1	PRJNA224116	SAMN03761398	562	Escherichia coli	C43(DE3)	Complete Genome
GCF_001043215.1	PRJNA224116	SAMN03659038	562	Escherichia coli	NCM3722	Complete Genome
GCF_001051135.1	PRJNA224116	SAMN03852615	1311757	Escherichia coli ACN001	ACN001	Complete Genome
GCF_001183645.1	PRJNA224116	SAMN03861948	562	Escherichia coli	DH1Ec095	Complete Genome
GCF_001183665.1	PRJNA224116	SAMN03863255	562	Escherichia coli	DH1Ec104	Complete Genome
GCF_001183685.1	PRJNA224116	SAMN03863378	562	Escherichia coli	DH1Ec169	Complete Genome
GCF_001276585.2	PRJNA224116	SAMN03384316	562	Escherichia coli	RR1	Complete Genome
GCF_001280325.1	PRJNA224116	SAMN04026225	562	Escherichia coli	SF-088	Complete Genome
GCF_001280345.1	PRJNA224116	SAMN04026228	562	Escherichia coli	SF-468	Complete Genome
GCF_001280385.1	PRJNA224116	SAMN04026226	562	Escherichia coli	SF-166	Complete Genome
GCF_001280405.1	PRJNA224116	SAMN04026227	562	Escherichia coli	SF-173	Complete Genome
GCF_001307215.1	PRJNA224116	SAMN04103124	83334	Escherichia coli O157:H7	WS4202	Complete Genome
GCF_001308065.1	PRJNA224116	SAMN03203487	511145	Escherichia coli str. K-12 substr. MG1655	K-12 substr. MG1655	Complete Genome
GCF_001308125.1	PRJNA224116	SAMN03203488	562	Escherichia coli	K-12 substr. MG1655_TMP32XR1	Complete Genome
GCF_001308165.1	PRJNA224116	SAMN03203489	562	Escherichia coli	K-12 substr. MG1655_TMP32XR2	Complete Genome
GCF_001420935.1	PRJNA224116	SAMN03952643	562	Escherichia coli	2012C-4227	Complete Genome
GCF_001420955.1	PRJNA224116	SAMN02991226	562	Escherichia coli	2009C-3133	Complete Genome
GCF_001442495.1	PRJNA224116	SAMN04227566	562	Escherichia coli	YD786	Complete Genome
GCF_001455385.1	PRJNA224116	SAMN04288058	562	Escherichia coli	CQSW20	Complete Genome
GCF_001469815.1	PRJNA224116	SAMN04159541	562	Escherichia coli	uk_P46212	Complete Genome
GCF_001485455.1	PRJNA224116	SAMN02800875	562	Escherichia coli	ST648	Complete Genome
GCF_001513615.1	PRJNA224116	SAMN04381845	562	Escherichia coli	CD306	Complete Genome
GCF_001513635.1	PRJNA224116	SAMN04381854	562	Escherichia coli	JJ2434	Complete Genome
GCF_001515725.1	PRJNA224116	SAMN04385793	562	Escherichia coli	ACN002	Complete Genome
GCF_001542675.2	PRJNA224116	SAMN04395032	562	Escherichia coli	MRE600	Complete Genome
GCF_001544635.1	PRJNA224116	SAMN04403366	511145	Escherichia coli str. K-12 substr. MG1655	K-12 substr. MG1655	Complete Genome
GCF_001558995.2	PRJNA224116	SAMN04191546	83334	Escherichia coli O157:H7	JEONG-1266	Complete Genome
GCF_001559615.2	PRJNA224116	SAMN04435507	37762	Escherichia coli B	C2566	Complete Genome
GCF_001559635.1	PRJNA224116	SAMN04435508	37762	Escherichia coli B	C3029	Complete Genome
GCF_001559655.1	PRJNA224116	SAMN04435497	83333	Escherichia coli K-12	K-12 DHB4	Complete Genome
GCF_001559675.1	PRJNA224116	SAMN04435499	83333	Escherichia coli K-12	K-12 C3026	Complete Genome
GCF_001566335.1	PRJNA224116	SAMN04393382	511145	Escherichia coli str. K-12 substr. MG1655	JW5437-1 substr. MG1655	Complete Genome
GCF_001566615.1	PRJNA224116	SAMN04381849	562	Escherichia coli	SaT040	Complete Genome
GCF_001566635.1	PRJNA224116	SAMN04381851	562	Escherichia coli	G749	Complete Genome
GCF_001566655.1	PRJNA224116	SAMN04381852	562	Escherichia coli	MVAST0167	Complete Genome
GCF_001566675.1	PRJNA224116	SAMN04381846	562	Escherichia coli	ZH193	Complete Genome
GCF_001577325.1	PRJNA224116	SAMN04381853	562	Escherichia coli	ZH063	Complete Genome
GCF_001593565.1	PRJNA224116	SAMN04481707	1355101	Escherichia coli JJ1887	JJ1887	Complete Genome
GCF_001610755.1	PRJNA224116	SAMN02580208	1441627	Escherichia coli str. Sanji	Sanji	Complete Genome
GCF_001612475.1	PRJNA224116	SAMN04202540	562	Escherichia coli	28RC1	Complete Genome
GCF_001612495.1	PRJNA224116	SAMN04202539	562	Escherichia coli	SRCC 1675	Complete Genome
GCF_001617565.1	PRJNA224116	SAMN04621897	562	Escherichia coli	Ecol_732	Complete Genome
GCF_001618325.1	PRJNA224116	SAMN04590096	562	Escherichia coli	Ecol_743	Complete Genome
GCF_001618345.2	PRJNA224116	SAMN04590095	562	Escherichia coli	Ecol_745	Complete Genome
GCF_001618365.1	PRJNA224116	SAMN04590097	562	Escherichia coli	Ecol_448	Complete Genome
GCF_001644725.1	PRJNA224116	SAMN04851092	562	Escherichia coli	2011C-3911	Complete Genome
GCF_001644745.1	PRJNA224116	SAMN04851091	562	Escherichia coli	2013C-4465	Complete Genome
GCF_001645235.2	PRJNA224116	SAMN04851094	562	Escherichia coli	2011C-4315	Complete Genome
GCF_001650275.1	PRJNA224116	SAMN05007044	1045010	Escherichia coli O157	180-PT54	Complete Genome
GCF_001650295.1	PRJNA224116	SAMN05007045	1045010	Escherichia coli O157	644-PT8	Complete Genome
GCF_001651925.2	PRJNA224116	SAMN04191551	83334	Escherichia coli O157:H7	FRIK2069	Complete Genome
GCF_001651945.2	PRJNA224116	SAMN04191553	83334	Escherichia coli O157:H7	FRIK2533	Complete Genome
GCF_001651965.2	PRJNA224116	SAMN04531998	83334	Escherichia coli O157:H7	FRIK2455	Complete Genome
GCF_001660565.1	PRJNA224116	SAMN05190012	562	Escherichia coli	S51	Complete Genome
GCF_001660585.1	PRJNA224116	SAMN05194365	562	Escherichia coli	NGF1	Complete Genome
GCF_001663075.1	PRJNA224116	SAMN05210771	562	Escherichia coli	ER1821R	Complete Genome
GCF_001663475.1	PRJNA224116	SAMN03455974	562	Escherichia coli	Eco889	Complete Genome
GCF_001675145.1	PRJNA224116	SAMN03455931	562	Escherichia coli	ECONIH2	Complete Genome
GCF_001677475.1	PRJNA224116	SAMN02808332	562	Escherichia coli	06-00048	Complete Genome
GCF_001677495.1	PRJNA224116	SAMN02808333	562	Escherichia coli	09-00049	Complete Genome
GCF_001677515.1	PRJNA224116	SAMN02688213	562	Escherichia coli	08-00022	Complete Genome
GCF_001678925.1	PRJNA224116	SAMN03768474	562	Escherichia coli	H1827/12	Complete Genome
GCF_001678965.1	PRJNA224116	SAMN02688215	562	Escherichia coli	GB089	Complete Genome
GCF_001679985.1	PRJNA224116	SAMN05177221	562	Escherichia coli	210205630	Complete Genome
GCF_001682305.2	PRJNA224116	SAMN05252777	562	Escherichia coli	EC590	Complete Genome
GCF_001683435.1	PRJNA224116	SAMN05291917	562	Escherichia coli	K-15KW01	Complete Genome
GCF_001693315.1	PRJNA224116	SAMN05392487	562	Escherichia coli	UPEC 26-1	Complete Genome
GCF_001693635.1	PRJNA224116	SAMN05407982	562	Escherichia coli	O177:H21	Complete Genome
GCF_001695515.1	PRJNA224116	SAMN04510563	83334	Escherichia coli O157:H7	FRIK944	Complete Genome
GCF_001721125.1	PRJNA224116	SAMN04026657	562	Escherichia coli	FORC_028	Complete Genome
GCF_001721225.1	PRJNA224116	SAMN02688212	562	Escherichia coli	CFSAN004176	Complete Genome
GCF_001721525.1	PRJNA224116	SAMN04939501	562	Escherichia coli	MS6198	Complete Genome
GCF_001723505.1	PRJNA224116	SAMN05725120	562	Escherichia coli	K-12 NEB 5-alpha	Complete Genome
GCF_001735705.1	PRJNA224116	SAMN05346848	562	Escherichia coli	210205630	Complete Genome
GCF_001750845.1	PRJNA224116	SAMN04209666	562	Escherichia coli	FORC_031	Complete Genome
GCF_001753445.1	PRJNA224116	SAMN04447635	83334	Escherichia coli O157:H7	1130	Complete Genome
GCF_001753465.1	PRJNA224116	SAMN04447629	83334	Escherichia coli O157:H7	2149	Complete Genome
GCF_001753485.1	PRJNA224116	SAMN04447624	83334	Escherichia coli O157:H7	8368	Complete Genome
GCF_001753505.1	PRJNA224116	SAMN04447630	83334	Escherichia coli O157:H7	2159	Complete Genome
GCF_001753525.1	PRJNA224116	SAMN04447632	83334	Escherichia coli O157:H7	9234	Complete Genome
GCF_001753545.1	PRJNA224116	SAMN04447623	83334	Escherichia coli O157:H7	3384	Complete Genome
GCF_001753565.1	PRJNA224116	SAMN04447636	83334	Escherichia coli O157:H7	4276	Complete Genome
GCF_001806265.1	PRJNA224116	SAMN05729957	562	Escherichia coli	NADC 5570/86-24/6565	Complete Genome
GCF_001806285.1	PRJNA224116	SAMN05729956	562	Escherichia coli	NADC 5570/86-24/6564	Complete Genome
GCF_001860505.1	PRJNA224116	SAMN04299569	562	Escherichia coli	Y5	Complete Genome
GCF_001865295.1	PRJNA224116	SAMN04040761	562	Escherichia coli	PA20	Complete Genome
GCF_001874485.1	PRJNA224116	SAMN04605558	941280	Escherichia coli O25b:H4	O25b:H4	Complete Genome
GCF_001886535.1	PRJNA224116	SAMN06029893	562	Escherichia coli	MRSN352231	Complete Genome
GCF_001886555.1	PRJNA224116	SAMN06029895	562	Escherichia coli	MRSN346638	Complete Genome
GCF_001886575.1	PRJNA224116	SAMN06029896	562	Escherichia coli	MRSN346355	Complete Genome
GCF_001886755.1	PRJNA224116	SAMN06029894	562	Escherichia coli	MRSN346595	Complete Genome
GCF_001886895.1	PRJNA224116	SAMN04243989	562	Escherichia coli	FORC_029	Complete Genome
GCF_001886935.1	PRJNA224116	SAMN04965119	562	Escherichia coli	FORC_041	Complete Genome
GCF_001888075.1	PRJNA224116	SAMN05945146	562	Escherichia coli	FMU073332	Complete Genome
GCF_001890205.1	PRJNA224116	SAMN05544764	562	Escherichia coli	155	Complete Genome
GCF_001890225.1	PRJNA224116	SAMN05544766	562	Escherichia coli	272	Complete Genome
GCF_001890245.1	PRJNA224116	SAMN05544767	562	Escherichia coli	472	Complete Genome
GCF_001890265.1	PRJNA224116	SAMN05544765	562	Escherichia coli	350	Complete Genome
GCF_001890285.1	PRJNA224116	SAMN05544760	562	Escherichia coli	9000	Complete Genome
GCF_001890305.1	PRJNA224116	SAMN05544762	562	Escherichia coli	7784	Complete Genome
GCF_001890325.1	PRJNA224116	SAMN05544768	562	Escherichia coli	319	Complete Genome
GCF_001890345.1	PRJNA224116	SAMN05544761	562	Escherichia coli	10671	Complete Genome
GCF_001890365.1	PRJNA224116	SAMN06067968	562	Escherichia coli	MRSN346647	Complete Genome
GCF_001900295.1	PRJNA224116	SAMN03252409	562	Escherichia coli	C1	Complete Genome
GCF_001900315.1	PRJNA224116	SAMN03252412	562	Escherichia coli	C4	Complete Genome
GCF_001900335.1	PRJNA224116	SAMN03252417	562	Escherichia coli	C10	Complete Genome
GCF_001900355.1	PRJNA224116	SAMN03252418	562	Escherichia coli	C11	Complete Genome
GCF_001900375.1	PRJNA224116	SAMN03252425	562	Escherichia coli	D7	Complete Genome
GCF_001900395.1	PRJNA224116	SAMN03252426	562	Escherichia coli	D8	Complete Genome
GCF_001900415.1	PRJNA224116	SAMN03252432	562	Escherichia coli	H5	Complete Genome
GCF_001900435.1	PRJNA224116	SAMN03252433	562	Escherichia coli	H6	Complete Genome
GCF_001900455.1	PRJNA224116	SAMN03252434	562	Escherichia coli	H7	Complete Genome
GCF_001900475.1	PRJNA224116	SAMN03252436	562	Escherichia coli	H10	Complete Genome
GCF_001900495.1	PRJNA224116	SAMN03252410	562	Escherichia coli	C2	Complete Genome
GCF_001900515.1	PRJNA224116	SAMN03252411	562	Escherichia coli	C3	Complete Genome
GCF_001900535.1	PRJNA224116	SAMN03252413	562	Escherichia coli	C5	Complete Genome
GCF_001900555.1	PRJNA224116	SAMN03252415	562	Escherichia coli	C8	Complete Genome
GCF_001900575.1	PRJNA224116	SAMN03252416	562	Escherichia coli	C9	Complete Genome
GCF_001900595.1	PRJNA224116	SAMN03252419	562	Escherichia coli	D1	Complete Genome
GCF_001900615.1	PRJNA224116	SAMN03252420	562	Escherichia coli	D2	Complete Genome
GCF_001900635.1	PRJNA224116	SAMN03252421	562	Escherichia coli	D3	Complete Genome
GCF_001900655.1	PRJNA224116	SAMN03252422	562	Escherichia coli	D4	Complete Genome
GCF_001900675.1	PRJNA224116	SAMN03252423	562	Escherichia coli	D5	Complete Genome
GCF_001900695.1	PRJNA224116	SAMN03252424	562	Escherichia coli	D6	Complete Genome
GCF_001900715.1	PRJNA224116	SAMN03252427	562	Escherichia coli	D9	Complete Genome
GCF_001900735.1	PRJNA224116	SAMN03252428	562	Escherichia coli	D10	Complete Genome
GCF_001900775.1	PRJNA224116	SAMN03252429	562	Escherichia coli	H1	Complete Genome
GCF_001900795.1	PRJNA224116	SAMN03252430	562	Escherichia coli	H2	Complete Genome
GCF_001900815.1	PRJNA224116	SAMN03252431	562	Escherichia coli	H3	Complete Genome
GCF_001900835.1	PRJNA224116	SAMN03252435	562	Escherichia coli	H8	Complete Genome
GCF_001900885.1	PRJNA224116	SAMN03252437	562	Escherichia coli	H14	Complete Genome
GCF_001900905.1	PRJNA224116	SAMN03252450	562	Escherichia coli	S3	Complete Genome
GCF_001900925.1	PRJNA224116	SAMN03252452	562	Escherichia coli	S21	Complete Genome
GCF_001900945.1	PRJNA224116	SAMN03252454	562	Escherichia coli	S40	Complete Genome
GCF_001900965.1	PRJNA224116	SAMN03252455	562	Escherichia coli	S42	Complete Genome
GCF_001900985.1	PRJNA224116	SAMN03252456	562	Escherichia coli	S43	Complete Genome
GCF_001901005.1	PRJNA224116	SAMN03252438	562	Escherichia coli	H15	Complete Genome
GCF_001901025.1	PRJNA224116	SAMN03252439	562	Escherichia coli	M1	Complete Genome
GCF_001901045.1	PRJNA224116	SAMN03252440	562	Escherichia coli	M3	Complete Genome
GCF_001901065.1	PRJNA224116	SAMN03252441	562	Escherichia coli	M6	Complete Genome
GCF_001901085.1	PRJNA224116	SAMN03252442	562	Escherichia coli	M8	Complete Genome
GCF_001901105.1	PRJNA224116	SAMN03252443	562	Escherichia coli	M9	Complete Genome
GCF_001901125.1	PRJNA224116	SAMN03252444	562	Escherichia coli	M10	Complete Genome
GCF_001901145.1	PRJNA224116	SAMN03252445	562	Escherichia coli	M11	Complete Genome
GCF_001901165.1	PRJNA224116	SAMN03252446	562	Escherichia coli	M15	Complete Genome
GCF_001901185.1	PRJNA224116	SAMN03252447	562	Escherichia coli	M18	Complete Genome
GCF_001901215.1	PRJNA224116	SAMN03252448	562	Escherichia coli	M19	Complete Genome
GCF_001901315.1	PRJNA224116	SAMN03252449	562	Escherichia coli	S1	Complete Genome
GCF_001901365.1	PRJNA224116	SAMN03252453	562	Escherichia coli	S30	Complete Genome
GCF_001901405.1	PRJNA224116	SAMN03252457	562	Escherichia coli	S50	Complete Genome
GCF_001901425.1	PRJNA224116	SAMN03252414	562	Escherichia coli	C7	Complete Genome
GCF_001901445.1	PRJNA224116	SAMN03252458	562	Escherichia coli	S56	Complete Genome
GCF_001901465.1	PRJNA224116	SAMN03252451	562	Escherichia coli	S10	Complete Genome
GCF_001932515.1	PRJNA224116	SAMN06115651	562	Escherichia coli	tolC-	Complete Genome
GCF_001936315.1	PRJNA224116	SAMN05853574	562	Escherichia coli	SLK172	Complete Genome
GCF_001969285.3	PRJNA224116	SAMN06197014	562	Escherichia coli	WCHEC050613	Complete Genome
GCF_001999185.1	PRJNA224116	SAMN06227049	562	Escherichia coli	MGY	Complete Genome
GCF_002007705.1	PRJNA224116	SAMN06314933	562	Escherichia coli	NCTC86	Complete Genome
GCF_002009315.1	PRJNA224116	SAMN06344815	562	Escherichia coli	MDR_56	Complete Genome
GCF_002011945.1	PRJNA224116	SAMN05511177	562	Escherichia coli	Ecol_224	Complete Genome
GCF_002011965.1	PRJNA224116	SAMN05511184	562	Escherichia coli	Ecol_276	Complete Genome
GCF_002011985.1	PRJNA224116	SAMN05511183	562	Escherichia coli	Ecol_316	Complete Genome
GCF_002012005.1	PRJNA224116	SAMN05511179	562	Escherichia coli	Ecol_517	Complete Genome
GCF_002012025.1	PRJNA224116	SAMN05511186	562	Escherichia coli	Ecol_542	Complete Genome
GCF_002012045.1	PRJNA224116	SAMN05511169	562	Escherichia coli	Ecol_545	Complete Genome
GCF_002012065.1	PRJNA224116	SAMN05511161	562	Escherichia coli	Ecol_656	Complete Genome
GCF_002012085.1	PRJNA224116	SAMN05511152	562	Escherichia coli	Ecol_AZ146	Complete Genome
GCF_002012105.1	PRJNA224116	SAMN05511182	562	Escherichia coli	Ecol_AZ147	Complete Genome
GCF_002012125.1	PRJNA224116	SAMN05511168	562	Escherichia coli	Ecol_AZ155	Complete Genome
GCF_002012145.1	PRJNA224116	SAMN05511159	562	Escherichia coli	Ecol_AZ159	Complete Genome
GCF_002012165.1	PRJNA224116	SAMN05511185	562	Escherichia coli	Ecol_AZ162	Complete Genome
GCF_002012185.1	PRJNA224116	SAMN05511153	562	Escherichia coli	Ecol_422	Complete Genome
GCF_002012205.1	PRJNA224116	SAMN05511148	562	Escherichia coli	Ecol_867	Complete Genome
GCF_002012225.1	PRJNA224116	SAMN05511150	562	Escherichia coli	Ecol_881	Complete Genome
GCF_002012245.1	PRJNA224116	SAMN05511160	562	Escherichia coli	Ecol_AZ153	Complete Genome
GCF_002012265.1	PRJNA224116	SAMN05511166	562	Escherichia coli	Ecol_AZ161	Complete Genome
GCF_002012305.1	PRJNA224116	SAMN05511157	562	Escherichia coli	Ecol_244	Complete Genome
GCF_002024865.1	PRJNA224116	SAMN06314223	569579	Escherichia coli NU14	NU14	Complete Genome
GCF_002055605.1	PRJNA224116	SAMN06554468	562	Escherichia coli	13E0725	Complete Genome
GCF_002055635.1	PRJNA224116	SAMN04014959	562	Escherichia coli	AR_0118	Complete Genome
GCF_002056065.1	PRJNA224116	SAMN04014902	562	Escherichia coli	AR_0061	Complete Genome
GCF_002056145.1	PRJNA224116	SAMN04014910	562	Escherichia coli	AR_0069	Complete Genome
GCF_002056635.1	PRJNA224116	SAMN04014945	562	Escherichia coli	AR_0104	Complete Genome
GCF_002057245.1	PRJNA224116	SAMN06563569	562	Escherichia coli	13E0780	Complete Genome
GCF_002057355.1	PRJNA224116	SAMN06563579	562	Escherichia coli	13E0767	Complete Genome
GCF_002058765.1	PRJNA224116	SAMN06434185	562	Escherichia coli	DSM 103246	Complete Genome
GCF_002077195.1	PRJNA224116	SAMN05762409	562	Escherichia coli	FAM21845	Complete Genome
GCF_002079225.1	PRJNA224116	SAMN06645125	498388	Escherichia coli C	C	Complete Genome
GCF_002090355.1	PRJNA224116	SAMN06619924	562	Escherichia coli	BLR(DE3)	Complete Genome
GCF_002105735.1	PRJNA224116	SAMN05414625	562	Escherichia coli	CFSAN051542	Complete Genome
GCF_002116715.2	PRJNA224116	SAMN06819205	562	Escherichia coli	HB-Coli0	Complete Genome
GCF_002118095.1	PRJNA224116	SAMN04396805	562	Escherichia coli	HST04	Complete Genome
GCF_002142675.1	PRJNA224116	SAMN06924979	562	Escherichia coli	Z1002	Complete Genome
GCF_002142695.1	PRJNA224116	SAMN06828737	562	Escherichia coli	5CRE51	Complete Genome
GCF_002142715.1	PRJNA224116	SAMN06925129	562	Escherichia coli	strain Z247	Complete Genome
GCF_002156825.1	PRJNA224116	SAMN06924970	562	Escherichia coli	95JB1	Complete Genome
GCF_002156845.1	PRJNA224116	SAMN06947002	562	Escherichia coli	95NR1	Complete Genome
GCF_002157245.1	PRJNA224116	SAMN06808253	562	Escherichia coli	81009	Complete Genome
GCF_002163655.1	PRJNA224116	SAMN06093946	562	Escherichia coli	KSC9	Complete Genome
GCF_002163695.1	PRJNA224116	SAMN06165994	562	Escherichia coli	KSC64	Complete Genome
GCF_002163935.1	PRJNA224116	SAMN06166007	562	Escherichia coli	KSC1031	Complete Genome
GCF_002163955.1	PRJNA224116	SAMN06165999	562	Escherichia coli	KSC207	Complete Genome
GCF_002164595.2	PRJNA224116	SAMN06231252	562	Escherichia coli	WCHEC000837	Complete Genome
GCF_002164635.4	PRJNA224116	SAMN06909153	562	Escherichia coli	WCHEC96200	Complete Genome
GCF_002164645.3	PRJNA224116	SAMN06909152	562	Escherichia coli	WCHEC4533	Complete Genome
GCF_002164865.2	PRJNA224116	SAMN06909180	562	Escherichia coli	WCHEC020032	Complete Genome
GCF_002164975.2	PRJNA224116	SAMN06909178	562	Escherichia coli	SCEC020026	Complete Genome
GCF_002165095.2	PRJNA224116	SAMN06909177	562	Escherichia coli	SCEC020022	Complete Genome
GCF_002165115.2	PRJNA224116	SAMN06909172	562	Escherichia coli	SCEC020001	Complete Genome
GCF_002180055.1	PRJNA224116	SAMN04014990	562	Escherichia coli	AR_0149	Complete Genome
GCF_002180095.1	PRJNA224116	SAMN04014960	562	Escherichia coli	AR_0119	Complete Genome
GCF_002180135.1	PRJNA224116	SAMN04015003	562	Escherichia coli	AR_0162	Complete Genome
GCF_002180195.1	PRJNA224116	SAMN04014899	562	Escherichia coli	AR_0058	Complete Genome
GCF_002180215.1	PRJNA224116	SAMN04014992	562	Escherichia coli	AR_0151	Complete Genome
GCF_002180275.1	PRJNA224116	SAMN04014969	562	Escherichia coli	AR_0128	Complete Genome
GCF_002192275.1	PRJNA224116	SAMN04014955	562	Escherichia coli	AR_0114	Complete Genome
GCF_002192295.1	PRJNA224116	SAMN04014991	562	Escherichia coli	AR_0150	Complete Genome
GCF_002193095.1	PRJNA224116	SAMN07162922	562	Escherichia coli	H105	Complete Genome
GCF_002196475.1	PRJNA224116	SAMN07192703	562	Escherichia coli	EC974	Complete Genome
GCF_002196495.1	PRJNA224116	SAMN07192704	562	Escherichia coli	EC1515	Complete Genome
GCF_002201835.1	PRJNA224116	SAMN04014978	562	Escherichia coli	AR_0137	Complete Genome
GCF_002202175.1	PRJNA224116	SAMN04014896	562	Escherichia coli	AR_0055	Complete Genome
GCF_002208865.2	PRJNA224116	SAMN06173306	1045010	Escherichia coli O157	FDAARGOS_293	Complete Genome
GCF_002209105.2	PRJNA224116	SAMN06173361	1038927	Escherichia coli O104:H4	FDAARGOS_348	Complete Genome
GCF_002211725.1	PRJNA224116	SAMN07260764	562	Escherichia coli	ABWA45	Complete Genome
GCF_002214205.1	PRJNA224116	SAMN07273977	562	Escherichia coli	M160133	Complete Genome
GCF_002214745.2	PRJNA224116	SAMN05520965	562	Escherichia coli	FORC_043	Complete Genome
GCF_002215095.1	PRJNA224116	SAMN03783363	562	Escherichia coli	PSUO2	Complete Genome
GCF_002220215.1	PRJNA224116	SAMN07251590	562	Escherichia coli	E62	Complete Genome
GCF_002220265.1	PRJNA224116	SAMN05417814	562	Escherichia coli	FORC_044	Complete Genome
GCF_002237305.1	PRJNA224116	SAMN03963238	562	Escherichia coli	PAR	Complete Genome
GCF_002237325.1	PRJNA224116	SAMN03963241	562	Escherichia coli	WAT	Complete Genome
GCF_002246595.2	PRJNA224116	SAMN07450616	562	Escherichia coli	ECCTRSRTH03	Complete Genome
GCF_002249955.1	PRJNA224116	SAMN03256350	562	Escherichia coli	CDC#03-98	Complete Genome
GCF_002269325.1	PRJNA224116	SAMN02951658	1446746	Escherichia coli O6:H16	2011EL-1370-2	Complete Genome
GCF_002278115.2	PRJNA224116	SAMN06928086	562	Escherichia coli	CFSAN061770	Complete Genome
GCF_002285755.1	PRJNA224116	SAMN06920354	562	Escherichia coli	PA45B	Complete Genome
GCF_002302315.1	PRJNA224116	SAMN07503734	562	Escherichia coli	ETEC-2265	Complete Genome
GCF_002302335.1	PRJNA224116	SAMN07503733	562	Escherichia coli	ETEC-2264	Complete Genome
GCF_002310555.1	PRJNA224116	SAMN07618127	562	Escherichia coli	1943	Complete Genome
GCF_002310575.1	PRJNA224116	SAMN07618128	562	Escherichia coli	317	Complete Genome
GCF_002310595.1	PRJNA224116	SAMN07618126	562	Escherichia coli	144	Complete Genome
GCF_002310615.1	PRJNA224116	SAMN07618121	562	Escherichia coli	1190	Complete Genome
GCF_002310635.1	PRJNA224116	SAMN07618120	562	Escherichia coli	1105	Complete Genome
GCF_002310655.1	PRJNA224116	SAMN07618129	562	Escherichia coli	746	Complete Genome
GCF_002310675.1	PRJNA224116	SAMN07618123	562	Escherichia coli	127	Complete Genome
GCF_002310695.1	PRJNA224116	SAMN07618125	562	Escherichia coli	1428	Complete Genome
GCF_002310715.1	PRJNA224116	SAMN07618122	562	Escherichia coli	1223	Complete Genome
GCF_002310735.1	PRJNA224116	SAMN07618124	562	Escherichia coli	1283	Complete Genome
GCF_002357875.1	PRJNA224116	SAMD00056132	562	Escherichia coli	MRY15-131	Complete Genome
GCF_002357895.1	PRJNA224116	SAMD00056131	562	Escherichia coli	MRY15-117	Complete Genome
GCF_002357915.1	PRJNA224116	SAMD00056130	562	Escherichia coli	20Ec-P-124	Complete Genome
GCF_002393365.1	PRJNA224116	SAMN07312447	562	Escherichia coli	FDAARGOS_403	Complete Genome
GCF_002393465.1	PRJNA224116	SAMN07312445	562	Escherichia coli	FDAARGOS_401	Complete Genome
GCF_002494365.2	PRJNA224116	SAMN07692432	562	Escherichia coli	KL53	Complete Genome
GCF_002587005.1	PRJNA224116	SAMN07765387	562	Escherichia coli	IMT16316	Complete Genome
GCF_002589795.1	PRJNA224116	SAMN07312477	562	Escherichia coli	FDAARGOS_433	Complete Genome
GCF_002591135.1	PRJNA224116	SAMN07312492	562	Escherichia coli	FDAARGOS_448	Complete Genome
GCF_002716885.1	PRJNA224116	SAMN04623227	1055545	Escherichia coli O91 str. RM7190	RM7190	Complete Genome
GCF_002741175.1	PRJNA224116	SAMN04578538	1446707	Escherichia coli O25:NM	2014EL-1343-2	Complete Genome
GCF_002741195.1	PRJNA224116	SAMN07638908	1446746	Escherichia coli O6:H16	2014EL-1346-6	Complete Genome
GCF_002741215.1	PRJNA224116	SAMN07656203	2048777	Escherichia coli O15:H11	90-9272	Complete Genome
GCF_002741255.1	PRJNA224116	SAMN07656205	2048775	Escherichia coli O114:H49	90-9280	Complete Genome
GCF_002741275.1	PRJNA224116	SAMN07656207	2048779	Escherichia coli O182:H21	D181	Complete Genome
GCF_002741295.1	PRJNA224116	SAMN01916957	562	Escherichia coli	ATCC 43886	Complete Genome
GCF_002741315.1	PRJNA224116	SAMN07656209	2048780	Escherichia coli O25:H16	F5505-C1	Complete Genome
GCF_002741335.1	PRJNA224116	SAMN04621488	562	Escherichia coli	F5656C1	Complete Genome
GCF_002741355.1	PRJNA224116	SAMN01917241	562	Escherichia coli	ATCC 43896	Complete Genome
GCF_002741435.1	PRJNA224116	SAMN07509121	1446701	Escherichia coli O169:H41	2014EL-1345-2	Complete Genome
GCF_002741455.1	PRJNA224116	SAMN07656206	2048776	Escherichia coli O128:H27	90-9281	Complete Genome
GCF_002741475.1	PRJNA224116	SAMN07731009	2048781	Escherichia coli O27:H7	B4103-1	Complete Genome
GCF_002741495.1	PRJNA224116	SAMN07656210	1446701	Escherichia coli O169:H41	F6326-C1	Complete Genome
GCF_002741515.1	PRJNA224116	SAMN07656211	1446746	Escherichia coli O6:H16	F6699	Complete Genome
GCF_002741535.1	PRJNA224116	SAMN07172369	562	Escherichia coli	F8111-1SC3	Complete Genome
GCF_002741555.1	PRJNA224116	SAMN04625459	562	Escherichia coli	F9792	Complete Genome
GCF_002741575.1	PRJNA224116	SAMN07656212	1446746	Escherichia coli O6:H16	M9682-C1	Complete Genome
GCF_002741595.1	PRJNA224116	SAMN04851096	2048778	Escherichia coli O178:H19	2012C-4431	Complete Genome
GCF_002761835.1	PRJNA224116	SAMN07819355	562	Escherichia coli	WG5	Complete Genome
GCF_002763515.2	PRJNA224116	SAMN07210972	562	Escherichia coli	BH100 substr. MG2014	Complete Genome
GCF_002763995.1	PRJNA224116	SAMN07980821	562	Escherichia coli		Complete Genome
GCF_002764015.1	PRJNA224116	SAMN07980822	562	Escherichia coli	LS4	Complete Genome
GCF_002786655.1	PRJNA224116	SAMN07944239	562	Escherichia coli	CREC-532	Complete Genome
GCF_002787215.1	PRJNA224116	SAMN04014847	562	Escherichia coli	AR_0006	Complete Genome
GCF_002787315.1	PRJNA224116	SAMN04014855	562	Escherichia coli	AR_0014	Complete Genome
GCF_002787545.1	PRJNA224116	SAMN07944243	562	Escherichia coli	CREC-629	Complete Genome
GCF_002787645.1	PRJNA224116	SAMN07944240	562	Escherichia coli	CREC-544	Complete Genome
GCF_002787935.1	PRJNA224116	SAMN07944241	562	Escherichia coli	CREC-591	Complete Genome
GCF_002788115.1	PRJNA224116	SAMN04014856	562	Escherichia coli	AR_0015	Complete Genome
GCF_002788295.1	PRJNA224116	SAMN04014852	562	Escherichia coli	AR_0011	Complete Genome
GCF_002796445.1	PRJNA224116	SAMN04014860	562	Escherichia coli	AR_0019	Complete Genome
GCF_002796585.1	PRJNA224116	SAMN04014858	562	Escherichia coli	AR_0017	Complete Genome
GCF_002803805.1	PRJNA224116	SAMN08040561	562	Escherichia coli	CV839-15	Complete Genome
GCF_002803905.1	PRJNA224116	SAMN07983336	562	Escherichia coli	AMA1167	Complete Genome
GCF_002811555.3	PRJNA224116	SAMN07510673	562	Escherichia coli	WCHEC025943	Complete Genome
GCF_002812545.1	PRJNA224116	SAMN08104834	562	Escherichia coli	SC516	Complete Genome
GCF_002843685.1	PRJNA224116	SAMN08158212	511145	Escherichia coli str. K-12 substr. MG1655	K-12 substr. MG1655	Complete Genome
GCF_002844165.1	PRJNA224116	SAMN07339706	991915	Escherichia coli O121:H19	16-9255	Complete Genome
GCF_002844685.1	PRJNA224116	SAMN08148591	562	Escherichia coli	ExPEC XM	Complete Genome
GCF_002846135.1	PRJNA224116	SAMN08148171	562	Escherichia coli	MS8345	Complete Genome
GCF_002848225.1	PRJNA224116	SAMN07197446	562	Escherichia coli	DH5alpha	Complete Genome
GCF_002850675.4	PRJNA224116	SAMN07768275	562	Escherichia coli	SCEC020023	Complete Genome
GCF_002853655.1	PRJNA224116	SAMN07807400	562	Escherichia coli	14EC017	Complete Genome
GCF_002853715.1	PRJNA224116	SAMN07807401	562	Escherichia coli	14EC020	Complete Genome
GCF_002853805.1	PRJNA224116	SAMN07807402	562	Escherichia coli	14EC029	Complete Genome
GCF_002853965.1	PRJNA224116	SAMN07807404	562	Escherichia coli	14EC047	Complete Genome
GCF_002854065.1	PRJNA224116	SAMN07807403	562	Escherichia coli	14EC033	Complete Genome
GCF_002855325.1	PRJNA224116	SAMN07792806	562	Escherichia coli	14EC001	Complete Genome
GCF_002855415.1	PRJNA224116	SAMN07807399	562	Escherichia coli	14EC007	Complete Genome
GCF_002859105.1	PRJNA224116	SAMN08117235	562	Escherichia coli	BH100 substr. MG2017	Complete Genome
GCF_002860085.1	PRJNA224116	SAMN06198938	562	Escherichia coli	CRE1540	Complete Genome
GCF_002860105.1	PRJNA224116	SAMN06198937	562	Escherichia coli	CRE1493	Complete Genome
GCF_002863665.1	PRJNA224116	SAMN07767837	562	Escherichia coli	SMN197SH3	Complete Genome
GCF_002863685.1	PRJNA224116	SAMN07806871	562	Escherichia coli	SMN152SH1	Complete Genome
GCF_002863845.1	PRJNA224116	SAMN07302603	562	Escherichia coli	STEC299	Complete Genome
GCF_002863885.1	PRJNA224116	SAMN07716515	562	Escherichia coli	SMN013SH2	Complete Genome
GCF_002870165.1	PRJNA224116	SAMN08281024	562	Escherichia coli	SCEC020007	Complete Genome
GCF_002879975.1	PRJNA224116	SAMN08326676	562	Escherichia coli	ML35	Complete Genome
GCF_002887715.1	PRJNA224116	SAMN08118424	562	Escherichia coli	BH100L substr. MG2017	Complete Genome
GCF_002893905.2	PRJNA224116	SAMN08093640	562	Escherichia coli	CV839-06	Complete Genome
GCF_002899475.1	PRJNA224116	SAMN08362704	562	Escherichia coli	DH5alpha	Complete Genome
GCF_002899495.1	PRJNA224116	SAMN08367764	562	Escherichia coli	CAR	Complete Genome
GCF_002899515.1	PRJNA224116	SAMN08367768	562	Escherichia coli	LIM	Complete Genome
GCF_002899535.1	PRJNA224116	SAMN08367769	562	Escherichia coli	CIT	Complete Genome
GCF_002900305.1	PRJNA224116	SAMN08272629	562	Escherichia coli	BH100N substr. MG2017	Complete Genome
GCF_002903105.1	PRJNA224116	SAMN06040386	562	Escherichia coli	ECONIH5	Complete Genome
GCF_002903125.1	PRJNA224116	SAMN05341196	562	Escherichia coli	ECONIH6	Complete Genome
GCF_002925525.1	PRJNA224116	SAMN07974445	562	Escherichia coli	YDC107	Complete Genome
GCF_002934025.1	PRJNA224116	SAMN05290638	562	Escherichia coli	DTU-1	Complete Genome
GCF_002934895.1	PRJNA224116	SAMN03455998	562	Escherichia coli	ECONIH4	Complete Genome
GCF_002944935.1	PRJNA224116	SAMN03996288	562	Escherichia coli	FDAARGOS_144	Complete Genome
GCF_002945135.3	PRJNA224116	SAMN06209723	562	Escherichia coli	WCHEC005237	Complete Genome
GCF_002946715.1	PRJNA224116	SAMN08498861	562	Escherichia coli	266917_2	Complete Genome
GCF_002948655.1	PRJNA224116	SAMN04014918	562	Escherichia coli	AR_0077	Complete Genome
GCF_002951655.1	PRJNA224116	SAMN06219553	562	Escherichia coli	13P477T	Complete Genome
GCF_002951675.1	PRJNA224116	SAMN06219546	562	Escherichia coli	Combat2C1	Complete Genome
GCF_002951695.1	PRJNA224116	SAMN06219547	562	Escherichia coli	Combat13F7	Complete Genome
GCF_002951715.1	PRJNA224116	SAMN06219548	562	Escherichia coli	13KWH46	Complete Genome
GCF_002951735.1	PRJNA224116	SAMN06219554	562	Escherichia coli	13P484A	Complete Genome
GCF_002951755.1	PRJNA224116	SAMN06219549	562	Escherichia coli	13TMH22	Complete Genome
GCF_002951775.1	PRJNA224116	SAMN06219550	562	Escherichia coli	13C1065T	Complete Genome
GCF_002951795.1	PRJNA224116	SAMN06219551	562	Escherichia coli	13C1079T	Complete Genome
GCF_002951855.1	PRJNA224116	SAMN06250205	562	Escherichia coli	FHI_NMBU_03	Complete Genome
GCF_002952095.1	PRJNA224116	SAMN07187744	562	Escherichia coli	Combat11I9	Complete Genome
GCF_002952695.1	PRJNA224116	SAMN05210898	562	Escherichia coli	FORC_042	Complete Genome
GCF_002952855.1	PRJNA224116	SAMN08380018	562	Escherichia coli	7FA	Complete Genome
GCF_002952875.1	PRJNA224116	SAMN08380016	562	Escherichia coli	6FA	Complete Genome
GCF_002952895.1	PRJNA224116	SAMN08380015	562	Escherichia coli	6A	Complete Genome
GCF_002952915.1	PRJNA224116	SAMN08380010	562	Escherichia coli	3FA	Complete Genome
GCF_002952935.1	PRJNA224116	SAMN08380008	562	Escherichia coli	3A	Complete Genome
GCF_002952955.1	PRJNA224116	SAMN08380003	562	Escherichia coli	2_0	Complete Genome
GCF_002952995.1	PRJNA224116	SAMN08380021	562	Escherichia coli	9A	Complete Genome
GCF_002953015.1	PRJNA224116	SAMN08380022	562	Escherichia coli	9FA	Complete Genome
GCF_002953035.1	PRJNA224116	SAMN08380019	562	Escherichia coli	8A	Complete Genome
GCF_002953055.1	PRJNA224116	SAMN08380013	562	Escherichia coli	5A	Complete Genome
GCF_002953075.1	PRJNA224116	SAMN08380006	562	Escherichia coli	2FA	Complete Genome
GCF_002953095.1	PRJNA224116	SAMN08380002	562	Escherichia coli	1FA	Complete Genome
GCF_002953435.1	PRJNA224116	SAMN08409128	562	Escherichia coli	HS13-1	Complete Genome
GCF_002953455.1	PRJNA224116	SAMN08369073	562	Escherichia coli	KBN10P04869	Complete Genome
GCF_002953755.1	PRJNA224116	SAMN08380020	562	Escherichia coli	8FA	Complete Genome
GCF_002953775.1	PRJNA224116	SAMN08380017	562	Escherichia coli	7A	Complete Genome
GCF_002953795.1	PRJNA224116	SAMN08380014	562	Escherichia coli	5FA	Complete Genome
GCF_002953815.1	PRJNA224116	SAMN08380012	562	Escherichia coli	4FA	Complete Genome
GCF_002953835.1	PRJNA224116	SAMN08380011	562	Escherichia coli	4A	Complete Genome
GCF_002953855.1	PRJNA224116	SAMN08380005	562	Escherichia coli	2F_0	Complete Genome
GCF_002953875.1	PRJNA224116	SAMN08380004	562	Escherichia coli	2A	Complete Genome
GCF_002953895.1	PRJNA224116	SAMN08380000	562	Escherichia coli	1A	Complete Genome
GCF_002966755.1	PRJNA224116	SAMN06341081	562	Escherichia coli	WB61	Complete Genome
GCF_002968715.1	PRJNA224116	SAMN07291512	562	Escherichia coli	AR_0369	Complete Genome
GCF_002968735.1	PRJNA224116	SAMN07291515	562	Escherichia coli	AR_0372	Complete Genome
GCF_002968935.1	PRJNA224116	SAMN06219552	562	Escherichia coli	13P460A	Complete Genome
GCF_002983645.1	PRJNA224116	SAMN06173362	1038927	Escherichia coli O104:H4	FDAARGOS_349	Complete Genome
GCF_002993265.1	PRJNA224116	SAMN08630919	562	Escherichia coli	AS19-RrmA-	Complete Genome
GCF_002996665.1	PRJNA224116	SAMN08619547	562	Escherichia coli	EC11	Complete Genome
GCF_002996945.1	PRJNA224116	SAMN04014922	562	Escherichia coli	AR_0081	Complete Genome
GCF_002999075.1	PRJNA224116	SAMN07291517	562	Escherichia coli	AR_0374	Complete Genome
GCF_003013205.1	PRJNA224116	SAMN08581173	562	Escherichia coli	RM14721	Complete Genome
GCF_003017375.1	PRJNA224116	SAMN08579553	562	Escherichia coli	2015C-3163	Complete Genome
GCF_003017455.1	PRJNA224116	SAMN08579554	562	Escherichia coli	2015C-3101	Complete Genome
GCF_003017555.1	PRJNA224116	SAMN08579555	562	Escherichia coli	2015C-3108	Complete Genome
GCF_003017615.1	PRJNA224116	SAMN08579556	562	Escherichia coli	2014C-4135	Complete Genome
GCF_003017765.1	PRJNA224116	SAMN08579559	562	Escherichia coli	2013C-3033	Complete Genome
GCF_003017805.1	PRJNA224116	SAMN08579560	562	Escherichia coli	2013C-4830	Complete Genome
GCF_003017915.1	PRJNA224116	SAMN08579564	562	Escherichia coli	2014C-3051	Complete Genome
GCF_003017935.1	PRJNA224116	SAMN08579565	562	Escherichia coli	2015C-3121	Complete Genome
GCF_003017955.1	PRJNA224116	SAMN03024518	562	Escherichia coli	2014C-3946	Complete Genome
GCF_003017975.1	PRJNA224116	SAMN04516926	562	Escherichia coli	2013C-4361	Complete Genome
GCF_003017995.1	PRJNA224116	SAMN08579572	562	Escherichia coli	2014C-3307	Complete Genome
GCF_003018035.1	PRJNA224116	SAMN04482320	562	Escherichia coli	2015C-4944	Complete Genome
GCF_003018055.1	PRJNA224116	SAMN02991246	562	Escherichia coli	2013C-3252	Complete Genome
GCF_003018075.1	PRJNA224116	SAMN08579580	562	Escherichia coli	2013C-3492	Complete Genome
GCF_003018095.1	PRJNA224116	SAMN08579583	562	Escherichia coli	2014C-3338	Complete Genome
GCF_003018115.1	PRJNA224116	SAMN08579585	562	Escherichia coli	88-3493	Complete Genome
GCF_003018135.1	PRJNA224116	SAMN03569438	562	Escherichia coli	2014C-3050	Complete Genome
GCF_003018155.1	PRJNA224116	SAMN08579591	562	Escherichia coli	2014C-3061	Complete Genome
GCF_003018195.1	PRJNA224116	SAMN08579571	562	Escherichia coli	89-3156	Complete Genome
GCF_003018215.1	PRJNA224116	SAMN08579573	562	Escherichia coli	2015C-3905	Complete Genome
GCF_003018235.1	PRJNA224116	SAMN08579578	562	Escherichia coli	2012C-4221	Complete Genome
GCF_003018255.1	PRJNA224116	SAMN08579579	562	Escherichia coli	2012C-4502	Complete Genome
GCF_003018275.1	PRJNA224116	SAMN08579582	562	Escherichia coli	2014C-3097	Complete Genome
GCF_003018315.1	PRJNA224116	SAMN08579595	562	Escherichia coli	2013C-3513	Complete Genome
GCF_003018355.1	PRJNA224116	SAMN08579602	562	Escherichia coli	00-3076	Complete Genome
GCF_003018375.1	PRJNA224116	SAMN08579604	562	Escherichia coli	2013C-4974	Complete Genome
GCF_003018395.1	PRJNA224116	SAMN08579605	562	Escherichia coli	2014C-3011	Complete Genome
GCF_003018455.1	PRJNA224116	SAMN08638904	562	Escherichia coli	97-3250	Complete Genome
GCF_003018475.1	PRJNA224116	SAMN08579593	562	Escherichia coli	2015C-4136CT1	Complete Genome
GCF_003018495.1	PRJNA224116	SAMN08579594	562	Escherichia coli	2015C-4498	Complete Genome
GCF_003018535.1	PRJNA224116	SAMN04558451	562	Escherichia coli	2013C-4081	Complete Genome
GCF_003018555.1	PRJNA224116	SAMN08579596	562	Escherichia coli	2013C-4225	Complete Genome
GCF_003018575.1	PRJNA224116	SAMN08579598	562	Escherichia coli	2013C-4538	Complete Genome
GCF_003018615.1	PRJNA224116	SAMN08579603	562	Escherichia coli	2012EL-2448	Complete Genome
GCF_003018635.1	PRJNA224116	SAMN08579608	562	Escherichia coli	86-3153	Complete Genome
GCF_003018655.1	PRJNA224116	SAMN02991250	562	Escherichia coli	2013C-3181	Complete Genome
GCF_003018695.1	PRJNA224116	SAMN08579558	562	Escherichia coli	2015C-3107	Complete Genome
GCF_003018715.1	PRJNA224116	SAMN02991240	562	Escherichia coli	2013C-3277	Complete Genome
GCF_003018755.1	PRJNA224116	SAMN08579566	562	Escherichia coli	2014C-4587	Complete Genome
GCF_003018775.1	PRJNA224116	SAMN03098211	562	Escherichia coli	2014C-3655	Complete Genome
GCF_003018795.1	PRJNA224116	SAMN04498549	562	Escherichia coli	2012C-4606	Complete Genome
GCF_003018815.1	PRJNA224116	SAMN08579568	562	Escherichia coli	2013C-4991	Complete Genome
GCF_003018855.1	PRJNA224116	SAMN08579574	562	Escherichia coli	05-3629	Complete Genome
GCF_003018875.1	PRJNA224116	SAMN04498485	562	Escherichia coli	2013C-3250	Complete Genome
GCF_003018895.1	PRJNA224116	SAMN08579576	562	Escherichia coli	2014C-3057	Complete Genome
GCF_003018915.1	PRJNA224116	SAMN08579577	562	Escherichia coli	2011C-4251	Complete Genome
GCF_003018935.1	PRJNA224116	SAMN03098208	562	Escherichia coli	2014C-3599	Complete Genome
GCF_003018995.1	PRJNA224116	SAMN08579569	562	Escherichia coli	95-3192	Complete Genome
GCF_003019015.1	PRJNA224116	SAMN08579570	562	Escherichia coli	88-3001	Complete Genome
GCF_003019035.1	PRJNA224116	SAMN08579581	562	Escherichia coli	2014C-3075	Complete Genome
GCF_003019055.1	PRJNA224116	SAMN08579584	562	Escherichia coli	2014C-4423	Complete Genome
GCF_003019075.1	PRJNA224116	SAMN08579586	562	Escherichia coli	90-3040	Complete Genome
GCF_003019095.1	PRJNA224116	SAMN08579587	562	Escherichia coli	95-3322	Complete Genome
GCF_003019115.1	PRJNA224116	SAMN08630964	562	Escherichia coli		Complete Genome
GCF_003019155.1	PRJNA224116	SAMN02991245	562	Escherichia coli	2013C-3264	Complete Genome
GCF_003019175.1	PRJNA224116	SAMN08579590	562	Escherichia coli	2013C-4187	Complete Genome
GCF_003019215.1	PRJNA224116	SAMN08579610	562	Escherichia coli	2013C-3342	Complete Genome
GCF_003019235.1	PRJNA224116	SAMN08579601	562	Escherichia coli	2015C-3125	Complete Genome
GCF_003020885.1	PRJNA224116	SAMN08469740	562	Escherichia coli	MS7163	Complete Genome
GCF_003030025.1	PRJNA224116	SAMN08663435	562	Escherichia coli	CFSAN064036	Complete Genome
GCF_003030245.1	PRJNA224116	SAMN08668598	562	Escherichia coli	CFSAN018748	Complete Genome
GCF_003030365.1	PRJNA224116	SAMN08212052	562	Escherichia coli	675SK2	Complete Genome
GCF_003031225.1	PRJNA224116	SAMN06448755	562	Escherichia coli	HKUOPY1	Complete Genome
GCF_003031735.1	PRJNA224116	SAMN04393397	562	Escherichia coli	165	Complete Genome
GCF_003031775.1	PRJNA224116	SAMN05194389	562	Escherichia coli	219	Complete Genome
GCF_003031795.1	PRJNA224116	SAMN05194390	562	Escherichia coli	222	Complete Genome
GCF_003031815.1	PRJNA224116	SAMN04622917	562	Escherichia coli	190	Complete Genome
GCF_003033905.1	PRJNA224116	SAMN08202527	562	Escherichia coli	26561	Complete Genome
GCF_003043915.1	PRJNA224116	SAMN08581175	562	Escherichia coli	RM14723	Complete Genome
GCF_003044015.1	PRJNA224116	SAMN08581174	562	Escherichia coli	RM14715	Complete Genome
GCF_003051985.2	PRJNA224116	SAMN06209728	562	Escherichia coli	WCHEC005784	Complete Genome
GCF_003052645.1	PRJNA224116	SAMN08874679	562	Escherichia coli	J53	Complete Genome
GCF_003052665.1	PRJNA224116	SAMN08874680	562	Escherichia coli	ME8067	Complete Genome
GCF_003073815.1	PRJNA224116	SAMN07291530	562	Escherichia coli	AR437	Complete Genome
GCF_003073835.1	PRJNA224116	SAMN07291528	562	Escherichia coli	AR435	Complete Genome
GCF_003073875.1	PRJNA224116	SAMN07291529	562	Escherichia coli	AR436	Complete Genome
GCF_003073955.1	PRJNA224116	SAMN07291527	562	Escherichia coli	AR434	Complete Genome
GCF_003076395.1	PRJNA224116	SAMN06649969	562	Escherichia coli	ZJ3920	Complete Genome
GCF_003095635.1	PRJNA224116	SAMN08993917	562	Escherichia coli	104	Complete Genome
GCF_003111785.1	PRJNA224116	SAMN08932127	562	Escherichia coli	H9Ecoli	Complete Genome
GCF_003112145.1	PRJNA224116	SAMN08724618	1055543	Escherichia coli O121 str. RM8352	RM8352	Complete Genome
GCF_003112165.1	PRJNA224116	SAMN08724650	1055540	Escherichia coli O103 str. RM8385	RM8385	Complete Genome
GCF_003112185.1	PRJNA224116	SAMN08724651	1055533	Escherichia coli O26 str. RM8426	RM8426	Complete Genome
GCF_003112205.1	PRJNA224116	SAMN08165042	1055541	Escherichia coli O43 str. RM10042	RM10042	Complete Genome
GCF_003112225.1	PRJNA224116	SAMN08724660	1055534	Escherichia coli O26 str. RM10386	RM10386	Complete Genome
GCF_003112245.1	PRJNA224116	SAMN08724616	1055542	Escherichia coli O111 str. RM9322	RM9322	Complete Genome
GCF_003122105.1	PRJNA224116	SAMN08765149	562	Escherichia coli	ECCRA-119	Complete Genome
GCF_003172465.2	PRJNA224116	SAMN08932768	562	Escherichia coli	WCHEC035053S1G0	Complete Genome
GCF_003176855.1	PRJNA224116	SAMN08724662	562	Escherichia coli	RM10466	Complete Genome
GCF_003180975.1	PRJNA224116	SAMN09245645	562	Escherichia coli	DA33133	Complete Genome
GCF_003180995.1	PRJNA224116	SAMN09245647	562	Escherichia coli	DA33137	Complete Genome
GCF_003181035.1	PRJNA224116	SAMN09245744	562	Escherichia coli	DA33135	Complete Genome
GCF_003194345.1	PRJNA224116	SAMN08382661	562	Escherichia coli	E41-1	Complete Genome
GCF_003203755.1	PRJNA224116	SAMN09278797	562	Escherichia coli	SD134209	Complete Genome
GCF_003204155.1	PRJNA224116	SAMN04014926	562	Escherichia coli	AR_0085	Complete Genome
GCF_003204955.1	PRJNA224116	SAMN05468123	562	Escherichia coli	2016C-3878	Complete Genome
GCF_003231115.1	PRJNA224116	SAMN09227133	562	Escherichia coli	HS30-1	Complete Genome
GCF_003254065.1	PRJNA224116	SAMN09381942	562	Escherichia coli	51008369SK1	Complete Genome
GCF_003268695.1	PRJNA224116	SAMN09202772	562	Escherichia coli	WCHEC035148	Complete Genome
GCF_003287245.1	PRJNA224116	SAMN09199078	562	Escherichia coli	C	Complete Genome
GCF_003288275.1	PRJNA224116	SAMN08823043	562	Escherichia coli	RM9975	Complete Genome
GCF_003288295.1	PRJNA224116	SAMN08822959	562	Escherichia coli	RM9131	Complete Genome
GCF_003288415.1	PRJNA224116	SAMN07291545	562	Escherichia coli	AR_452	Complete Genome
GCF_003288455.1	PRJNA224116	SAMN07291544	562	Escherichia coli	AR_451	Complete Genome
GCF_003290205.1	PRJNA224116	SAMN06459520	562	Escherichia coli	99-3165	Complete Genome
GCF_003308955.1	PRJNA224116	SAMN09534373	562	Escherichia coli	2017C-4109	Complete Genome
GCF_003308975.1	PRJNA224116	SAMN09534372	562	Escherichia coli	2017C-4173W12	Complete Genome
GCF_003325975.1	PRJNA224116	SAMN09640158	562	Escherichia coli	AMSHJX01	Complete Genome
GCF_003336405.1	PRJNA224116	SAMN09662618	562	Escherichia coli	AMSCJX02	Complete Genome
GCF_003342715.1	PRJNA224116	SAMN08663441	562	Escherichia coli	CFSAN064035	Complete Genome
GCF_003344465.1	PRJNA224116	SAMN09462202	562	Escherichia coli	MCJCHV-1	Complete Genome
GCF_003346835.1	PRJNA224116	SAMN09710898	562	Escherichia coli	Es_ST80_L1_NDM_10_2017	Complete Genome
GCF_003351385.1	PRJNA224116	SAMN09693981	562	Escherichia coli	Es_ST410_NW1_NDM_09_2017	Complete Genome
GCF_003351485.1	PRJNA224116	SAMN09704974	562	Escherichia coli	M16807	Complete Genome
GCF_003352425.1	PRJNA224116	SAMN07411561	562	Escherichia coli	FORC 064	Complete Genome
GCF_003355175.1	PRJNA224116	SAMN09729056	562	Escherichia coli	ST2350	Complete Genome
GCF_003367885.1	PRJNA224116	SAMN09260320	562	Escherichia coli	C600	Complete Genome
GCF_003402955.1	PRJNA224116	SAMN09630238	562	Escherichia coli	cq9	Complete Genome
GCF_003410275.1	PRJNA224116	SAMN04448503	562	Escherichia coli	N3	Complete Genome
GCF_003413625.1	PRJNA224116	SAMN09829654	562	Escherichia coli	UK_Dog_Liverpool	Complete Genome
GCF_003432305.1	PRJNA224116	SAMN09845286	562	Escherichia coli	2452	Complete Genome
GCF_003433275.1	PRJNA224116	SAMN02928551	1200752	Escherichia coli NCCP15648	NCCP15648	Complete Genome
GCF_003443795.1	PRJNA224116	SAMN09287630	562	Escherichia coli	E706	Complete Genome
GCF_003443815.1	PRJNA224116	SAMN09499316	562	Escherichia coli	E308	Complete Genome
GCF_003491165.1	PRJNA224116	SAMN07436715	562	Escherichia coli	FORC_069	Complete Genome
GCF_003546975.1	PRJNA224116	SAMN07451663	316435	Escherichia coli Nissle 1917	Nissle 1917	Complete Genome
GCF_003570765.1	PRJNA224116	SAMN03963234	562	Escherichia coli	GE3	Complete Genome
GCF_003571665.1	PRJNA224116	SAMN04014927	562	Escherichia coli	AR_0086	Complete Genome
GCF_003571685.1	PRJNA224116	SAMN04014854	562	Escherichia coli	AR_0013	Complete Genome
GCF_003571765.1	PRJNA224116	SAMN10023797	562	Escherichia coli	ECCWS199	Complete Genome
GCF_003571785.1	PRJNA224116	SAMN04014908	562	Escherichia coli	AR_0067	Complete Genome
GCF_003571825.1	PRJNA224116	SAMN04014930	562	Escherichia coli	AR_0089	Complete Genome
GCF_003586045.1	PRJNA224116	SAMN06445833	1392854	Escherichia coli M8	M8	Complete Genome
GCF_003586065.1	PRJNA224116	SAMN08724661	1055544	Escherichia coli O145 str. RM9872	RM9872	Complete Genome
GCF_003591595.1	PRJNA224116	SAMN07510752	481805	Escherichia coli ATCC 8739	ATCC 8739	Complete Genome
GCF_003627195.1	PRJNA224116	SAMN10139565	511145	Escherichia coli str. K-12 substr. MG1655	K-12 substr. MG1655	Complete Genome
GCF_003627855.1	PRJNA224116	SAMN10112494	562	Escherichia coli	118UI	Complete Genome
GCF_003667385.1	PRJNA224116	SAMN10230268	562	Escherichia coli	BE2-5	Complete Genome
GCF_003667405.1	PRJNA224116	SAMN10230267	562	Escherichia coli	W2-5	Complete Genome
GCF_003667425.1	PRJNA224116	SAMN10230266	562	Escherichia coli	W5-6	Complete Genome
GCF_003691425.1	PRJNA224116	SAMN10250173	562	Escherichia coli	CP53	Complete Genome
GCF_003697165.2	PRJNA224116	SAMN10252913	866789	Escherichia coli DSM 30083 = JCM 1649 = ATCC 11775	ATCC 11775	Complete Genome
GCF_003703795.1	PRJNA224116	SAMN10023796	562	Escherichia coli	ECCHD184	Complete Genome
GCF_003711005.1	PRJNA224116	SAMN10319568	562	Escherichia coli	L73	Complete Genome
GCF_003711045.1	PRJNA224116	SAMN08932733	562	Escherichia coli	WCHEC020031	Complete Genome
GCF_003717595.1	PRJNA224116	SAMN09483841	562	Escherichia coli	ER1709	Complete Genome
GCF_003722195.1	PRJNA224116	SAMN10364854	83334	Escherichia coli O157:H7	TR01	Complete Genome
GCF_003790525.1	PRJNA224116	SAMN07723175	562	Escherichia coli		Complete Genome
GCF_003812625.1	PRJNA224116	SAMN10163231	562	Escherichia coli	FDAARGOS_536	Complete Genome
GCF_003812945.1	PRJNA224116	SAMN10163173	562	Escherichia coli	FDAARGOS_497	Complete Genome
GCF_003813145.1	PRJNA224116	SAMN04158294	562	Escherichia coli	50579417	Complete Genome
GCF_003856575.1	PRJNA224116	SAMN07760933	562	Escherichia coli	2004-02-01	Complete Genome
GCF_003856615.1	PRJNA224116	SAMN07760930	562	Escherichia coli	4/0	Complete Genome
GCF_003856635.1	PRJNA224116	SAMN07760925	562	Escherichia coli	2/0	Complete Genome
GCF_003856655.1	PRJNA224116	SAMN07760938	562	Escherichia coli	2021-04-04	Complete Genome
GCF_003856675.1	PRJNA224116	SAMN07760941	562	Escherichia coli	2021-07-02	Complete Genome
GCF_003856695.1	PRJNA224116	SAMN07760931	562	Escherichia coli	2004-01-01	Complete Genome
GCF_003856995.1	PRJNA224116	SAMN07411973	562	Escherichia coli	SA186	Complete Genome
GCF_003925895.1	PRJNA224116	SAMD00059754	562	Escherichia coli	M217	Complete Genome
GCF_003956165.1	PRJNA224116	SAMN08161196	562	Escherichia coli	504838	Complete Genome
GCF_003956185.1	PRJNA224116	SAMN08161313	562	Escherichia coli	504237	Complete Genome
GCF_003956205.1	PRJNA224116	SAMN08161280	562	Escherichia coli	204446	Complete Genome
GCF_003956225.1	PRJNA224116	SAMN08161275	562	Escherichia coli	203740	Complete Genome
GCF_003956245.1	PRJNA224116	SAMN08161344	562	Escherichia coli	214-4	Complete Genome
GCF_003956265.1	PRJNA224116	SAMN08161314	562	Escherichia coli	510016	Complete Genome
GCF_003956285.1	PRJNA224116	SAMN08161311	562	Escherichia coli	503829	Complete Genome
GCF_003956305.1	PRJNA224116	SAMN08161146	562	Escherichia coli	300709	Complete Genome
GCF_003956325.1	PRJNA224116	SAMN08161256	562	Escherichia coli	103605	Complete Genome
GCF_003956345.1	PRJNA224116	SAMN08161340	562	Escherichia coli	720632	Complete Genome
GCF_003956365.1	PRJNA224116	SAMN08161318	562	Escherichia coli	602354	Complete Genome
GCF_003956385.1	PRJNA224116	SAMN08161317	562	Escherichia coli	600468	Complete Genome
GCF_003956405.1	PRJNA224116	SAMN08161195	562	Escherichia coli	504239	Complete Genome
GCF_003956425.1	PRJNA224116	SAMN08161312	562	Escherichia coli	504211	Complete Genome
GCF_003956445.1	PRJNA224116	SAMN08161308	562	Escherichia coli	503440	Complete Genome
GCF_003956465.1	PRJNA224116	SAMN08161306	562	Escherichia coli	503025	Complete Genome
GCF_003956485.1	PRJNA224116	SAMN08161259	562	Escherichia coli	120899	Complete Genome
GCF_003966425.1	PRJNA224116	SAMD00129666	562	Escherichia coli	E2855	Complete Genome
GCF_003966445.1	PRJNA224116	SAMD00129667	562	Escherichia coli	E2863	Complete Genome
GCF_003966465.1	PRJNA224116	SAMD00129668	562	Escherichia coli	E2865	Complete Genome
GCF_003966775.1	PRJNA224116	SAMD00127374	562	Escherichia coli	SK1144	Complete Genome
GCF_003966795.1	PRJNA224116	SAMD00108492	83334	Escherichia coli O157:H7	PV15-279	Complete Genome
GCF_003971215.1	PRJNA224116	SAMN10606937	562	Escherichia coli	L37	Complete Genome
GCF_003991155.1	PRJNA224116	SAMN09717320	562	Escherichia coli	EC17GD31	Complete Genome
GCF_003999795.1	PRJNA224116	SAMN10623993	562	Escherichia coli	L65	Complete Genome
GCF_004006545.1	PRJNA224116	SAMN10667090	562	Escherichia coli	ECZP248	Complete Genome
GCF_004006575.1	PRJNA224116	SAMN07759721	562	Escherichia coli	ECCNB20-2	Complete Genome
GCF_004010575.1	PRJNA224116	SAMN04531139	562	Escherichia coli	2009C-3554	Complete Genome
GCF_004010595.1	PRJNA224116	SAMN09533786	562	Escherichia coli	2009C-3378	Complete Genome
GCF_004010615.1	PRJNA224116	SAMN04504881	562	Escherichia coli	08-3918	Complete Genome
GCF_004010635.1	PRJNA224116	SAMN04549651	562	Escherichia coli	06-3462	Complete Genome
GCF_004010655.1	PRJNA224116	SAMN04531170	562	Escherichia coli	2009C-4687	Complete Genome
GCF_004010675.1	PRJNA224116	SAMN04549845	562	Escherichia coli	2010C-3347	Complete Genome
GCF_004010695.1	PRJNA224116	SAMN04505650	562	Escherichia coli	2010C-3142	Complete Genome
GCF_004010715.1	PRJNA224116	SAMN04504880	562	Escherichia coli	08-3914	Complete Genome
GCF_004022505.2	PRJNA224116	SAMN10713359	562	Escherichia coli	MT102	Complete Genome
GCF_004088295.1	PRJNA224116	SAMN10743440	562	Escherichia coli	EC25	Complete Genome
GCF_004114395.1	PRJNA224116	SAMN10535911	562	Escherichia coli	RS571	Complete Genome
GCF_004118915.1	PRJNA224116	SAMN10790219	83334	Escherichia coli O157:H7	C1-057	Complete Genome
GCF_004135125.1	PRJNA224116	SAMN10824104	562	Escherichia coli	NissleGFP_pZE21	Complete Genome
GCF_004135165.1	PRJNA224116	SAMN10817700	562	Escherichia coli	U13A	Complete Genome
GCF_004135775.1	PRJNA224116	SAMN10531472	562	Escherichia coli	CRE1	Complete Genome
GCF_004135815.1	PRJNA224116	SAMN10531954	562	Escherichia coli	CRE10	Complete Genome
GCF_004135855.1	PRJNA224116	SAMN08450093	562	Escherichia coli	FORC_082	Complete Genome
GCF_004135915.1	PRJNA224116	SAMN10836813	562	Escherichia coli	U14A	Complete Genome
GCF_004141955.1	PRJNA224116	SAMN10817475	562	Escherichia coli	U12A	Complete Genome
GCF_004193755.1	PRJNA224116	SAMN10837069	562	Escherichia coli	U15A	Complete Genome
GCF_004295365.1	PRJNA224116	SAMN10956393	562	Escherichia coli	WCHEC025970	Complete Genome
GCF_004299805.1	PRJNA224116	SAMN10879429	562	Escherichia coli	S65EC	Complete Genome
GCF_004301465.1	PRJNA224116	SAMN10219252	562	Escherichia coli	L725	Complete Genome
GCF_004328685.1	PRJNA224116	SAMN10768946	562	Escherichia coli	D72	Complete Genome
GCF_004355105.1	PRJNA224116	SAMN11080426	679895	Escherichia coli BW25113	AM187	Complete Genome
GCF_004358365.1	PRJNA224116	SAMN10604455	562	Escherichia coli	CFSAN027346	Complete Genome
GCF_004358385.1	PRJNA224116	SAMN10604456	562	Escherichia coli	CFSAN027350	Complete Genome
GCF_004358405.1	PRJNA224116	SAMN10604454	562	Escherichia coli	CFSAN027343	Complete Genome
GCF_004358965.1	PRJNA224116	SAMN08823450	562	Escherichia coli	CJ236	Complete Genome
GCF_004358985.1	PRJNA224116	SAMN08824586	562	Escherichia coli	BH212	Complete Genome
GCF_004368015.1	PRJNA224116	SAMN08660891	562	Escherichia coli	FORC_081	Complete Genome
GCF_004377995.2	PRJNA224116	SAMN11130353	562	Escherichia coli	1517k	Complete Genome
GCF_004405205.2	PRJNA224116	SAMN11174938	562	Escherichia coli	GZ04-0086	Complete Genome
GCF_004526255.1	PRJNA224116	SAMN10986381	562	Escherichia coli	2 HS-C	Complete Genome
GCF_004564035.1	PRJNA224116	SAMN10740161	562	Escherichia coli	04-00955	Complete Genome
GCF_004564175.1	PRJNA224116	SAMN04096281	562	Escherichia coli	103	Complete Genome
GCF_004759025.1	PRJNA224116	SAMN08963308	562	Escherichia coli	28Eco12	Complete Genome
GCF_004771135.1	PRJNA224116	SAMN08737532	2126982	Escherichia coli O18:H1	CFSAN067215	Complete Genome
GCF_004771235.1	PRJNA224116	SAMN11333172	562	Escherichia coli	PF9285	Complete Genome
GCF_004792495.1	PRJNA224116	SAMN11268910	562	Escherichia coli	PigCaeca_2	Complete Genome
GCF_004801575.1	PRJNA224116	SAMN11268909	562	Escherichia coli	PigCaeca_1	Complete Genome
GCF_004804185.1	PRJNA224116	SAMN11266496	562	Escherichia coli	377323_2f	Complete Genome
GCF_004804205.1	PRJNA224116	SAMN11266257	562	Escherichia coli	382634_2f	Complete Genome
GCF_004924255.1	PRJNA224116	SAMN11087650	562	Escherichia coli	YSP8-1	Complete Genome
GCF_004924275.1	PRJNA224116	SAMN11087649	562	Escherichia coli	LHM10-1	Complete Genome
GCF_004924355.1	PRJNA224116	SAMN11180601	562	Escherichia coli	G3X16-2	Complete Genome
GCF_005014055.1	PRJNA224116	SAMN08768111	1078021	Escherichia coli O113:H21	FWSEC0010	Complete Genome
GCF_005014075.1	PRJNA224116	SAMN08768110	1038927	Escherichia coli O104:H4	FWSEC0009	Complete Genome
GCF_005037715.1	PRJNA224116	SAMN08768107	991915	Escherichia coli O121:H19	FWSEC0006	Complete Genome
GCF_005037725.1	PRJNA224116	SAMN08768102	244319	Escherichia coli O26:H11	FWSEC0001	Complete Genome
GCF_005037735.1	PRJNA224116	SAMN08768105	83334	Escherichia coli O157:H7	FWSEC0004	Complete Genome
GCF_005037775.1	PRJNA224116	SAMN08768109	577675	Escherichia coli O91:H21	FWSEC0008	Complete Genome
GCF_005037795.1	PRJNA224116	SAMN08768108	376725	Escherichia coli O103:H2	FWSEC0007	Complete Genome
GCF_005037805.1	PRJNA224116	SAMN08768106	373045	Escherichia coli O111:NM	FWSEC0005	Complete Genome
GCF_005037815.1	PRJNA224116	SAMN08768103	991919	Escherichia coli O145:NM	FWSEC0002	Complete Genome
GCF_005037845.1	PRJNA224116	SAMN08768104	1078032	Escherichia coli O45:H2	FWSEC0003	Complete Genome
GCF_005156265.1	PRJNA224116	SAMN11283108	562	Escherichia coli	EC-129	Complete Genome
GCF_005221505.1	PRJNA224116	SAMN08773055	562	Escherichia coli	150	Complete Genome
GCF_005221525.1	PRJNA224116	SAMN08773052	562	Escherichia coli	147	Complete Genome
GCF_005221545.1	PRJNA224116	SAMN08773053	562	Escherichia coli	148	Complete Genome
GCF_005221565.1	PRJNA224116	SAMN08773054	562	Escherichia coli	149	Complete Genome
GCF_005221585.1	PRJNA224116	SAMN08773051	562	Escherichia coli	144	Complete Genome
GCF_005221605.1	PRJNA224116	SAMN08773048	562	Escherichia coli	141	Complete Genome
GCF_005221625.1	PRJNA224116	SAMN08773044	562	Escherichia coli	137	Complete Genome
GCF_005221645.1	PRJNA224116	SAMN08773043	562	Escherichia coli	136	Complete Genome
GCF_005221665.1	PRJNA224116	SAMN08773042	562	Escherichia coli	135	Complete Genome
GCF_005221685.1	PRJNA224116	SAMN08773041	562	Escherichia coli	134	Complete Genome
GCF_005221705.1	PRJNA224116	SAMN08773040	562	Escherichia coli	133	Complete Genome
GCF_005221725.1	PRJNA224116	SAMN08773039	562	Escherichia coli	132	Complete Genome
GCF_005221745.1	PRJNA224116	SAMN08773037	562	Escherichia coli	130	Complete Genome
GCF_005221765.1	PRJNA224116	SAMN08773036	562	Escherichia coli	124	Complete Genome
GCF_005221785.1	PRJNA224116	SAMN08773035	562	Escherichia coli	123	Complete Genome
GCF_005221805.1	PRJNA224116	SAMN08773032	562	Escherichia coli	120	Complete Genome
GCF_005221825.1	PRJNA224116	SAMN08773029	562	Escherichia coli	117	Complete Genome
GCF_005221845.1	PRJNA224116	SAMN08773027	562	Escherichia coli	115	Complete Genome
GCF_005221865.1	PRJNA224116	SAMN08773028	562	Escherichia coli	116	Complete Genome
GCF_005221885.1	PRJNA224116	SAMN08773050	562	Escherichia coli	143	Complete Genome
GCF_005221905.1	PRJNA224116	SAMN08773049	562	Escherichia coli	142	Complete Genome
GCF_005221925.1	PRJNA224116	SAMN08773047	562	Escherichia coli	140	Complete Genome
GCF_005221945.1	PRJNA224116	SAMN08773046	562	Escherichia coli	139	Complete Genome
GCF_005221965.1	PRJNA224116	SAMN08773045	562	Escherichia coli	138	Complete Genome
GCF_005221985.1	PRJNA224116	SAMN08773038	562	Escherichia coli	131	Complete Genome
GCF_005222005.1	PRJNA224116	SAMN08773034	562	Escherichia coli	122	Complete Genome
GCF_005222025.1	PRJNA224116	SAMN08773033	562	Escherichia coli	121	Complete Genome
GCF_005222045.1	PRJNA224116	SAMN08773031	562	Escherichia coli	119	Complete Genome
GCF_005222065.1	PRJNA224116	SAMN08773030	562	Escherichia coli	118	Complete Genome
GCF_005222265.1	PRJNA224116	SAMN08773026	562	Escherichia coli	114	Complete Genome
GCF_005222285.1	PRJNA224116	SAMN08773024	562	Escherichia coli	112	Complete Genome
GCF_005222305.1	PRJNA224116	SAMN08773021	562	Escherichia coli	109	Complete Genome
GCF_005222325.1	PRJNA224116	SAMN08773020	562	Escherichia coli	108	Complete Genome
GCF_005222345.1	PRJNA224116	SAMN08773018	562	Escherichia coli	106	Complete Genome
GCF_005222365.1	PRJNA224116	SAMN08773017	562	Escherichia coli	105	Complete Genome
GCF_005222385.1	PRJNA224116	SAMN08773025	562	Escherichia coli	113	Complete Genome
GCF_005222405.1	PRJNA224116	SAMN08773023	562	Escherichia coli	111	Complete Genome
GCF_005222425.1	PRJNA224116	SAMN08773022	562	Escherichia coli	110	Complete Genome
GCF_005222445.1	PRJNA224116	SAMN08773019	562	Escherichia coli	107	Complete Genome
GCF_005484365.1	PRJNA224116	SAMN10924275	562	Escherichia coli	AR24.2b	Complete Genome
GCF_005671355.1	PRJNA224116	SAMN08637771	562	Escherichia coli	BA22372	Complete Genome
GCF_005885915.1	PRJNA224116	SAMN11787763	83334	Escherichia coli O157:H7	ECP17-1298	Complete Genome
GCF_005885955.1	PRJNA224116	SAMN11786966	83334	Escherichia coli O157:H7	ECP17-46	Complete Genome
GCF_005886035.1	PRJNA224116	SAMN10887812	562	Escherichia coli	A1_136	Complete Genome
GCF_005890115.1	PRJNA224116	SAMN11841626	562	Escherichia coli	BE104	Complete Genome
GCF_005954605.1	PRJNA224116	SAMN11774882	562	Escherichia coli	KR2009	Complete Genome
GCF_005954625.1	PRJNA224116	SAMN11774881	562	Escherichia coli	EK2009	Complete Genome
GCF_005954725.1	PRJNA224116	SAMN11854565	562	Escherichia coli	S17-1	Complete Genome
GCF_006088875.1	PRJNA224116	SAMN09078534	562	Escherichia coli	3385	Complete Genome
GCF_006337025.1	PRJNA224116	SAMN04158281	562	Escherichia coli	K71-77	Complete Genome
GCF_006351885.1	PRJNA224116	SAMN11974795	562	Escherichia coli	FC853_EC	Complete Genome
GCF_006352265.1	PRJNA224116	SAMN10887807	562	Escherichia coli	A1_181	Complete Genome
GCF_006364695.1	PRJNA224116	SAMN11056487	562	Escherichia coli	FDAARGOS_772	Complete Genome
GCF_006777045.1	PRJNA224116	SAMN12158196	2592065	Escherichia coli O1:H42	CLSC36	Complete Genome
GCF_006777065.1	PRJNA224116	SAMN12158201	562	Escherichia coli	MSHS 472	Complete Genome
GCF_006777085.1	PRJNA224116	SAMN12158203	562	Escherichia coli	MSHS 133	Complete Genome
GCF_006874785.1	PRJNA224116	SAMN01916927	562	Escherichia coli	ATCC 43889	Complete Genome
GCF_006965465.1	PRJNA224116	SAMN11231229	562	Escherichia coli	U1	Complete Genome
GCF_007012305.1	PRJNA224116	SAMN11230749	562	Escherichia coli	ECOL-18-VL-LA-PA-Ryan-0026	Complete Genome
GCF_007632435.1	PRJNA224116	SAMN12330870	562	Escherichia coli	Ec40743	Complete Genome
GCF_007833255.1	PRJNA224116	SAMN12389475	562	Escherichia coli	PU-1	Complete Genome
GCF_007833295.1	PRJNA224116	SAMN12389518	562	Escherichia coli	BCE049	Complete Genome
GCF_007833875.1	PRJNA224116	SAMN11664985	562	Escherichia coli	UPEC132	Complete Genome
GCF_007922655.1	PRJNA224116	SAMN12261986	83334	Escherichia coli O157:H7	ATCC 43888	Complete Genome
GCF_007990655.1	PRJNA224116	SAMD00172295	168927	Escherichia coli O111:H-	110512	Complete Genome
GCF_007995175.1	PRJNA224116	SAMN12384979	562	Escherichia coli	LD91-1	Complete Genome
GCF_008033295.1	PRJNA224116	SAMN12395320	562	Escherichia coli	ATCC BAA-196	Complete Genome
GCF_008033315.1	PRJNA224116	SAMN12395313	562	Escherichia coli	ATCC BAA-196	Complete Genome
GCF_008042015.2	PRJNA224116	SAMN12569951	216592	Escherichia coli 042	42	Complete Genome
GCF_008065435.1	PRJNA224116	SAMN12405405	562	Escherichia coli	RM9088	Complete Genome
GCF_008065455.1	PRJNA224116	SAMN12418786	562	Escherichia coli	RM10410	Complete Genome
GCF_008080655.1	PRJNA224116	SAMN11967557	562	Escherichia coli	YY76-1	Complete Genome
GCF_008124005.1	PRJNA224116	SAMN12603254	2605620	Escherichia coli O80:H26	EC-107	Complete Genome
GCF_008124085.1	PRJNA224116	SAMN12603272	1502658	Escherichia coli O2:H6	PG20180057	Complete Genome
GCF_008124105.1	PRJNA224116	SAMN12603270	2605619	Escherichia coli O16:H48	PG20180171	Complete Genome
GCF_008124125.1	PRJNA224116	SAMN12603271	2605619	Escherichia coli O16:H48	PG20180172	Complete Genome
GCF_008124145.1	PRJNA224116	SAMN12603269	2605619	Escherichia coli O16:H48	PG20180170	Complete Genome
GCF_008124165.1	PRJNA224116	SAMN12603268	2605619	Escherichia coli O16:H48	PG20180175	Complete Genome
GCF_008124185.1	PRJNA224116	SAMN12603267	2605619	Escherichia coli O16:H48	PG20180173	Complete Genome
GCF_008124205.1	PRJNA224116	SAMN12603266	2605619	Escherichia coli O16:H48	PG20180063	Complete Genome
GCF_008124225.1	PRJNA224116	SAMN12603265	2605619	Escherichia coli O16:H48	PG20180062	Complete Genome
GCF_008124245.1	PRJNA224116	SAMN12603264	2605619	Escherichia coli O16:H48	PG20180061	Complete Genome
GCF_008124265.1	PRJNA224116	SAMN12603262	2605619	Escherichia coli O16:H48	PG20180059	Complete Genome
GCF_008124285.1	PRJNA224116	SAMN12603263	2605619	Escherichia coli O16:H48	PG20180060	Complete Genome
GCF_008124305.1	PRJNA224116	SAMN12603260	2605619	Escherichia coli O16:H48	PG20180054	Complete Genome
GCF_008124325.1	PRJNA224116	SAMN12603261	2605619	Escherichia coli O16:H48	PG20180058	Complete Genome
GCF_008124345.1	PRJNA224116	SAMN12603259	2605619	Escherichia coli O16:H48	PG20180053	Complete Genome
GCF_008124365.1	PRJNA224116	SAMN12603258	2605619	Escherichia coli O16:H48	PG20180052	Complete Genome
GCF_008124385.1	PRJNA224116	SAMN12603257	2605619	Escherichia coli O16:H48	PG20180050	Complete Genome
GCF_008124405.1	PRJNA224116	SAMN12603256	2605619	Escherichia coli O16:H48	CV601gfp	Complete Genome
GCF_008124425.1	PRJNA224116	SAMN12619458	562	Escherichia coli	Ec-050	Complete Genome
GCF_008152105.1	PRJNA224116	SAMN12272266	562	Escherichia coli	AR Bank #0349	Complete Genome
GCF_008329665.1	PRJNA224116	SAMN12660184	562	Escherichia coli	ST130	Complete Genome
GCF_008370755.1	PRJNA224116	SAMN12275742	562	Escherichia coli	ESBL 15	Complete Genome
GCF_008375335.1	PRJNA224116	SAMN12263012	562	Escherichia coli	ETEC6	Complete Genome
GCF_008462425.1	PRJNA224116	SAMN12670427	1045010	Escherichia coli O157	Al Ain	Complete Genome
GCF_008632555.1	PRJNA224116	SAMN12736389	562	Escherichia coli	AR202.2	Complete Genome
GCF_008632575.1	PRJNA224116	SAMN12736390	562	Escherichia coli	AR216.2b	Complete Genome
GCF_008632595.1	PRJNA224116	SAMN12757101	562	Escherichia coli	ST95-32	Complete Genome
GCF_008642395.1	PRJNA224116	SAMN10784800	562	Escherichia coli	631	Complete Genome
GCF_008642415.1	PRJNA224116	SAMN10784802	562	Escherichia coli	1500	Complete Genome
GCF_008727135.1	PRJNA224116	SAMN12648980	1045010	Escherichia coli O157	AR-0430	Complete Genome
GCF_008727155.1	PRJNA224116	SAMN12648979	1045010	Escherichia coli O157	AR-0429	Complete Genome
GCF_008727175.1	PRJNA224116	SAMN12648978	1045010	Escherichia coli O157	AR-0428	Complete Genome
GCF_008727195.1	PRJNA224116	SAMN12648977	1045010	Escherichia coli O157	AR-0427	Complete Genome
GCF_008761455.2	PRJNA224116	SAMN12822944	562	Escherichia coli	RM13752	Complete Genome
GCF_008761475.2	PRJNA224116	SAMN12822943	562	Escherichia coli	RM13745	Complete Genome
GCF_008761495.2	PRJNA224116	SAMN12822942	562	Escherichia coli	RM11911	Complete Genome
GCF_008761515.1	PRJNA224116	SAMN12822941	562	Escherichia coli	RM9245	Complete Genome
GCF_008761535.2	PRJNA224116	SAMN12822940	562	Escherichia coli	SJ7	Complete Genome
GCF_008807135.1	PRJNA224116	SAMN12233488	562	Escherichia coli	YPE10	Complete Genome
GCF_008807155.1	PRJNA224116	SAMN12233489	562	Escherichia coli	YPE12	Complete Genome
GCF_008807295.1	PRJNA224116	SAMN12233487	562	Escherichia coli	YPE3	Complete Genome
GCF_008807655.1	PRJNA224116	SAMN09976386	562	Escherichia coli	15.TR.026_OXA	Complete Genome
GCF_008823185.1	PRJNA224116	SAMN12512712	562	Escherichia coli	PK6	Complete Genome
GCF_008824125.1	PRJNA224116	SAMN12262385	562	Escherichia coli	ecMN1F	Complete Genome
GCF_008925965.1	PRJNA224116	SAMN10177969	562	Escherichia coli	NZRM4169	Complete Genome
GCF_008926085.1	PRJNA224116	SAMN10177968	562	Escherichia coli	NZRM4165	Complete Genome
GCF_008926105.1	PRJNA224116	SAMN10177967	562	Escherichia coli	NZRM3614	Complete Genome
GCF_008926125.1	PRJNA224116	SAMN10177966	562	Escherichia coli	ERL06-2503	Complete Genome
GCF_008926145.1	PRJNA224116	SAMN10177965	562	Escherichia coli	ERL06-2497	Complete Genome
GCF_008926165.1	PRJNA224116	SAMN10177964	562	Escherichia coli	ERL06-2442	Complete Genome
GCF_008926185.1	PRJNA224116	SAMN10177963	562	Escherichia coli	ERL05-1306	Complete Genome
GCF_008926305.1	PRJNA224116	SAMN10177962	562	Escherichia coli	ERL05-0623	Complete Genome
GCF_008931135.1	PRJNA224116	SAMN10177961	562	Escherichia coli	ERL04-3476	Complete Genome
GCF_008931185.1	PRJNA224116	SAMN10177960	562	Escherichia coli	ERL03-1416	Complete Genome
GCF_008931725.1	PRJNA224116	SAMN12561908	562	Escherichia coli	JME67	Complete Genome
GCF_008931745.1	PRJNA224116	SAMN12561906	562	Escherichia coli	JME65	Complete Genome
GCF_008931765.1	PRJNA224116	SAMN12561905	562	Escherichia coli	JME64	Complete Genome
GCF_008931865.1	PRJNA224116	SAMN12561907	562	Escherichia coli	JME66	Complete Genome
GCF_008949495.1	PRJNA224116	SAMN10691120	562	Escherichia coli	XDL	Complete Genome
GCF_009176965.1	PRJNA224116	SAMD00168435	562	Escherichia coli	GSH8M-2	Complete Genome
GCF_009363035.1	PRJNA224116	SAMN13021417	562	Escherichia coli	LAU-OXA	Complete Genome
GCF_009395265.1	PRJNA224116	SAMN13000402	562	Escherichia coli	ET12567	Complete Genome
GCF_009431955.1	PRJNA224116	SAMN11633027	562	Escherichia coli	HB6	Complete Genome
GCF_009432215.1	PRJNA224116	SAMN11633026	562	Escherichia coli	F1 E4	Complete Genome
GCF_009432415.1	PRJNA224116	SAMN11633025	562	Escherichia coli	21B8	Complete Genome
GCF_009432635.1	PRJNA224116	SAMN11633024	562	Escherichia coli	F3398	Complete Genome
GCF_009432795.1	PRJNA224116	SAMN11633023	562	Escherichia coli	M7638	Complete Genome
GCF_009432915.1	PRJNA224116	SAMN11633022	562	Escherichia coli	MA11	Complete Genome
GCF_009433135.1	PRJNA224116	SAMN11633021	562	Escherichia coli	CV261	Complete Genome
GCF_009577985.1	PRJNA224116	SAMN12169096	562	Escherichia coli	CCUG 73778	Complete Genome
GCF_009618015.1	PRJNA224116	SAMD00179457	2027293	Escherichia coli O8:H8	16F5M1D1	Complete Genome
GCF_009627495.1	PRJNA224116	SAMN11310481	83334	Escherichia coli O157:H7	TT12B	Complete Genome
GCF_009648495.1	PRJNA224116	SAMN13175516	562	Escherichia coli	DH5alpha	Complete Genome
GCF_009650035.1	PRJNA224116	SAMN11008224	562	Escherichia coli	AUSMDU00014361	Complete Genome
GCF_009650175.1	PRJNA224116	SAMN10574722	83334	Escherichia coli O157:H7	ATCC 43890	Complete Genome
GCF_009663855.1	PRJNA224116	SAMN13226783	562	Escherichia coli	INSC1002	Complete Genome
GCF_009664185.1	PRJNA224116	SAMN12385930	562	Escherichia coli	SL112	Complete Genome
GCF_009664205.1	PRJNA224116	SAMN12385929	562	Escherichia coli	AQ15	Complete Genome
GCF_009664305.1	PRJNA224116	SAMN08167607	562	Escherichia coli	FSIS11705876	Complete Genome
GCF_009664455.1	PRJNA224116	SAMN13191633	562	Escherichia coli	AUSMDU00002545	Complete Genome
GCF_009671045.1	PRJNA224116	SAMN13242665	562	Escherichia coli	1916D18	Complete Genome
GCF_009671085.1	PRJNA224116	SAMN13242769	562	Escherichia coli	1916D6	Complete Genome
GCF_009671105.1	PRJNA224116	SAMN13242782	562	Escherichia coli	1919D3	Complete Genome
GCF_009671125.1	PRJNA224116	SAMN13242790	562	Escherichia coli	1919D62	Complete Genome
GCF_009720465.1	PRJNA224116	SAMN12307470	562	Escherichia coli	EC2	Complete Genome
GCF_009720605.1	PRJNA224116	SAMN13335779	562	Escherichia coli	ECO2947	Complete Genome
GCF_009728565.1	PRJNA224116	SAMN07594018	2491679	Escherichia coli O22:H8	RM10809-3	Complete Genome
GCF_009738145.1	PRJNA224116	SAMN12996975	562	Escherichia coli	NT1F31	Complete Genome
GCF_009738455.1	PRJNA224116	SAMN13429994	562	Escherichia coli	RM19259	Complete Genome
GCF_009761715.1	PRJNA224116	SAMN12027817	562	Escherichia coli	PT109	Complete Genome
GCF_009762365.1	PRJNA224116	SAMN12789776	562	Escherichia coli	P43A	Complete Genome
GCF_009762385.1	PRJNA224116	SAMN12789775	562	Escherichia coli	P276M	Complete Genome
GCF_009762415.1	PRJNA224116	SAMN12789773	562	Escherichia coli	P59A	Complete Genome
GCF_009762495.1	PRJNA224116	SAMN12789774	562	Escherichia coli	P225M	Complete Genome
GCF_009832885.1	PRJNA224116	SAMN13642132	83333	Escherichia coli K-12	K-12	Complete Genome
GCF_009832985.1	PRJNA224116	SAMN13714347	562	Escherichia coli	BL21-AI	Complete Genome
GCF_009866925.1	PRJNA224116	SAMN08522703	562	Escherichia coli	CFS3246	Complete Genome
GCF_009866945.1	PRJNA224116	SAMN08522730	562	Escherichia coli	CFS3273	Complete Genome
GCF_009867015.2	PRJNA224116	SAMN08522749	562	Escherichia coli	CFS3292	Complete Genome
GCF_009867035.1	PRJNA224116	SAMN08522770	562	Escherichia coli	CFS3313	Complete Genome
GCF_009873375.1	PRJNA224116	SAMN12302778	562	Escherichia coli	NCCP 15955	Complete Genome
GCF_009905115.1	PRJNA224116	SAMN13756204	562	Escherichia coli	2EC1	Complete Genome
GCF_009905135.1	PRJNA224116	SAMN13756518	562	Escherichia coli	94EC	Complete Genome
GCF_009905355.1	PRJNA224116	SAMN13829592	562	Escherichia coli	LD27-1	Complete Genome
GCF_009909465.1	PRJNA224116	SAMN13829544	562	Escherichia coli	LD39-1	Complete Genome
GCF_009909485.1	PRJNA224116	SAMN13829575	562	Escherichia coli	LD26-1	Complete Genome
GCF_009909505.1	PRJNA224116	SAMN13829545	562	Escherichia coli	LD93-1	Complete Genome
GCF_009913415.1	PRJNA224116	SAMN13829591	562	Escherichia coli	LD22-1	Complete Genome
GCF_009914295.1	PRJNA224116	SAMN12264954	562	Escherichia coli	PE15	Complete Genome
GCF_009931235.1	PRJNA224116	SAMN10531264	83334	Escherichia coli O157:H7	FRIK804	Complete Genome
GCF_009931435.1	PRJNA224116	SAMN12641172	562	Escherichia coli	EC42405	Complete Genome
GCF_009948655.1	PRJNA224116	SAMN12214771	562	Escherichia coli	STEC719	Complete Genome
GCF_009949145.1	PRJNA224116	SAMN12214770	562	Escherichia coli	STEC711	Complete Genome
GCF_009949705.1	PRJNA224116	SAMN12214769	562	Escherichia coli	STEC409	Complete Genome
GCF_009950125.1	PRJNA224116	SAMN12214768	562	Escherichia coli	STEC388	Complete Genome
GCF_009950475.1	PRJNA224116	SAMN12214767	562	Escherichia coli	STEC367	Complete Genome
GCF_009950805.1	PRJNA224116	SAMN12214766	562	Escherichia coli	STEC316	Complete Genome
GCF_009951245.1	PRJNA224116	SAMN12214765	562	Escherichia coli	STEC313	Complete Genome
GCF_009951745.1	PRJNA224116	SAMN12214764	562	Escherichia coli	STEC309	Complete Genome
GCF_009952125.1	PRJNA224116	SAMN12214763	562	Escherichia coli	STEC005	Complete Genome
GCF_010092405.1	PRJNA224116	SAMN13875146	562	Escherichia coli	GZEC065	Complete Genome
GCF_010092965.1	PRJNA224116	SAMN13880799	562	Escherichia coli	201609	Complete Genome
GCF_010365325.1	PRJNA224116	SAMN13951926	562	Escherichia coli	9	Complete Genome
GCF_010365345.1	PRJNA224116	SAMN13951925	562	Escherichia coli	1932-04-01	Complete Genome
GCF_010365365.1	PRJNA224116	SAMN13951924	562	Escherichia coli	64	Complete Genome
GCF_010365385.1	PRJNA224116	SAMN13951921	562	Escherichia coli	142	Complete Genome
GCF_010365405.1	PRJNA224116	SAMN13951923	562	Escherichia coli	61	Complete Genome
GCF_010365425.1	PRJNA224116	SAMN13951922	562	Escherichia coli	10	Complete Genome
GCF_010365465.1	PRJNA224116	SAMN13951920	562	Escherichia coli	124	Complete Genome
GCF_010365485.1	PRJNA224116	SAMN13951918	562	Escherichia coli	53	Complete Genome
GCF_010365505.1	PRJNA224116	SAMN13951916	562	Escherichia coli	164	Complete Genome
GCF_010365525.1	PRJNA224116	SAMN13951917	562	Escherichia coli	163	Complete Genome
GCF_010365545.1	PRJNA224116	SAMN13951915	562	Escherichia coli	38	Complete Genome
GCF_010509415.1	PRJNA224116	SAMN13925613	562	Escherichia coli	NBRC 3301	Complete Genome
GCF_010668985.1	PRJNA224116	SAMN13978607	562	Escherichia coli	ChlosBP-23-1	Complete Genome
GCF_010669005.1	PRJNA224116	SAMN13978676	562	Escherichia coli	PapRG-06-3	Complete Genome
GCF_010669025.1	PRJNA224116	SAMN13978678	562	Escherichia coli	PapRG-06-5	Complete Genome
GCF_010706435.1	PRJNA224116	SAMN13976059	562	Escherichia coli	GW-AmxH19	Complete Genome
GCF_010724935.1	PRJNA224116	SAMD00108729	562	Escherichia coli	E138	Complete Genome
GCF_010725305.1	PRJNA224116	SAMD00186874	562	Escherichia coli	E302	Complete Genome
GCF_011022275.1	PRJNA224116	SAMN14137859	562	Escherichia coli	190693	Complete Genome
GCF_011044355.1	PRJNA224116	SAMN14149865	562	Escherichia coli	EC28	Complete Genome
GCF_011045215.1	PRJNA224116	SAMN13978668	562	Escherichia coli	PapRG-04-4	Complete Genome
GCF_011045235.1	PRJNA224116	SAMN13978645	562	Escherichia coli	PapM-32-1	Complete Genome
GCF_011045255.1	PRJNA224116	SAMN14149125	562	Escherichia coli	E118	Complete Genome
GCF_011045275.1	PRJNA224116	SAMN14149126	562	Escherichia coli	E597	Complete Genome
GCF_011045295.1	PRJNA224116	SAMN14149127	562	Escherichia coli	E686	Complete Genome
GCF_011045455.1	PRJNA224116	SAMN10246264	562	Escherichia coli	IVRI Kol CP4	Complete Genome
GCF_011045475.1	PRJNA224116	SAMN10246265	562	Escherichia coli	CM IVRI KOL-1	Complete Genome
GCF_011045875.1	PRJNA224116	SAMN13742197	562	Escherichia coli	ZF31	Complete Genome
GCF_011045895.1	PRJNA224116	SAMN13743100	562	Escherichia coli	ZF34	Complete Genome
GCF_011064575.1	PRJNA224116	SAMN12212556	562	Escherichia coli	UMB200201_11	Complete Genome
GCF_011067085.1	PRJNA224116	SAMN14134968	562	Escherichia coli	3R	Complete Genome
GCF_011330935.1	PRJNA224116	SAMN13948684	562	Escherichia coli	p11A	Complete Genome
GCF_011331065.1	PRJNA224116	SAMN13948681	562	Escherichia coli	p10A	Complete Genome
GCF_011331215.1	PRJNA224116	SAMN13948677	562	Escherichia coli	p4A	Complete Genome
GCF_011383085.1	PRJNA224116	SAMN14331243	562	Escherichia coli	JL05	Complete Genome
GCF_011403355.1	PRJNA224116	SAMD00190256	562	Escherichia coli	2017.15.01CC	Complete Genome
GCF_011404215.1	PRJNA224116	SAMD00190245	562	Escherichia coli	2017.01.04CC	Complete Genome
GCF_011404355.1	PRJNA224116	SAMD00190246	562	Escherichia coli	2018-01-1CC	Complete Genome
GCF_011404475.1	PRJNA224116	SAMD00190251	562	Escherichia coli	2018-06-4CC	Complete Genome
GCF_011404595.1	PRJNA224116	SAMD00190253	562	Escherichia coli	2018-10-1CC	Complete Genome
GCF_011404755.1	PRJNA224116	SAMD00190255	562	Escherichia coli	2018-11-3CC	Complete Genome
GCF_011404895.1	PRJNA224116	SAMD00190249	562	Escherichia coli	2018-02-2CC	Complete Genome
GCF_011492885.1	PRJNA224116	SAMN14238615	562	Escherichia coli	T28R	Complete Genome
GCF_011492925.1	PRJNA224116	SAMN14342226	562	Escherichia coli	IBS28	Complete Genome
GCF_011492985.1	PRJNA224116	SAMN13530296	562	Escherichia coli	T16R	Complete Genome
GCF_011691525.1	PRJNA224116	SAMN12026942	562	Escherichia coli	STB20-1	Complete Genome
GCF_011769865.1	PRJNA224116	SAMN14421542	562	Escherichia coli	52148	Complete Genome
GCF_011996085.1	PRJNA224116	SAMN13705263	562	Escherichia coli	CAU16175	Complete Genome
GCF_012044775.1	PRJNA224116	SAMN13978660	562	Escherichia coli	PapM-36-2	Complete Genome
GCF_012149945.1	PRJNA224116	SAMD00198301	562	Escherichia coli	09-02E	Complete Genome
GCF_012221365.1	PRJNA224116	SAMN14482837	562	Escherichia coli	8-3-DC15	Complete Genome
GCF_012221565.1	PRJNA224116	SAMN14482836	562	Escherichia coli	8-3-Ti3	Complete Genome
GCF_012278675.1	PRJNA224116	SAMN12158158	562	Escherichia coli	54	Complete Genome
GCF_012516455.1	PRJNA224116	SAMN14558608	562	Escherichia coli	SFE8	Complete Genome
GCF_012537835.1	PRJNA224116	SAMN14558879	562	Escherichia coli	SCZE5	Complete Genome
GCF_012934435.1	PRJNA224116	SAMN14609768	562	Escherichia coli	SCU-102	Complete Genome
GCF_012934455.1	PRJNA224116	SAMN14609770	562	Escherichia coli	SCU-105	Complete Genome
GCF_012934475.1	PRJNA224116	SAMN14609773	562	Escherichia coli	SCU-108	Complete Genome
GCF_012934495.1	PRJNA224116	SAMN14609774	562	Escherichia coli	SCU-109	Complete Genome
GCF_012934515.1	PRJNA224116	SAMN14609775	562	Escherichia coli	SCU-111	Complete Genome
GCF_012934535.1	PRJNA224116	SAMN14609776	562	Escherichia coli	SCU-112	Complete Genome
GCF_012934555.1	PRJNA224116	SAMN14609778	562	Escherichia coli	SCU-116	Complete Genome
GCF_012934575.1	PRJNA224116	SAMN14609779	562	Escherichia coli	SCU-118	Complete Genome
GCF_012934595.1	PRJNA224116	SAMN14609782	562	Escherichia coli	SCU-122	Complete Genome
GCF_012934615.1	PRJNA224116	SAMN14609783	562	Escherichia coli	SCU-123	Complete Genome
GCF_012934635.1	PRJNA224116	SAMN14609784	562	Escherichia coli	SCU-124	Complete Genome
GCF_012934655.2	PRJNA224116	SAMN14609785	562	Escherichia coli	SCU-125	Complete Genome
GCF_012934675.1	PRJNA224116	SAMN14609787	562	Escherichia coli	SCU-152	Complete Genome
GCF_012934695.1	PRJNA224116	SAMN14609790	562	Escherichia coli	SCU-301	Complete Genome
GCF_012934715.1	PRJNA224116	SAMN14609793	562	Escherichia coli	SCU-313	Complete Genome
GCF_012934765.1	PRJNA224116	SAMN14609795	562	Escherichia coli	SCU-387	Complete Genome
GCF_012934785.1	PRJNA224116	SAMN14609800	562	Escherichia coli	SCU-484	Complete Genome
GCF_012934815.1	PRJNA224116	SAMN14609802	562	Escherichia coli	SCU-486	Complete Genome
GCF_012935215.1	PRJNA224116	SAMN12359680	562	Escherichia coli	CVM N18EC0432	Complete Genome
GCF_012974525.1	PRJNA224116	SAMN14732738	562	Escherichia coli	C21	Complete Genome
GCF_012974565.1	PRJNA224116	SAMN14125718	562	Escherichia coli	SCU-101	Complete Genome
GCF_012974805.1	PRJNA224116	SAMN11042946	562	Escherichia coli	ATCC 25922	Complete Genome
GCF_013004045.1	PRJNA224116	SAMN14785846	562	Escherichia coli	HB37	Complete Genome
GCF_013084945.1	PRJNA224116	SAMN14609791	562	Escherichia coli	SCU-306	Complete Genome
GCF_013085025.1	PRJNA224116	SAMN14609798	562	Escherichia coli	SCU-482	Complete Genome
GCF_013085185.1	PRJNA224116	SAMN14609771	562	Escherichia coli	SCU-106	Complete Genome
GCF_013085205.1	PRJNA224116	SAMN14609801	562	Escherichia coli	SCU-485	Complete Genome
GCF_013085865.1	PRJNA224116	SAMN14609792	562	Escherichia coli	SCU-308	Complete Genome
GCF_013085905.1	PRJNA224116	SAMN14609789	562	Escherichia coli	SCU-204	Complete Genome
GCF_013112335.1	PRJNA224116	SAMN14485346	562	Escherichia coli	GF3-3	Complete Genome
GCF_013122565.1	PRJNA224116	SAMN14485325	562	Escherichia coli	GF4-3	Complete Genome
GCF_013166855.1	PRJNA224116	SAMN14933846	562	Escherichia coli	NEBExpress_Iq	Complete Genome
GCF_013166875.1	PRJNA224116	SAMN14933845	562	Escherichia coli	T7Express_Crystal	Complete Genome
GCF_013166895.1	PRJNA224116	SAMN14933843	562	Escherichia coli	T7Express_LysY	Complete Genome
GCF_013166915.1	PRJNA224116	SAMN14933844	562	Escherichia coli	T7Express_LysYIq	Complete Genome
GCF_013166935.1	PRJNA224116	SAMN14933842	562	Escherichia coli	NEBExpress	Complete Genome
GCF_013166955.1	PRJNA224116	SAMN14933841	562	Escherichia coli	Nico21(DE3)	Complete Genome
GCF_013166975.1	PRJNA224116	SAMN14933840	511693	Escherichia coli BL21	BL21	Complete Genome
GCF_013166995.1	PRJNA224116	SAMN14933838	562	Escherichia coli	Dam/Dcm	Complete Genome
GCF_013167015.1	PRJNA224116	SAMN14933839	469008	Escherichia coli BL21(DE3)	BL21(DE3)	Complete Genome
GCF_013167035.1	PRJNA224116	SAMN14933837	562	Escherichia coli	NEB10-beta	Complete Genome
GCF_013167055.1	PRJNA224116	SAMN14933836	562	Escherichia coli	NEB_Turbo	Complete Genome
GCF_013167075.1	PRJNA224116	SAMN14933835	562	Escherichia coli	NEB5-alpha_F'Iq	Complete Genome
GCF_013167135.1	PRJNA224116	SAMN11267279	83334	Escherichia coli O157:H7	F8492	Complete Genome
GCF_013167155.1	PRJNA224116	SAMN05360245	83334	Escherichia coli O157:H7	YB14-1	Complete Genome
GCF_013167175.1	PRJNA224116	SAMN05360243	83334	Escherichia coli O157:H7	TX 376-2	Complete Genome
GCF_013167195.1	PRJNA224116	SAMN05360242	83334	Escherichia coli O157:H7	TX 265-1	Complete Genome
GCF_013167235.1	PRJNA224116	SAMN05360240	83334	Escherichia coli O157:H7	TB21-1	Complete Genome
GCF_013167255.1	PRJNA224116	SAMN11229499	83334	Escherichia coli O157:H7	TB182A	Complete Genome
GCF_013167275.1	PRJNA224116	SAMN05360237	83334	Escherichia coli O157:H7	SS TX 754-1	Complete Genome
GCF_013167295.1	PRJNA224116	SAMN05360235	83334	Escherichia coli O157:H7	SS TX 313-1	Complete Genome
GCF_013167315.1	PRJNA224116	SAMN05360230	83334	Escherichia coli O157:H7	SS NE 1040-1	Complete Genome
GCF_013167335.1	PRJNA224116	SAMN05360225	83334	Escherichia coli O157:H7	Show KS 470-1	Complete Genome
GCF_013167355.1	PRJNA224116	SAMN11229501	83334	Escherichia coli O157:H7	OK1	Complete Genome
GCF_013167375.1	PRJNA224116	SAMN11229494	83334	Escherichia coli O157:H7	NE92	Complete Genome
GCF_013167395.1	PRJNA224116	SAMN11229495	83334	Escherichia coli O157:H7	NE122	Complete Genome
GCF_013167415.1	PRJNA224116	SAMN11229496	83334	Escherichia coli O157:H7	NE1127	Complete Genome
GCF_013167435.1	PRJNA224116	SAMN05360232	83334	Escherichia coli O157:H7	NE 1169-1	Complete Genome
GCF_013167455.1	PRJNA224116	SAMN05360231	83334	Escherichia coli O157:H7	NE 1092-2	Complete Genome
GCF_013167475.1	PRJNA224116	SAMN05360221	83334	Escherichia coli O157:H7	N8B7-2	Complete Genome
GCF_013167495.1	PRJNA224116	SAMN11229493	83334	Escherichia coli O157:H7	LSU61	Complete Genome
GCF_013167515.1	PRJNA224116	SAMN11229492	83334	Escherichia coli O157:H7	H6437	Complete Genome
GCF_013167535.1	PRJNA224116	SAMN11229491	83334	Escherichia coli O157:H7	H2495	Complete Genome
GCF_013167555.1	PRJNA224116	SAMN05360205	83334	Escherichia coli O157:H7	Gim1-1	Complete Genome
GCF_013167575.1	PRJNA224116	SAMN05360178	83334	Escherichia coli O157:H7	G5295	Complete Genome
GCF_013167595.1	PRJNA224116	SAMN05360175	83334	Escherichia coli O157:H7	F8952	Complete Genome
GCF_013167615.1	PRJNA224116	SAMN05360171	83334	Escherichia coli O157:H7	F8798	Complete Genome
GCF_013167635.1	PRJNA224116	SAMN05360170	83334	Escherichia coli O157:H7	F8797	Complete Genome
GCF_013167655.1	PRJNA224116	SAMN02304041	1343836	Escherichia coli O157:H7 str. F8092B	F8092B	Complete Genome
GCF_013167675.1	PRJNA224116	SAMN05360163	83334	Escherichia coli O157:H7	F7508	Complete Genome
GCF_013167695.1	PRJNA224116	SAMN05360162	83334	Escherichia coli O157:H7	F7386	Complete Genome
GCF_013167715.1	PRJNA224116	SAMN05360158	83334	Escherichia coli O157:H7	F7349	Complete Genome
GCF_013167735.1	PRJNA224116	SAMN05360149	83334	Escherichia coli O157:H7	F6667	Complete Genome
GCF_013167755.1	PRJNA224116	SAMN11229490	83334	Escherichia coli O157:H7	F6321	Complete Genome
GCF_013167775.1	PRJNA224116	SAMN11229489	83334	Escherichia coli O157:H7	F6294	Complete Genome
GCF_013167795.1	PRJNA224116	SAMN11229488	83334	Escherichia coli O157:H7	F3113	Complete Genome
GCF_013167815.1	PRJNA224116	SAMN11229487	83334	Escherichia coli O157:H7	F1273	Complete Genome
GCF_013167875.1	PRJNA224116	SAMN11229498	83334	Escherichia coli O157:H7	E32511	Complete Genome
GCF_013167935.1	PRJNA224116	SAMN11229486	83334	Escherichia coli O157:H7	DEC5E	Complete Genome
GCF_013167975.1	PRJNA224116	SAMN11229485	83334	Escherichia coli O157:H7	DEC5D	Complete Genome
GCF_013167995.1	PRJNA224116	SAMN11229484	83334	Escherichia coli O157:H7	DEC5B	Complete Genome
GCF_013168015.1	PRJNA224116	SAMN11229483	83334	Escherichia coli O157:H7	DEC5A	Complete Genome
GCF_013168035.1	PRJNA224116	SAMN11229482	83334	Escherichia coli O157:H7	DEC4E	Complete Genome
GCF_013168055.1	PRJNA224116	SAMN05360196	83334	Escherichia coli O157:H7	BB24-1	Complete Genome
GCF_013168075.1	PRJNA224116	SAMN11229481	83334	Escherichia coli O157:H7	ATCC 35150	Complete Genome
GCF_013168095.1	PRJNA224116	SAMN11229497	83334	Escherichia coli O157:H7	86-24	Complete Genome
GCF_013168115.1	PRJNA224116	SAMN11229500	83334	Escherichia coli O157:H7	493/89	Complete Genome
GCF_013168135.1	PRJNA224116	SAMN05360191	83334	Escherichia coli O157:H7	17B6-2	Complete Genome
GCF_013168155.1	PRJNA224116	SAMN05360204	83334	Escherichia coli O157:H7	2003-05-01	Complete Genome
GCF_013168175.1	PRJNA224116	SAMN05360202	83334	Escherichia coli O157:H7	2002-06-02	Complete Genome
GCF_013168195.1	PRJNA224116	SAMN11229480	83334	Escherichia coli O157:H7	7636	Complete Genome
GCF_013168215.1	PRJNA224116	SAMN11229479	83334	Escherichia coli O157:H7	7409	Complete Genome
GCF_013168235.1	PRJNA224116	SAMN11229478	83334	Escherichia coli O157:H7	2571	Complete Genome
GCF_013168255.1	PRJNA224116	SAMN11229477	83334	Escherichia coli O157:H7	611	Complete Genome
GCF_013201175.1	PRJNA224116	SAMN14944006	562	Escherichia coli	CP131_Sichuan	Complete Genome
GCF_013201195.1	PRJNA224116	SAMN14944005	562	Escherichia coli	CP66-6_Sichuan	Complete Genome
GCF_013201215.1	PRJNA224116	SAMN14944004	562	Escherichia coli	CP61_Sichuan	Complete Genome
GCF_013201235.1	PRJNA224116	SAMN14944002	562	Escherichia coli	CP8-3_Sichuan	Complete Genome
GCF_013201255.1	PRJNA224116	SAMN14944003	562	Escherichia coli	CP55_Sichuan	Complete Genome
GCF_013201505.1	PRJNA224116	SAMEA6471229	562	Escherichia coli		Complete Genome
GCF_013201525.1	PRJNA224116	SAMEA6471236	562	Escherichia coli		Complete Genome
GCF_013282195.1	PRJNA224116	SAMN13545722	562	Escherichia coli	NMBU_ W06E18	Complete Genome
GCF_013282275.1	PRJNA224116	SAMN12560240	562	Escherichia coli	NMBU_W05E18	Complete Genome
GCF_013282315.1	PRJNA224116	SAMN12565117	2603836	Escherichia coli O10:H32	NMBU-W12E19	Complete Genome
GCF_013282335.1	PRJNA224116	SAMN12640810	562	Escherichia coli	NMBU-W13E19	Complete Genome
GCF_013282355.1	PRJNA224116	SAMN12838293	562	Escherichia coli	NMBU-W10C18	Complete Genome
GCF_013305705.1	PRJNA224116	SAMN13412318	562	Escherichia coli	ampC_0069	Complete Genome
GCF_013315675.1	PRJNA224116	SAMN14943547	562	Escherichia coli	SCU-176	Complete Genome
GCF_013315695.1	PRJNA224116	SAMN14943545	562	Escherichia coli	SCU-172	Complete Genome
GCF_013315715.1	PRJNA224116	SAMN14943544	562	Escherichia coli	SCU-171	Complete Genome
GCF_013315735.1	PRJNA224116	SAMN14943543	562	Escherichia coli	SCU-115	Complete Genome
GCF_013315755.1	PRJNA224116	SAMN14943536	562	Escherichia coli	SCU-316	Complete Genome
GCF_013315975.1	PRJNA224116	SAMN14609777	562	Escherichia coli	SCU-113	Complete Genome
GCF_013315995.1	PRJNA224116	SAMN14609769	562	Escherichia coli	SCU-104	Complete Genome
GCF_013317085.1	PRJNA224116	SAMN13155539	562	Escherichia coli	MS6193	Complete Genome
GCF_013340785.1	PRJNA224116	SAMD00172786	562	Escherichia coli	TUM18530	Complete Genome
GCF_013340805.1	PRJNA224116	SAMD00172787	562	Escherichia coli	TUM18780	Complete Genome
GCF_013340825.1	PRJNA224116	SAMD00172788	562	Escherichia coli	TUM18781	Complete Genome
GCF_013342925.1	PRJNA224116	SAMN15150880	562	Escherichia coli	LWY24	Complete Genome
GCF_013343595.1	PRJNA224116	SAMN05360216	83334	Escherichia coli O157:H7	MB41-1	Complete Genome
GCF_013343615.1	PRJNA224116	SAMN11229503	83334	Escherichia coli O157:H7	USDA5905	Complete Genome
GCF_013343635.1	PRJNA224116	SAMN05360217	83334	Escherichia coli O157:H7	MB9-1	Complete Genome
GCF_013357345.1	PRJNA224116	SAMN13155204	562	Escherichia coli	MS6192	Complete Genome
GCF_013357365.1	PRJNA224116	SAMN14449600	562	Escherichia coli	RM13322	Complete Genome
GCF_013371685.1	PRJNA224116	SAMN15229441	562	Escherichia coli	AH01	Complete Genome
GCF_013371725.1	PRJNA224116	SAMN15229442	562	Escherichia coli	AH25	Complete Genome
GCF_013371745.1	PRJNA224116	SAMN15229443	562	Escherichia coli	AH62	Complete Genome
GCF_013372305.1	PRJNA224116	SAMN15075998	562	Escherichia coli	EcPF40	Complete Genome
GCF_013372325.1	PRJNA224116	SAMN15075997	562	Escherichia coli	EcPF18	Complete Genome
GCF_013372345.1	PRJNA224116	SAMN15075996	562	Escherichia coli	EcPF16	Complete Genome
GCF_013372365.1	PRJNA224116	SAMN15075995	562	Escherichia coli	EcPF15	Complete Genome
GCF_013372385.1	PRJNA224116	SAMN15075994	562	Escherichia coli	EcPF14	Complete Genome
GCF_013372405.1	PRJNA224116	SAMN15075993	562	Escherichia coli	EcPF7	Complete Genome
GCF_013372425.1	PRJNA224116	SAMN15075992	562	Escherichia coli	EcPF5	Complete Genome
GCF_013374235.1	PRJNA224116	SAMD00099774	562	Escherichia coli	M505	Complete Genome
GCF_013374255.1	PRJNA224116	SAMD00157542	562	Escherichia coli	YJ1	Complete Genome
GCF_013374275.1	PRJNA224116	SAMD00157544	562	Escherichia coli	YJ3	Complete Genome
GCF_013374295.1	PRJNA224116	SAMD00157545	562	Escherichia coli	YJ4	Complete Genome
GCF_013374315.1	PRJNA224116	SAMD00157547	562	Escherichia coli	YJ6	Complete Genome
GCF_013374335.1	PRJNA224116	SAMD00157562	562	Escherichia coli	F070	Complete Genome
GCF_013376515.1	PRJNA224116	SAMN14548319	562	Escherichia coli	17MR471	Complete Genome
GCF_013376575.1	PRJNA224116	SAMN14351533	562	Escherichia coli	ARL09/232	Complete Genome
GCF_013376895.1	PRJNA224116	SAMN04917416	562	Escherichia coli	357900	Complete Genome
GCF_013388275.1	PRJNA224116	SAMN15348021	562	Escherichia coli	550	Complete Genome
GCF_013389615.1	PRJNA224116	SAMN15394023	562	Escherichia coli	AMSCJX04	Complete Genome
GCF_013389695.1	PRJNA224116	SAMN15229516	562	Escherichia coli	AH65	Complete Genome
GCF_013390265.1	PRJNA224116	SAMN14840032	562	Escherichia coli	M1/5	Complete Genome
GCF_013391825.1	PRJNA224116	SAMN15394022	562	Escherichia coli	AMSCJX03	Complete Genome
GCF_013393825.1	PRJNA224116	SAMN11547014	562	Escherichia coli	FT130	Complete Genome
GCF_013394575.1	PRJNA224116	SAMN14823672	562	Escherichia coli	K56-43-un	Complete Genome
GCF_013402855.1	PRJNA224116	SAMN15402835	562	Escherichia coli	EC2	Complete Genome
GCF_013402895.1	PRJNA224116	SAMN15410927	562	Escherichia coli	EC1	Complete Genome
GCF_013423805.1	PRJNA224116	SAMN15500044	562	Escherichia coli	SY3626C5	Complete Genome
GCF_013425935.1	PRJNA224116	SAMN15499972	562	Escherichia coli	SY3626C1	Complete Genome
GCF_013425955.1	PRJNA224116	SAMN15502380	562	Escherichia coli	2D	Complete Genome
GCF_013426075.1	PRJNA224116	SAMN08932748	562	Escherichia coli	WCHEC035123	Complete Genome
GCF_013426095.1	PRJNA224116	SAMN09202771	562	Escherichia coli	WCHEC035125	Complete Genome
GCF_013426115.1	PRJNA224116	SAMN15447143	562	Escherichia coli	5008	Complete Genome
GCF_013459015.1	PRJNA224116	SAMN14966948	562	Escherichia coli	CE1803A	Complete Genome
GCF_013459175.1	PRJNA224116	SAMN14966947	562	Escherichia coli	CE1628	Complete Genome
GCF_013694285.1	PRJNA224116	SAMN15548965	562	Escherichia coli	1506	Complete Genome
GCF_013694325.1	PRJNA224116	SAMN15566562	562	Escherichia coli	C9	Complete Genome
GCF_013694345.1	PRJNA224116	SAMN15543098	562	Escherichia coli	SY3626_hybrid	Complete Genome
GCF_013694465.1	PRJNA224116	SAMN15566561	562	Escherichia coli	C7	Complete Genome
GCF_014058445.1	PRJNA224116	SAMN15423745	562	Escherichia coli	MBT-5	Complete Genome
GCF_014075475.1	PRJNA224116	SAMN14278031	562	Escherichia coli	1974-02-01	Complete Genome
GCF_014075595.1	PRJNA224116	SAMN14278030	562	Escherichia coli	1963-02-01	Complete Genome
GCF_014075795.1	PRJNA224116	SAMN14278029	562	Escherichia coli	1958-03-01	Complete Genome
GCF_014075915.1	PRJNA224116	SAMN14278028	562	Escherichia coli	1933-06-01	Complete Genome
GCF_014117345.1	PRJNA224116	SAMN13901561	562	Escherichia coli	E2348/69	Complete Genome
GCF_014117405.1	PRJNA224116	SAMN15595090	562	Escherichia coli	BUCT2930	Complete Genome
GCF_014157395.1	PRJNA224116	SAMD00194359	562	Escherichia coli	WP2-W18-ESBL-10	Complete Genome
GCF_014160155.1	PRJNA224116	SAMD00194507	562	Escherichia coli	WP5-S17-ESBL-11	Complete Genome
GCF_014162235.1	PRJNA224116	SAMD00194600	562	Escherichia coli	WP8-S17-ESBL-08	Complete Genome
GCF_014168595.1	PRJNA224116	SAMD00194346	562	Escherichia coli	WP2-W18-CRE-03	Complete Genome
GCF_014168675.1	PRJNA224116	SAMD00194357	562	Escherichia coli	WP2-W18-ESBL-08	Complete Genome
GCF_014168735.1	PRJNA224116	SAMD00194371	562	Escherichia coli	WP2-S18-ESBL-07	Complete Genome
GCF_014168755.1	PRJNA224116	SAMD00194372	562	Escherichia coli	WP2-S18-ESBL-08	Complete Genome
GCF_014168775.1	PRJNA224116	SAMD00194405	562	Escherichia coli	WP3-W18-CRE-03	Complete Genome
GCF_014168835.1	PRJNA224116	SAMD00194413	562	Escherichia coli	WP3-W18-ESBL-07	Complete Genome
GCF_014168855.1	PRJNA224116	SAMD00194414	562	Escherichia coli	WP3-W18-ESBL-08	Complete Genome
GCF_014168935.1	PRJNA224116	SAMD00194426	562	Escherichia coli	WP3-S18-ESBL-07	Complete Genome
GCF_014168955.1	PRJNA224116	SAMD00194427	562	Escherichia coli	WP3-S18-ESBL-08	Complete Genome
GCF_014168975.1	PRJNA224116	SAMD00194428	562	Escherichia coli	WP3-S18-ESBL-09	Complete Genome
GCF_014169015.1	PRJNA224116	SAMD00194451	562	Escherichia coli	WP4-S17-ESBL-03	Complete Genome
GCF_014169035.1	PRJNA224116	SAMD00194455	562	Escherichia coli	WP4-S17-ESBL-08	Complete Genome
GCF_014169095.1	PRJNA224116	SAMD00194467	562	Escherichia coli	WP4-W18-ESBL-08	Complete Genome
GCF_014169115.1	PRJNA224116	SAMD00194468	562	Escherichia coli	WP4-W18-ESBL-09	Complete Genome
GCF_014169155.1	PRJNA224116	SAMD00194482	562	Escherichia coli	WP4-S18-ESBL-08	Complete Genome
GCF_014169175.1	PRJNA224116	SAMD00194483	562	Escherichia coli	WP4-S18-ESBL-09	Complete Genome
GCF_014169195.1	PRJNA224116	SAMD00194506	562	Escherichia coli	WP5-S17-ESBL-10	Complete Genome
GCF_014169275.1	PRJNA224116	SAMD00194523	562	Escherichia coli	WP5-W18-ESBL-11	Complete Genome
GCF_014169395.1	PRJNA224116	SAMD00194533	562	Escherichia coli	WP5-S18-ESBL-07	Complete Genome
GCF_014169435.1	PRJNA224116	SAMD00194535	562	Escherichia coli	WP5-S18-ESBL-09	Complete Genome
GCF_014169455.1	PRJNA224116	SAMD00194553	562	Escherichia coli	WP7-S17-ESBL-01	Complete Genome
GCF_014169475.1	PRJNA224116	SAMD00194555	562	Escherichia coli	WP7-S17-ESBL-04	Complete Genome
GCF_014169575.1	PRJNA224116	SAMD00194579	562	Escherichia coli	WP7-S18-ESBL-09	Complete Genome
GCF_014169595.1	PRJNA224116	SAMD00194597	562	Escherichia coli	WP8-S17-ESBL-05	Complete Genome
GCF_014169615.1	PRJNA224116	SAMD00194604	562	Escherichia coli	WP8-S17-ESBL-12	Complete Genome
GCF_014169695.1	PRJNA224116	SAMD00194621	562	Escherichia coli	WP8-S18-CRE-02	Complete Genome
GCF_014169775.1	PRJNA224116	SAMD00194629	562	Escherichia coli	WP8-S18-ESBL-07	Complete Genome
GCF_014169855.1	PRJNA224116	SAMD00194670	562	Escherichia coli	WP9-S17-ESBL-11	Complete Genome
GCF_014169895.1	PRJNA224116	SAMD00194704	562	Escherichia coli	BEC1-S17-ESBL-07	Complete Genome
GCF_014169915.1	PRJNA224116	SAMD00194706	562	Escherichia coli	BEC1-S17-ESBL-09	Complete Genome
GCF_014169995.1	PRJNA224116	SAMN15086849	562	Escherichia coli	IDR1900005638-01-02	Complete Genome
GCF_014170615.1	PRJNA224116	SAMN13613900	562	Escherichia coli	181.1	Complete Genome
GCF_014170675.1	PRJNA224116	SAMN13613898	562	Escherichia coli	64.1	Complete Genome
GCF_014170975.1	PRJNA224116	SAMN13613889	562	Escherichia coli	268.2	Complete Genome
GCF_014171015.1	PRJNA224116	SAMD00194481	562	Escherichia coli	WP4-S18-ESBL-07	Complete Genome
GCF_014189395.1	PRJNA224116	SAMN11506046	562	Escherichia coli	N18-04097	Complete Genome
GCF_014217135.1	PRJNA224116	SAMN14594835	941322	Escherichia coli O25b:H4-ST131	2019_APHA	Complete Genome
GCF_014217155.1	PRJNA224116	SAMN14594834	941322	Escherichia coli O25b:H4-ST131	2017_APHA	Complete Genome
GCF_900092615.1	PRJNA224116	SAMEA3988096	562	Escherichia coli		Complete Genome
GCF_900096795.1	PRJNA224116	SAMEA4444104	562	Escherichia coli		Complete Genome
GCF_900096845.1	PRJNA224116	SAMEA4444107	562	Escherichia coli		Complete Genome
GCF_900149875.1	PRJNA224116	SAMEA35194168	168807	Escherichia coli O127:H6		Complete Genome
GCF_900149915.1	PRJNA224116	SAMEA35192668	168807	Escherichia coli O127:H6		Complete Genome
GCF_900174625.1	PRJNA224116	SAMEA19195168	562	Escherichia coli		Complete Genome
GCF_900174635.1	PRJNA224116	SAMEA19195918	562	Escherichia coli		Complete Genome
GCF_900184875.1	PRJNA224116	SAMEA104093909	562	Escherichia coli		Complete Genome
GCF_900186905.1	PRJNA224116	SAMEA4364219	562	Escherichia coli	NCTC122	Complete Genome
GCF_900474445.1	PRJNA224116	SAMEA3451135	562	Escherichia coli	NCTC9966	Complete Genome
GCF_900474495.1	PRJNA224116	SAMEA3368272	562	Escherichia coli	NCTC11023	Complete Genome
GCF_900474625.1	PRJNA224116	SAMEA3468857	562	Escherichia coli	NCTC9967	Complete Genome
GCF_900497095.1	PRJNA224116	SAMEA4785258	562	Escherichia coli		Complete Genome
GCF_900497415.1	PRJNA224116	SAMEA4786450	562	Escherichia coli		Complete Genome
GCF_900497455.1	PRJNA224116	SAMEA4786452	562	Escherichia coli		Complete Genome
GCF_900497485.1	PRJNA224116	SAMEA4786454	562	Escherichia coli		Complete Genome
GCF_900520285.1	PRJNA224116	SAMEA4830525	562	Escherichia coli		Complete Genome
GCF_900520305.1	PRJNA224116	SAMEA4830523	562	Escherichia coli		Complete Genome
GCF_900520325.1	PRJNA224116	SAMEA4830524	562	Escherichia coli		Complete Genome
GCF_900520345.1	PRJNA224116	SAMEA4830820	562	Escherichia coli		Complete Genome
GCF_900520365.1	PRJNA224116	SAMEA4830526	562	Escherichia coli		Complete Genome
GCF_900520385.1	PRJNA224116	SAMEA4830819	562	Escherichia coli		Complete Genome
GCF_900520395.1	PRJNA224116	SAMEA4830527	562	Escherichia coli		Complete Genome
GCF_900618295.1	PRJNA224116	SAMEA4916090	562	Escherichia coli		Complete Genome
GCF_900622635.1	PRJNA224116	SAMEA5128441	562	Escherichia coli	B36	Complete Genome
GCF_900622655.1	PRJNA224116	SAMEA5128442	562	Escherichia coli	MS14385	Complete Genome
GCF_900622665.1	PRJNA224116	SAMEA5128443	562	Escherichia coli	MS14386	Complete Genome
GCF_900622685.1	PRJNA224116	SAMEA5128445	562	Escherichia coli	MS14387	Complete Genome
GCF_900622695.1	PRJNA224116	SAMEA5128444	562	Escherichia coli	MS14384	Complete Genome
GCF_900635145.1	PRJNA224116	SAMEA3376909	562	Escherichia coli	NCTC9066	Complete Genome
GCF_900635165.1	PRJNA224116	SAMEA3376930	562	Escherichia coli	NCTC11151	Complete Genome
GCF_900635175.1	PRJNA224116	SAMEA3403037	562	Escherichia coli	NCTC9084	Complete Genome
GCF_900635185.1	PRJNA224116	SAMEA3403050	562	Escherichia coli	NCTC9112	Complete Genome
GCF_900635195.1	PRJNA224116	SAMEA3403038	562	Escherichia coli	NCTC9085	Complete Genome
GCF_900635205.1	PRJNA224116	SAMEA3443763	562	Escherichia coli	NCTC9082	Complete Genome
GCF_900635215.1	PRJNA224116	SAMEA3468848	562	Escherichia coli	NCTC9038	Complete Genome
GCF_900635235.1	PRJNA224116	SAMEA3469451	562	Escherichia coli	NCTC12655	Complete Genome
GCF_900635325.1	PRJNA224116	SAMEA3529258	562	Escherichia coli	NCTC10444	Complete Genome
GCF_900635635.1	PRJNA224116	SAMEA2689768	562	Escherichia coli	NCTC9104	Complete Genome
GCF_900635895.1	PRJNA224116	SAMEA3251422	562	Escherichia coli	NCTC5934	Complete Genome
GCF_900636005.1	PRJNA224116	SAMEA3368289	562	Escherichia coli	NCTC11476	Complete Genome
GCF_900636045.1	PRJNA224116	SAMEA3376924	562	Escherichia coli	NCTC10973	Complete Genome
GCF_900636055.1	PRJNA224116	SAMEA3368339	562	Escherichia coli	NCTC11121	Complete Genome
GCF_900636065.1	PRJNA224116	SAMEA3376928	562	Escherichia coli	NCTC11113	Complete Genome
GCF_900636075.1	PRJNA224116	SAMEA3376927	562	Escherichia coli	NCTC11129	Complete Genome
GCF_900636105.1	PRJNA224116	SAMEA3403040	562	Escherichia coli	NCTC9088	Complete Genome
GCF_900636115.1	PRJNA224116	SAMEA3403047	562	Escherichia coli	NCTC9102	Complete Genome
GCF_900636125.1	PRJNA224116	SAMEA3403043	562	Escherichia coli	NCTC9699	Complete Genome
GCF_900636145.1	PRJNA224116	SAMEA3443772	562	Escherichia coli	NCTC9087	Complete Genome
GCF_900636175.1	PRJNA224116	SAMEA3446331	562	Escherichia coli	NCTC8623	Complete Genome
GCF_900636195.1	PRJNA224116	SAMEA3443760	562	Escherichia coli	NCTC9008	Complete Genome
GCF_900636215.1	PRJNA224116	SAMEA3446350	562	Escherichia coli	NCTC9022	Complete Genome
GCF_900636235.1	PRJNA224116	SAMEA3451123	562	Escherichia coli	NCTC9100	Complete Genome
GCF_900636245.1	PRJNA224116	SAMEA3451127	562	Escherichia coli	NCTC9107	Complete Genome
GCF_900636295.1	PRJNA224116	SAMEA3505365	562	Escherichia coli	NCTC9040	Complete Genome
GCF_900636305.1	PRJNA224116	SAMEA3492660	562	Escherichia coli	NCTC10537	Complete Genome
GCF_900636595.1	PRJNA224116	SAMEA3672879	562	Escherichia coli	NCTC9080	Complete Genome
GCF_900636605.1	PRJNA224116	SAMEA3672878	562	Escherichia coli	NCTC9041	Complete Genome
GCF_900636785.1	PRJNA224116	SAMEA3867446	562	Escherichia coli	NCTC9113	Complete Genome
GCF_900636795.1	PRJNA224116	SAMEA3861969	562	Escherichia coli	NCTC9064	Complete Genome
GCF_900699165.1	PRJNA224116	SAMEA3446340	562	Escherichia coli	NCTC86	Complete Genome
GCF_900747775.1	PRJNA224116	SAMEA4682258	562	Escherichia coli		Complete Genome
GCF_900747785.1	PRJNA224116	SAMEA4682257	562	Escherichia coli		Complete Genome
GCF_901733115.1	PRJNA224116	SAMEA4732083	562	Escherichia coli		Complete Genome
GCF_902703415.1	PRJNA224116	SAMEA6109570	562	Escherichia coli	BEN5202	Complete Genome
GCF_902705295.1	PRJNA224116	SAMEA6109568	562	Escherichia coli	BEN2908	Complete Genome
GCF_902810275.1	PRJNA224116	SAMEA6595219	562	Escherichia coli		Complete Genome
GCF_902810285.1	PRJNA224116	SAMEA6595213	562	Escherichia coli		Complete Genome
GCF_902810295.1	PRJNA224116	SAMEA6595214	562	Escherichia coli		Complete Genome
GCF_902810305.1	PRJNA224116	SAMEA6595206	562	Escherichia coli		Complete Genome
GCF_902810315.1	PRJNA224116	SAMEA6595225	562	Escherichia coli		Complete Genome
GCF_902810325.1	PRJNA224116	SAMEA6595220	562	Escherichia coli		Complete Genome
GCF_902810335.1	PRJNA224116	SAMEA6595217	562	Escherichia coli		Complete Genome
GCF_902810345.1	PRJNA224116	SAMEA6595233	562	Escherichia coli		Complete Genome
GCF_902810365.1	PRJNA224116	SAMEA6595246	562	Escherichia coli		Complete Genome
GCF_902810375.1	PRJNA224116	SAMEA6595248	562	Escherichia coli		Complete Genome
GCF_902810385.1	PRJNA224116	SAMEA6595241	562	Escherichia coli		Complete Genome
GCF_902810395.1	PRJNA224116	SAMEA6595243	562	Escherichia coli		Complete Genome
GCF_902810405.1	PRJNA224116	SAMEA6595245	562	Escherichia coli		Complete Genome
GCF_902810415.1	PRJNA224116	SAMEA6595242	562	Escherichia coli		Complete Genome
GCF_902825185.1	PRJNA224116	SAMEA6595235	562	Escherichia coli		Complete Genome
GCF_902825195.1	PRJNA224116	SAMEA6595239	562	Escherichia coli		Complete Genome
GCF_902825205.1	PRJNA224116	SAMEA6595238	562	Escherichia coli		Complete Genome
GCF_000026225.1	PRJNA224116	SAMEA3138228	585054	Escherichia fergusonii ATCC 35469	ATCC 35469T	Complete Genome
GCF_003944565.2	PRJNA224116	SAMN10531910	564	Escherichia fergusonii	EFCF056	Complete Genome
GCF_008064875.1	PRJNA224116	SAMN01916852	564	Escherichia fergusonii	ATCC 35473	Complete Genome
GCF_008064895.1	PRJNA224116	SAMN01916802	564	Escherichia fergusonii	ATCC 35471	Complete Genome
GCF_008064915.1	PRJNA224116	SAMN03734431	564	Escherichia fergusonii	ATCC 35470	Complete Genome
GCF_013171325.1	PRJNA224116	SAMN14604091	564	Escherichia fergusonii	HNCF11W	Complete Genome
GCF_013591455.1	PRJNA224116	SAMN15148431	564	Escherichia fergusonii	RHB41-C23	Complete Genome
GCF_013596835.1	PRJNA224116	SAMN15148269	564	Escherichia fergusonii	RHB28-C13	Complete Genome
GCF_013798785.1	PRJNA224116	SAMN15148442	564	Escherichia fergusonii	RHB42-C24	Complete Genome
GCF_013799825.1	PRJNA224116	SAMN15148437	564	Escherichia fergusonii	RHB42-C13	Complete Genome
GCF_013800985.1	PRJNA224116	SAMN15148432	564	Escherichia fergusonii	RHB42-C01	Complete Genome
GCF_013801425.1	PRJNA224116	SAMN15148429	564	Escherichia fergusonii	RHB41-C20	Complete Genome
GCF_013801845.1	PRJNA224116	SAMN15148427	564	Escherichia fergusonii	RHB41-C15	Complete Genome
GCF_013812875.1	PRJNA224116	SAMN15148383	564	Escherichia fergusonii	RHB38-C01	Complete Genome
GCF_013813205.1	PRJNA224116	SAMN15148386	564	Escherichia fergusonii	RHB38-C07	Complete Genome
GCF_013813425.1	PRJNA224116	SAMN15148384	564	Escherichia fergusonii	RHB38-C04	Complete Genome
GCF_013819085.1	PRJNA224116	SAMN15148326	564	Escherichia fergusonii	RHB33-C07	Complete Genome
GCF_013819325.1	PRJNA224116	SAMN15148325	564	Escherichia fergusonii	RHB33-C04	Complete Genome
GCF_013819565.1	PRJNA224116	SAMN15148324	564	Escherichia fergusonii	RHB32-C22	Complete Genome
GCF_013820225.1	PRJNA224116	SAMN15148320	564	Escherichia fergusonii	RHB32-C16	Complete Genome
GCF_013820465.1	PRJNA224116	SAMN15148317	564	Escherichia fergusonii	RHB32-C09	Complete Genome
GCF_013820845.1	PRJNA224116	SAMN15148313	564	Escherichia fergusonii	RHB32-C05	Complete Genome
GCF_013821535.1	PRJNA224116	SAMN15148308	564	Escherichia fergusonii	RHB31-C17	Complete Genome
GCF_013822105.1	PRJNA224116	SAMN15148304	564	Escherichia fergusonii	RHB31-C13	Complete Genome
GCF_013825725.1	PRJNA224116	SAMN15148292	564	Escherichia fergusonii	RHB30-C07	Complete Genome
GCF_013829265.1	PRJNA224116	SAMN15148274	564	Escherichia fergusonii	RHB28-C21	Complete Genome
GCF_013834165.1	PRJNA224116	SAMN15148247	564	Escherichia fergusonii	RHB26-C09	Complete Genome
GCF_013834525.1	PRJNA224116	SAMN15148244	564	Escherichia fergusonii	RHB26-C03	Complete Genome
GCF_013836325.1	PRJNA224116	SAMN15148237	564	Escherichia fergusonii	RHB25-C10	Complete Genome
GCF_013838265.1	PRJNA224116	SAMN15148225	564	Escherichia fergusonii	RHB24-C08	Complete Genome
GCF_013838465.1	PRJNA224116	SAMN15148224	564	Escherichia fergusonii	RHB24-C06	Complete Genome
GCF_013886195.1	PRJNA224116	SAMN15148209	564	Escherichia fergusonii	RHB23-C02	Complete Genome
GCF_013886335.1	PRJNA224116	SAMN15148208	564	Escherichia fergusonii	RHB23-C01	Complete Genome
GCF_013892435.1	PRJNA224116	SAMN15148162	564	Escherichia fergusonii	RHB19-C05	Complete Genome
GCF_013893835.1	PRJNA224116	SAMN15148152	564	Escherichia fergusonii	RHB18-C04	Complete Genome
GCF_013894595.1	PRJNA224116	SAMN15148146	564	Escherichia fergusonii	RHB17-C11	Complete Genome
GCF_013899685.1	PRJNA224116	SAMN15148066	564	Escherichia fergusonii	RHB10-C23	Complete Genome
GCF_013899845.1	PRJNA224116	SAMN15148055	564	Escherichia fergusonii	RHB10-C04	Complete Genome
GCF_013923185.1	PRJNA224116	SAMN15147971	564	Escherichia fergusonii	RHB02-C22	Complete Genome
GCF_000512125.1	PRJNA224116	SAMN02641387	1440052	Escherichia albertii KF1	KF1	Complete Genome
GCF_001549955.1	PRJNA224116	SAMD00026637	208962	Escherichia albertii	EC06-170	Complete Genome
GCF_002285455.1	PRJNA224116	SAMD00026650	208962	Escherichia albertii	NIAH_Bird_3	Complete Genome
GCF_002285475.1	PRJNA224116	SAMD00026629	208962	Escherichia albertii	CB9786	Complete Genome
GCF_002741375.1	PRJNA224116	SAMN07159041	208962	Escherichia albertii	2014C-4356	Complete Genome
GCF_002872455.1	PRJNA224116	SAMN08242133	208962	Escherichia albertii	ChinaSP140150	Complete Genome
GCF_002895205.1	PRJNA224116	SAMN08159313	208962	Escherichia albertii	1551-2	Complete Genome
GCF_003312485.2	PRJNA224116	SAMN08199278	208962	Escherichia albertii	05-3106	Complete Genome
GCF_003312525.2	PRJNA224116	SAMN04498560	208962	Escherichia albertii	2012EL-1823B	Complete Genome
GCF_003312545.2	PRJNA224116	SAMN08172567	208962	Escherichia albertii	2013C-4143	Complete Genome
GCF_003316815.1	PRJNA224116	SAMN07159045	208962	Escherichia albertii	07-3866	Complete Genome
GCF_003860365.1	PRJNA224116	SAMN07169274	208962	Escherichia albertii	06-3542	Complete Genome
GCF_003860385.1	PRJNA224116	SAMN04505646	208962	Escherichia albertii	2014C-4015	Complete Genome
GCF_003864095.1	PRJNA224116	SAMN09534374	208962	Escherichia albertii	NCTC 9362	Complete Genome
GCF_002900365.1	PRJNA224116	SAMN08361671	1499973	Escherichia marmotae	HT073016	Complete Genome
GCF_013636045.1	PRJNA224116	SAMN15148435	1499973	Escherichia marmotae	RHB42-C09	Complete Genome
GCF_013636235.1	PRJNA224116	SAMN15148229	1499973	Escherichia marmotae	RHB24-C12	Complete Genome
GCF_013732895.1	PRJNA224116	SAMN15148701	1499973	Escherichia marmotae	RHBSTW-00814	Complete Genome
GCF_013745515.1	PRJNA224116	SAMN15148693	1499973	Escherichia marmotae	RHBSTW-00777	Complete Genome
GCF_013746655.1	PRJNA224116	SAMN15148663	1499973	Escherichia marmotae	RHBSTW-00605	Complete Genome
GCF_005843885.1	PRJNA224116	SAMN07759781	2044467	Escherichia sp. E4742	E4742	Complete Genome
GCF_012584495.1	PRJNA224116	SAMN14573117	2725997	Escherichia sp. SCLE84	SCLE84	Complete Genome
GCF_002117425.1	PRJNA224116	SAMN05982163	1744	Propionibacterium freudenreichii	P.UF1	Complete Genome
GCF_003330925.1	PRJNA224116	SAMN09443940	1744	Propionibacterium freudenreichii	CB129slpB	Complete Genome
GCF_013205725.1	PRJNA224116	SAMN14943796	1744	Propionibacterium freudenreichii	FAM 14217	Complete Genome
GCF_900086895.1	PRJNA224116	SAMEA3987120	1744	Propionibacterium freudenreichii		Complete Genome
GCF_900086925.1	PRJNA224116	SAMEA3987109	1744	Propionibacterium freudenreichii		Complete Genome
GCF_900087025.1	PRJNA224116	SAMEA3987076	1744	Propionibacterium freudenreichii		Complete Genome
GCF_900087165.1	PRJNA224116	SAMEA3988333	1744	Propionibacterium freudenreichii		Complete Genome
GCF_900087185.1	PRJNA224116	SAMEA3988335	1744	Propionibacterium freudenreichii		Complete Genome
GCF_900087375.1	PRJNA224116	SAMEA3991702	1744	Propionibacterium freudenreichii		Complete Genome
GCF_900087655.1	PRJNA224116	SAMEA3991644	1744	Propionibacterium freudenreichii		Complete Genome
GCF_900092755.1	PRJNA224116	SAMEA4076646	1744	Propionibacterium freudenreichii		Complete Genome
GCF_900095075.1	PRJNA224116	SAMEA4360960	1744	Propionibacterium freudenreichii		Complete Genome
GCF_900097245.1	PRJNA224116	SAMEA4467440	1744	Propionibacterium freudenreichii		Complete Genome
GCF_900097255.1	PRJNA224116	SAMEA4467426	1744	Propionibacterium freudenreichii		Complete Genome
GCF_902386715.1	PRJNA224116	SAMEA5851905	1744	Propionibacterium freudenreichii		Complete Genome
GCF_900016155.1	PRJNA224116	SAMEA3716040	1744	Propionibacterium freudenreichii subsp. shermanii		Complete Genome
GCF_000940845.1	PRJNA224116	SAMN03263638	1744	Propionibacterium freudenreichii subsp. freudenreichii	20271T	Complete Genome
GCF_900637915.1	PRJNA224116	SAMEA48419668	119981	Propionibacterium australiense	NCTC13651	Complete Genome
GCF_003798325.1	PRJNA224116	SAMN10228556	556499	Propionibacterium acidifaciens	FDAARGOS_576	Complete Genome
GCF_000091725.1	PRJNA224116	SAMEA2272304	1744	Propionibacterium freudenreichii subsp. shermanii CIRM-BIA1	CIRM-B1AI	Complete Genome
GCF_000685665.1	PRJNA224116	SAMN02736809	210	Helicobacter pylori	BM013A	Complete Genome
GCF_000685705.1	PRJNA224116	SAMN02736818	210	Helicobacter pylori	BM012B	Complete Genome
GCF_000685745.1	PRJNA224116	SAMN02736816	210	Helicobacter pylori	BM013B	Complete Genome
GCF_000817025.1	PRJNA224116	SAMN03154060	210	Helicobacter pylori	Hp238	Complete Genome
GCF_000827025.1	PRJNA224116	SAMN03268365	210	Helicobacter pylori	26695-1MET	Complete Genome
GCF_001433515.1	PRJNA224116	SAMN03144736	210	Helicobacter pylori	7C	Complete Genome
GCF_001653375.1	PRJNA224116	SAMN02731779	210	Helicobacter pylori	L7	Complete Genome
GCF_001653395.1	PRJNA224116	SAMN02731778	210	Helicobacter pylori	DU15	Complete Genome
GCF_001653415.1	PRJNA224116	SAMN02731783	210	Helicobacter pylori	CC33C	Complete Genome
GCF_001653435.1	PRJNA224116	SAMN02731780	210	Helicobacter pylori	ausabrJ05	Complete Genome
GCF_001653455.1	PRJNA224116	SAMN02731784	210	Helicobacter pylori	K26A1	Complete Genome
GCF_001653475.1	PRJNA224116	SAMN02731781	210	Helicobacter pylori	PNG84A	Complete Genome
GCF_002222575.1	PRJNA224116	SAMN07338981	210	Helicobacter pylori	G272	Complete Genome
GCF_002906495.1	PRJNA224116	SAMN08388634	210	Helicobacter pylori	dRdM1	Complete Genome
GCF_002906535.1	PRJNA224116	SAMN08388633	210	Helicobacter pylori	26695-dR	Complete Genome
GCF_002906555.1	PRJNA224116	SAMN08388635	210	Helicobacter pylori	26695-dRdM2	Complete Genome
GCF_002951975.1	PRJNA224116	SAMN06216064	210	Helicobacter pylori	B128_1	Complete Genome
GCF_002952455.1	PRJNA224116	SAMN06216085	210	Helicobacter pylori	7.13_D3a	Complete Genome
GCF_002952475.1	PRJNA224116	SAMN06216086	210	Helicobacter pylori	7.13_D3b	Complete Genome
GCF_002952495.1	PRJNA224116	SAMN06216087	210	Helicobacter pylori	7.13_D3c	Complete Genome
GCF_002952515.1	PRJNA224116	SAMN06216078	210	Helicobacter pylori	7.13_R3c	Complete Genome
GCF_002952535.1	PRJNA224116	SAMN06216077	210	Helicobacter pylori	7.13_R3b	Complete Genome
GCF_002952555.1	PRJNA224116	SAMN06216075	210	Helicobacter pylori	7.13_R2c	Complete Genome
GCF_002952575.1	PRJNA224116	SAMN06216073	210	Helicobacter pylori	7.13_R2a	Complete Genome
GCF_002952595.1	PRJNA224116	SAMN06216072	210	Helicobacter pylori	7.13_R1c	Complete Genome
GCF_002952615.1	PRJNA224116	SAMN06216076	210	Helicobacter pylori	7.13_R3a	Complete Genome
GCF_002952635.1	PRJNA224116	SAMN06216074	210	Helicobacter pylori	7.13_R2b	Complete Genome
GCF_002952655.1	PRJNA224116	SAMN06216071	210	Helicobacter pylori	7.13_R1b	Complete Genome
GCF_002952675.1	PRJNA224116	SAMN06216070	210	Helicobacter pylori	7.13_R1a	Complete Genome
GCF_002953555.1	PRJNA224116	SAMN08388637	210	Helicobacter pylori	dRdM2addM2	Complete Genome
GCF_002983705.1	PRJNA224116	SAMN06173313	210	Helicobacter pylori	FDAARGOS_300	Complete Genome
GCF_003050665.1	PRJNA224116	SAMN06173311	210	Helicobacter pylori	FDAARGOS_298	Complete Genome
GCF_003636855.2	PRJNA224116	SAMN06329538	210	Helicobacter pylori	HP14039	Complete Genome
GCF_003855475.1	PRJNA224116	SAMN10461767	210	Helicobacter pylori	Hpbs1	Complete Genome
GCF_003939085.1	PRJNA224116	SAMN10181238	210	Helicobacter pylori	HP42K	Complete Genome
GCF_003957395.1	PRJNA224116	SAMN08195713	210	Helicobacter pylori	H-137	Complete Genome
GCF_004088075.1	PRJNA224116	SAMN10663175	210	Helicobacter pylori	Hpbs3	Complete Genome
GCF_004088155.1	PRJNA224116	SAMN10663081	210	Helicobacter pylori	Hpbs2	Complete Genome
GCF_004295525.1	PRJNA224116	SAMD00051588	210	Helicobacter pylori	ATCC 43504	Complete Genome
GCF_004295545.1	PRJNA224116	SAMD00051589	210	Helicobacter pylori	PMSS1	Complete Genome
GCF_006337265.1	PRJNA224116	SAMN10053852	210	Helicobacter pylori	479-A2-EK4	Complete Genome
GCF_006337285.1	PRJNA224116	SAMN10053800	210	Helicobacter pylori	476-A2-EK2	Complete Genome
GCF_006337305.1	PRJNA224116	SAMN10053787	210	Helicobacter pylori	381-F-EK9	Complete Genome
GCF_006337325.1	PRJNA224116	SAMN10053769	210	Helicobacter pylori	381-C-EK1	Complete Genome
GCF_006337345.1	PRJNA224116	SAMN10053716	210	Helicobacter pylori	169-C-EK8	Complete Genome
GCF_006337365.1	PRJNA224116	SAMN10053600	210	Helicobacter pylori	25-A-EK9	Complete Genome
GCF_006337385.1	PRJNA224116	SAMN10053522	210	Helicobacter pylori	21-F-EK1	Complete Genome
GCF_006337405.1	PRJNA224116	SAMN10053452	210	Helicobacter pylori	19-C-EK1	Complete Genome
GCF_006337425.1	PRJNA224116	SAMN10053793	210	Helicobacter pylori	476-A-EK5	Complete Genome
GCF_006337445.1	PRJNA224116	SAMN10053762	210	Helicobacter pylori	381-A-EK4	Complete Genome
GCF_006337465.1	PRJNA224116	SAMN10053739	210	Helicobacter pylori	280-A-EK1	Complete Genome
GCF_006337485.1	PRJNA224116	SAMN10053719	210	Helicobacter pylori	173-A-EK1	Complete Genome
GCF_006337625.1	PRJNA224116	SAMN10053703	210	Helicobacter pylori	169-A-EK5	Complete Genome
GCF_006337745.1	PRJNA224116	SAMN10053622	210	Helicobacter pylori	26-A-EK1	Complete Genome
GCF_006337875.1	PRJNA224116	SAMN10053562	210	Helicobacter pylori	24-A-EK1	Complete Genome
GCF_006338045.1	PRJNA224116	SAMN10053532	210	Helicobacter pylori	23-A-EK1	Complete Genome
GCF_006338145.1	PRJNA224116	SAMN10053502	210	Helicobacter pylori	21-A-EK1	Complete Genome
GCF_006338285.1	PRJNA224116	SAMN10053472	210	Helicobacter pylori	20-A-EK1	Complete Genome
GCF_006338415.1	PRJNA224116	SAMN10053444	210	Helicobacter pylori	19-A-EK3	Complete Genome
GCF_006338545.1	PRJNA224116	SAMN10053419	210	Helicobacter pylori	13-A-EK8	Complete Genome
GCF_006338685.1	PRJNA224116	SAMN10053865	210	Helicobacter pylori	479-C2-EK2	Complete Genome
GCF_006338815.1	PRJNA224116	SAMN10053808	210	Helicobacter pylori	476-C-EK5	Complete Genome
GCF_006338945.1	PRJNA224116	SAMN10053855	210	Helicobacter pylori	479-C-EK2	Complete Genome
GCF_006339065.1	PRJNA224116	SAMN10053819	210	Helicobacter pylori	478-A-EK1	Complete Genome
GCF_006339235.1	PRJNA224116	SAMN10053592	210	Helicobacter pylori	25-A-EK1	Complete Genome
GCF_006339365.1	PRJNA224116	SAMN10053382	210	Helicobacter pylori	5-A-EK1	Complete Genome
GCF_007794935.1	PRJNA224116	SAMN10083778	210	Helicobacter pylori	B128 7.13	Complete Genome
GCF_007836735.1	PRJNA224116	SAMN08055031	210	Helicobacter pylori	B125A	Complete Genome
GCF_007836855.1	PRJNA224116	SAMN08055030	210	Helicobacter pylori	7.13	Complete Genome
GCF_007843535.1	PRJNA224116	SAMN08055037	210	Helicobacter pylori	B147	Complete Genome
GCF_007843715.1	PRJNA224116	SAMN08055036	210	Helicobacter pylori	J182	Complete Genome
GCF_007843915.1	PRJNA224116	SAMN08055035	210	Helicobacter pylori	B140	Complete Genome
GCF_007844035.1	PRJNA224116	SAMN08055034	210	Helicobacter pylori	B136A	Complete Genome
GCF_007844055.1	PRJNA224116	SAMN08055033	210	Helicobacter pylori	B130A	Complete Genome
GCF_008326525.1	PRJNA224116	SAMN02724990	210	Helicobacter pylori	TN2wt	Complete Genome
GCF_010917155.1	PRJNA224116	SAMN13950472	210	Helicobacter pylori	GCT 27	Complete Genome
GCF_010917555.1	PRJNA224116	SAMN13950473	210	Helicobacter pylori	GCT 43	Complete Genome
GCF_010917675.1	PRJNA224116	SAMN13950474	210	Helicobacter pylori	GCT 97	Complete Genome
GCF_011456275.1	PRJNA224116	SAMN10961649	210	Helicobacter pylori	H1	Complete Genome
GCF_011456295.1	PRJNA224116	SAMN10961648	210	Helicobacter pylori	125C7	Complete Genome
GCF_011456315.1	PRJNA224116	SAMN10961647	210	Helicobacter pylori	125A3	Complete Genome
GCF_011456475.1	PRJNA224116	SAMN10961646	210	Helicobacter pylori	119C10	Complete Genome
GCF_011456665.1	PRJNA224116	SAMN10961645	210	Helicobacter pylori	119A2	Complete Genome
GCF_011456895.1	PRJNA224116	SAMN10961644	210	Helicobacter pylori	103C8	Complete Genome
GCF_011457115.1	PRJNA224116	SAMN10961643	210	Helicobacter pylori	103A4	Complete Genome
GCF_011457355.1	PRJNA224116	SAMN10961642	210	Helicobacter pylori	87C7	Complete Genome
GCF_011457615.1	PRJNA224116	SAMN10961641	210	Helicobacter pylori	87A3	Complete Genome
GCF_011457815.1	PRJNA224116	SAMN10961640	210	Helicobacter pylori	81C9	Complete Genome
GCF_011458015.1	PRJNA224116	SAMN10961639	210	Helicobacter pylori	81A1	Complete Genome
GCF_011458095.1	PRJNA224116	SAMN10961638	210	Helicobacter pylori	78C8	Complete Genome
GCF_011458315.1	PRJNA224116	SAMN10961637	210	Helicobacter pylori	78A3	Complete Genome
GCF_011462215.1	PRJNA224116	SAMN10961636	210	Helicobacter pylori	48C8	Complete Genome
GCF_011462375.1	PRJNA224116	SAMN10961635	210	Helicobacter pylori	48A2	Complete Genome
GCF_011462575.1	PRJNA224116	SAMN10961634	210	Helicobacter pylori	29C8	Complete Genome
GCF_011462735.1	PRJNA224116	SAMN10961633	210	Helicobacter pylori	29A2	Complete Genome
GCF_011462915.1	PRJNA224116	SAMN10961632	210	Helicobacter pylori	12C8	Complete Genome
GCF_011463035.1	PRJNA224116	SAMN10961631	210	Helicobacter pylori	12A3	Complete Genome
GCF_011463055.1	PRJNA224116	SAMN10961630	210	Helicobacter pylori	8C10	Complete Genome
GCF_011463175.1	PRJNA224116	SAMN10961629	210	Helicobacter pylori	8A3	Complete Genome
GCF_013122035.1	PRJNA224116	SAMN14820694	210	Helicobacter pylori	HP9192	Complete Genome
GCF_013122055.1	PRJNA224116	SAMN14820693	210	Helicobacter pylori	HP1352	Complete Genome
GCF_013122115.1	PRJNA224116	SAMN14820692	210	Helicobacter pylori	HPY	Complete Genome
GCF_016747995.1	PRJNA224116	SAMN14589633	210	Helicobacter pylori	ASHA-001	Complete Genome
GCF_016748085.1	PRJNA224116	SAMN14589635	210	Helicobacter pylori	ASHA-002	Complete Genome
GCF_016748175.1	PRJNA224116	SAMN14589656	210	Helicobacter pylori	ASHA-003	Complete Genome
GCF_016748265.1	PRJNA224116	SAMN14592714	210	Helicobacter pylori	ASHA-004	Complete Genome
GCF_016748415.1	PRJNA224116	SAMN14592743	210	Helicobacter pylori	ASHA-005	Complete Genome
GCF_016748555.1	PRJNA224116	SAMN14593100	210	Helicobacter pylori	LIM-010	Complete Genome
GCF_016748675.1	PRJNA224116	SAMN14593099	210	Helicobacter pylori	LIM-009	Complete Genome
GCF_016748795.1	PRJNA224116	SAMN14593098	210	Helicobacter pylori	LIM-008	Complete Genome
GCF_016748925.1	PRJNA224116	SAMN14593097	210	Helicobacter pylori	LIM-007	Complete Genome
GCF_016749025.1	PRJNA224116	SAMN14593096	210	Helicobacter pylori	LIM-006	Complete Genome
GCF_016749085.1	PRJNA224116	SAMN14593095	210	Helicobacter pylori	LIM-005	Complete Genome
GCF_016749215.1	PRJNA224116	SAMN14593093	210	Helicobacter pylori	LIM-003	Complete Genome
GCF_016749335.1	PRJNA224116	SAMN14593091	210	Helicobacter pylori	LIM-001	Complete Genome
GCF_016749455.1	PRJNA224116	SAMN14593090	210	Helicobacter pylori	PUNO-010	Complete Genome
GCF_016749575.1	PRJNA224116	SAMN14593089	210	Helicobacter pylori	PUNO-009	Complete Genome
GCF_016749715.1	PRJNA224116	SAMN14593088	210	Helicobacter pylori	PUNO-008	Complete Genome
GCF_016749815.1	PRJNA224116	SAMN14593087	210	Helicobacter pylori	PUNO-007	Complete Genome
GCF_016755615.1	PRJNA224116	SAMN14593085	210	Helicobacter pylori	PUNO-004	Complete Genome
GCF_016755635.1	PRJNA224116	SAMN14593084	210	Helicobacter pylori	PUNO-003	Complete Genome
GCF_016755655.1	PRJNA224116	SAMN14593083	210	Helicobacter pylori	PUNO-002	Complete Genome
GCF_016755675.1	PRJNA224116	SAMN14593082	210	Helicobacter pylori	PUNO-001	Complete Genome
GCF_016755695.1	PRJNA224116	SAMN14593081	210	Helicobacter pylori	SHIM-014	Complete Genome
GCF_016755715.1	PRJNA224116	SAMN14593078	210	Helicobacter pylori	SHIM-007	Complete Genome
GCF_016755735.1	PRJNA224116	SAMN14593077	210	Helicobacter pylori	SHIM-002	Complete Genome
GCF_016755755.1	PRJNA224116	SAMN14593076	210	Helicobacter pylori	ASHA-010	Complete Genome
GCF_016755775.1	PRJNA224116	SAMN14593075	210	Helicobacter pylori	ASHA-009	Complete Genome
GCF_016755795.1	PRJNA224116	SAMN14593074	210	Helicobacter pylori	ASHA-008	Complete Genome
GCF_016755815.1	PRJNA224116	SAMN14593073	210	Helicobacter pylori	ASHA-006	Complete Genome
GCF_016757535.1	PRJNA224116	SAMN14593092	210	Helicobacter pylori	LIM-002	Complete Genome
GCF_016757555.1	PRJNA224116	SAMN14593086	210	Helicobacter pylori	PUNO-006	Complete Genome
GCF_016757575.1	PRJNA224116	SAMN14593080	210	Helicobacter pylori	SHIM-011	Complete Genome
GCF_016757595.1	PRJNA224116	SAMN14593079	210	Helicobacter pylori	SHIM-010	Complete Genome
GCF_017821235.1	PRJNA224116	SAMN18350106	210	Helicobacter pylori	MT5118	Complete Genome
GCF_017821275.1	PRJNA224116	SAMN18350156	210	Helicobacter pylori	MT5105	Complete Genome
GCF_017821355.1	PRJNA224116	SAMN18350180	210	Helicobacter pylori	MT5125	Complete Genome
GCF_017821475.1	PRJNA224116	SAMN18350188	210	Helicobacter pylori	MT5111	Complete Genome
GCF_017821535.1	PRJNA224116	SAMN18350190	210	Helicobacter pylori	MT5135	Complete Genome
GCF_017821595.1	PRJNA224116	SAMN18350230	210	Helicobacter pylori	MT5114	Complete Genome
GCF_017821615.1	PRJNA224116	SAMN18350231	210	Helicobacter pylori	MT5119	Complete Genome
GCF_017821635.1	PRJNA224116	SAMN18350270	210	Helicobacter pylori	MT5124	Complete Genome
GCF_017821655.1	PRJNA224116	SAMN18350271	210	Helicobacter pylori	MT5136	Complete Genome
GCF_019670505.1	PRJNA224116	SAMD00296812	210	Helicobacter pylori	3401	Complete Genome
GCF_019973855.1	PRJNA224116	SAMD00392799	210	Helicobacter pylori	#3	Complete Genome
GCF_019973875.1	PRJNA224116	SAMD00392800	210	Helicobacter pylori	#5	Complete Genome
GCF_019973995.1	PRJNA224116	SAMD00392801	210	Helicobacter pylori	#6	Complete Genome
GCF_019974055.1	PRJNA224116	SAMD00392802	210	Helicobacter pylori	#8	Complete Genome
GCF_020735525.1	PRJNA224116	SAMN22365130	210	Helicobacter pylori	FDAARGOS_1601	Complete Genome
GCF_020735805.1	PRJNA224116	SAMN22091660	210	Helicobacter pylori	FDAARGOS_1563	Complete Genome
GCF_020906585.1	PRJNA224116	SAMN22488069	210	Helicobacter pylori	3192	Complete Genome
GCF_900119955.1	PRJNA224116	SAMEA4554840	210	Helicobacter pylori	HE171/09	Complete Genome
GCF_900119995.1	PRJNA224116	SAMEA4554837	210	Helicobacter pylori	HE143/09	Complete Genome
GCF_900120055.1	PRJNA224116	SAMEA4554841	210	Helicobacter pylori	HE178/09	Complete Genome
GCF_900120135.1	PRJNA224116	SAMEA4554832	210	Helicobacter pylori	HE132/09	Complete Genome
GCF_900120185.1	PRJNA224116	SAMEA4554833	210	Helicobacter pylori	HE134/09	Complete Genome
GCF_900120205.1	PRJNA224116	SAMEA4554835	210	Helicobacter pylori	HE141/09	Complete Genome
GCF_900120225.1	PRJNA224116	SAMEA4554834	210	Helicobacter pylori	HE136/09	Complete Genome
GCF_900120255.1	PRJNA224116	SAMEA4554831	210	Helicobacter pylori	HE101/09	Complete Genome
GCF_900120275.1	PRJNA224116	SAMEA4554836	210	Helicobacter pylori	HE142/09	Complete Genome
GCF_900120315.1	PRJNA224116	SAMEA4554839	210	Helicobacter pylori	HE170/09	Complete Genome
GCF_900120335.1	PRJNA224116	SAMEA4554838	210	Helicobacter pylori	HE147/09	Complete Genome
GCF_900149805.1	PRJNA224116	SAMEA33005668	210	Helicobacter pylori	BCM-300	Complete Genome
GCF_900176185.1	PRJNA224116	SAMEA103957791	210	Helicobacter pylori	HE93/10_v1	Complete Genome
GCF_900638475.1	PRJNA224116	SAMEA104224776	210	Helicobacter pylori	NCTC13345	Complete Genome
GCF_900638505.1	PRJNA224116	SAMEA104224786	210	Helicobacter pylori	NCTC12823	Complete Genome
GCF_902381665.1	PRJNA224116	SAMEA5850860	210	Helicobacter pylori	MGYG-HGUT-01357	Complete Genome
GCF_003213725.2	PRJNA224116	SAMD00106671	213	Helicobacter cinaedi	P01D0000	Complete Genome
GCF_003213825.2	PRJNA224116	SAMD00106672	213	Helicobacter cinaedi	P03D0629	Complete Genome
GCF_003214155.2	PRJNA224116	SAMD00106675	213	Helicobacter cinaedi	P06D0798	Complete Genome
GCF_003574195.1	PRJNA224116	SAMD00047012	213	Helicobacter cinaedi	MRY08-1234	Complete Genome
GCF_014931095.1	PRJNA224116	SAMN15354345	213	Helicobacter cinaedi	D7095	Complete Genome
GCF_014931155.1	PRJNA224116	SAMN15354330	213	Helicobacter cinaedi	2017D-0197	Complete Genome
GCF_902381705.1	PRJNA224116	SAMEA5850935	213	Helicobacter cinaedi	MGYG-HGUT-01432	Complete Genome
GCF_900476215.1	PRJNA224116	SAMEA44549668	217	Helicobacter mustelae	NCTC12198	Complete Genome
GCF_900638355.1	PRJNA224116	SAMEA104210757	35818	Helicobacter pullorum	NCTC13154	Complete Genome
GCF_001999985.1	PRJNA224116	SAMN03485893	37372	Helicobacter bilis	AAQJH	Complete Genome
GCF_900638485.1	PRJNA224116	SAMEA104224780	45498	Helicobacter cholecystus	NCTC13205	Complete Genome
GCF_001460635.1	PRJNA224116	SAMEA3507300	76936	Helicobacter typhlonius	MIT 97-6810	Complete Genome
GCF_000008525.1	PRJNA224116	SAMN02603995	210	Helicobacter pylori 26695	26695	Complete Genome
GCF_000307795.1	PRJNA224116	SAMN02603761	210	Helicobacter pylori 26695	26695	Complete Genome
GCF_000008785.1	PRJNA224116	SAMN02602990	210	Helicobacter pylori J99	J99	Complete Genome
GCF_000982695.1	PRJNA224116	SAMN03487572	210	Helicobacter pylori J99	J99	Complete Genome
GCF_000270045.1	PRJNA224116	SAMD00060973	210	Helicobacter pylori F32	F32	Complete Genome
GCF_000685625.1	PRJNA224116	SAMN02736817	210	Helicobacter pylori J166	J166	Complete Genome
GCF_002005525.1	PRJNA224116	SAMN03331743	210	Helicobacter pylori SS1	SS1	Complete Genome
GCF_900478295.1	PRJNA224116	SAMEA3178013	210	Helicobacter pylori NCTC 11637 = CCUG 17874 = ATCC 43504	NCTC 11637	Complete Genome
GCF_007036205.1	PRJNA224116	SAMD00173587	104628	Helicobacter suis	SNTW101c	Complete Genome
GCF_013374155.1	PRJNA224116	SAMD00215134	104628	Helicobacter suis	NHP19-0020	Complete Genome
GCF_013374175.1	PRJNA224116	SAMD00215131	104628	Helicobacter suis	NHP19-4003	Complete Genome
GCF_013374195.1	PRJNA224116	SAMD00215132	104628	Helicobacter suis	NHP19-4004	Complete Genome
GCF_013374215.1	PRJNA224116	SAMD00215133	104628	Helicobacter suis	NHP19-4022	Complete Genome
GCF_003097575.1	PRJNA224116	SAMN07204495	135569	Helicobacter apodemus	SCJK1	Complete Genome
GCF_014931175.1	PRJNA224116	SAMN04545302	157268	Helicobacter winghamensis	2015D-0170	Complete Genome
GCF_000259255.1	PRJNA224116	SAMN02603199	138563	Helicobacter cetorum MIT 00-7128	MIT 00-7128	Complete Genome
GCF_001693335.1	PRJNA224116	SAMN05379701	222136	Helicobacter enhydrae	MIT 01-6242	Complete Genome
GCF_000007905.1	PRJNA224116	SAMN02604097	32025	Helicobacter hepaticus ATCC 51449	ATCC 51449	Complete Genome
GCF_000011725.1	PRJNA224116	SAMN02603300	210	Helicobacter pylori 51	51	Complete Genome
GCF_000013245.1	PRJNA224116	SAMN02604311	210	Helicobacter pylori HPAG1	HPAG1	Complete Genome
GCF_000009305.1	PRJNA224116	SAMEA3138199	212	Helicobacter acinonychis str. Sheeba	Sheeba	Complete Genome
GCF_000020245.1	PRJNA224116	SAMN02604319	210	Helicobacter pylori Shi470	Shi470	Complete Genome
GCF_000349975.1	PRJNA224116	SAMD00061010	213	Helicobacter cinaedi CCUG 18818 = ATCC BAA-847	ATCC BAA-847	Complete Genome
GCF_007844075.1	PRJNA224116	SAMN08055032	210	Helicobacter pylori B128	B128	Complete Genome
GCF_000021165.1	PRJNA224116	SAMN02604237	210	Helicobacter pylori G27	G27	Complete Genome
GCF_000021465.1	PRJNA224116	SAMN02603595	210	Helicobacter pylori P12	P12	Complete Genome
GCF_000178935.2	PRJNA224116	SAMN02299423	210	Helicobacter pylori 35A	35A	Complete Genome
GCF_000213135.1	PRJNA224116	SAMN00189522	210	Helicobacter pylori 83	83	Complete Genome
GCF_000091345.1	PRJNA224116	SAMEA3138296	210	Helicobacter pylori B38	B38	Complete Genome
GCF_000093185.1	PRJNA224116	SAMN00003101	210	Helicobacter pylori v225d	v225d	Complete Genome
GCF_000091985.1	PRJNA224116	SAMEA2272735	217	Helicobacter mustelae 12198	12198	Complete Genome
GCF_000023805.1	PRJNA224116	SAMN02603357	210	Helicobacter pylori 52	52	Complete Genome
GCF_000196755.1	PRJNA224116	SAMEA2272698	210	Helicobacter pylori B8	B8	Complete Genome
GCF_000148855.1	PRJNA224116	SAMN02603202	210	Helicobacter pylori SJM180	SJM180	Complete Genome
GCF_000148875.1	PRJNA224116	SAMN02603203	210	Helicobacter pylori PeCan4	PeCan4	Complete Genome
GCF_000148895.1	PRJNA224116	SAMN02603204	210	Helicobacter pylori Cuz20	Cuz20	Complete Genome
GCF_000148915.1	PRJNA224116	SAMN02603200	210	Helicobacter pylori Sat464	Sat464	Complete Genome
GCF_000270005.1	PRJNA224116	SAMD00060971	210	Helicobacter pylori F16	F16	Complete Genome
GCF_000270025.1	PRJNA224116	SAMD00060972	210	Helicobacter pylori F30	F30	Complete Genome
GCF_000270065.1	PRJNA224116	SAMD00060974	210	Helicobacter pylori F57	F57	Complete Genome
GCF_000185225.1	PRJNA224116	SAMN02603023	210	Helicobacter pylori Lithuania75	Lithuania75	Complete Genome
GCF_000185185.1	PRJNA224116	SAMN02603026	210	Helicobacter pylori India7	India7	Complete Genome
GCF_000185245.1	PRJNA224116	SAMN02603025	210	Helicobacter pylori SouthAfrica7	SouthAfrica7	Complete Genome
GCF_000185205.1	PRJNA224116	SAMN02603024	210	Helicobacter pylori Gambia94/24	Gambia94/24	Complete Genome
GCF_000200595.1	PRJNA224116	SAMEA2272759	214	Helicobacter felis ATCC 49179	ATCC 49179	Complete Genome
GCF_000255955.1	PRJNA224116	SAMN02604318	210	Helicobacter pylori ELS37	ELS37	Complete Genome
GCF_000224535.1	PRJNA224116	SAMN02604320	210	Helicobacter pylori Puno120	Puno120	Complete Genome
GCF_000224555.1	PRJNA224116	SAMN02604321	210	Helicobacter pylori Puno135	Puno135	Complete Genome
GCF_000224575.1	PRJNA224116	SAMN02604322	210	Helicobacter pylori SNT49	Santal49	Complete Genome
GCF_000315955.1	PRJNA224116	SAMN02604323	210	Helicobacter pylori Aklavik117	Aklavik117	Complete Genome
GCF_000317875.1	PRJNA224116	SAMN02604324	210	Helicobacter pylori Aklavik86	Aklavik86	Complete Genome
GCF_000277365.1	PRJNA224116	SAMN02603193	210	Helicobacter pylori Shi417	Shi417	Complete Genome
GCF_000277405.1	PRJNA224116	SAMN02603194	210	Helicobacter pylori Shi112	Shi112	Complete Genome
GCF_000277385.1	PRJNA224116	SAMN02603195	210	Helicobacter pylori Shi169	Shi169	Complete Genome
GCF_000277425.1	PRJNA224116	SAMN02603196	210	Helicobacter pylori PeCan18	PeCan18	Complete Genome
GCF_000259235.1	PRJNA224116	SAMN02603197	210	Helicobacter pylori HUP-B14	HUP-B14	Complete Genome
GCF_000259275.1	PRJNA224116	SAMN02603198	138563	Helicobacter cetorum MIT 99-5656	MIT 99-5656	Complete Genome
GCF_000284635.1	PRJNA224116	SAMD00061064	213	Helicobacter cinaedi PAGU611	PAGU611	Complete Genome
GCF_000333835.2	PRJNA224116	SAMN02470830	210	Helicobacter pylori A45	A45	Complete Genome
GCF_000307815.1	PRJNA224116	SAMN02603762	210	Helicobacter pylori Rif1	Rif1	Complete Genome
GCF_000307835.1	PRJNA224116	SAMN02603763	210	Helicobacter pylori Rif2	Rif2	Complete Genome
GCF_000348865.1	PRJNA224116	SAMD00061056	210	Helicobacter pylori OK113	OK113	Complete Genome
GCF_000348885.1	PRJNA224116	SAMD00061057	210	Helicobacter pylori OK310	OK310	Complete Genome
GCF_000392455.3	PRJNA224116	SAMN02230257	210	Helicobacter pylori UM032	UM032	Complete Genome
GCF_000392475.3	PRJNA224116	SAMN02230259	210	Helicobacter pylori UM299	UM299	Complete Genome
GCF_000392515.3	PRJNA224116	SAMN02604194	210	Helicobacter pylori UM037	UM037	Complete Genome
GCF_000392535.3	PRJNA224116	SAMN02230271	210	Helicobacter pylori UM066	UM066	Complete Genome
GCF_000439295.2	PRJNA224116	SAMN02641597	210	Helicobacter pylori UM298	UM298	Complete Genome
GCF_000600045.1	PRJNA224116	SAMN03081488	210	Helicobacter pylori oki102	oki102	Complete Genome
GCF_000600085.1	PRJNA224116	SAMN03081489	210	Helicobacter pylori oki112	oki112	Complete Genome
GCF_000600125.1	PRJNA224116	SAMN03081490	210	Helicobacter pylori oki128	oki128	Complete Genome
GCF_000600145.1	PRJNA224116	SAMN03081491	210	Helicobacter pylori oki154	oki154	Complete Genome
GCF_000600165.1	PRJNA224116	SAMN03081492	210	Helicobacter pylori oki422	oki422	Complete Genome
GCF_000600185.1	PRJNA224116	SAMN03081493	210	Helicobacter pylori oki673	oki673	Complete Genome
GCF_000600205.1	PRJNA224116	SAMN03081494	210	Helicobacter pylori oki828	oki828	Complete Genome
GCF_000600225.1	PRJNA224116	SAMN03081495	210	Helicobacter pylori oki898	oki898	Complete Genome
GCF_000826985.1	PRJNA224116	SAMN03268385	210	Helicobacter pylori 26695-1	26695-1	Complete Genome
GCF_000829095.1	PRJNA224116	SAMD00061015	210	Helicobacter pylori 26695-1	26695-1	Complete Genome
GCF_000829115.1	PRJNA224116	SAMD00061016	210	Helicobacter pylori 26695-1CL	26695-1CL	Complete Genome
GCF_000829135.1	PRJNA224116	SAMD00061017	210	Helicobacter pylori 26695-1CH	26695-1CH	Complete Genome
GCF_000498315.1	PRJNA224116	SAMN02376623	210	Helicobacter pylori BM012A	BM012A	Complete Genome
GCF_000498335.1	PRJNA224116	SAMN02376624	210	Helicobacter pylori BM012S	BM012S	Complete Genome
GCF_000828955.1	PRJNA224116	SAMD00061026	210	Helicobacter pylori NY40	NY40	Complete Genome
GCF_001991095.1	PRJNA224116	SAMN04362855	210	Helicobacter pylori PMSS1	PMSS1	Complete Genome
GCF_001602095.1	PRJNA224116	SAMN04578135	1591088	Helicobacter himalayensis	YS1	Complete Genome
GCF_019703305.1	PRJNA224116	SAMD00334520	2849641	Helicobacter sp. NHP19-0003	NHP19-0003	Complete Genome
GCF_019703325.1	PRJNA224116	SAMD00334521	2849642	Helicobacter sp. NHP19-0012	NHP19-0012	Complete Genome
