# Supplementary material for: Comparative Genome Analysis Reveals Accumulation of Single-Nucleotide Repeats in Pathogenic Escherichia Lineages
Source: Curr Issues Mol Biol. 2022 Jan 20;44(2):498–504. doi: 10.3390/cimb44020034 (PMC8928963; doi:10.3390/cimb44020034)
Supplement: Supplementary file 1 [file cimb-44-00034-s001.zip › Table S6.xlsx]

## Sheet: Sheet1
Table S6: Assembly sequences used in phylogenetic tree construction.
Accession no.	Bioproject	Biosample	Species taxid	Organism name	Infraspecific name	Assembly level	Asm name
GCF_000597845.1	PRJNA224116	SAMN02647163	562	Escherichia coli	ST540	Complete Genome	ASM59784v1
GCF_003944565.2	PRJNA224116	SAMN10531910	564	Escherichia fergusonii	EFCF056	Complete Genome	ASM394456v2
GCF_001559615.2	PRJNA224116	SAMN04435507	37762	Escherichia coli B	C2566	Complete Genome	ASM155961v2
GCF_000800765.1	PRJNA224116	SAMN03107000	83333	Escherichia coli K-12	K-12 ER3413	Complete Genome	ASM80076v1
GCF_001307215.1	PRJNA224116	SAMN04103124	83334	Escherichia coli O157:H7	WS4202	Complete Genome	ASM130721v1
GCF_000732965.1	PRJNA224116	SAMN02905113	155864	Escherichia coli O157:H7 str. EDL933	EDL933	Complete Genome	ASM73296v1
GCF_900149875.1	PRJNA224116	SAMEA35194168	168807	Escherichia coli O127:H6		Complete Genome	EPEC1
GCF_007990655.1	PRJNA224116	SAMD00172295	168927	Escherichia coli O111:H-	110512	Complete Genome	ASM799065v1
GCF_000007445.1	PRJNA224116	SAMN02604094	199310	Escherichia coli CFT073	CFT073	Complete Genome	ASM744v1
GCF_001549955.1	PRJNA224116	SAMD00026637	208962	Escherichia albertii	EC06-170	Complete Genome	ASM154995v1
GCF_000027125.1	PRJNA224116	SAMEA2272277	216592	Escherichia coli 042	42	Complete Genome	ASM2712v1
GCF_005037725.1	PRJNA224116	SAMN08768102	244319	Escherichia coli O26:H11	FWSEC0001	Complete Genome	ASM503772v2
GCF_000019425.1	PRJNA224116	SAMN02604262	316385	Escherichia coli str. K-12 substr. DH10B	K-12 substr. DH10B	Complete Genome	ASM1942v1
GCF_000210475.1	PRJNA224116	SAMEA2272237	316401	Escherichia coli ETEC H10407	ETEC H10407	Complete Genome	ASM21047v1
GCF_000010245.2	PRJNA224116	SAMD00061081	316407	Escherichia coli str. K-12 substr. W3110	K-12 substr. W3110	Complete Genome	ASM1024v1
GCF_000714595.1	PRJNA224116	SAMN02794012	316435	Escherichia coli Nissle 1917	Nissle 1917	Complete Genome	ASM71459v1
GCF_000017745.1	PRJNA224116	SAMN02604038	331111	Escherichia coli O139:H28 str. E24377A	E24377A	Complete Genome	ASM1774v1
GCF_000017765.1	PRJNA224116	SAMN02604037	331112	Escherichia coli HS	HS	Complete Genome	ASM1776v1
GCF_000725265.1	PRJNA224116	SAMN02918008	340184	Escherichia coli B7A	B7A	Complete Genome	ASM72526v1
GCF_000167875.2	PRJNA224116	SAMN02435896	340186	Escherichia coli E110019	E110019	Complete Genome	ASM16787v2
GCF_000013305.1	PRJNA224116	SAMN02604181	362663	Escherichia coli 536	536	Complete Genome	ASM1330v1
GCF_000013265.1	PRJNA224116	SAMN00000110	364106	Escherichia coli UTI89	UTI89	Complete Genome	ASM1326v1
GCF_005037805.1	PRJNA224116	SAMN08768106	373045	Escherichia coli O111:NM	FWSEC0005	Complete Genome	ASM503780v2
GCF_005037795.1	PRJNA224116	SAMN08768108	376725	Escherichia coli O103:H2	FWSEC0007	Complete Genome	ASM503779v2
GCF_000008865.2	PRJNA57781	SAMN01911278	386585	Escherichia coli O157:H7 str. Sakai	Sakai substr. RIMD 0509952	Complete Genome	ASM886v2
GCF_000014845.1	PRJNA224116	SAMN02603424	405955	Escherichia coli APEC O1	APEC O1	Complete Genome	ASM1484v1
GCF_000010385.1	PRJNA224116	SAMD00061087	409438	Escherichia coli SE11	SE11	Complete Genome	ASM1038v1
GCF_000017985.1	PRJNA224116	SAMN02603421	413997	Escherichia coli B str. REL606	REL606	Complete Genome	ASM1798v1
GCF_000010485.1	PRJNA224116	SAMD00060923	431946	Escherichia coli SE15	SE15	Complete Genome	ASM1048v1
GCF_000800845.1	PRJNA224116	SAMN03339595	439184	Escherichia coli RS218	RS218	Complete Genome	ASM80084v2
GCF_000019645.1	PRJNA224116	SAMN02604066	439855	Escherichia coli SMS-3-5	SMS-3-5	Complete Genome	ASM1964v1
GCF_000021125.1	PRJNA224116	SAMN02603441	444450	Escherichia coli O157:H7 str. EC4115	EC4115	Complete Genome	ASM2112v1
GCF_000009565.1	PRJNA224116	SAMEA2272558	469008	Escherichia coli BL21(DE3)	BL21(DE3)	Complete Genome	ASM956v1
GCF_000019385.1	PRJNA224116	SAMN02598405	481805	Escherichia coli ATCC 8739	ATCC 8739	Complete Genome	ASM1938v1
GCF_002079225.1	PRJNA224116	SAMN06645125	498388	Escherichia coli C	C	Complete Genome	ASM207922v1
GCF_000005845.2	PRJNA57779	SAMN02604091	511145	Escherichia coli str. K-12 substr. MG1655	K-12 substr. MG1655	Complete Genome	ASM584v2
GCF_013166975.1	PRJNA224116	SAMN14933840	511693	Escherichia coli BL21	BL21	Complete Genome	ASM1316697v1
GCF_000023365.1	PRJNA224116	SAMN02598470	536056	Escherichia coli DH1	DH1	Complete Genome	ASM2336v1
GCF_000022225.1	PRJNA224116	SAMN02604255	544404	Escherichia coli O157:H7 str. TW14359	TW14359	Complete Genome	ASM2222v1
GCF_000184185.1	PRJNA224116	SAMN02602978	566546	Escherichia coli W	W	Complete Genome	ASM18418v1
GCF_002024865.1	PRJNA224116	SAMN06314223	569579	Escherichia coli NU14	NU14	Complete Genome	ASM202486v1
GCF_000091005.1	PRJNA224116	SAMD00060955	573235	Escherichia coli O26:H11 str. 11368	11368	Complete Genome	ASM9100v1
GCF_000026545.1	PRJNA224116	SAMEA1705959	574521	Escherichia coli O127:H6 str. E2348/69	E2348/69	Complete Genome	ASM2654v1
GCF_005037775.1	PRJNA224116	SAMN08768109	577675	Escherichia coli O91:H21	FWSEC0008	Complete Genome	ASM503777v2
GCF_000026265.1	PRJNA224116	SAMEA3138230	585034	Escherichia coli IAI1	IAI1	Complete Genome	ASM2626v1
GCF_000026285.1	PRJNA224116	SAMEA3138231	585035	Escherichia coli S88	S88	Complete Genome	ASM2628v2
GCF_000026225.1	PRJNA224116	SAMEA3138228	585054	Escherichia fergusonii ATCC 35469	ATCC 35469T	Complete Genome	ASM2622v1
GCF_000026245.1	PRJNA224116	SAMEA3138229	585055	Escherichia coli 55989	55989	Complete Genome	ASM2624v1
GCF_000026345.1	PRJNA224116	SAMEA3138234	585057	Escherichia coli IAI39	IAI39	Complete Genome	ASM2634v1
GCF_000010745.1	PRJNA224116	SAMD00060956	585395	Escherichia coli O103:H2 str. 12009	12009	Complete Genome	ASM1074v1
GCF_000010765.1	PRJNA224116	SAMD00060957	585396	Escherichia coli O111:H- str. 11128	11128	Complete Genome	ASM1076v1
GCF_000284495.1	PRJNA224116	SAMEA3138414	591946	Escherichia coli LF82	LF82	Complete Genome	ASM28449v1
GCF_000147855.2	PRJNA224116	SAMN00016779	595495	Escherichia coli KO11FL	KO11	Complete Genome	ASM14785v3
GCF_000022345.1	PRJNA224116	SAMN02603900	595496	Escherichia coli BW2952	K-12 substr. BW2952	Complete Genome	ASM2234v1
GCF_000148365.1	PRJNA224116	SAMN02603258	655817	Escherichia coli ABU 83972	ABU 83972	Complete Genome	ASM14836v1
GCF_000750555.1	PRJNA224116	SAMN03013572	679895	Escherichia coli BW25113	K-12 substr. BW25113	Complete Genome	ASM75055v1
GCF_000183345.1	PRJNA224116	SAMN02603727	685038	Escherichia coli O83:H1 str. NRG 857C	NRG 857C	Complete Genome	ASM18334v1
GCF_000212715.2	PRJNA224116	SAMN02604221	696406	Escherichia coli UMNK88	UMNK88	Complete Genome	ASM21271v2
GCF_000025165.1	PRJNA224116	SAMN02603636	701177	Escherichia coli O55:H7 str. CB9615	CB9615	Complete Genome	ASM2516v1
GCF_000025745.1	PRJNA224116	SAMN02603334	714962	Escherichia coli IHE3034	IHE3034	Complete Genome	ASM2574v1
GCF_000262125.1	PRJNA224116	SAMN02603645	741093	Escherichia coli Xuzhou21	Xuzhou21	Complete Genome	ASM26212v1
GCF_000829985.1	PRJNA224116	SAMN02949643	745156	Escherichia coli 1303	1303	Complete Genome	ASM82998v1
GCF_000831565.1	PRJNA224116	SAMN02949644	758831	Escherichia coli ECC-1470	ECC-1470	Complete Genome	ASM83156v1
GCF_000023665.1	PRJNA224116	SAMN00002656	866768	Escherichia coli 'BL21-Gold(DE3)pLysS AG'	BL21-Gold(DE3)pLysS AG	Complete Genome	ASM2366v1
GCF_003697165.2	PRJNA224116	SAMN10252913	866789	Escherichia coli DSM 30083 = JCM 1649 = ATCC 11775	ATCC 11775	Complete Genome	ASM369716v2
GCF_000148605.1	PRJNA224116	SAMN00017915	869729	Escherichia coli UM146	UM146	Complete Genome	ASM14860v1
GCF_000233895.1	PRJNA224116	SAMN02603903	885275	Escherichia coli str. 'clone D i14'	clone D i14	Complete Genome	ASM23389v1
GCF_000233875.1	PRJNA224116	SAMN02603902	885276	Escherichia coli str. 'clone D i2'	clone D i2	Complete Genome	ASM23387v1
GCF_000257275.1	PRJNA224116	SAMN02603904	910348	Escherichia coli P12b	P12b	Complete Genome	ASM25727v1
GCF_000827105.1	PRJNA224116	SAMN02673556	930406	Escherichia coli O157:H16	Santai	Complete Genome	ASM82710v1
GCF_001874485.1	PRJNA224116	SAMN04605558	941280	Escherichia coli O25b:H4	O25b:H4	Complete Genome	ASM187448v1
GCF_000285655.3	PRJNA224116	SAMEA2272019	941322	Escherichia coli O25b:H4-ST131	EC958	Complete Genome	EC958.v1
GCF_000968515.1	PRJNA224116	SAMN03371467	941323	Escherichia coli VR50	VR50	Complete Genome	ASM96851v1
GCF_002844165.1	PRJNA224116	SAMN07339706	991915	Escherichia coli O121:H19	16-9255	Complete Genome	ASM284416v1
GCF_005037815.1	PRJNA224116	SAMN08768103	991919	Escherichia coli O145:NM	FWSEC0002	Complete Genome	ASM503781v2
GCF_000219515.2	PRJNA224116	SAMN02469619	1001989	Escherichia coli PCN033	PCN033	Complete Genome	ASM21951v3
GCF_002209105.2	PRJNA224116	SAMN06173361	1038927	Escherichia coli O104:H4	FDAARGOS_348	Complete Genome	ASM220910v2
GCF_001650275.1	PRJNA224116	SAMN05007044	1045010	Escherichia coli O157	180-PT54	Complete Genome	ASM165027v1
GCF_000986765.1	PRJNA224116	SAMN03856947	1048254	Escherichia coli O104:H4 str. C227-11	C227-11	Complete Genome	ASM98676v1
GCF_000245515.1	PRJNA224116	SAMN02604278	1048689	Escherichia coli O55:H7 str. RM12579	RM12579	Complete Genome	ASM24551v1
GCF_003112185.1	PRJNA224116	SAMN08724651	1055533	Escherichia coli O26 str. RM8426	RM8426	Complete Genome	ASM311218v1
GCF_003112225.1	PRJNA224116	SAMN08724660	1055534	Escherichia coli O26 str. RM10386	RM10386	Complete Genome	ASM311222v1
GCF_003112165.1	PRJNA224116	SAMN08724650	1055540	Escherichia coli O103 str. RM8385	RM8385	Complete Genome	ASM311216v1
GCF_003112205.1	PRJNA224116	SAMN08165042	1055541	Escherichia coli O43 str. RM10042	RM10042	Complete Genome	ASM311220v1
GCF_003112245.1	PRJNA224116	SAMN08724616	1055542	Escherichia coli O111 str. RM9322	RM9322	Complete Genome	ASM311224v1
GCF_003112145.1	PRJNA224116	SAMN08724618	1055543	Escherichia coli O121 str. RM8352	RM8352	Complete Genome	ASM311214v1
GCF_003586065.1	PRJNA224116	SAMN08724661	1055544	Escherichia coli O145 str. RM9872	RM9872	Complete Genome	EcRM9872
GCF_002716885.1	PRJNA224116	SAMN04623227	1055545	Escherichia coli O91 str. RM7190	RM7190	Complete Genome	ASM271688v1
GCF_000227625.1	PRJNA224116	SAMN02603406	1072459	Escherichia coli O7:K1 str. CE10	CE10	Complete Genome	ASM22762v1
GCF_005014055.1	PRJNA224116	SAMN08768111	1078021	Escherichia coli O113:H21	FWSEC0010	Complete Genome	ASM501405v1
GCF_005037845.1	PRJNA224116	SAMN08768104	1078032	Escherichia coli O45:H2	FWSEC0003	Complete Genome	ASM503784v2
GCF_000299455.1	PRJNA224116	SAMN01831188	1133852	Escherichia coli O104:H4 str. 2011C-3493	2011C-3493	Complete Genome	ASM29945v1
GCF_000299475.1	PRJNA224116	SAMN01831190	1133853	Escherichia coli O104:H4 str. 2009EL-2071	2009EL-2071	Complete Genome	ASM29947v1
GCF_000299255.1	PRJNA224116	SAMN01831189	1134782	Escherichia coli O104:H4 str. 2009EL-2050	2009EL-2050	Complete Genome	ASM29925v1
GCF_003433275.1	PRJNA224116	SAMN02928551	1200752	Escherichia coli NCCP15648	NCCP15648	Complete Genome	ASM343327v1
GCF_000800215.1	PRJNA224116	SAMN03093203	1245474	Escherichia coli ER2796	K-12 ER2796	Complete Genome	ASM80021v1
GCF_000671295.1	PRJNA224116	SAMN03081527	1248823	Escherichia coli O145:H28 str. RM12581	RM12581	Complete Genome	ASM67129v1
GCF_000520035.1	PRJNA224116	SAMN02641383	1248902	Escherichia coli O145:H28 str. RM13514	RM13514	Complete Genome	ASM52003v1
GCF_000662395.1	PRJNA224116	SAMN03081526	1248903	Escherichia coli O145:H28 str. RM12761	RM12761	Complete Genome	ASM66239v1
GCF_000520055.1	PRJNA224116	SAMN02641384	1248915	Escherichia coli O145:H28 str. RM13516	RM13516	Complete Genome	ASM52005v1
GCF_000332755.1	PRJNA224116	SAMN02603426	1274814	Escherichia coli APEC O78	APEC O78	Complete Genome	ASM33275v1
GCF_001051135.1	PRJNA224116	SAMN03852615	1311757	Escherichia coli ACN001	ACN001	Complete Genome	ASM105113v1
GCF_000743255.1	PRJNA224116	SAMN02929659	1322345	Escherichia coli ATCC 25922	ATCC 25922	Complete Genome	ASM74325v1
GCF_000730345.1	PRJNA224116	SAMN02872945	1328859	Escherichia coli O157:H7 str. SS17	SS17	Complete Genome	ASM73034v1
GCF_000813165.1	PRJNA224116	SAMN03274236	1329907	Escherichia coli APEC IMT5155	APEC IMT5155	Complete Genome	ASM81316v1
GCF_000803705.1	PRJNA224116	SAMN03265100	1330457	Escherichia coli O157:H7 str. SS52	SS52	Complete Genome	ASM80370v1
GCF_000464955.2	PRJNA224116	SAMN02147037	1335303	Escherichia coli O104:H21 str. CFSAN002236	ATCC BAA-178	Complete Genome	ASM46495v2
GCF_000468515.1	PRJNA224116	SAMN02604176	1335916	Escherichia coli LY180	LY180	Complete Genome	ASM46851v1
GCF_013167655.1	PRJNA224116	SAMN02304041	1343836	Escherichia coli O157:H7 str. F8092B	F8092B	Complete Genome	ASM1316765v1
GCF_000493755.1	PRJNA224116	SAMN02603887	1355100	Escherichia coli JJ1886	JJ1886	Complete Genome	ASM49375v1
GCF_001593565.1	PRJNA224116	SAMN04481707	1355101	Escherichia coli JJ1887	JJ1887	Complete Genome	ASM159356v1
GCF_001029125.1	PRJNA224116	SAMN03765122	1358422	Escherichia coli PCN061	PCN061	Complete Genome	ASM102912v1
GCF_003586045.1	PRJNA224116	SAMN06445833	1392854	Escherichia coli M8	M8	Complete Genome	E.coli isolate
GCF_001021615.1	PRJNA224116	SAMN03761813	1401688	Escherichia coli APEC O18	APEC O18	Complete Genome	APECO18
GCF_000499485.1	PRJNA224116	SAMEA3138816	1403831	Escherichia coli str. K-12 substr. MC4100	K-12 substr. MC4100	Complete Genome	MYMC4100
GCF_000725305.1	PRJNA224116	SAMN02440167	1435461	Escherichia coli KLY	KLY	Complete Genome	ASM72530v1
GCF_000512125.1	PRJNA224116	SAMN02641387	1440052	Escherichia albertii KF1	KF1	Complete Genome	ASM51212v1
GCF_001610755.1	PRJNA224116	SAMN02580208	1441627	Escherichia coli str. Sanji	Sanji	Complete Genome	ASM161075v1
GCF_002741435.1	PRJNA224116	SAMN07509121	1446701	Escherichia coli O169:H41	2014EL-1345-2	Complete Genome	ASM274143v1
GCF_002741175.1	PRJNA224116	SAMN04578538	1446707	Escherichia coli O25:NM	2014EL-1343-2	Complete Genome	ASM274117v1
GCF_002269325.1	PRJNA224116	SAMN02951658	1446746	Escherichia coli O6:H16	2011EL-1370-2	Complete Genome	ASM226932v1
GCF_002900365.1	PRJNA224116	SAMN08361671	1499973	Escherichia marmotae	HT073016	Complete Genome	ASM290036v1
GCF_008124085.1	PRJNA224116	SAMN12603272	1502658	Escherichia coli O2:H6	PG20180057	Complete Genome	ASM812408v1
GCF_001021635.2	PRJNA224116	SAMN03761814	1954351	Escherichia coli APEC O2-211	APEC O2-211	Complete Genome	ASM102163v2
GCF_009618015.1	PRJNA224116	SAMD00179457	2027293	Escherichia coli O8:H8	16F5M1D1	Complete Genome	ASM961801v1
GCF_005843885.1	PRJNA224116	SAMN07759781	2044467	Escherichia sp. E4742	E4742	Complete Genome	ASM584388v1
GCF_002741255.1	PRJNA224116	SAMN07656205	2048775	Escherichia coli O114:H49	90-9280	Complete Genome	ASM274125v1
GCF_002741455.1	PRJNA224116	SAMN07656206	2048776	Escherichia coli O128:H27	90-9281	Complete Genome	ASM274145v1
GCF_002741215.1	PRJNA224116	SAMN07656203	2048777	Escherichia coli O15:H11	90-9272	Complete Genome	ASM274121v1
GCF_002741595.1	PRJNA224116	SAMN04851096	2048778	Escherichia coli O178:H19	2012C-4431	Complete Genome	ASM274159v1
GCF_002741275.1	PRJNA224116	SAMN07656207	2048779	Escherichia coli O182:H21	D181	Complete Genome	ASM274127v1
GCF_002741315.1	PRJNA224116	SAMN07656209	2048780	Escherichia coli O25:H16	F5505-C1	Complete Genome	ASM274131v1
GCF_002741475.1	PRJNA224116	SAMN07731009	2048781	Escherichia coli O27:H7	B4103-1	Complete Genome	ASM274147v1
GCF_004771135.1	PRJNA224116	SAMN08737532	2126982	Escherichia coli O18:H1	CFSAN067215	Complete Genome	ASM477113v1
GCF_009728565.1	PRJNA224116	SAMN07594018	2491679	Escherichia coli O22:H8	RM10809-3	Complete Genome	ASM972856v1
GCF_006777045.1	PRJNA224116	SAMN12158196	2592065	Escherichia coli O1:H42	CLSC36	Complete Genome	ASM677704v1
GCF_013282315.1	PRJNA224116	SAMN12565117	2603836	Escherichia coli O10:H32	NMBU-W12E19	Complete Genome	ASM1328231v1
GCF_008124105.1	PRJNA224116	SAMN12603270	2605619	Escherichia coli O16:H48	PG20180171	Complete Genome	ASM812410v1
GCF_008124005.1	PRJNA224116	SAMN12603254	2605620	Escherichia coli O80:H26	EC-107	Complete Genome	ASM812400v1
GCF_012584495.1	PRJNA224116	SAMN14573117	2725997	Escherichia sp. SCLE84	SCLE84	Complete Genome	ASM1258449v1
