# Supplementary figures and images for: Comparative Genome Analysis Reveals Accumulation of Single-Nucleotide Repeats in Pathogenic Escherichia Lineages
Source: MDPI journal article supplement (doi:10.3390/cimb44020034), 2022-01-20

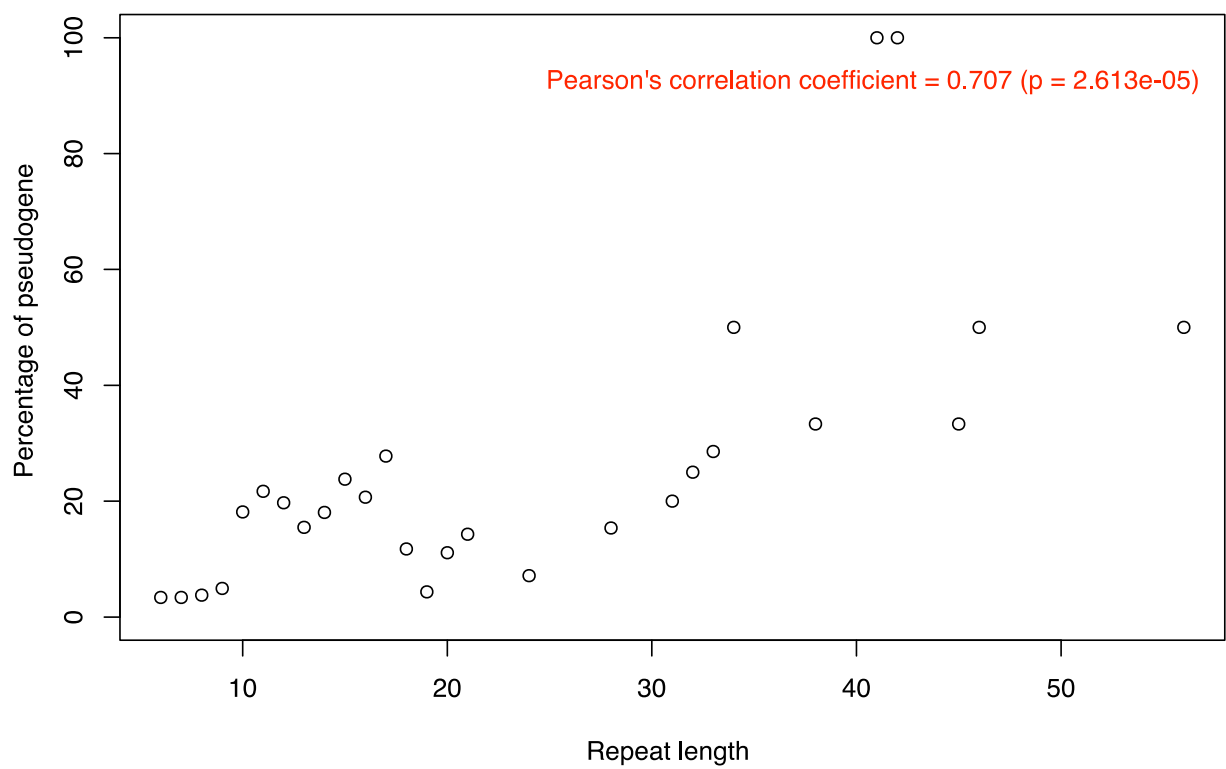

**Figure S7.** Scatter plot of homopolymeric tract repeat lengths in pseudogenes.

Supplement: s1 [file s1]
